# Supplementary material for: A Straightforward Approach to Synthesize 7-Aminocephalosporanic Acid In Vivo in the Cephalosporin C Producer Acremonium chrysogenum
Source: J Fungi (Basel). 2022 Apr 26;8(5):450. doi: 10.3390/jof8050450 (PMC9144927; doi:10.3390/jof8050450)
Supplement: Supplementary file 1 [file jof-08-00450-s001.zip › Lin et al - Supplementary File 2. MS Table.xlsx]

## Sheet: Overview
All presented data based on gel-pieces at positions of either alpha, beta or precursor protein size.
Data shown in reverse alphabetical order (Accession)
Result table - Trypsin
Combined protein identification with tryptic digest and full protein sequence
Result table - Chymotrypsin
Combined protein identification with chymotrypsin digest and full protein sequence
Result table - NT truncation
NT of alpha subunit in various truncations up to the first trypsin cleavage site. Trypsin used as Protease.
Analysis summary
Overview about the processing and consensus workflow used in PD 2.3 and further information.

## Sheet: Result table - Trypsin
Accession	Description	Coverage [%]	# Peptides	# PSMs	# Unique Peptides	# AAs	MW [kDa]	calc. pI	Score Sequest HT: Sequest HT	# Peptides (by Search Engine): Sequest HT	Found in Sample: [S578] F578: Sample, alpha, CCAB-1	Found in Sample: [S579] F579: Sample, precursor, CCAB-1	Found in Sample: [S580] F580: Sample, beta, CCAB-1	Found in Sample: [S587] F587: Sample, alpha, CCAB-2	Found in Sample: [S588] F588: Sample, beta, CCAB-2	Found in Sample: [S589] F589: Sample, beta, CCAB-2	Found in Sample: [S590] F590: Sample, alpha, CCAB-3	Found in Sample: [S591] F591: Sample, alpha, CCAB-3	Found in Sample: [S592] F592: Sample, alpha, CCAB-3	Found in Sample: [S593] F593: Sample, alpha, CCAB-3	Found in Sample: [S594] F594: Sample, alpha, CCAB-3	Found in Sample: [S595] F595: Sample, alpha, CCAB-3	Found in Sample: [S596] F596: Sample, alpha, CCAB-4	Found in Sample: [S597] F597: Sample, alpha, CCAB-4	Found in Sample: [S598] F598: Sample, alpha, CCAB-4	Found in Sample: [S599] F599: Sample, alpha, CCAB-4	Found in Sample: [S600] F600: Sample, alpha, CCAB-4	Found in Sample: [S601] F601: Sample, alpha, CCAB-4	Found in Sample: [S608] F608: Sample, alpha, CCAB-8	Found in Sample: [S609] F609: Sample, precursor, CCAB-8	Found in Sample: [S610] F610: Sample, beta, CCAB-8	Found in Sample: [S623] F623: Sample, alpha, CCAB-11	Found in Sample: [S624] F624: Sample, alpha, CCAB-11	Found in Sample: [S625] F625: Sample, precursor, CCAB-11	Found in Sample: [S626] F626: Sample, precursor, CCAB-11	Found in Sample: [S627] F627: Sample, beta, CCAB-11	Found in Sample: [S628] F628: Sample, beta, CCAB-11	Found in Sample: [S629] F629: Sample, alpha, wild-type b	Found in Sample: [S630] F630: Sample, alpha, wild-type b	Found in Sample: [S631] F631: Sample, precursor, wild-type b	Found in Sample: [S632] F632: Sample, precursor, wild-type b	Found in Sample: [S633] F633: Sample, beta, wild-type b	Found in Sample: [S634] F634: Sample, beta, wild-type b	Found in Sample: [S635] F635: Sample, alpha, wild-type a	Found in Sample: [S636] F636: Sample, precursor, wild-type a	Found in Sample: [S637] F637: Sample, beta, wild-type a	Found in Sample: [S643] F643: Sample, alpha, CCAB-6	Found in Sample: [S644] F644: Sample, alpha, CCAB-6	# Protein Groups
CCAB	beta subunit	49	17	47	17	536	59.5	5.41	145.29	17	Not Found	Not Found	High	Not Found	High	High	Not Found	Not Found	Not Found	Not Found	Not Found	Not Found	Not Found	Not Found	Not Found	Not Found	Not Found	Not Found	Not Found	Not Found	High	Not Found	Not Found	High	Not Found	High	High	Not Found	Not Found	Not Found	Not Found	Not Found	Not Found	Not Found	Not Found	Not Found	Not Found	Not Found	1
Protein Group ID	# Proteins	# Unique Peptides	# Peptides	# PSMs	Group Description	Found in Sample: [S578] F578: Sample, alpha, CCAB-1	Found in Sample: [S579] F579: Sample, precursor, CCAB-1	Found in Sample: [S580] F580: Sample, beta, CCAB-1	Found in Sample: [S587] F587: Sample, alpha, CCAB-2	Found in Sample: [S588] F588: Sample, beta, CCAB-2	Found in Sample: [S589] F589: Sample, beta, CCAB-2	Found in Sample: [S590] F590: Sample, alpha, CCAB-3	Found in Sample: [S591] F591: Sample, alpha, CCAB-3	Found in Sample: [S592] F592: Sample, alpha, CCAB-3	Found in Sample: [S593] F593: Sample, alpha, CCAB-3	Found in Sample: [S594] F594: Sample, alpha, CCAB-3	Found in Sample: [S595] F595: Sample, alpha, CCAB-3	Found in Sample: [S596] F596: Sample, alpha, CCAB-4	Found in Sample: [S597] F597: Sample, alpha, CCAB-4	Found in Sample: [S598] F598: Sample, alpha, CCAB-4	Found in Sample: [S599] F599: Sample, alpha, CCAB-4	Found in Sample: [S600] F600: Sample, alpha, CCAB-4	Found in Sample: [S601] F601: Sample, alpha, CCAB-4	Found in Sample: [S608] F608: Sample, alpha, CCAB-8	Found in Sample: [S609] F609: Sample, precursor, CCAB-8	Found in Sample: [S610] F610: Sample, beta, CCAB-8	Found in Sample: [S623] F623: Sample, alpha, CCAB-11	Found in Sample: [S624] F624: Sample, alpha, CCAB-11	Found in Sample: [S625] F625: Sample, precursor, CCAB-11	Found in Sample: [S626] F626: Sample, precursor, CCAB-11	Found in Sample: [S627] F627: Sample, beta, CCAB-11	Found in Sample: [S628] F628: Sample, beta, CCAB-11	Found in Sample: [S629] F629: Sample, alpha, wild-type b	Found in Sample: [S630] F630: Sample, alpha, wild-type b	Found in Sample: [S631] F631: Sample, precursor, wild-type b	Found in Sample: [S632] F632: Sample, precursor, wild-type b	Found in Sample: [S633] F633: Sample, beta, wild-type b	Found in Sample: [S634] F634: Sample, beta, wild-type b	Found in Sample: [S635] F635: Sample, alpha, wild-type a	Found in Sample: [S636] F636: Sample, precursor, wild-type a	Found in Sample: [S637] F637: Sample, beta, wild-type a	Found in Sample: [S643] F643: Sample, alpha, CCAB-6	Found in Sample: [S644] F644: Sample, alpha, CCAB-6
1153	3	20	20	78	[Master Protein] Precursor (full protein)	High	Not Found	High	High	High	High	High	High	High	High	High	High	High	High	High	High	High	High	High	Not Found	High	High	High	High	Not Found	High	High	Not Found	Not Found	Not Found	Not Found	Not Found	Not Found	Not Found	Not Found	Not Found	Not Found	High
Checked	Confidence	Identifying Node	PSM Ambiguity	Annotated Sequence	Modifications	# Proteins	Master Protein Accessions	Protein Accessions	# Missed Cleavages	Charge	DeltaScore	DeltaCn	Rank	Search Engine Rank	m/z [Da]	MH+ [Da]	Theo. MH+ [Da]	DeltaM [ppm]	Deltam/z [Da]	Activation Type	MS Order	Isolation Interference [%]	Ion Inject Time [ms]	RT [min]	First Scan	Spectrum File	File ID	XCorr	# Protein Groups
FALSE	High	Sequest HT (A2)	Unambiguous	RAEGDIAFWQGLVPGDSSR		2	CCAB	CCAB; CCAB	1	2	0.628	0	1	1	1031.01	2061.01	2061.01	-0.31	-0.00032	CID (Collision Induced Dissociation)	MS2	39.3532	23.713	43.3006	14096	CCAB-11b2.raw	F628	4.92	1
FALSE	High	Sequest HT (A2)	Unambiguous	TLPDLIPAALIDPDPEVQAAAR		2	CCAB	CCAB; CCAB	0	2	0.6749	0	1	1	1143.61	2286.22	2286.23	-6.79	-0.00776	CID (Collision Induced Dissociation)	MS2	61.235	82.029	41.5429	8654	CCAB-8b.raw	F610	4.86	1
FALSE	High	Sequest HT (A2)	Unambiguous	ANLDAFAAGINAYAQQNPDDISPEVR		2	CCAB	CCAB; CCAB	0	3	0.7101	0	1	1	920.774	2760.31	2760.32	-5.12	-0.00471	CID (Collision Induced Dissociation)	MS2	11.1873	16.572	42.8484	13198	CCAB-11a2.raw	F624	4.76	1
FALSE	High	Sequest HT (A2)	Unambiguous	AQQWYAQQSPDFR		2	CCAB	CCAB; CCAB	0	2	0.6718	0	1	1	812.877	1624.75	1624.75	-2.27	-0.00184	CID (Collision Induced Dissociation)	MS2	18.9342	40.669	37.6595	7066	CCAB-3a3-2.raw	F595	4.57	1
FALSE	High	Sequest HT (A2)	Unambiguous	TLPDLIPAALIDPDPEVQAAAR		2	CCAB	CCAB; CCAB	0	3	0.6523	0	1	1	762.751	2286.24	2286.23	1.56	0.00119	CID (Collision Induced Dissociation)	MS2	8.19664	12.764	41.531	8650	CCAB-8b.raw	F610	4.4	1
FALSE	High	Sequest HT (A2)	Unambiguous	ANLDAFAAGINAYAQQNPDDISPEVR		2	CCAB	CCAB; CCAB	0	3	0.7086	0	1	1	920.777	2760.32	2760.32	-2.31	-0.00213	CID (Collision Induced Dissociation)	MS2	9.70957	150	47.0688	8668	CCAB-3a1.raw	F590	4.29	1
FALSE	High	Sequest HT (A2)	Unambiguous	MILNDVNVPGAAGYGNLGSFR		2	CCAB	CCAB; CCAB	0	2	0.6323	0	1	1	1083.04	2165.08	2165.08	-2.57	-0.00278	CID (Collision Induced Dissociation)	MS2	29.305	10	43.6555	14258	CCAB-11b2.raw	F628	4.27	1
FALSE	High	Sequest HT (A2)	Unambiguous	ANLDAFAAGINAYAQQNPDDISPEVR		2	CCAB	CCAB; CCAB	0	3	0.5012	0	1	1	920.78	2760.32	2760.32	0.71	0.00065	CID (Collision Induced Dissociation)	MS2	21.6088	52.189	47.2817	10879	CCAB-4a2-2.raw	F599	4.25	1
FALSE	High	Sequest HT (A2)	Unambiguous	mILNDVNVPGAAGYGNLGSFR	M1(Oxidation)	2	CCAB	CCAB; CCAB	0	3	0.6794	0	1	1	727.703	2181.09	2181.08	8.03	0.00584	CID (Collision Induced Dissociation)	MS2	72.7616	17.58	35.9042	6991	CCAB-8b.raw	F610	4.18	1
FALSE	High	Sequest HT (A2)	Unambiguous	ANLDAFAAGINAYAQQNPDDISPEVR		2	CCAB	CCAB; CCAB	0	3	0.5463	0	1	1	920.78	2760.33	2760.32	1.22	0.00112	CID (Collision Induced Dissociation)	MS2	76.2603	28.117	47.4831	10750	CCAB-3a1-2.raw	F591	4.1	1
FALSE	High	Sequest HT (A2)	Unambiguous	TPFNFKPGGGGSYPYDVPDYA		2	CCAB	CCAB; CCAB	0	2	0.7995	0	1	1	1125.01	2249.02	2249.02	-0.86	-0.00097	CID (Collision Induced Dissociation)	MS2	26.9928	5.809	41.9105	13456	CCAB-11b2.raw	F628	4.09	1
FALSE	High	Sequest HT (A2)	Unambiguous	AQQWYAQQSPDFR		2	CCAB	CCAB; CCAB	0	2	0.6732	0	1	1	812.879	1624.75	1624.75	0.08	6e-05	CID (Collision Induced Dissociation)	MS2	7.48558	37.593	37.2025	6068	CCAB-3a1.raw	F590	4.07	1
FALSE	High	Sequest HT (A2)	Unambiguous	MGITNTVNGMVGATNYR		2	CCAB	CCAB; CCAB	0	2	0.698	0	1	1	899.93	1798.85	1798.86	-2.18	-0.00196	CID (Collision Induced Dissociation)	MS2	67.5255	22.113	37.1802	11261	CCAB-11b2.raw	F628	4.04	1
FALSE	High	Sequest HT (A2)	Unambiguous	AQQWYAQQSPDFR		2	CCAB	CCAB; CCAB	0	2	0.7275	0	1	1	812.879	1624.75	1624.75	0.45	0.00037	CID (Collision Induced Dissociation)	MS2	38.4706	150	37.7098	4772	CCAB-4a3.raw	F600	3.89	1
FALSE	High	Sequest HT (A2)	Unambiguous	ANLDAFAAGINAYAQQNPDDISPEVR		2	CCAB	CCAB; CCAB	0	3	0.5736	0	1	1	920.78	2760.33	2760.32	1.01	0.00093	CID (Collision Induced Dissociation)	MS2	24.2352	150	41.8837	6558	CCAB-1a.raw	F578	3.87	1
FALSE	High	Sequest HT (A2)	Unambiguous	TPFNFKPGGGGSYPYDVPDYA		2	CCAB	CCAB; CCAB	0	2	0.7391	0	1	1	1125.01	2249.02	2249.02	-0.61	-0.00068	CID (Collision Induced Dissociation)	MS2	7.4897	22.384	46.2328	11893	CCAB-2b-2.raw	F589	3.68	1
FALSE	High	Sequest HT (A2)	Unambiguous	AQQWYAQQSPDFR		2	CCAB	CCAB; CCAB	0	2	0.7248	0	1	1	812.877	1624.75	1624.75	-2.15	-0.00175	CID (Collision Induced Dissociation)	MS2	45.2678	134.486	37.5269	5829	CCAB-3a3.raw	F594	3.67	1
FALSE	High	Sequest HT (A2)	Unambiguous	YLWTETHPLDDLPR		2	CCAB	CCAB; CCAB	0	2	0.6027	0	1	1	878.435	1755.86	1755.87	-4.45	-0.0039	CID (Collision Induced Dissociation)	MS2	89.0139	114.954	39.9345	9545	CCAB-11b.raw	F627	3.65	1
FALSE	High	Sequest HT (A2)	Unambiguous	LmSENDDLTLER	M2(Oxidation)	2	CCAB	CCAB; CCAB	0	2	0.5397	0	1	1	726.334	1451.66	1451.67	-4.71	-0.00342	CID (Collision Induced Dissociation)	MS2	50.4741	13.378	28.4264	4077	CCAB-8b.raw	F610	3.65	1
FALSE	High	Sequest HT (A2)	Unambiguous	LmNFLYVASPGR	M2(Oxidation)	2	CCAB	CCAB; CCAB	0	2	0.6082	0	1	1	692.359	1383.71	1383.71	1.11	0.00077	CID (Collision Induced Dissociation)	MS2	34.8675	80.087	43.2148	7703	CCAB-3a1.raw	F590	3.65	1
FALSE	High	Sequest HT (A2)	Unambiguous	LmNFLYVASPGR	M2(Oxidation)	2	CCAB	CCAB; CCAB	0	2	0.6278	0	1	1	692.359	1383.71	1383.71	0.61	0.00042	CID (Collision Induced Dissociation)	MS2	40.8066	150	43.4637	6925	CCAB-4a1.raw	F596	3.6	1
FALSE	High	Sequest HT (A2)	Unambiguous	LMSENDDLTLER		2	CCAB	CCAB; CCAB	0	2	0.5738	0	1	1	718.339	1435.67	1435.67	-1.79	-0.00129	CID (Collision Induced Dissociation)	MS2	46.0952	33.516	36.6568	6727	CCAB-2b.raw	F588	3.59	1
FALSE	High	Sequest HT (A2)	Unambiguous	LmNFLYVASPGR	M2(Oxidation)	2	CCAB	CCAB; CCAB	0	2	0.5281	0	1	1	692.36	1383.71	1383.71	2.66	0.00184	CID (Collision Induced Dissociation)	MS2	35.3121	150	34.5502	5174	CCAB-8a.raw	F608	3.56	1
FALSE	High	Sequest HT (A2)	Unambiguous	ANLDAFAAGINAYAQQNPDDISPEVR		2	CCAB	CCAB; CCAB	0	3	0.6394	0	1	1	920.779	2760.32	2760.32	-0.31	-0.00028	CID (Collision Induced Dissociation)	MS2	19.8426	150	47.3403	7834	CCAB-4a1.raw	F596	3.55	1
FALSE	High	Sequest HT (A2)	Unambiguous	MGITNTVNGMVGATNYR		2	CCAB	CCAB; CCAB	0	2	0.7265	0	1	1	899.929	1798.85	1798.86	-3.74	-0.00336	CID (Collision Induced Dissociation)	MS2	44.8203	129.107	36.9156	8329	CCAB-11b.raw	F627	3.51	1
FALSE	High	Sequest HT (A2)	Unambiguous	LmNFLYVASPGR	M2(Oxidation)	2	CCAB	CCAB; CCAB	0	2	0.6406	0	1	1	692.356	1383.71	1383.71	-2.5	-0.00173	CID (Collision Induced Dissociation)	MS2	30.4664	25.375	40.7643	8954	CCAB6-a2.raw	F644	3.45	1
FALSE	High	Sequest HT (A2)	Unambiguous	LmNFLYVASPGR	M2(Oxidation)	2	CCAB	CCAB; CCAB	0	2	0.5291	0	1	1	692.358	1383.71	1383.71	-0.66	-0.00046	CID (Collision Induced Dissociation)	MS2	13.923	144.69	43.626	7805	CCAB-4a3-2.raw	F601	3.44	1
FALSE	High	Sequest HT (A2)	Unambiguous	DFPSYLAPQTPHSLR		2	CCAB	CCAB; CCAB	0	2	0.6076	0	1	1	864.937	1728.87	1728.87	-2.56	-0.00221	CID (Collision Induced Dissociation)	MS2	43.3346	8.779	37.2189	11278	CCAB-11b2.raw	F628	3.44	1
FALSE	High	Sequest HT (A2)	Unambiguous	AQQWYAQQSPDFR		2	CCAB	CCAB; CCAB	0	3	0.6176	0	1	1	542.255	1624.75	1624.75	0.17	9e-05	CID (Collision Induced Dissociation)	MS2	22.5195	150	37.7836	4789	CCAB-4a3.raw	F600	3.4	1
FALSE	High	Sequest HT (A2)	Unambiguous	LmNFLYVASPGR	M2(Oxidation)	2	CCAB	CCAB; CCAB	0	2	0.5163	0	1	1	692.357	1383.71	1383.71	-1.17	-0.00081	CID (Collision Induced Dissociation)	MS2	59.6617	73.125	43.5938	9285	CCAB-2a3-2.raw	F587	3.37	1
FALSE	High	Sequest HT (A2)	Unambiguous	TPFNFKPGGGGSYPYDVPDYA		2	CCAB	CCAB; CCAB	0	2	0.7679	0	1	1	1125.01	2249.02	2249.02	0.73	0.00082	CID (Collision Induced Dissociation)	MS2	23.5408	81.123	45.7613	10404	CCAB-2b.raw	F588	3.36	1
FALSE	High	Sequest HT (A2)	Unambiguous	ANLDAFAAGINAYAQQNPDDISPEVR		2	CCAB	CCAB; CCAB	0	3	0.5701	0	1	1	920.778	2760.32	2760.32	-0.9	-0.00083	CID (Collision Induced Dissociation)	MS2	16.0209	150	47.584	10290	CCAB-3a3-2.raw	F595	3.35	1
FALSE	High	Sequest HT (A2)	Unambiguous	LmSENDDLTLER	M2(Oxidation)	2	CCAB	CCAB; CCAB	0	2	0.5701	0	1	1	726.335	1451.66	1451.67	-3.93	-0.00285	CID (Collision Induced Dissociation)	MS2	57.9398	15.879	30.6797	8154	CCAB-11b2.raw	F628	3.28	1
FALSE	High	Sequest HT (A2)	Unambiguous	AQQWYAQQSPDFR		2	CCAB	CCAB; CCAB	0	2	0.6616	0	1	1	812.878	1624.75	1624.75	-1.56	-0.00127	CID (Collision Induced Dissociation)	MS2	50.2783	150	37.6335	5732	CCAB-3a2.raw	F592	3.28	1
FALSE	High	Sequest HT (A2)	Unambiguous	LmNFLYVASPGR	M2(Oxidation)	2	CCAB	CCAB; CCAB	0	2	0.5849	0	1	1	692.358	1383.71	1383.71	-0.48	-0.00034	CID (Collision Induced Dissociation)	MS2	32.7994	61.745	43.7826	8258	CCAB-4a1-2.raw	F597	3.18	1
FALSE	High	Sequest HT (A2)	Unambiguous	LmSENDDLTLER	M2(Oxidation)	2	CCAB	CCAB; CCAB	0	2	0.4525	0	1	1	726.341	1451.67	1451.67	4.43	0.00321	CID (Collision Induced Dissociation)	MS2	18.556	19.755	33.4526	6137	CCAB-2b-2.raw	F589	3.16	1
FALSE	High	Sequest HT (A2)	Unambiguous	LMNFLYVASPGR		2	CCAB	CCAB; CCAB	0	2	0.3758	0	1	1	684.36	1367.71	1367.71	-1.24	-0.00085	CID (Collision Induced Dissociation)	MS2	30.8889	150	48.5865	10008	CCAB-3a2-2.raw	F593	3.14	1
FALSE	High	Sequest HT (A2)	Unambiguous	ANLDAFAAGINAYAQQNPDDISPEVR		2	CCAB	CCAB; CCAB	0	3	0.5335	0	1	1	920.781	2760.33	2760.32	2.09	0.00192	CID (Collision Induced Dissociation)	MS2	12.7125	150	47.5369	10277	CCAB-3a3-2.raw	F595	3.13	1
FALSE	High	Sequest HT (A2)	Unambiguous	ANLDAFAAGINAYAQQNPDDISPEVR		2	CCAB	CCAB; CCAB	0	3	0.5788	0	1	1	920.78	2760.33	2760.32	1.43	0.00131	CID (Collision Induced Dissociation)	MS2	20.9934	150	47.1914	8425	CCAB-4a2.raw	F598	3.11	1
FALSE	High	Sequest HT (A2)	Unambiguous	AQQWYAQQSPDFR		2	CCAB	CCAB; CCAB	0	3	0.5032	0	1	1	542.255	1624.75	1624.75	-0.52	-0.00028	CID (Collision Induced Dissociation)	MS2	44.965	73.55	37.6094	5852	CCAB-3a3.raw	F594	3.1	1
FALSE	High	Sequest HT (A2)	Unambiguous	AALLFEEWAR		2	CCAB	CCAB; CCAB	0	2	0.5097	0	1	1	603.322	1205.64	1205.63	3.74	0.00226	CID (Collision Induced Dissociation)	MS2	51.6481	30.345	37.8596	7661	CCAB-8b.raw	F610	3.1	1
FALSE	High	Sequest HT (A2)	Unambiguous	LmNFLYVASPGR	M2(Oxidation)	2	CCAB	CCAB; CCAB	0	2	0.5405	0	1	1	692.357	1383.71	1383.71	-1.33	-0.00092	CID (Collision Induced Dissociation)	MS2	58.3791	150	43.9887	8804	CCAB-3a2-2.raw	F593	3.09	1
FALSE	High	Sequest HT (A2)	Unambiguous	MILNDVNVPGAAGYGNLGSFR		2	CCAB	CCAB; CCAB	0	3	0.4545	0	1	1	722.366	2165.08	2165.08	1.6	0.00115	CID (Collision Induced Dissociation)	MS2	82.6556	33.255	47.7834	11151	CCAB-2b.raw	F588	3.08	1
FALSE	High	Sequest HT (A2)	Unambiguous	QADGTTVDKPLEIR		2	CCAB	CCAB; CCAB	0	2	0.5065	0	1	1	771.908	1542.81	1542.81	-2.74	-0.00212	CID (Collision Induced Dissociation)	MS2	22.4901	41.807	32.9087	5211	CCAB-2b.raw	F588	3.08	1
FALSE	High	Sequest HT (A2)	Unambiguous	LMNFLYVASPGR		2	CCAB	CCAB; CCAB	0	2	0.3214	0	1	1	684.36	1367.71	1367.71	-0.47	-0.00032	CID (Collision Induced Dissociation)	MS2	54.4408	50.44	48.3134	10984	CCAB-3a1-2.raw	F591	3.08	1
FALSE	High	Sequest HT (A2)	Unambiguous	DFPSYLAPQTPHSLR		2	CCAB	CCAB; CCAB	0	2	0.6013	0	1	1	864.939	1728.87	1728.87	0.5	0.00043	CID (Collision Induced Dissociation)	MS2	25.6466	40.903	41.2568	8615	CCAB-2b.raw	F588	3.06	1
FALSE	High	Sequest HT (A2)	Unambiguous	LMNFLYVASPGR		2	CCAB	CCAB; CCAB	0	2	0.2171	0	1	1	684.361	1367.71	1367.71	-0.17	-0.00012	CID (Collision Induced Dissociation)	MS2	59.8175	150	47.7533	8433	CCAB-3a3.raw	F594	3.04	1
FALSE	High	Sequest HT (A2)	Unambiguous	LMNFLYVASPGR		2	CCAB	CCAB; CCAB	0	2	0.3828	0	1	1	684.361	1367.71	1367.71	0.39	0.00027	CID (Collision Induced Dissociation)	MS2	59.6205	150	47.6007	8793	CCAB-3a1.raw	F590	3.03	1
FALSE	High	Sequest HT (A2)	Unambiguous	REQVEAAVQER		2	CCAB	CCAB; CCAB	1	2	0.4667	0	1	1	657.84	1314.67	1314.68	-2.34	-0.00154	CID (Collision Induced Dissociation)	MS2	25.9038	39.976	23.4881	4758	CCAB-11b2.raw	F628	3	1
FALSE	High	Sequest HT (A2)	Unambiguous	MILNDVNVPGAAGYGNLGSFR		2	CCAB	CCAB; CCAB	0	3	0.5912	0	1	1	722.364	2165.08	2165.08	-1.9	-0.00137	CID (Collision Induced Dissociation)	MS2	32.0821	2.773	43.6992	14278	CCAB-11b2.raw	F628	2.96	1
FALSE	High	Sequest HT (A2)	Unambiguous	MILNDVNVPGAAGYGNLGSFR		2	CCAB	CCAB; CCAB	0	2	0.5777	0	1	1	1083.04	2165.08	2165.08	-0.76	-0.00082	CID (Collision Induced Dissociation)	MS2	8.28227	33.5	42.7631	10634	CCAB-11b.raw	F627	2.96	1
FALSE	High	Sequest HT (A2)	Unambiguous	LMSENDDLTLER		2	CCAB	CCAB; CCAB	0	2	0.6122	0	1	1	718.339	1435.67	1435.67	-1.68	-0.00121	CID (Collision Induced Dissociation)	MS2	46.7529	15.189	36.5391	7526	CCAB-2b-2.raw	F589	2.94	1
FALSE	High	Sequest HT (A2)	Unambiguous	QPGTTHYSDQIER		2	CCAB	CCAB; CCAB	0	2	0.6894	0	1	1	766.36	1531.71	1531.71	-0.59	-0.00046	CID (Collision Induced Dissociation)	MS2	64.0875	87.256	24.6613	5284	CCAB-11b2.raw	F628	2.93	1
FALSE	High	Sequest HT (A2)	Unambiguous	LTLQDGGYLYDGQVRPFER		2	CCAB	CCAB; CCAB	0	3	0.4664	0	1	1	743.042	2227.11	2227.11	-0.91	-0.00067	CID (Collision Induced Dissociation)	MS2	15.3328	1.084	39.4384	12319	CCAB-11b2.raw	F628	2.83	1
FALSE	High	Sequest HT (A2)	Unambiguous	ANLDAFAAGINAYAQQNPDDISPEVR		2	CCAB	CCAB; CCAB	0	3	0.4912	0	1	1	920.777	2760.32	2760.32	-2.02	-0.00186	CID (Collision Induced Dissociation)	MS2	8.1262	150	47.1585	8294	CCAB-3a3.raw	F594	2.83	1
FALSE	High	Sequest HT (A2)	Unambiguous	QADGTTVDKPLEIR		2	CCAB	CCAB; CCAB	0	2	0.4397	0	1	1	771.912	1542.82	1542.81	2.5	0.00193	CID (Collision Induced Dissociation)	MS2	53.8256	76.645	28.9378	5052	CCAB-11b.raw	F627	2.82	1
FALSE	High	Sequest HT (A2)	Unambiguous	AQQWYAQQSPDFR		2	CCAB	CCAB; CCAB	0	2	0.5071	0	1	1	812.881	1624.76	1624.75	3.33	0.00271	CID (Collision Induced Dissociation)	MS2	89.0832	138.979	33.226	6060	CCAB-11a.raw	F623	2.82	1
FALSE	High	Sequest HT (A2)	Unambiguous	LLAAWDREFTSDSR		2	CCAB	CCAB; CCAB	1	3	0.6354	0	1	1	556.277	1666.82	1666.82	-1.47	-0.00081	CID (Collision Induced Dissociation)	MS2	51.7654	44.934	41.6843	8789	CCAB-2b.raw	F588	2.77	1
FALSE	High	Sequest HT (A2)	Unambiguous	QADGTTVDKPLEIR		2	CCAB	CCAB; CCAB	0	3	0.3926	0	1	1	514.942	1542.81	1542.81	-0.1	-5e-05	CID (Collision Induced Dissociation)	MS2	25.7412	4.167	33.0374	5958	CCAB-2b-2.raw	F589	2.7	1
FALSE	High	Sequest HT (A2)	Unambiguous	LMSENDDLTLER		2	CCAB	CCAB; CCAB	0	2	0.6074	0	1	1	718.339	1435.67	1435.67	-1.74	-0.00125	CID (Collision Induced Dissociation)	MS2	42.6673	10.124	32.913	6687	CCAB-11b.raw	F627	2.7	1
FALSE	High	Sequest HT (A2)	Unambiguous	VFTWSDPDENGVR		2	CCAB	CCAB; CCAB	0	2	0.5774	0	1	1	761.35	1521.69	1521.7	-2.38	-0.00181	CID (Collision Induced Dissociation)	MS2	54.2416	16.774	35.8562	7901	CCAB-11b.raw	F627	2.65	1
FALSE	High	Sequest HT (A2)	Unambiguous	DFPSYLAPQTPHSLR		2	CCAB	CCAB; CCAB	0	2	0.5227	0	1	1	864.944	1728.88	1728.87	5.97	0.00516	CID (Collision Induced Dissociation)	MS2	87.7563	118.738	36.5037	8160	CCAB-11b.raw	F627	2.64	1
FALSE	High	Sequest HT (A2)	Unambiguous	EQVEAAVQER		2	CCAB	CCAB; CCAB	0	2	0.3985	0	1	1	579.791	1158.57	1158.57	0.03	2e-05	CID (Collision Induced Dissociation)	MS2	49.4297	135.986	24.0427	3308	CCAB-11b.raw	F627	2.61	1
FALSE	High	Sequest HT (A2)	Unambiguous	YLWTETHPLDDLPR		2	CCAB	CCAB; CCAB	0	2	0.4015	0	1	1	878.438	1755.87	1755.87	-0.97	-0.00085	CID (Collision Induced Dissociation)	MS2	40.5653	11.643	40.4527	12797	CCAB-11b2.raw	F628	2.59	1
FALSE	High	Sequest HT (A2)	Unambiguous	LMSENDDLTLER		2	CCAB	CCAB; CCAB	0	2	0.3976	0	1	1	718.341	1435.68	1435.67	1.44	0.00104	CID (Collision Induced Dissociation)	MS2	48.4734	150	30.3946	5479	CCAB-1b.raw	F580	2.54	1
FALSE	High	Sequest HT (A2)	Unambiguous	YLWTETHPLDDLPR		2	CCAB	CCAB; CCAB	0	3	0.6457	0	1	1	585.959	1755.86	1755.87	-4.75	-0.00278	CID (Collision Induced Dissociation)	MS2	63.4154	55.256	35.8831	6984	CCAB-8b.raw	F610	2.54	1
FALSE	High	Sequest HT (A2)	Unambiguous	EQVEAAVQER		2	CCAB	CCAB; CCAB	0	2	0.4643	0	1	1	579.791	1158.57	1158.57	-0.39	-0.00023	CID (Collision Induced Dissociation)	MS2	46.7609	127.292	45.1846	5634	CCAB-11ab.raw	F625	2.52	1
FALSE	High	Sequest HT (A2)	Unambiguous	LFAGQNFAGQAGFATPWSLDKPVSTPYGLR		2	CCAB	CCAB; CCAB	0	3	0.5378	0	1	1	1066.21	3196.61	3196.62	-2.71	-0.00289	CID (Collision Induced Dissociation)	MS2	6.82632	52.116	46.7113	12101	CCAB-11b.raw	F627	2.51	1
FALSE	High	Sequest HT (A2)	Unambiguous	EQVEAAVQER		2	CCAB	CCAB; CCAB	0	2	0.468	0	1	1	579.79	1158.57	1158.57	-1.39	-0.0008	CID (Collision Induced Dissociation)	MS2	71.4891	150	26.1173	3526	CCAB-2b-2.raw	F589	2.5	1
FALSE	High	Sequest HT (A2)	Unambiguous	TPFNFKPGGGGSYPYDVPDYA		2	CCAB	CCAB; CCAB	0	2	0.744	0	1	1	1125.01	2249.02	2249.02	1.51	0.0017	CID (Collision Induced Dissociation)	MS2	47.6629	63.846	41.0269	9966	CCAB-11b.raw	F627	2.5	1
FALSE	High	Sequest HT (A2)	Unambiguous	LMSENDDLTLER		2	CCAB	CCAB; CCAB	0	2	0.5502	0	1	1	718.34	1435.67	1435.67	-0.99	-0.00071	CID (Collision Induced Dissociation)	MS2	23.8136	32.573	33.0544	6746	CCAB-11b.raw	F627	2.49	1
FALSE	High	Sequest HT (A2)	Unambiguous	AQQWYAQQSPDFR		2	CCAB	CCAB; CCAB	0	3	0.6371	0	1	1	542.255	1624.75	1624.75	0.07	4e-05	CID (Collision Induced Dissociation)	MS2	47.2278	38.255	37.682	6412	CCAB-4a1-2.raw	F597	2.48	1
FALSE	High	Sequest HT (A2)	Unambiguous	TLPDLIPAALIDPDPEVQAAAR		2	CCAB	CCAB; CCAB	0	3	0.3852	0	1	1	762.749	2286.23	2286.23	-0.61	-0.00047	CID (Collision Induced Dissociation)	MS2	28.1306	7.975	50.1009	12129	CCAB-2b.raw	F588	2.44	1
FALSE	High	Sequest HT (A2)	Unambiguous	EQVEAAVQER		2	CCAB	CCAB; CCAB	0	2	0.5123	0	1	1	579.793	1158.58	1158.57	2.67	0.00155	CID (Collision Induced Dissociation)	MS2	70.0641	150	44.4194	5447	CCAB-11ab.raw	F625	2.44	1
FALSE	High	Sequest HT (A2)	Unambiguous	VFTWSDPDENGVR		2	CCAB	CCAB; CCAB	0	2	0.5205	0	1	1	761.352	1521.7	1521.7	0.44	0.00034	CID (Collision Induced Dissociation)	MS2	56.4991	7.451	36.09	10747	CCAB-11b2.raw	F628	2.44	1
FALSE	High	Sequest HT (A2)	Unambiguous	QPGTTHYSDQIER		2	CCAB	CCAB; CCAB	0	3	0.4184	0	1	1	511.241	1531.71	1531.71	-2.64	-0.00135	CID (Collision Induced Dissociation)	MS2	77.4579	39.732	24.5947	2580	CCAB-8b.raw	F610	2.39	1
FALSE	High	Sequest HT (A2)	Unambiguous	EQVEAAVQER		2	CCAB	CCAB; CCAB	0	2	0.3755	0	1	1	579.792	1158.58	1158.57	1.49	0.00086	CID (Collision Induced Dissociation)	MS2	62.9497	116.978	45.9487	5825	CCAB-11ab.raw	F625	2.29	1
FALSE	High	Sequest HT (A2)	Unambiguous	LTLQDGGYLYDGQVRPFER		2	CCAB	CCAB; CCAB	0	2	0.3102	0	1	1	1114.06	2227.11	2227.11	-3.43	-0.00381	CID (Collision Induced Dissociation)	MS2	48.7115	15.114	39.4204	12313	CCAB-11b2.raw	F628	2.16	1
CCAB	Precursor (full protein)	44	20	78	20	717	79.2	5.53	253.45	20	High	Not Found	High	High	High	High	High	High	High	High	High	High	High	High	High	High	High	High	High	Not Found	High	High	High	High	Not Found	High	High	Not Found	Not Found	Not Found	Not Found	Not Found	Not Found	Not Found	Not Found	Not Found	Not Found	High	1
Protein Group ID	# Proteins	# Unique Peptides	# Peptides	# PSMs	Group Description	Found in Sample: [S578] F578: Sample, alpha, CCAB-1	Found in Sample: [S579] F579: Sample, precursor, CCAB-1	Found in Sample: [S580] F580: Sample, beta, CCAB-1	Found in Sample: [S587] F587: Sample, alpha, CCAB-2	Found in Sample: [S588] F588: Sample, beta, CCAB-2	Found in Sample: [S589] F589: Sample, beta, CCAB-2	Found in Sample: [S590] F590: Sample, alpha, CCAB-3	Found in Sample: [S591] F591: Sample, alpha, CCAB-3	Found in Sample: [S592] F592: Sample, alpha, CCAB-3	Found in Sample: [S593] F593: Sample, alpha, CCAB-3	Found in Sample: [S594] F594: Sample, alpha, CCAB-3	Found in Sample: [S595] F595: Sample, alpha, CCAB-3	Found in Sample: [S596] F596: Sample, alpha, CCAB-4	Found in Sample: [S597] F597: Sample, alpha, CCAB-4	Found in Sample: [S598] F598: Sample, alpha, CCAB-4	Found in Sample: [S599] F599: Sample, alpha, CCAB-4	Found in Sample: [S600] F600: Sample, alpha, CCAB-4	Found in Sample: [S601] F601: Sample, alpha, CCAB-4	Found in Sample: [S608] F608: Sample, alpha, CCAB-8	Found in Sample: [S609] F609: Sample, precursor, CCAB-8	Found in Sample: [S610] F610: Sample, beta, CCAB-8	Found in Sample: [S623] F623: Sample, alpha, CCAB-11	Found in Sample: [S624] F624: Sample, alpha, CCAB-11	Found in Sample: [S625] F625: Sample, precursor, CCAB-11	Found in Sample: [S626] F626: Sample, precursor, CCAB-11	Found in Sample: [S627] F627: Sample, beta, CCAB-11	Found in Sample: [S628] F628: Sample, beta, CCAB-11	Found in Sample: [S629] F629: Sample, alpha, wild-type b	Found in Sample: [S630] F630: Sample, alpha, wild-type b	Found in Sample: [S631] F631: Sample, precursor, wild-type b	Found in Sample: [S632] F632: Sample, precursor, wild-type b	Found in Sample: [S633] F633: Sample, beta, wild-type b	Found in Sample: [S634] F634: Sample, beta, wild-type b	Found in Sample: [S635] F635: Sample, alpha, wild-type a	Found in Sample: [S636] F636: Sample, precursor, wild-type a	Found in Sample: [S637] F637: Sample, beta, wild-type a	Found in Sample: [S643] F643: Sample, alpha, CCAB-6	Found in Sample: [S644] F644: Sample, alpha, CCAB-6
1153	3	20	20	78	[Master Protein] Precursor (full protein)	High	Not Found	High	High	High	High	High	High	High	High	High	High	High	High	High	High	High	High	High	Not Found	High	High	High	High	Not Found	High	High	Not Found	Not Found	Not Found	Not Found	Not Found	Not Found	Not Found	Not Found	Not Found	Not Found	High
Checked	Confidence	Identifying Node	PSM Ambiguity	Annotated Sequence	Modifications	# Proteins	Master Protein Accessions	Protein Accessions	# Missed Cleavages	Charge	DeltaScore	DeltaCn	Rank	Search Engine Rank	m/z [Da]	MH+ [Da]	Theo. MH+ [Da]	DeltaM [ppm]	Deltam/z [Da]	Activation Type	MS Order	Isolation Interference [%]	Ion Inject Time [ms]	RT [min]	First Scan	Spectrum File	File ID	XCorr	# Protein Groups
FALSE	High	Sequest HT (A2)	Unambiguous	RAEGDIAFWQGLVPGDSSR		2	CCAB	CCAB; CCAB	1	2	0.628	0	1	1	1031.01	2061.01	2061.01	-0.31	-0.00032	CID (Collision Induced Dissociation)	MS2	39.3532	23.713	43.3006	14096	CCAB-11b2.raw	F628	4.92	1
FALSE	High	Sequest HT (A2)	Unambiguous	TLPDLIPAALIDPDPEVQAAAR		2	CCAB	CCAB; CCAB	0	2	0.6749	0	1	1	1143.61	2286.22	2286.23	-6.79	-0.00776	CID (Collision Induced Dissociation)	MS2	61.235	82.029	41.5429	8654	CCAB-8b.raw	F610	4.86	1
FALSE	High	Sequest HT (A2)	Unambiguous	ANLDAFAAGINAYAQQNPDDISPEVR		2	CCAB	CCAB; CCAB	0	3	0.7101	0	1	1	920.774	2760.31	2760.32	-5.12	-0.00471	CID (Collision Induced Dissociation)	MS2	11.1873	16.572	42.8484	13198	CCAB-11a2.raw	F624	4.76	1
FALSE	High	Sequest HT (A2)	Unambiguous	AQQWYAQQSPDFR		2	CCAB	CCAB; CCAB	0	2	0.6718	0	1	1	812.877	1624.75	1624.75	-2.27	-0.00184	CID (Collision Induced Dissociation)	MS2	18.9342	40.669	37.6595	7066	CCAB-3a3-2.raw	F595	4.57	1
FALSE	High	Sequest HT (A2)	Unambiguous	TLPDLIPAALIDPDPEVQAAAR		2	CCAB	CCAB; CCAB	0	3	0.6523	0	1	1	762.751	2286.24	2286.23	1.56	0.00119	CID (Collision Induced Dissociation)	MS2	8.19664	12.764	41.531	8650	CCAB-8b.raw	F610	4.4	1
FALSE	High	Sequest HT (A2)	Unambiguous	ANLDAFAAGINAYAQQNPDDISPEVR		2	CCAB	CCAB; CCAB	0	3	0.7086	0	1	1	920.777	2760.32	2760.32	-2.31	-0.00213	CID (Collision Induced Dissociation)	MS2	9.70957	150	47.0688	8668	CCAB-3a1.raw	F590	4.29	1
FALSE	High	Sequest HT (A2)	Unambiguous	MILNDVNVPGAAGYGNLGSFR		2	CCAB	CCAB; CCAB	0	2	0.6323	0	1	1	1083.04	2165.08	2165.08	-2.57	-0.00278	CID (Collision Induced Dissociation)	MS2	29.305	10	43.6555	14258	CCAB-11b2.raw	F628	4.27	1
FALSE	High	Sequest HT (A2)	Unambiguous	ANLDAFAAGINAYAQQNPDDISPEVR		2	CCAB	CCAB; CCAB	0	3	0.5012	0	1	1	920.78	2760.32	2760.32	0.71	0.00065	CID (Collision Induced Dissociation)	MS2	21.6088	52.189	47.2817	10879	CCAB-4a2-2.raw	F599	4.25	1
FALSE	High	Sequest HT (A2)	Unambiguous	mILNDVNVPGAAGYGNLGSFR	M1(Oxidation)	2	CCAB	CCAB; CCAB	0	3	0.6794	0	1	1	727.703	2181.09	2181.08	8.03	0.00584	CID (Collision Induced Dissociation)	MS2	72.7616	17.58	35.9042	6991	CCAB-8b.raw	F610	4.18	1
FALSE	High	Sequest HT (A2)	Unambiguous	ANLDAFAAGINAYAQQNPDDISPEVR		2	CCAB	CCAB; CCAB	0	3	0.5463	0	1	1	920.78	2760.33	2760.32	1.22	0.00112	CID (Collision Induced Dissociation)	MS2	76.2603	28.117	47.4831	10750	CCAB-3a1-2.raw	F591	4.1	1
FALSE	High	Sequest HT (A2)	Unambiguous	TPFNFKPGGGGSYPYDVPDYA		2	CCAB	CCAB; CCAB	0	2	0.7995	0	1	1	1125.01	2249.02	2249.02	-0.86	-0.00097	CID (Collision Induced Dissociation)	MS2	26.9928	5.809	41.9105	13456	CCAB-11b2.raw	F628	4.09	1
FALSE	High	Sequest HT (A2)	Unambiguous	AQQWYAQQSPDFR		2	CCAB	CCAB; CCAB	0	2	0.6732	0	1	1	812.879	1624.75	1624.75	0.08	6e-05	CID (Collision Induced Dissociation)	MS2	7.48558	37.593	37.2025	6068	CCAB-3a1.raw	F590	4.07	1
FALSE	High	Sequest HT (A2)	Unambiguous	MGITNTVNGMVGATNYR		2	CCAB	CCAB; CCAB	0	2	0.698	0	1	1	899.93	1798.85	1798.86	-2.18	-0.00196	CID (Collision Induced Dissociation)	MS2	67.5255	22.113	37.1802	11261	CCAB-11b2.raw	F628	4.04	1
FALSE	High	Sequest HT (A2)	Unambiguous	AQQWYAQQSPDFR		2	CCAB	CCAB; CCAB	0	2	0.7275	0	1	1	812.879	1624.75	1624.75	0.45	0.00037	CID (Collision Induced Dissociation)	MS2	38.4706	150	37.7098	4772	CCAB-4a3.raw	F600	3.89	1
FALSE	High	Sequest HT (A2)	Unambiguous	ANLDAFAAGINAYAQQNPDDISPEVR		2	CCAB	CCAB; CCAB	0	3	0.5736	0	1	1	920.78	2760.33	2760.32	1.01	0.00093	CID (Collision Induced Dissociation)	MS2	24.2352	150	41.8837	6558	CCAB-1a.raw	F578	3.87	1
FALSE	High	Sequest HT (A2)	Unambiguous	TPFNFKPGGGGSYPYDVPDYA		2	CCAB	CCAB; CCAB	0	2	0.7391	0	1	1	1125.01	2249.02	2249.02	-0.61	-0.00068	CID (Collision Induced Dissociation)	MS2	7.4897	22.384	46.2328	11893	CCAB-2b-2.raw	F589	3.68	1
FALSE	High	Sequest HT (A2)	Unambiguous	AQQWYAQQSPDFR		2	CCAB	CCAB; CCAB	0	2	0.7248	0	1	1	812.877	1624.75	1624.75	-2.15	-0.00175	CID (Collision Induced Dissociation)	MS2	45.2678	134.486	37.5269	5829	CCAB-3a3.raw	F594	3.67	1
FALSE	High	Sequest HT (A2)	Unambiguous	YLWTETHPLDDLPR		2	CCAB	CCAB; CCAB	0	2	0.6027	0	1	1	878.435	1755.86	1755.87	-4.45	-0.0039	CID (Collision Induced Dissociation)	MS2	89.0139	114.954	39.9345	9545	CCAB-11b.raw	F627	3.65	1
FALSE	High	Sequest HT (A2)	Unambiguous	LmSENDDLTLER	M2(Oxidation)	2	CCAB	CCAB; CCAB	0	2	0.5397	0	1	1	726.334	1451.66	1451.67	-4.71	-0.00342	CID (Collision Induced Dissociation)	MS2	50.4741	13.378	28.4264	4077	CCAB-8b.raw	F610	3.65	1
FALSE	High	Sequest HT (A2)	Unambiguous	LmNFLYVASPGR	M2(Oxidation)	2	CCAB	CCAB; CCAB	0	2	0.6082	0	1	1	692.359	1383.71	1383.71	1.11	0.00077	CID (Collision Induced Dissociation)	MS2	34.8675	80.087	43.2148	7703	CCAB-3a1.raw	F590	3.65	1
FALSE	High	Sequest HT (A2)	Unambiguous	LmNFLYVASPGR	M2(Oxidation)	2	CCAB	CCAB; CCAB	0	2	0.6278	0	1	1	692.359	1383.71	1383.71	0.61	0.00042	CID (Collision Induced Dissociation)	MS2	40.8066	150	43.4637	6925	CCAB-4a1.raw	F596	3.6	1
FALSE	High	Sequest HT (A2)	Unambiguous	LMSENDDLTLER		2	CCAB	CCAB; CCAB	0	2	0.5738	0	1	1	718.339	1435.67	1435.67	-1.79	-0.00129	CID (Collision Induced Dissociation)	MS2	46.0952	33.516	36.6568	6727	CCAB-2b.raw	F588	3.59	1
FALSE	High	Sequest HT (A2)	Unambiguous	LmNFLYVASPGR	M2(Oxidation)	2	CCAB	CCAB; CCAB	0	2	0.5281	0	1	1	692.36	1383.71	1383.71	2.66	0.00184	CID (Collision Induced Dissociation)	MS2	35.3121	150	34.5502	5174	CCAB-8a.raw	F608	3.56	1
FALSE	High	Sequest HT (A2)	Unambiguous	ANLDAFAAGINAYAQQNPDDISPEVR		2	CCAB	CCAB; CCAB	0	3	0.6394	0	1	1	920.779	2760.32	2760.32	-0.31	-0.00028	CID (Collision Induced Dissociation)	MS2	19.8426	150	47.3403	7834	CCAB-4a1.raw	F596	3.55	1
FALSE	High	Sequest HT (A2)	Unambiguous	MGITNTVNGMVGATNYR		2	CCAB	CCAB; CCAB	0	2	0.7265	0	1	1	899.929	1798.85	1798.86	-3.74	-0.00336	CID (Collision Induced Dissociation)	MS2	44.8203	129.107	36.9156	8329	CCAB-11b.raw	F627	3.51	1
FALSE	High	Sequest HT (A2)	Unambiguous	LmNFLYVASPGR	M2(Oxidation)	2	CCAB	CCAB; CCAB	0	2	0.6406	0	1	1	692.356	1383.71	1383.71	-2.5	-0.00173	CID (Collision Induced Dissociation)	MS2	30.4664	25.375	40.7643	8954	CCAB6-a2.raw	F644	3.45	1
FALSE	High	Sequest HT (A2)	Unambiguous	LmNFLYVASPGR	M2(Oxidation)	2	CCAB	CCAB; CCAB	0	2	0.5291	0	1	1	692.358	1383.71	1383.71	-0.66	-0.00046	CID (Collision Induced Dissociation)	MS2	13.923	144.69	43.626	7805	CCAB-4a3-2.raw	F601	3.44	1
FALSE	High	Sequest HT (A2)	Unambiguous	DFPSYLAPQTPHSLR		2	CCAB	CCAB; CCAB	0	2	0.6076	0	1	1	864.937	1728.87	1728.87	-2.56	-0.00221	CID (Collision Induced Dissociation)	MS2	43.3346	8.779	37.2189	11278	CCAB-11b2.raw	F628	3.44	1
FALSE	High	Sequest HT (A2)	Unambiguous	AQQWYAQQSPDFR		2	CCAB	CCAB; CCAB	0	3	0.6176	0	1	1	542.255	1624.75	1624.75	0.17	9e-05	CID (Collision Induced Dissociation)	MS2	22.5195	150	37.7836	4789	CCAB-4a3.raw	F600	3.4	1
FALSE	High	Sequest HT (A2)	Unambiguous	LmNFLYVASPGR	M2(Oxidation)	2	CCAB	CCAB; CCAB	0	2	0.5163	0	1	1	692.357	1383.71	1383.71	-1.17	-0.00081	CID (Collision Induced Dissociation)	MS2	59.6617	73.125	43.5938	9285	CCAB-2a3-2.raw	F587	3.37	1
FALSE	High	Sequest HT (A2)	Unambiguous	TPFNFKPGGGGSYPYDVPDYA		2	CCAB	CCAB; CCAB	0	2	0.7679	0	1	1	1125.01	2249.02	2249.02	0.73	0.00082	CID (Collision Induced Dissociation)	MS2	23.5408	81.123	45.7613	10404	CCAB-2b.raw	F588	3.36	1
FALSE	High	Sequest HT (A2)	Unambiguous	ANLDAFAAGINAYAQQNPDDISPEVR		2	CCAB	CCAB; CCAB	0	3	0.5701	0	1	1	920.778	2760.32	2760.32	-0.9	-0.00083	CID (Collision Induced Dissociation)	MS2	16.0209	150	47.584	10290	CCAB-3a3-2.raw	F595	3.35	1
FALSE	High	Sequest HT (A2)	Unambiguous	LmSENDDLTLER	M2(Oxidation)	2	CCAB	CCAB; CCAB	0	2	0.5701	0	1	1	726.335	1451.66	1451.67	-3.93	-0.00285	CID (Collision Induced Dissociation)	MS2	57.9398	15.879	30.6797	8154	CCAB-11b2.raw	F628	3.28	1
FALSE	High	Sequest HT (A2)	Unambiguous	AQQWYAQQSPDFR		2	CCAB	CCAB; CCAB	0	2	0.6616	0	1	1	812.878	1624.75	1624.75	-1.56	-0.00127	CID (Collision Induced Dissociation)	MS2	50.2783	150	37.6335	5732	CCAB-3a2.raw	F592	3.28	1
FALSE	High	Sequest HT (A2)	Unambiguous	LmNFLYVASPGR	M2(Oxidation)	2	CCAB	CCAB; CCAB	0	2	0.5849	0	1	1	692.358	1383.71	1383.71	-0.48	-0.00034	CID (Collision Induced Dissociation)	MS2	32.7994	61.745	43.7826	8258	CCAB-4a1-2.raw	F597	3.18	1
FALSE	High	Sequest HT (A2)	Unambiguous	LmSENDDLTLER	M2(Oxidation)	2	CCAB	CCAB; CCAB	0	2	0.4525	0	1	1	726.341	1451.67	1451.67	4.43	0.00321	CID (Collision Induced Dissociation)	MS2	18.556	19.755	33.4526	6137	CCAB-2b-2.raw	F589	3.16	1
FALSE	High	Sequest HT (A2)	Unambiguous	LMNFLYVASPGR		2	CCAB	CCAB; CCAB	0	2	0.3758	0	1	1	684.36	1367.71	1367.71	-1.24	-0.00085	CID (Collision Induced Dissociation)	MS2	30.8889	150	48.5865	10008	CCAB-3a2-2.raw	F593	3.14	1
FALSE	High	Sequest HT (A2)	Unambiguous	ANLDAFAAGINAYAQQNPDDISPEVR		2	CCAB	CCAB; CCAB	0	3	0.5335	0	1	1	920.781	2760.33	2760.32	2.09	0.00192	CID (Collision Induced Dissociation)	MS2	12.7125	150	47.5369	10277	CCAB-3a3-2.raw	F595	3.13	1
FALSE	High	Sequest HT (A2)	Unambiguous	ANLDAFAAGINAYAQQNPDDISPEVR		2	CCAB	CCAB; CCAB	0	3	0.5788	0	1	1	920.78	2760.33	2760.32	1.43	0.00131	CID (Collision Induced Dissociation)	MS2	20.9934	150	47.1914	8425	CCAB-4a2.raw	F598	3.11	1
FALSE	High	Sequest HT (A2)	Unambiguous	AQQWYAQQSPDFR		2	CCAB	CCAB; CCAB	0	3	0.5032	0	1	1	542.255	1624.75	1624.75	-0.52	-0.00028	CID (Collision Induced Dissociation)	MS2	44.965	73.55	37.6094	5852	CCAB-3a3.raw	F594	3.1	1
FALSE	High	Sequest HT (A2)	Unambiguous	AALLFEEWAR		2	CCAB	CCAB; CCAB	0	2	0.5097	0	1	1	603.322	1205.64	1205.63	3.74	0.00226	CID (Collision Induced Dissociation)	MS2	51.6481	30.345	37.8596	7661	CCAB-8b.raw	F610	3.1	1
FALSE	High	Sequest HT (A2)	Unambiguous	LmNFLYVASPGR	M2(Oxidation)	2	CCAB	CCAB; CCAB	0	2	0.5405	0	1	1	692.357	1383.71	1383.71	-1.33	-0.00092	CID (Collision Induced Dissociation)	MS2	58.3791	150	43.9887	8804	CCAB-3a2-2.raw	F593	3.09	1
FALSE	High	Sequest HT (A2)	Unambiguous	MILNDVNVPGAAGYGNLGSFR		2	CCAB	CCAB; CCAB	0	3	0.4545	0	1	1	722.366	2165.08	2165.08	1.6	0.00115	CID (Collision Induced Dissociation)	MS2	82.6556	33.255	47.7834	11151	CCAB-2b.raw	F588	3.08	1
FALSE	High	Sequest HT (A2)	Unambiguous	QADGTTVDKPLEIR		2	CCAB	CCAB; CCAB	0	2	0.5065	0	1	1	771.908	1542.81	1542.81	-2.74	-0.00212	CID (Collision Induced Dissociation)	MS2	22.4901	41.807	32.9087	5211	CCAB-2b.raw	F588	3.08	1
FALSE	High	Sequest HT (A2)	Unambiguous	LMNFLYVASPGR		2	CCAB	CCAB; CCAB	0	2	0.3214	0	1	1	684.36	1367.71	1367.71	-0.47	-0.00032	CID (Collision Induced Dissociation)	MS2	54.4408	50.44	48.3134	10984	CCAB-3a1-2.raw	F591	3.08	1
FALSE	High	Sequest HT (A2)	Unambiguous	DFPSYLAPQTPHSLR		2	CCAB	CCAB; CCAB	0	2	0.6013	0	1	1	864.939	1728.87	1728.87	0.5	0.00043	CID (Collision Induced Dissociation)	MS2	25.6466	40.903	41.2568	8615	CCAB-2b.raw	F588	3.06	1
FALSE	High	Sequest HT (A2)	Unambiguous	LMNFLYVASPGR		2	CCAB	CCAB; CCAB	0	2	0.2171	0	1	1	684.361	1367.71	1367.71	-0.17	-0.00012	CID (Collision Induced Dissociation)	MS2	59.8175	150	47.7533	8433	CCAB-3a3.raw	F594	3.04	1
FALSE	High	Sequest HT (A2)	Unambiguous	LMNFLYVASPGR		2	CCAB	CCAB; CCAB	0	2	0.3828	0	1	1	684.361	1367.71	1367.71	0.39	0.00027	CID (Collision Induced Dissociation)	MS2	59.6205	150	47.6007	8793	CCAB-3a1.raw	F590	3.03	1
FALSE	High	Sequest HT (A2)	Unambiguous	REQVEAAVQER		2	CCAB	CCAB; CCAB	1	2	0.4667	0	1	1	657.84	1314.67	1314.68	-2.34	-0.00154	CID (Collision Induced Dissociation)	MS2	25.9038	39.976	23.4881	4758	CCAB-11b2.raw	F628	3	1
FALSE	High	Sequest HT (A2)	Unambiguous	MILNDVNVPGAAGYGNLGSFR		2	CCAB	CCAB; CCAB	0	3	0.5912	0	1	1	722.364	2165.08	2165.08	-1.9	-0.00137	CID (Collision Induced Dissociation)	MS2	32.0821	2.773	43.6992	14278	CCAB-11b2.raw	F628	2.96	1
FALSE	High	Sequest HT (A2)	Unambiguous	MILNDVNVPGAAGYGNLGSFR		2	CCAB	CCAB; CCAB	0	2	0.5777	0	1	1	1083.04	2165.08	2165.08	-0.76	-0.00082	CID (Collision Induced Dissociation)	MS2	8.28227	33.5	42.7631	10634	CCAB-11b.raw	F627	2.96	1
FALSE	High	Sequest HT (A2)	Unambiguous	LMSENDDLTLER		2	CCAB	CCAB; CCAB	0	2	0.6122	0	1	1	718.339	1435.67	1435.67	-1.68	-0.00121	CID (Collision Induced Dissociation)	MS2	46.7529	15.189	36.5391	7526	CCAB-2b-2.raw	F589	2.94	1
FALSE	High	Sequest HT (A2)	Unambiguous	QPGTTHYSDQIER		2	CCAB	CCAB; CCAB	0	2	0.6894	0	1	1	766.36	1531.71	1531.71	-0.59	-0.00046	CID (Collision Induced Dissociation)	MS2	64.0875	87.256	24.6613	5284	CCAB-11b2.raw	F628	2.93	1
FALSE	High	Sequest HT (A2)	Unambiguous	LTLQDGGYLYDGQVRPFER		2	CCAB	CCAB; CCAB	0	3	0.4664	0	1	1	743.042	2227.11	2227.11	-0.91	-0.00067	CID (Collision Induced Dissociation)	MS2	15.3328	1.084	39.4384	12319	CCAB-11b2.raw	F628	2.83	1
FALSE	High	Sequest HT (A2)	Unambiguous	ANLDAFAAGINAYAQQNPDDISPEVR		2	CCAB	CCAB; CCAB	0	3	0.4912	0	1	1	920.777	2760.32	2760.32	-2.02	-0.00186	CID (Collision Induced Dissociation)	MS2	8.1262	150	47.1585	8294	CCAB-3a3.raw	F594	2.83	1
FALSE	High	Sequest HT (A2)	Unambiguous	QADGTTVDKPLEIR		2	CCAB	CCAB; CCAB	0	2	0.4397	0	1	1	771.912	1542.82	1542.81	2.5	0.00193	CID (Collision Induced Dissociation)	MS2	53.8256	76.645	28.9378	5052	CCAB-11b.raw	F627	2.82	1
FALSE	High	Sequest HT (A2)	Unambiguous	AQQWYAQQSPDFR		2	CCAB	CCAB; CCAB	0	2	0.5071	0	1	1	812.881	1624.76	1624.75	3.33	0.00271	CID (Collision Induced Dissociation)	MS2	89.0832	138.979	33.226	6060	CCAB-11a.raw	F623	2.82	1
FALSE	High	Sequest HT (A2)	Unambiguous	LLAAWDREFTSDSR		2	CCAB	CCAB; CCAB	1	3	0.6354	0	1	1	556.277	1666.82	1666.82	-1.47	-0.00081	CID (Collision Induced Dissociation)	MS2	51.7654	44.934	41.6843	8789	CCAB-2b.raw	F588	2.77	1
FALSE	High	Sequest HT (A2)	Unambiguous	QADGTTVDKPLEIR		2	CCAB	CCAB; CCAB	0	3	0.3926	0	1	1	514.942	1542.81	1542.81	-0.1	-5e-05	CID (Collision Induced Dissociation)	MS2	25.7412	4.167	33.0374	5958	CCAB-2b-2.raw	F589	2.7	1
FALSE	High	Sequest HT (A2)	Unambiguous	LMSENDDLTLER		2	CCAB	CCAB; CCAB	0	2	0.6074	0	1	1	718.339	1435.67	1435.67	-1.74	-0.00125	CID (Collision Induced Dissociation)	MS2	42.6673	10.124	32.913	6687	CCAB-11b.raw	F627	2.7	1
FALSE	High	Sequest HT (A2)	Unambiguous	VFTWSDPDENGVR		2	CCAB	CCAB; CCAB	0	2	0.5774	0	1	1	761.35	1521.69	1521.7	-2.38	-0.00181	CID (Collision Induced Dissociation)	MS2	54.2416	16.774	35.8562	7901	CCAB-11b.raw	F627	2.65	1
FALSE	High	Sequest HT (A2)	Unambiguous	DFPSYLAPQTPHSLR		2	CCAB	CCAB; CCAB	0	2	0.5227	0	1	1	864.944	1728.88	1728.87	5.97	0.00516	CID (Collision Induced Dissociation)	MS2	87.7563	118.738	36.5037	8160	CCAB-11b.raw	F627	2.64	1
FALSE	High	Sequest HT (A2)	Unambiguous	EQVEAAVQER		2	CCAB	CCAB; CCAB	0	2	0.3985	0	1	1	579.791	1158.57	1158.57	0.03	2e-05	CID (Collision Induced Dissociation)	MS2	49.4297	135.986	24.0427	3308	CCAB-11b.raw	F627	2.61	1
FALSE	High	Sequest HT (A2)	Unambiguous	YLWTETHPLDDLPR		2	CCAB	CCAB; CCAB	0	2	0.4015	0	1	1	878.438	1755.87	1755.87	-0.97	-0.00085	CID (Collision Induced Dissociation)	MS2	40.5653	11.643	40.4527	12797	CCAB-11b2.raw	F628	2.59	1
FALSE	High	Sequest HT (A2)	Unambiguous	LMSENDDLTLER		2	CCAB	CCAB; CCAB	0	2	0.3976	0	1	1	718.341	1435.68	1435.67	1.44	0.00104	CID (Collision Induced Dissociation)	MS2	48.4734	150	30.3946	5479	CCAB-1b.raw	F580	2.54	1
FALSE	High	Sequest HT (A2)	Unambiguous	YLWTETHPLDDLPR		2	CCAB	CCAB; CCAB	0	3	0.6457	0	1	1	585.959	1755.86	1755.87	-4.75	-0.00278	CID (Collision Induced Dissociation)	MS2	63.4154	55.256	35.8831	6984	CCAB-8b.raw	F610	2.54	1
FALSE	High	Sequest HT (A2)	Unambiguous	EQVEAAVQER		2	CCAB	CCAB; CCAB	0	2	0.4643	0	1	1	579.791	1158.57	1158.57	-0.39	-0.00023	CID (Collision Induced Dissociation)	MS2	46.7609	127.292	45.1846	5634	CCAB-11ab.raw	F625	2.52	1
FALSE	High	Sequest HT (A2)	Unambiguous	LFAGQNFAGQAGFATPWSLDKPVSTPYGLR		2	CCAB	CCAB; CCAB	0	3	0.5378	0	1	1	1066.21	3196.61	3196.62	-2.71	-0.00289	CID (Collision Induced Dissociation)	MS2	6.82632	52.116	46.7113	12101	CCAB-11b.raw	F627	2.51	1
FALSE	High	Sequest HT (A2)	Unambiguous	EQVEAAVQER		2	CCAB	CCAB; CCAB	0	2	0.468	0	1	1	579.79	1158.57	1158.57	-1.39	-0.0008	CID (Collision Induced Dissociation)	MS2	71.4891	150	26.1173	3526	CCAB-2b-2.raw	F589	2.5	1
FALSE	High	Sequest HT (A2)	Unambiguous	TPFNFKPGGGGSYPYDVPDYA		2	CCAB	CCAB; CCAB	0	2	0.744	0	1	1	1125.01	2249.02	2249.02	1.51	0.0017	CID (Collision Induced Dissociation)	MS2	47.6629	63.846	41.0269	9966	CCAB-11b.raw	F627	2.5	1
FALSE	High	Sequest HT (A2)	Unambiguous	LMSENDDLTLER		2	CCAB	CCAB; CCAB	0	2	0.5502	0	1	1	718.34	1435.67	1435.67	-0.99	-0.00071	CID (Collision Induced Dissociation)	MS2	23.8136	32.573	33.0544	6746	CCAB-11b.raw	F627	2.49	1
FALSE	High	Sequest HT (A2)	Unambiguous	AQQWYAQQSPDFR		2	CCAB	CCAB; CCAB	0	3	0.6371	0	1	1	542.255	1624.75	1624.75	0.07	4e-05	CID (Collision Induced Dissociation)	MS2	47.2278	38.255	37.682	6412	CCAB-4a1-2.raw	F597	2.48	1
FALSE	High	Sequest HT (A2)	Unambiguous	TLPDLIPAALIDPDPEVQAAAR		2	CCAB	CCAB; CCAB	0	3	0.3852	0	1	1	762.749	2286.23	2286.23	-0.61	-0.00047	CID (Collision Induced Dissociation)	MS2	28.1306	7.975	50.1009	12129	CCAB-2b.raw	F588	2.44	1
FALSE	High	Sequest HT (A2)	Unambiguous	EQVEAAVQER		2	CCAB	CCAB; CCAB	0	2	0.5123	0	1	1	579.793	1158.58	1158.57	2.67	0.00155	CID (Collision Induced Dissociation)	MS2	70.0641	150	44.4194	5447	CCAB-11ab.raw	F625	2.44	1
FALSE	High	Sequest HT (A2)	Unambiguous	VFTWSDPDENGVR		2	CCAB	CCAB; CCAB	0	2	0.5205	0	1	1	761.352	1521.7	1521.7	0.44	0.00034	CID (Collision Induced Dissociation)	MS2	56.4991	7.451	36.09	10747	CCAB-11b2.raw	F628	2.44	1
FALSE	High	Sequest HT (A2)	Unambiguous	QPGTTHYSDQIER		2	CCAB	CCAB; CCAB	0	3	0.4184	0	1	1	511.241	1531.71	1531.71	-2.64	-0.00135	CID (Collision Induced Dissociation)	MS2	77.4579	39.732	24.5947	2580	CCAB-8b.raw	F610	2.39	1
FALSE	High	Sequest HT (A2)	Unambiguous	EQVEAAVQER		2	CCAB	CCAB; CCAB	0	2	0.3755	0	1	1	579.792	1158.58	1158.57	1.49	0.00086	CID (Collision Induced Dissociation)	MS2	62.9497	116.978	45.9487	5825	CCAB-11ab.raw	F625	2.29	1
FALSE	High	Sequest HT (A2)	Unambiguous	LTLQDGGYLYDGQVRPFER		2	CCAB	CCAB; CCAB	0	2	0.3102	0	1	1	1114.06	2227.11	2227.11	-3.43	-0.00381	CID (Collision Induced Dissociation)	MS2	48.7115	15.114	39.4204	12313	CCAB-11b2.raw	F628	2.16	1
CCAB	alpha subunit	30	3	31	3	171	18.8	6.35	108.16	3	High	Not Found	Not Found	High	Not Found	Not Found	High	High	High	High	High	High	High	High	High	High	High	High	High	Not Found	Not Found	High	High	Not Found	Not Found	Not Found	Not Found	Not Found	Not Found	Not Found	Not Found	Not Found	Not Found	Not Found	Not Found	Not Found	Not Found	High	1
Protein Group ID	# Proteins	# Unique Peptides	# Peptides	# PSMs	Group Description	Found in Sample: [S578] F578: Sample, alpha, CCAB-1	Found in Sample: [S579] F579: Sample, precursor, CCAB-1	Found in Sample: [S580] F580: Sample, beta, CCAB-1	Found in Sample: [S587] F587: Sample, alpha, CCAB-2	Found in Sample: [S588] F588: Sample, beta, CCAB-2	Found in Sample: [S589] F589: Sample, beta, CCAB-2	Found in Sample: [S590] F590: Sample, alpha, CCAB-3	Found in Sample: [S591] F591: Sample, alpha, CCAB-3	Found in Sample: [S592] F592: Sample, alpha, CCAB-3	Found in Sample: [S593] F593: Sample, alpha, CCAB-3	Found in Sample: [S594] F594: Sample, alpha, CCAB-3	Found in Sample: [S595] F595: Sample, alpha, CCAB-3	Found in Sample: [S596] F596: Sample, alpha, CCAB-4	Found in Sample: [S597] F597: Sample, alpha, CCAB-4	Found in Sample: [S598] F598: Sample, alpha, CCAB-4	Found in Sample: [S599] F599: Sample, alpha, CCAB-4	Found in Sample: [S600] F600: Sample, alpha, CCAB-4	Found in Sample: [S601] F601: Sample, alpha, CCAB-4	Found in Sample: [S608] F608: Sample, alpha, CCAB-8	Found in Sample: [S609] F609: Sample, precursor, CCAB-8	Found in Sample: [S610] F610: Sample, beta, CCAB-8	Found in Sample: [S623] F623: Sample, alpha, CCAB-11	Found in Sample: [S624] F624: Sample, alpha, CCAB-11	Found in Sample: [S625] F625: Sample, precursor, CCAB-11	Found in Sample: [S626] F626: Sample, precursor, CCAB-11	Found in Sample: [S627] F627: Sample, beta, CCAB-11	Found in Sample: [S628] F628: Sample, beta, CCAB-11	Found in Sample: [S629] F629: Sample, alpha, wild-type b	Found in Sample: [S630] F630: Sample, alpha, wild-type b	Found in Sample: [S631] F631: Sample, precursor, wild-type b	Found in Sample: [S632] F632: Sample, precursor, wild-type b	Found in Sample: [S633] F633: Sample, beta, wild-type b	Found in Sample: [S634] F634: Sample, beta, wild-type b	Found in Sample: [S635] F635: Sample, alpha, wild-type a	Found in Sample: [S636] F636: Sample, precursor, wild-type a	Found in Sample: [S637] F637: Sample, beta, wild-type a	Found in Sample: [S643] F643: Sample, alpha, CCAB-6	Found in Sample: [S644] F644: Sample, alpha, CCAB-6
1153	3	20	20	78	[Master Protein] Precursor (full protein)	High	Not Found	High	High	High	High	High	High	High	High	High	High	High	High	High	High	High	High	High	Not Found	High	High	High	High	Not Found	High	High	Not Found	Not Found	Not Found	Not Found	Not Found	Not Found	Not Found	Not Found	Not Found	Not Found	High
Checked	Confidence	Identifying Node	PSM Ambiguity	Annotated Sequence	Modifications	# Proteins	Master Protein Accessions	Protein Accessions	# Missed Cleavages	Charge	DeltaScore	DeltaCn	Rank	Search Engine Rank	m/z [Da]	MH+ [Da]	Theo. MH+ [Da]	DeltaM [ppm]	Deltam/z [Da]	Activation Type	MS Order	Isolation Interference [%]	Ion Inject Time [ms]	RT [min]	First Scan	Spectrum File	File ID	XCorr	# Protein Groups
FALSE	High	Sequest HT (A2)	Unambiguous	RAEGDIAFWQGLVPGDSSR		2	CCAB	CCAB; CCAB	1	2	0.628	0	1	1	1031.01	2061.01	2061.01	-0.31	-0.00032	CID (Collision Induced Dissociation)	MS2	39.3532	23.713	43.3006	14096	CCAB-11b2.raw	F628	4.92	1
FALSE	High	Sequest HT (A2)	Unambiguous	TLPDLIPAALIDPDPEVQAAAR		2	CCAB	CCAB; CCAB	0	2	0.6749	0	1	1	1143.61	2286.22	2286.23	-6.79	-0.00776	CID (Collision Induced Dissociation)	MS2	61.235	82.029	41.5429	8654	CCAB-8b.raw	F610	4.86	1
FALSE	High	Sequest HT (A2)	Unambiguous	ANLDAFAAGINAYAQQNPDDISPEVR		2	CCAB	CCAB; CCAB	0	3	0.7101	0	1	1	920.774	2760.31	2760.32	-5.12	-0.00471	CID (Collision Induced Dissociation)	MS2	11.1873	16.572	42.8484	13198	CCAB-11a2.raw	F624	4.76	1
FALSE	High	Sequest HT (A2)	Unambiguous	AQQWYAQQSPDFR		2	CCAB	CCAB; CCAB	0	2	0.6718	0	1	1	812.877	1624.75	1624.75	-2.27	-0.00184	CID (Collision Induced Dissociation)	MS2	18.9342	40.669	37.6595	7066	CCAB-3a3-2.raw	F595	4.57	1
FALSE	High	Sequest HT (A2)	Unambiguous	TLPDLIPAALIDPDPEVQAAAR		2	CCAB	CCAB; CCAB	0	3	0.6523	0	1	1	762.751	2286.24	2286.23	1.56	0.00119	CID (Collision Induced Dissociation)	MS2	8.19664	12.764	41.531	8650	CCAB-8b.raw	F610	4.4	1
FALSE	High	Sequest HT (A2)	Unambiguous	ANLDAFAAGINAYAQQNPDDISPEVR		2	CCAB	CCAB; CCAB	0	3	0.7086	0	1	1	920.777	2760.32	2760.32	-2.31	-0.00213	CID (Collision Induced Dissociation)	MS2	9.70957	150	47.0688	8668	CCAB-3a1.raw	F590	4.29	1
FALSE	High	Sequest HT (A2)	Unambiguous	MILNDVNVPGAAGYGNLGSFR		2	CCAB	CCAB; CCAB	0	2	0.6323	0	1	1	1083.04	2165.08	2165.08	-2.57	-0.00278	CID (Collision Induced Dissociation)	MS2	29.305	10	43.6555	14258	CCAB-11b2.raw	F628	4.27	1
FALSE	High	Sequest HT (A2)	Unambiguous	ANLDAFAAGINAYAQQNPDDISPEVR		2	CCAB	CCAB; CCAB	0	3	0.5012	0	1	1	920.78	2760.32	2760.32	0.71	0.00065	CID (Collision Induced Dissociation)	MS2	21.6088	52.189	47.2817	10879	CCAB-4a2-2.raw	F599	4.25	1
FALSE	High	Sequest HT (A2)	Unambiguous	mILNDVNVPGAAGYGNLGSFR	M1(Oxidation)	2	CCAB	CCAB; CCAB	0	3	0.6794	0	1	1	727.703	2181.09	2181.08	8.03	0.00584	CID (Collision Induced Dissociation)	MS2	72.7616	17.58	35.9042	6991	CCAB-8b.raw	F610	4.18	1
FALSE	High	Sequest HT (A2)	Unambiguous	ANLDAFAAGINAYAQQNPDDISPEVR		2	CCAB	CCAB; CCAB	0	3	0.5463	0	1	1	920.78	2760.33	2760.32	1.22	0.00112	CID (Collision Induced Dissociation)	MS2	76.2603	28.117	47.4831	10750	CCAB-3a1-2.raw	F591	4.1	1
FALSE	High	Sequest HT (A2)	Unambiguous	TPFNFKPGGGGSYPYDVPDYA		2	CCAB	CCAB; CCAB	0	2	0.7995	0	1	1	1125.01	2249.02	2249.02	-0.86	-0.00097	CID (Collision Induced Dissociation)	MS2	26.9928	5.809	41.9105	13456	CCAB-11b2.raw	F628	4.09	1
FALSE	High	Sequest HT (A2)	Unambiguous	AQQWYAQQSPDFR		2	CCAB	CCAB; CCAB	0	2	0.6732	0	1	1	812.879	1624.75	1624.75	0.08	6e-05	CID (Collision Induced Dissociation)	MS2	7.48558	37.593	37.2025	6068	CCAB-3a1.raw	F590	4.07	1
FALSE	High	Sequest HT (A2)	Unambiguous	MGITNTVNGMVGATNYR		2	CCAB	CCAB; CCAB	0	2	0.698	0	1	1	899.93	1798.85	1798.86	-2.18	-0.00196	CID (Collision Induced Dissociation)	MS2	67.5255	22.113	37.1802	11261	CCAB-11b2.raw	F628	4.04	1
FALSE	High	Sequest HT (A2)	Unambiguous	AQQWYAQQSPDFR		2	CCAB	CCAB; CCAB	0	2	0.7275	0	1	1	812.879	1624.75	1624.75	0.45	0.00037	CID (Collision Induced Dissociation)	MS2	38.4706	150	37.7098	4772	CCAB-4a3.raw	F600	3.89	1
FALSE	High	Sequest HT (A2)	Unambiguous	ANLDAFAAGINAYAQQNPDDISPEVR		2	CCAB	CCAB; CCAB	0	3	0.5736	0	1	1	920.78	2760.33	2760.32	1.01	0.00093	CID (Collision Induced Dissociation)	MS2	24.2352	150	41.8837	6558	CCAB-1a.raw	F578	3.87	1
FALSE	High	Sequest HT (A2)	Unambiguous	TPFNFKPGGGGSYPYDVPDYA		2	CCAB	CCAB; CCAB	0	2	0.7391	0	1	1	1125.01	2249.02	2249.02	-0.61	-0.00068	CID (Collision Induced Dissociation)	MS2	7.4897	22.384	46.2328	11893	CCAB-2b-2.raw	F589	3.68	1
FALSE	High	Sequest HT (A2)	Unambiguous	AQQWYAQQSPDFR		2	CCAB	CCAB; CCAB	0	2	0.7248	0	1	1	812.877	1624.75	1624.75	-2.15	-0.00175	CID (Collision Induced Dissociation)	MS2	45.2678	134.486	37.5269	5829	CCAB-3a3.raw	F594	3.67	1
FALSE	High	Sequest HT (A2)	Unambiguous	YLWTETHPLDDLPR		2	CCAB	CCAB; CCAB	0	2	0.6027	0	1	1	878.435	1755.86	1755.87	-4.45	-0.0039	CID (Collision Induced Dissociation)	MS2	89.0139	114.954	39.9345	9545	CCAB-11b.raw	F627	3.65	1
FALSE	High	Sequest HT (A2)	Unambiguous	LmSENDDLTLER	M2(Oxidation)	2	CCAB	CCAB; CCAB	0	2	0.5397	0	1	1	726.334	1451.66	1451.67	-4.71	-0.00342	CID (Collision Induced Dissociation)	MS2	50.4741	13.378	28.4264	4077	CCAB-8b.raw	F610	3.65	1
FALSE	High	Sequest HT (A2)	Unambiguous	LmNFLYVASPGR	M2(Oxidation)	2	CCAB	CCAB; CCAB	0	2	0.6082	0	1	1	692.359	1383.71	1383.71	1.11	0.00077	CID (Collision Induced Dissociation)	MS2	34.8675	80.087	43.2148	7703	CCAB-3a1.raw	F590	3.65	1
FALSE	High	Sequest HT (A2)	Unambiguous	LmNFLYVASPGR	M2(Oxidation)	2	CCAB	CCAB; CCAB	0	2	0.6278	0	1	1	692.359	1383.71	1383.71	0.61	0.00042	CID (Collision Induced Dissociation)	MS2	40.8066	150	43.4637	6925	CCAB-4a1.raw	F596	3.6	1
FALSE	High	Sequest HT (A2)	Unambiguous	LMSENDDLTLER		2	CCAB	CCAB; CCAB	0	2	0.5738	0	1	1	718.339	1435.67	1435.67	-1.79	-0.00129	CID (Collision Induced Dissociation)	MS2	46.0952	33.516	36.6568	6727	CCAB-2b.raw	F588	3.59	1
FALSE	High	Sequest HT (A2)	Unambiguous	LmNFLYVASPGR	M2(Oxidation)	2	CCAB	CCAB; CCAB	0	2	0.5281	0	1	1	692.36	1383.71	1383.71	2.66	0.00184	CID (Collision Induced Dissociation)	MS2	35.3121	150	34.5502	5174	CCAB-8a.raw	F608	3.56	1
FALSE	High	Sequest HT (A2)	Unambiguous	ANLDAFAAGINAYAQQNPDDISPEVR		2	CCAB	CCAB; CCAB	0	3	0.6394	0	1	1	920.779	2760.32	2760.32	-0.31	-0.00028	CID (Collision Induced Dissociation)	MS2	19.8426	150	47.3403	7834	CCAB-4a1.raw	F596	3.55	1
FALSE	High	Sequest HT (A2)	Unambiguous	MGITNTVNGMVGATNYR		2	CCAB	CCAB; CCAB	0	2	0.7265	0	1	1	899.929	1798.85	1798.86	-3.74	-0.00336	CID (Collision Induced Dissociation)	MS2	44.8203	129.107	36.9156	8329	CCAB-11b.raw	F627	3.51	1
FALSE	High	Sequest HT (A2)	Unambiguous	LmNFLYVASPGR	M2(Oxidation)	2	CCAB	CCAB; CCAB	0	2	0.6406	0	1	1	692.356	1383.71	1383.71	-2.5	-0.00173	CID (Collision Induced Dissociation)	MS2	30.4664	25.375	40.7643	8954	CCAB6-a2.raw	F644	3.45	1
FALSE	High	Sequest HT (A2)	Unambiguous	LmNFLYVASPGR	M2(Oxidation)	2	CCAB	CCAB; CCAB	0	2	0.5291	0	1	1	692.358	1383.71	1383.71	-0.66	-0.00046	CID (Collision Induced Dissociation)	MS2	13.923	144.69	43.626	7805	CCAB-4a3-2.raw	F601	3.44	1
FALSE	High	Sequest HT (A2)	Unambiguous	DFPSYLAPQTPHSLR		2	CCAB	CCAB; CCAB	0	2	0.6076	0	1	1	864.937	1728.87	1728.87	-2.56	-0.00221	CID (Collision Induced Dissociation)	MS2	43.3346	8.779	37.2189	11278	CCAB-11b2.raw	F628	3.44	1
FALSE	High	Sequest HT (A2)	Unambiguous	AQQWYAQQSPDFR		2	CCAB	CCAB; CCAB	0	3	0.6176	0	1	1	542.255	1624.75	1624.75	0.17	9e-05	CID (Collision Induced Dissociation)	MS2	22.5195	150	37.7836	4789	CCAB-4a3.raw	F600	3.4	1
FALSE	High	Sequest HT (A2)	Unambiguous	LmNFLYVASPGR	M2(Oxidation)	2	CCAB	CCAB; CCAB	0	2	0.5163	0	1	1	692.357	1383.71	1383.71	-1.17	-0.00081	CID (Collision Induced Dissociation)	MS2	59.6617	73.125	43.5938	9285	CCAB-2a3-2.raw	F587	3.37	1
FALSE	High	Sequest HT (A2)	Unambiguous	TPFNFKPGGGGSYPYDVPDYA		2	CCAB	CCAB; CCAB	0	2	0.7679	0	1	1	1125.01	2249.02	2249.02	0.73	0.00082	CID (Collision Induced Dissociation)	MS2	23.5408	81.123	45.7613	10404	CCAB-2b.raw	F588	3.36	1
FALSE	High	Sequest HT (A2)	Unambiguous	ANLDAFAAGINAYAQQNPDDISPEVR		2	CCAB	CCAB; CCAB	0	3	0.5701	0	1	1	920.778	2760.32	2760.32	-0.9	-0.00083	CID (Collision Induced Dissociation)	MS2	16.0209	150	47.584	10290	CCAB-3a3-2.raw	F595	3.35	1
FALSE	High	Sequest HT (A2)	Unambiguous	LmSENDDLTLER	M2(Oxidation)	2	CCAB	CCAB; CCAB	0	2	0.5701	0	1	1	726.335	1451.66	1451.67	-3.93	-0.00285	CID (Collision Induced Dissociation)	MS2	57.9398	15.879	30.6797	8154	CCAB-11b2.raw	F628	3.28	1
FALSE	High	Sequest HT (A2)	Unambiguous	AQQWYAQQSPDFR		2	CCAB	CCAB; CCAB	0	2	0.6616	0	1	1	812.878	1624.75	1624.75	-1.56	-0.00127	CID (Collision Induced Dissociation)	MS2	50.2783	150	37.6335	5732	CCAB-3a2.raw	F592	3.28	1
FALSE	High	Sequest HT (A2)	Unambiguous	LmNFLYVASPGR	M2(Oxidation)	2	CCAB	CCAB; CCAB	0	2	0.5849	0	1	1	692.358	1383.71	1383.71	-0.48	-0.00034	CID (Collision Induced Dissociation)	MS2	32.7994	61.745	43.7826	8258	CCAB-4a1-2.raw	F597	3.18	1
FALSE	High	Sequest HT (A2)	Unambiguous	LmSENDDLTLER	M2(Oxidation)	2	CCAB	CCAB; CCAB	0	2	0.4525	0	1	1	726.341	1451.67	1451.67	4.43	0.00321	CID (Collision Induced Dissociation)	MS2	18.556	19.755	33.4526	6137	CCAB-2b-2.raw	F589	3.16	1
FALSE	High	Sequest HT (A2)	Unambiguous	LMNFLYVASPGR		2	CCAB	CCAB; CCAB	0	2	0.3758	0	1	1	684.36	1367.71	1367.71	-1.24	-0.00085	CID (Collision Induced Dissociation)	MS2	30.8889	150	48.5865	10008	CCAB-3a2-2.raw	F593	3.14	1
FALSE	High	Sequest HT (A2)	Unambiguous	ANLDAFAAGINAYAQQNPDDISPEVR		2	CCAB	CCAB; CCAB	0	3	0.5335	0	1	1	920.781	2760.33	2760.32	2.09	0.00192	CID (Collision Induced Dissociation)	MS2	12.7125	150	47.5369	10277	CCAB-3a3-2.raw	F595	3.13	1
FALSE	High	Sequest HT (A2)	Unambiguous	ANLDAFAAGINAYAQQNPDDISPEVR		2	CCAB	CCAB; CCAB	0	3	0.5788	0	1	1	920.78	2760.33	2760.32	1.43	0.00131	CID (Collision Induced Dissociation)	MS2	20.9934	150	47.1914	8425	CCAB-4a2.raw	F598	3.11	1
FALSE	High	Sequest HT (A2)	Unambiguous	AQQWYAQQSPDFR		2	CCAB	CCAB; CCAB	0	3	0.5032	0	1	1	542.255	1624.75	1624.75	-0.52	-0.00028	CID (Collision Induced Dissociation)	MS2	44.965	73.55	37.6094	5852	CCAB-3a3.raw	F594	3.1	1
FALSE	High	Sequest HT (A2)	Unambiguous	AALLFEEWAR		2	CCAB	CCAB; CCAB	0	2	0.5097	0	1	1	603.322	1205.64	1205.63	3.74	0.00226	CID (Collision Induced Dissociation)	MS2	51.6481	30.345	37.8596	7661	CCAB-8b.raw	F610	3.1	1
FALSE	High	Sequest HT (A2)	Unambiguous	LmNFLYVASPGR	M2(Oxidation)	2	CCAB	CCAB; CCAB	0	2	0.5405	0	1	1	692.357	1383.71	1383.71	-1.33	-0.00092	CID (Collision Induced Dissociation)	MS2	58.3791	150	43.9887	8804	CCAB-3a2-2.raw	F593	3.09	1
FALSE	High	Sequest HT (A2)	Unambiguous	MILNDVNVPGAAGYGNLGSFR		2	CCAB	CCAB; CCAB	0	3	0.4545	0	1	1	722.366	2165.08	2165.08	1.6	0.00115	CID (Collision Induced Dissociation)	MS2	82.6556	33.255	47.7834	11151	CCAB-2b.raw	F588	3.08	1
FALSE	High	Sequest HT (A2)	Unambiguous	QADGTTVDKPLEIR		2	CCAB	CCAB; CCAB	0	2	0.5065	0	1	1	771.908	1542.81	1542.81	-2.74	-0.00212	CID (Collision Induced Dissociation)	MS2	22.4901	41.807	32.9087	5211	CCAB-2b.raw	F588	3.08	1
FALSE	High	Sequest HT (A2)	Unambiguous	LMNFLYVASPGR		2	CCAB	CCAB; CCAB	0	2	0.3214	0	1	1	684.36	1367.71	1367.71	-0.47	-0.00032	CID (Collision Induced Dissociation)	MS2	54.4408	50.44	48.3134	10984	CCAB-3a1-2.raw	F591	3.08	1
FALSE	High	Sequest HT (A2)	Unambiguous	DFPSYLAPQTPHSLR		2	CCAB	CCAB; CCAB	0	2	0.6013	0	1	1	864.939	1728.87	1728.87	0.5	0.00043	CID (Collision Induced Dissociation)	MS2	25.6466	40.903	41.2568	8615	CCAB-2b.raw	F588	3.06	1
FALSE	High	Sequest HT (A2)	Unambiguous	LMNFLYVASPGR		2	CCAB	CCAB; CCAB	0	2	0.2171	0	1	1	684.361	1367.71	1367.71	-0.17	-0.00012	CID (Collision Induced Dissociation)	MS2	59.8175	150	47.7533	8433	CCAB-3a3.raw	F594	3.04	1
FALSE	High	Sequest HT (A2)	Unambiguous	LMNFLYVASPGR		2	CCAB	CCAB; CCAB	0	2	0.3828	0	1	1	684.361	1367.71	1367.71	0.39	0.00027	CID (Collision Induced Dissociation)	MS2	59.6205	150	47.6007	8793	CCAB-3a1.raw	F590	3.03	1
FALSE	High	Sequest HT (A2)	Unambiguous	REQVEAAVQER		2	CCAB	CCAB; CCAB	1	2	0.4667	0	1	1	657.84	1314.67	1314.68	-2.34	-0.00154	CID (Collision Induced Dissociation)	MS2	25.9038	39.976	23.4881	4758	CCAB-11b2.raw	F628	3	1
FALSE	High	Sequest HT (A2)	Unambiguous	MILNDVNVPGAAGYGNLGSFR		2	CCAB	CCAB; CCAB	0	3	0.5912	0	1	1	722.364	2165.08	2165.08	-1.9	-0.00137	CID (Collision Induced Dissociation)	MS2	32.0821	2.773	43.6992	14278	CCAB-11b2.raw	F628	2.96	1
FALSE	High	Sequest HT (A2)	Unambiguous	MILNDVNVPGAAGYGNLGSFR		2	CCAB	CCAB; CCAB	0	2	0.5777	0	1	1	1083.04	2165.08	2165.08	-0.76	-0.00082	CID (Collision Induced Dissociation)	MS2	8.28227	33.5	42.7631	10634	CCAB-11b.raw	F627	2.96	1
FALSE	High	Sequest HT (A2)	Unambiguous	LMSENDDLTLER		2	CCAB	CCAB; CCAB	0	2	0.6122	0	1	1	718.339	1435.67	1435.67	-1.68	-0.00121	CID (Collision Induced Dissociation)	MS2	46.7529	15.189	36.5391	7526	CCAB-2b-2.raw	F589	2.94	1
FALSE	High	Sequest HT (A2)	Unambiguous	QPGTTHYSDQIER		2	CCAB	CCAB; CCAB	0	2	0.6894	0	1	1	766.36	1531.71	1531.71	-0.59	-0.00046	CID (Collision Induced Dissociation)	MS2	64.0875	87.256	24.6613	5284	CCAB-11b2.raw	F628	2.93	1
FALSE	High	Sequest HT (A2)	Unambiguous	LTLQDGGYLYDGQVRPFER		2	CCAB	CCAB; CCAB	0	3	0.4664	0	1	1	743.042	2227.11	2227.11	-0.91	-0.00067	CID (Collision Induced Dissociation)	MS2	15.3328	1.084	39.4384	12319	CCAB-11b2.raw	F628	2.83	1
FALSE	High	Sequest HT (A2)	Unambiguous	ANLDAFAAGINAYAQQNPDDISPEVR		2	CCAB	CCAB; CCAB	0	3	0.4912	0	1	1	920.777	2760.32	2760.32	-2.02	-0.00186	CID (Collision Induced Dissociation)	MS2	8.1262	150	47.1585	8294	CCAB-3a3.raw	F594	2.83	1
FALSE	High	Sequest HT (A2)	Unambiguous	QADGTTVDKPLEIR		2	CCAB	CCAB; CCAB	0	2	0.4397	0	1	1	771.912	1542.82	1542.81	2.5	0.00193	CID (Collision Induced Dissociation)	MS2	53.8256	76.645	28.9378	5052	CCAB-11b.raw	F627	2.82	1
FALSE	High	Sequest HT (A2)	Unambiguous	AQQWYAQQSPDFR		2	CCAB	CCAB; CCAB	0	2	0.5071	0	1	1	812.881	1624.76	1624.75	3.33	0.00271	CID (Collision Induced Dissociation)	MS2	89.0832	138.979	33.226	6060	CCAB-11a.raw	F623	2.82	1
FALSE	High	Sequest HT (A2)	Unambiguous	LLAAWDREFTSDSR		2	CCAB	CCAB; CCAB	1	3	0.6354	0	1	1	556.277	1666.82	1666.82	-1.47	-0.00081	CID (Collision Induced Dissociation)	MS2	51.7654	44.934	41.6843	8789	CCAB-2b.raw	F588	2.77	1
FALSE	High	Sequest HT (A2)	Unambiguous	QADGTTVDKPLEIR		2	CCAB	CCAB; CCAB	0	3	0.3926	0	1	1	514.942	1542.81	1542.81	-0.1	-5e-05	CID (Collision Induced Dissociation)	MS2	25.7412	4.167	33.0374	5958	CCAB-2b-2.raw	F589	2.7	1
FALSE	High	Sequest HT (A2)	Unambiguous	LMSENDDLTLER		2	CCAB	CCAB; CCAB	0	2	0.6074	0	1	1	718.339	1435.67	1435.67	-1.74	-0.00125	CID (Collision Induced Dissociation)	MS2	42.6673	10.124	32.913	6687	CCAB-11b.raw	F627	2.7	1
FALSE	High	Sequest HT (A2)	Unambiguous	VFTWSDPDENGVR		2	CCAB	CCAB; CCAB	0	2	0.5774	0	1	1	761.35	1521.69	1521.7	-2.38	-0.00181	CID (Collision Induced Dissociation)	MS2	54.2416	16.774	35.8562	7901	CCAB-11b.raw	F627	2.65	1
FALSE	High	Sequest HT (A2)	Unambiguous	DFPSYLAPQTPHSLR		2	CCAB	CCAB; CCAB	0	2	0.5227	0	1	1	864.944	1728.88	1728.87	5.97	0.00516	CID (Collision Induced Dissociation)	MS2	87.7563	118.738	36.5037	8160	CCAB-11b.raw	F627	2.64	1
FALSE	High	Sequest HT (A2)	Unambiguous	EQVEAAVQER		2	CCAB	CCAB; CCAB	0	2	0.3985	0	1	1	579.791	1158.57	1158.57	0.03	2e-05	CID (Collision Induced Dissociation)	MS2	49.4297	135.986	24.0427	3308	CCAB-11b.raw	F627	2.61	1
FALSE	High	Sequest HT (A2)	Unambiguous	YLWTETHPLDDLPR		2	CCAB	CCAB; CCAB	0	2	0.4015	0	1	1	878.438	1755.87	1755.87	-0.97	-0.00085	CID (Collision Induced Dissociation)	MS2	40.5653	11.643	40.4527	12797	CCAB-11b2.raw	F628	2.59	1
FALSE	High	Sequest HT (A2)	Unambiguous	LMSENDDLTLER		2	CCAB	CCAB; CCAB	0	2	0.3976	0	1	1	718.341	1435.68	1435.67	1.44	0.00104	CID (Collision Induced Dissociation)	MS2	48.4734	150	30.3946	5479	CCAB-1b.raw	F580	2.54	1
FALSE	High	Sequest HT (A2)	Unambiguous	YLWTETHPLDDLPR		2	CCAB	CCAB; CCAB	0	3	0.6457	0	1	1	585.959	1755.86	1755.87	-4.75	-0.00278	CID (Collision Induced Dissociation)	MS2	63.4154	55.256	35.8831	6984	CCAB-8b.raw	F610	2.54	1
FALSE	High	Sequest HT (A2)	Unambiguous	EQVEAAVQER		2	CCAB	CCAB; CCAB	0	2	0.4643	0	1	1	579.791	1158.57	1158.57	-0.39	-0.00023	CID (Collision Induced Dissociation)	MS2	46.7609	127.292	45.1846	5634	CCAB-11ab.raw	F625	2.52	1
FALSE	High	Sequest HT (A2)	Unambiguous	LFAGQNFAGQAGFATPWSLDKPVSTPYGLR		2	CCAB	CCAB; CCAB	0	3	0.5378	0	1	1	1066.21	3196.61	3196.62	-2.71	-0.00289	CID (Collision Induced Dissociation)	MS2	6.82632	52.116	46.7113	12101	CCAB-11b.raw	F627	2.51	1
FALSE	High	Sequest HT (A2)	Unambiguous	EQVEAAVQER		2	CCAB	CCAB; CCAB	0	2	0.468	0	1	1	579.79	1158.57	1158.57	-1.39	-0.0008	CID (Collision Induced Dissociation)	MS2	71.4891	150	26.1173	3526	CCAB-2b-2.raw	F589	2.5	1
FALSE	High	Sequest HT (A2)	Unambiguous	TPFNFKPGGGGSYPYDVPDYA		2	CCAB	CCAB; CCAB	0	2	0.744	0	1	1	1125.01	2249.02	2249.02	1.51	0.0017	CID (Collision Induced Dissociation)	MS2	47.6629	63.846	41.0269	9966	CCAB-11b.raw	F627	2.5	1
FALSE	High	Sequest HT (A2)	Unambiguous	LMSENDDLTLER		2	CCAB	CCAB; CCAB	0	2	0.5502	0	1	1	718.34	1435.67	1435.67	-0.99	-0.00071	CID (Collision Induced Dissociation)	MS2	23.8136	32.573	33.0544	6746	CCAB-11b.raw	F627	2.49	1
FALSE	High	Sequest HT (A2)	Unambiguous	AQQWYAQQSPDFR		2	CCAB	CCAB; CCAB	0	3	0.6371	0	1	1	542.255	1624.75	1624.75	0.07	4e-05	CID (Collision Induced Dissociation)	MS2	47.2278	38.255	37.682	6412	CCAB-4a1-2.raw	F597	2.48	1
FALSE	High	Sequest HT (A2)	Unambiguous	TLPDLIPAALIDPDPEVQAAAR		2	CCAB	CCAB; CCAB	0	3	0.3852	0	1	1	762.749	2286.23	2286.23	-0.61	-0.00047	CID (Collision Induced Dissociation)	MS2	28.1306	7.975	50.1009	12129	CCAB-2b.raw	F588	2.44	1
FALSE	High	Sequest HT (A2)	Unambiguous	EQVEAAVQER		2	CCAB	CCAB; CCAB	0	2	0.5123	0	1	1	579.793	1158.58	1158.57	2.67	0.00155	CID (Collision Induced Dissociation)	MS2	70.0641	150	44.4194	5447	CCAB-11ab.raw	F625	2.44	1
FALSE	High	Sequest HT (A2)	Unambiguous	VFTWSDPDENGVR		2	CCAB	CCAB; CCAB	0	2	0.5205	0	1	1	761.352	1521.7	1521.7	0.44	0.00034	CID (Collision Induced Dissociation)	MS2	56.4991	7.451	36.09	10747	CCAB-11b2.raw	F628	2.44	1
FALSE	High	Sequest HT (A2)	Unambiguous	QPGTTHYSDQIER		2	CCAB	CCAB; CCAB	0	3	0.4184	0	1	1	511.241	1531.71	1531.71	-2.64	-0.00135	CID (Collision Induced Dissociation)	MS2	77.4579	39.732	24.5947	2580	CCAB-8b.raw	F610	2.39	1
FALSE	High	Sequest HT (A2)	Unambiguous	EQVEAAVQER		2	CCAB	CCAB; CCAB	0	2	0.3755	0	1	1	579.792	1158.58	1158.57	1.49	0.00086	CID (Collision Induced Dissociation)	MS2	62.9497	116.978	45.9487	5825	CCAB-11ab.raw	F625	2.29	1
FALSE	High	Sequest HT (A2)	Unambiguous	LTLQDGGYLYDGQVRPFER		2	CCAB	CCAB; CCAB	0	2	0.3102	0	1	1	1114.06	2227.11	2227.11	-3.43	-0.00381	CID (Collision Induced Dissociation)	MS2	48.7115	15.114	39.4204	12313	CCAB-11b2.raw	F628	2.16	1
ACRE_091300	ACRE_091300	9	1	1	1	198	21.4	7.61	2.33	1	Not Found	Not Found	Not Found	Not Found	Not Found	Not Found	Not Found	Not Found	Not Found	Not Found	Not Found	Not Found	Not Found	Not Found	Not Found	Not Found	Not Found	Not Found	Not Found	Not Found	Not Found	Not Found	Not Found	Not Found	Not Found	Not Found	High	Not Found	Not Found	Not Found	Not Found	Not Found	Not Found	Not Found	Not Found	Not Found	Not Found	Not Found	1
Protein Group ID	# Proteins	# Unique Peptides	# Peptides	# PSMs	Group Description	Found in Sample: [S578] F578: Sample, alpha, CCAB-1	Found in Sample: [S579] F579: Sample, precursor, CCAB-1	Found in Sample: [S580] F580: Sample, beta, CCAB-1	Found in Sample: [S587] F587: Sample, alpha, CCAB-2	Found in Sample: [S588] F588: Sample, beta, CCAB-2	Found in Sample: [S589] F589: Sample, beta, CCAB-2	Found in Sample: [S590] F590: Sample, alpha, CCAB-3	Found in Sample: [S591] F591: Sample, alpha, CCAB-3	Found in Sample: [S592] F592: Sample, alpha, CCAB-3	Found in Sample: [S593] F593: Sample, alpha, CCAB-3	Found in Sample: [S594] F594: Sample, alpha, CCAB-3	Found in Sample: [S595] F595: Sample, alpha, CCAB-3	Found in Sample: [S596] F596: Sample, alpha, CCAB-4	Found in Sample: [S597] F597: Sample, alpha, CCAB-4	Found in Sample: [S598] F598: Sample, alpha, CCAB-4	Found in Sample: [S599] F599: Sample, alpha, CCAB-4	Found in Sample: [S600] F600: Sample, alpha, CCAB-4	Found in Sample: [S601] F601: Sample, alpha, CCAB-4	Found in Sample: [S608] F608: Sample, alpha, CCAB-8	Found in Sample: [S609] F609: Sample, precursor, CCAB-8	Found in Sample: [S610] F610: Sample, beta, CCAB-8	Found in Sample: [S623] F623: Sample, alpha, CCAB-11	Found in Sample: [S624] F624: Sample, alpha, CCAB-11	Found in Sample: [S625] F625: Sample, precursor, CCAB-11	Found in Sample: [S626] F626: Sample, precursor, CCAB-11	Found in Sample: [S627] F627: Sample, beta, CCAB-11	Found in Sample: [S628] F628: Sample, beta, CCAB-11	Found in Sample: [S629] F629: Sample, alpha, wild-type b	Found in Sample: [S630] F630: Sample, alpha, wild-type b	Found in Sample: [S631] F631: Sample, precursor, wild-type b	Found in Sample: [S632] F632: Sample, precursor, wild-type b	Found in Sample: [S633] F633: Sample, beta, wild-type b	Found in Sample: [S634] F634: Sample, beta, wild-type b	Found in Sample: [S635] F635: Sample, alpha, wild-type a	Found in Sample: [S636] F636: Sample, precursor, wild-type a	Found in Sample: [S637] F637: Sample, beta, wild-type a	Found in Sample: [S643] F643: Sample, alpha, CCAB-6	Found in Sample: [S644] F644: Sample, alpha, CCAB-6
2744	1	1	1	1	[Master Protein] ACRE_091300	Not Found	Not Found	Not Found	Not Found	Not Found	Not Found	Not Found	Not Found	Not Found	Not Found	Not Found	Not Found	Not Found	Not Found	Not Found	Not Found	Not Found	Not Found	Not Found	Not Found	Not Found	Not Found	Not Found	Not Found	Not Found	Not Found	High	Not Found	Not Found	Not Found	Not Found	Not Found	Not Found	Not Found	Not Found	Not Found	Not Found	Not Found
Checked	Confidence	Identifying Node	PSM Ambiguity	Annotated Sequence	Modifications	# Proteins	Master Protein Accessions	Protein Accessions	# Missed Cleavages	Charge	DeltaScore	DeltaCn	Rank	Search Engine Rank	m/z [Da]	MH+ [Da]	Theo. MH+ [Da]	DeltaM [ppm]	Deltam/z [Da]	Activation Type	MS Order	Isolation Interference [%]	Ion Inject Time [ms]	RT [min]	First Scan	Spectrum File	File ID	XCorr	# Protein Groups
FALSE	High	Sequest HT (A2)	Unambiguous	ACNTKSAFSAFAAQATHK		1	ACRE_091300	ACRE_091300	1	2	0.2918	0	1	1	927.445	1853.88	1853.9	-6.94	-0.00643	CID (Collision Induced Dissociation)	MS2	50.3417	22.976	45.4973	15077	CCAB-11b2.raw	F628	2.33	1
ACRE_091290	ACRE_091290	13	1	1	1	83	9.3	8.37	2.21	1	Not Found	Not Found	Not Found	Not Found	High	Not Found	Not Found	Not Found	Not Found	Not Found	Not Found	Not Found	Not Found	Not Found	Not Found	Not Found	Not Found	Not Found	Not Found	Not Found	Not Found	Not Found	Not Found	Not Found	Not Found	Not Found	Not Found	Not Found	Not Found	Not Found	Not Found	Not Found	Not Found	Not Found	Not Found	Not Found	Not Found	Not Found	1
Protein Group ID	# Proteins	# Unique Peptides	# Peptides	# PSMs	Group Description	Found in Sample: [S578] F578: Sample, alpha, CCAB-1	Found in Sample: [S579] F579: Sample, precursor, CCAB-1	Found in Sample: [S580] F580: Sample, beta, CCAB-1	Found in Sample: [S587] F587: Sample, alpha, CCAB-2	Found in Sample: [S588] F588: Sample, beta, CCAB-2	Found in Sample: [S589] F589: Sample, beta, CCAB-2	Found in Sample: [S590] F590: Sample, alpha, CCAB-3	Found in Sample: [S591] F591: Sample, alpha, CCAB-3	Found in Sample: [S592] F592: Sample, alpha, CCAB-3	Found in Sample: [S593] F593: Sample, alpha, CCAB-3	Found in Sample: [S594] F594: Sample, alpha, CCAB-3	Found in Sample: [S595] F595: Sample, alpha, CCAB-3	Found in Sample: [S596] F596: Sample, alpha, CCAB-4	Found in Sample: [S597] F597: Sample, alpha, CCAB-4	Found in Sample: [S598] F598: Sample, alpha, CCAB-4	Found in Sample: [S599] F599: Sample, alpha, CCAB-4	Found in Sample: [S600] F600: Sample, alpha, CCAB-4	Found in Sample: [S601] F601: Sample, alpha, CCAB-4	Found in Sample: [S608] F608: Sample, alpha, CCAB-8	Found in Sample: [S609] F609: Sample, precursor, CCAB-8	Found in Sample: [S610] F610: Sample, beta, CCAB-8	Found in Sample: [S623] F623: Sample, alpha, CCAB-11	Found in Sample: [S624] F624: Sample, alpha, CCAB-11	Found in Sample: [S625] F625: Sample, precursor, CCAB-11	Found in Sample: [S626] F626: Sample, precursor, CCAB-11	Found in Sample: [S627] F627: Sample, beta, CCAB-11	Found in Sample: [S628] F628: Sample, beta, CCAB-11	Found in Sample: [S629] F629: Sample, alpha, wild-type b	Found in Sample: [S630] F630: Sample, alpha, wild-type b	Found in Sample: [S631] F631: Sample, precursor, wild-type b	Found in Sample: [S632] F632: Sample, precursor, wild-type b	Found in Sample: [S633] F633: Sample, beta, wild-type b	Found in Sample: [S634] F634: Sample, beta, wild-type b	Found in Sample: [S635] F635: Sample, alpha, wild-type a	Found in Sample: [S636] F636: Sample, precursor, wild-type a	Found in Sample: [S637] F637: Sample, beta, wild-type a	Found in Sample: [S643] F643: Sample, alpha, CCAB-6	Found in Sample: [S644] F644: Sample, alpha, CCAB-6
762	1	1	1	1	[Master Protein] ACRE_091290	Not Found	Not Found	Not Found	Not Found	High	Not Found	Not Found	Not Found	Not Found	Not Found	Not Found	Not Found	Not Found	Not Found	Not Found	Not Found	Not Found	Not Found	Not Found	Not Found	Not Found	Not Found	Not Found	Not Found	Not Found	Not Found	Not Found	Not Found	Not Found	Not Found	Not Found	Not Found	Not Found	Not Found	Not Found	Not Found	Not Found	Not Found
Checked	Confidence	Identifying Node	PSM Ambiguity	Annotated Sequence	Modifications	# Proteins	Master Protein Accessions	Protein Accessions	# Missed Cleavages	Charge	DeltaScore	DeltaCn	Rank	Search Engine Rank	m/z [Da]	MH+ [Da]	Theo. MH+ [Da]	DeltaM [ppm]	Deltam/z [Da]	Activation Type	MS Order	Isolation Interference [%]	Ion Inject Time [ms]	RT [min]	First Scan	Spectrum File	File ID	XCorr	# Protein Groups
FALSE	High	Sequest HT (A2)	Unambiguous	LLTDAEFNAAK		1	ACRE_091290	ACRE_091290	0	2	0.4389	0	1	1	596.814	1192.62	1192.62	-0.24	-0.00015	CID (Collision Induced Dissociation)	MS2	59.743	62.765	36.5447	6680	CCAB-2b.raw	F588	2.21	1
ACRE_091270	ACRE_091270	1	1	1	1	1166	125.6	7.64	2.57	1	Not Found	Not Found	Not Found	Not Found	Not Found	Not Found	Not Found	Not Found	Not Found	Not Found	Not Found	Not Found	Not Found	Not Found	Not Found	Not Found	Not Found	Not Found	Not Found	Not Found	Not Found	Not Found	Not Found	Not Found	Not Found	Not Found	Not Found	Not Found	Not Found	Not Found	Not Found	Not Found	High	Not Found	Not Found	Not Found	Not Found	Not Found	1
Protein Group ID	# Proteins	# Unique Peptides	# Peptides	# PSMs	Group Description	Found in Sample: [S578] F578: Sample, alpha, CCAB-1	Found in Sample: [S579] F579: Sample, precursor, CCAB-1	Found in Sample: [S580] F580: Sample, beta, CCAB-1	Found in Sample: [S587] F587: Sample, alpha, CCAB-2	Found in Sample: [S588] F588: Sample, beta, CCAB-2	Found in Sample: [S589] F589: Sample, beta, CCAB-2	Found in Sample: [S590] F590: Sample, alpha, CCAB-3	Found in Sample: [S591] F591: Sample, alpha, CCAB-3	Found in Sample: [S592] F592: Sample, alpha, CCAB-3	Found in Sample: [S593] F593: Sample, alpha, CCAB-3	Found in Sample: [S594] F594: Sample, alpha, CCAB-3	Found in Sample: [S595] F595: Sample, alpha, CCAB-3	Found in Sample: [S596] F596: Sample, alpha, CCAB-4	Found in Sample: [S597] F597: Sample, alpha, CCAB-4	Found in Sample: [S598] F598: Sample, alpha, CCAB-4	Found in Sample: [S599] F599: Sample, alpha, CCAB-4	Found in Sample: [S600] F600: Sample, alpha, CCAB-4	Found in Sample: [S601] F601: Sample, alpha, CCAB-4	Found in Sample: [S608] F608: Sample, alpha, CCAB-8	Found in Sample: [S609] F609: Sample, precursor, CCAB-8	Found in Sample: [S610] F610: Sample, beta, CCAB-8	Found in Sample: [S623] F623: Sample, alpha, CCAB-11	Found in Sample: [S624] F624: Sample, alpha, CCAB-11	Found in Sample: [S625] F625: Sample, precursor, CCAB-11	Found in Sample: [S626] F626: Sample, precursor, CCAB-11	Found in Sample: [S627] F627: Sample, beta, CCAB-11	Found in Sample: [S628] F628: Sample, beta, CCAB-11	Found in Sample: [S629] F629: Sample, alpha, wild-type b	Found in Sample: [S630] F630: Sample, alpha, wild-type b	Found in Sample: [S631] F631: Sample, precursor, wild-type b	Found in Sample: [S632] F632: Sample, precursor, wild-type b	Found in Sample: [S633] F633: Sample, beta, wild-type b	Found in Sample: [S634] F634: Sample, beta, wild-type b	Found in Sample: [S635] F635: Sample, alpha, wild-type a	Found in Sample: [S636] F636: Sample, precursor, wild-type a	Found in Sample: [S637] F637: Sample, beta, wild-type a	Found in Sample: [S643] F643: Sample, alpha, CCAB-6	Found in Sample: [S644] F644: Sample, alpha, CCAB-6
3266	1	1	1	1	[Master Protein] ACRE_091270	Not Found	Not Found	Not Found	Not Found	Not Found	Not Found	Not Found	Not Found	Not Found	Not Found	Not Found	Not Found	Not Found	Not Found	Not Found	Not Found	Not Found	Not Found	Not Found	Not Found	Not Found	Not Found	Not Found	Not Found	Not Found	Not Found	Not Found	Not Found	Not Found	Not Found	Not Found	Not Found	High	Not Found	Not Found	Not Found	Not Found	Not Found
Checked	Confidence	Identifying Node	PSM Ambiguity	Annotated Sequence	Modifications	# Proteins	Master Protein Accessions	Protein Accessions	# Missed Cleavages	Charge	DeltaScore	DeltaCn	Rank	Search Engine Rank	m/z [Da]	MH+ [Da]	Theo. MH+ [Da]	DeltaM [ppm]	Deltam/z [Da]	Activation Type	MS Order	Isolation Interference [%]	Ion Inject Time [ms]	RT [min]	First Scan	Spectrum File	File ID	XCorr	# Protein Groups
FALSE	High	Sequest HT (A2)	Unambiguous	NLLGGKTK		1	ACRE_091270	ACRE_091270	1	2	0.3619	0	1	1	415.76	830.514	830.509	5.14	0.00214	CID (Collision Induced Dissociation)	MS2	60.3066	7.144	34.7965	9806	WT-2b2.raw	F634	2.57	1
ACRE_091170	ACRE_091170	7	2	4	2	513	54.9	10.17	14.59	2	Not Found	Not Found	Not Found	Not Found	Not Found	Not Found	Not Found	Not Found	Not Found	Not Found	Not Found	Not Found	Not Found	Not Found	High	High	Not Found	Not Found	Not Found	Not Found	Not Found	Not Found	Not Found	Not Found	Not Found	Not Found	Not Found	Not Found	Not Found	Not Found	Not Found	Not Found	Not Found	Not Found	Not Found	Not Found	Not Found	Not Found	1
Protein Group ID	# Proteins	# Unique Peptides	# Peptides	# PSMs	Group Description	Found in Sample: [S578] F578: Sample, alpha, CCAB-1	Found in Sample: [S579] F579: Sample, precursor, CCAB-1	Found in Sample: [S580] F580: Sample, beta, CCAB-1	Found in Sample: [S587] F587: Sample, alpha, CCAB-2	Found in Sample: [S588] F588: Sample, beta, CCAB-2	Found in Sample: [S589] F589: Sample, beta, CCAB-2	Found in Sample: [S590] F590: Sample, alpha, CCAB-3	Found in Sample: [S591] F591: Sample, alpha, CCAB-3	Found in Sample: [S592] F592: Sample, alpha, CCAB-3	Found in Sample: [S593] F593: Sample, alpha, CCAB-3	Found in Sample: [S594] F594: Sample, alpha, CCAB-3	Found in Sample: [S595] F595: Sample, alpha, CCAB-3	Found in Sample: [S596] F596: Sample, alpha, CCAB-4	Found in Sample: [S597] F597: Sample, alpha, CCAB-4	Found in Sample: [S598] F598: Sample, alpha, CCAB-4	Found in Sample: [S599] F599: Sample, alpha, CCAB-4	Found in Sample: [S600] F600: Sample, alpha, CCAB-4	Found in Sample: [S601] F601: Sample, alpha, CCAB-4	Found in Sample: [S608] F608: Sample, alpha, CCAB-8	Found in Sample: [S609] F609: Sample, precursor, CCAB-8	Found in Sample: [S610] F610: Sample, beta, CCAB-8	Found in Sample: [S623] F623: Sample, alpha, CCAB-11	Found in Sample: [S624] F624: Sample, alpha, CCAB-11	Found in Sample: [S625] F625: Sample, precursor, CCAB-11	Found in Sample: [S626] F626: Sample, precursor, CCAB-11	Found in Sample: [S627] F627: Sample, beta, CCAB-11	Found in Sample: [S628] F628: Sample, beta, CCAB-11	Found in Sample: [S629] F629: Sample, alpha, wild-type b	Found in Sample: [S630] F630: Sample, alpha, wild-type b	Found in Sample: [S631] F631: Sample, precursor, wild-type b	Found in Sample: [S632] F632: Sample, precursor, wild-type b	Found in Sample: [S633] F633: Sample, beta, wild-type b	Found in Sample: [S634] F634: Sample, beta, wild-type b	Found in Sample: [S635] F635: Sample, alpha, wild-type a	Found in Sample: [S636] F636: Sample, precursor, wild-type a	Found in Sample: [S637] F637: Sample, beta, wild-type a	Found in Sample: [S643] F643: Sample, alpha, CCAB-6	Found in Sample: [S644] F644: Sample, alpha, CCAB-6
840	1	2	2	4	[Master Protein] ACRE_091170	Not Found	Not Found	Not Found	Not Found	Not Found	Not Found	Not Found	Not Found	Not Found	Not Found	Not Found	Not Found	Not Found	Not Found	High	High	Not Found	Not Found	Not Found	Not Found	Not Found	Not Found	Not Found	Not Found	Not Found	Not Found	Not Found	Not Found	Not Found	Not Found	Not Found	Not Found	Not Found	Not Found	Not Found	Not Found	Not Found	Not Found
Checked	Confidence	Identifying Node	PSM Ambiguity	Annotated Sequence	Modifications	# Proteins	Master Protein Accessions	Protein Accessions	# Missed Cleavages	Charge	DeltaScore	DeltaCn	Rank	Search Engine Rank	m/z [Da]	MH+ [Da]	Theo. MH+ [Da]	DeltaM [ppm]	Deltam/z [Da]	Activation Type	MS Order	Isolation Interference [%]	Ion Inject Time [ms]	RT [min]	First Scan	Spectrum File	File ID	XCorr	# Protein Groups
FALSE	High	Sequest HT (A2)	Unambiguous	AMAIVENEKTPTQPQSETALNETGAR		1	ACRE_091170	ACRE_091170	1	3	0.6718	0	1	1	929.458	2786.36	2786.36	-1.56	-0.00145	CID (Collision Induced Dissociation)	MS2	32.2982	150	36.0362	5487	CCAB-4a2.raw	F598	4.51	1
FALSE	High	Sequest HT (A2)	Unambiguous	AmAIVENEKTPTQPQSETALNETGAR	M2(Oxidation)	1	ACRE_091170	ACRE_091170	1	3	0.6459	0	1	1	934.79	2802.35	2802.36	-1.04	-0.00097	CID (Collision Induced Dissociation)	MS2	19.4048	150	33.608	4793	CCAB-4a2.raw	F598	4.18	1
FALSE	High	Sequest HT (A2)	Unambiguous	AmAIVENEKTPTQPQSETALNETGAR	M2(Oxidation)	1	ACRE_091170	ACRE_091170	1	3	0.5707	0	1	1	934.79	2802.35	2802.36	-1.19	-0.00111	CID (Collision Induced Dissociation)	MS2	0	66.224	33.2067	5763	CCAB-4a2-2.raw	F599	3.75	1
FALSE	High	Sequest HT (A2)	Unambiguous	FLSGETLAR		1	ACRE_091170	ACRE_091170	0	2	0.3302	0	1	1	497.272	993.536	993.536	-0.34	-0.00017	CID (Collision Induced Dissociation)	MS2	61.7963	114.842	35.2025	5247	CCAB-4a2.raw	F598	2.15	1
ACRE_091110	ACRE_091110	11	3	3	3	518	57.5	7.44	10.48	3	Not Found	Not Found	Not Found	Not Found	High	High	Not Found	Not Found	Not Found	Not Found	Not Found	Not Found	Not Found	Not Found	Not Found	Not Found	Not Found	Not Found	Not Found	Not Found	Not Found	Not Found	Not Found	Not Found	Not Found	Not Found	Not Found	Not Found	Not Found	Not Found	Not Found	Not Found	High	Not Found	Not Found	Not Found	Not Found	Not Found	1
Protein Group ID	# Proteins	# Unique Peptides	# Peptides	# PSMs	Group Description	Found in Sample: [S578] F578: Sample, alpha, CCAB-1	Found in Sample: [S579] F579: Sample, precursor, CCAB-1	Found in Sample: [S580] F580: Sample, beta, CCAB-1	Found in Sample: [S587] F587: Sample, alpha, CCAB-2	Found in Sample: [S588] F588: Sample, beta, CCAB-2	Found in Sample: [S589] F589: Sample, beta, CCAB-2	Found in Sample: [S590] F590: Sample, alpha, CCAB-3	Found in Sample: [S591] F591: Sample, alpha, CCAB-3	Found in Sample: [S592] F592: Sample, alpha, CCAB-3	Found in Sample: [S593] F593: Sample, alpha, CCAB-3	Found in Sample: [S594] F594: Sample, alpha, CCAB-3	Found in Sample: [S595] F595: Sample, alpha, CCAB-3	Found in Sample: [S596] F596: Sample, alpha, CCAB-4	Found in Sample: [S597] F597: Sample, alpha, CCAB-4	Found in Sample: [S598] F598: Sample, alpha, CCAB-4	Found in Sample: [S599] F599: Sample, alpha, CCAB-4	Found in Sample: [S600] F600: Sample, alpha, CCAB-4	Found in Sample: [S601] F601: Sample, alpha, CCAB-4	Found in Sample: [S608] F608: Sample, alpha, CCAB-8	Found in Sample: [S609] F609: Sample, precursor, CCAB-8	Found in Sample: [S610] F610: Sample, beta, CCAB-8	Found in Sample: [S623] F623: Sample, alpha, CCAB-11	Found in Sample: [S624] F624: Sample, alpha, CCAB-11	Found in Sample: [S625] F625: Sample, precursor, CCAB-11	Found in Sample: [S626] F626: Sample, precursor, CCAB-11	Found in Sample: [S627] F627: Sample, beta, CCAB-11	Found in Sample: [S628] F628: Sample, beta, CCAB-11	Found in Sample: [S629] F629: Sample, alpha, wild-type b	Found in Sample: [S630] F630: Sample, alpha, wild-type b	Found in Sample: [S631] F631: Sample, precursor, wild-type b	Found in Sample: [S632] F632: Sample, precursor, wild-type b	Found in Sample: [S633] F633: Sample, beta, wild-type b	Found in Sample: [S634] F634: Sample, beta, wild-type b	Found in Sample: [S635] F635: Sample, alpha, wild-type a	Found in Sample: [S636] F636: Sample, precursor, wild-type a	Found in Sample: [S637] F637: Sample, beta, wild-type a	Found in Sample: [S643] F643: Sample, alpha, CCAB-6	Found in Sample: [S644] F644: Sample, alpha, CCAB-6
636	1	3	3	3	[Master Protein] ACRE_091110	Not Found	Not Found	Not Found	Not Found	High	High	Not Found	Not Found	Not Found	Not Found	Not Found	Not Found	Not Found	Not Found	Not Found	Not Found	Not Found	Not Found	Not Found	Not Found	Not Found	Not Found	Not Found	Not Found	Not Found	Not Found	Not Found	Not Found	Not Found	Not Found	Not Found	Not Found	High	Not Found	Not Found	Not Found	Not Found	Not Found
Checked	Confidence	Identifying Node	PSM Ambiguity	Annotated Sequence	Modifications	# Proteins	Master Protein Accessions	Protein Accessions	# Missed Cleavages	Charge	DeltaScore	DeltaCn	Rank	Search Engine Rank	m/z [Da]	MH+ [Da]	Theo. MH+ [Da]	DeltaM [ppm]	Deltam/z [Da]	Activation Type	MS Order	Isolation Interference [%]	Ion Inject Time [ms]	RT [min]	First Scan	Spectrum File	File ID	XCorr	# Protein Groups
FALSE	High	Sequest HT (A2)	Unambiguous	LVAENYLTEDEAEPFTNQTTGLIR		1	ACRE_091110	ACRE_091110	0	3	0.6025	0	1	1	908.782	2724.33	2724.34	-2.13	-0.00194	CID (Collision Induced Dissociation)	MS2	18.5205	15.368	47.5777	12469	CCAB-2b-2.raw	F589	4.78	1
FALSE	High	Sequest HT (A2)	Unambiguous	RQPLVANGSSSTSSSSSSAR		1	ACRE_091110	ACRE_091110	1	3	0.6771	0	1	1	655.991	1965.96	1965.96	-0.35	-0.00023	CID (Collision Induced Dissociation)	MS2	36.6527	150	21.8753	3847	WT-2b2.raw	F634	3.5	1
FALSE	High	Sequest HT (A2)	Unambiguous	DKIDAVDASIR		1	ACRE_091110	ACRE_091110	1	2	0.2455	0	1	1	601.822	1202.64	1202.64	-0.03	-2e-05	CID (Collision Induced Dissociation)	MS2	73.877	60.882	31.9754	4855	CCAB-2b.raw	F588	2.2	1
ACRE_091090	ACRE_091090	53	9	827	9	123	14.1	9.41	2683.35	9	High	Not Found	Not Found	High	High	High	High	High	High	High	High	High	High	High	High	High	High	High	Not Found	Not Found	Not Found	Not Found	Not Found	Not Found	Not Found	Not Found	Not Found	Not Found	Not Found	Not Found	Not Found	Not Found	Not Found	High	Not Found	Not Found	Not Found	Not Found	1
Protein Group ID	# Proteins	# Unique Peptides	# Peptides	# PSMs	Group Description	Found in Sample: [S578] F578: Sample, alpha, CCAB-1	Found in Sample: [S579] F579: Sample, precursor, CCAB-1	Found in Sample: [S580] F580: Sample, beta, CCAB-1	Found in Sample: [S587] F587: Sample, alpha, CCAB-2	Found in Sample: [S588] F588: Sample, beta, CCAB-2	Found in Sample: [S589] F589: Sample, beta, CCAB-2	Found in Sample: [S590] F590: Sample, alpha, CCAB-3	Found in Sample: [S591] F591: Sample, alpha, CCAB-3	Found in Sample: [S592] F592: Sample, alpha, CCAB-3	Found in Sample: [S593] F593: Sample, alpha, CCAB-3	Found in Sample: [S594] F594: Sample, alpha, CCAB-3	Found in Sample: [S595] F595: Sample, alpha, CCAB-3	Found in Sample: [S596] F596: Sample, alpha, CCAB-4	Found in Sample: [S597] F597: Sample, alpha, CCAB-4	Found in Sample: [S598] F598: Sample, alpha, CCAB-4	Found in Sample: [S599] F599: Sample, alpha, CCAB-4	Found in Sample: [S600] F600: Sample, alpha, CCAB-4	Found in Sample: [S601] F601: Sample, alpha, CCAB-4	Found in Sample: [S608] F608: Sample, alpha, CCAB-8	Found in Sample: [S609] F609: Sample, precursor, CCAB-8	Found in Sample: [S610] F610: Sample, beta, CCAB-8	Found in Sample: [S623] F623: Sample, alpha, CCAB-11	Found in Sample: [S624] F624: Sample, alpha, CCAB-11	Found in Sample: [S625] F625: Sample, precursor, CCAB-11	Found in Sample: [S626] F626: Sample, precursor, CCAB-11	Found in Sample: [S627] F627: Sample, beta, CCAB-11	Found in Sample: [S628] F628: Sample, beta, CCAB-11	Found in Sample: [S629] F629: Sample, alpha, wild-type b	Found in Sample: [S630] F630: Sample, alpha, wild-type b	Found in Sample: [S631] F631: Sample, precursor, wild-type b	Found in Sample: [S632] F632: Sample, precursor, wild-type b	Found in Sample: [S633] F633: Sample, beta, wild-type b	Found in Sample: [S634] F634: Sample, beta, wild-type b	Found in Sample: [S635] F635: Sample, alpha, wild-type a	Found in Sample: [S636] F636: Sample, precursor, wild-type a	Found in Sample: [S637] F637: Sample, beta, wild-type a	Found in Sample: [S643] F643: Sample, alpha, CCAB-6	Found in Sample: [S644] F644: Sample, alpha, CCAB-6
761	1	9	9	827	[Master Protein] ACRE_091090	High	Not Found	Not Found	High	High	High	High	High	High	High	High	High	High	High	High	High	High	High	Not Found	Not Found	Not Found	Not Found	Not Found	Not Found	Not Found	Not Found	Not Found	Not Found	Not Found	Not Found	Not Found	Not Found	Not Found	High	Not Found	Not Found	Not Found	Not Found
Checked	Confidence	Identifying Node	PSM Ambiguity	Annotated Sequence	Modifications	# Proteins	Master Protein Accessions	Protein Accessions	# Missed Cleavages	Charge	DeltaScore	DeltaCn	Rank	Search Engine Rank	m/z [Da]	MH+ [Da]	Theo. MH+ [Da]	DeltaM [ppm]	Deltam/z [Da]	Activation Type	MS Order	Isolation Interference [%]	Ion Inject Time [ms]	RT [min]	First Scan	Spectrum File	File ID	XCorr	# Protein Groups
FALSE	High	Sequest HT (A2)	Unambiguous	KFIINASQPANDKIFDVSAFEK		1	ACRE_091090	ACRE_091090	2	3	0.6995	0	1	1	828.106	2482.3	2482.3	2.85	0.00236	CID (Collision Induced Dissociation)	MS2	18.4568	80.726	45.4261	9118	WT-a.raw	F635	5.69	1
FALSE	High	Sequest HT (A2)	Unambiguous	KFIINASQPANDKIFDVSAFEK		1	ACRE_091090	ACRE_091090	2	3	0.7291	0	1	1	828.105	2482.3	2482.3	1.22	0.00101	CID (Collision Induced Dissociation)	MS2	28.7482	140.997	50.5199	11382	CCAB-2a3-2.raw	F587	5.5	1
FALSE	High	Sequest HT (A2)	Unambiguous	KFIINASQPANDKIFDVSAFEK		1	ACRE_091090	ACRE_091090	2	3	0.6939	0	1	1	828.104	2482.3	2482.3	-0.18	-0.00015	CID (Collision Induced Dissociation)	MS2	28.9844	98.792	49.7269	9052	CCAB-4a2.raw	F598	5.39	1
FALSE	High	Sequest HT (A2)	Unambiguous	KFIINASQPANDKIFDVSAFEK		1	ACRE_091090	ACRE_091090	2	3	0.7543	0	1	1	828.103	2482.3	2482.3	-0.83	-0.00069	CID (Collision Induced Dissociation)	MS2	56.1179	145.294	51.0253	12109	CCAB-4a2-2.raw	F599	5.29	1
FALSE	High	Sequest HT (A2)	Unambiguous	KFIINASQPANDKIFDVSAFEK		1	ACRE_091090	ACRE_091090	2	3	0.7519	0	1	1	828.103	2482.29	2482.3	-1.15	-0.00096	CID (Collision Induced Dissociation)	MS2	30.2349	150	50.5298	9278	CCAB-4a2.raw	F598	5.2	1
FALSE	High	Sequest HT (A2)	Unambiguous	KFIINASQPANDKIFDVSAFEK		1	ACRE_091090	ACRE_091090	2	3	0.6901	0	1	1	828.103	2482.29	2482.3	-1.21	-0.001	CID (Collision Induced Dissociation)	MS2	39.0097	150	48.9473	8841	CCAB-4a2.raw	F598	5.13	1
FALSE	High	Sequest HT (A2)	Unambiguous	KFIINASQPANDKIFDVSAFEK		1	ACRE_091090	ACRE_091090	2	3	0.6902	0	1	1	828.105	2482.3	2482.3	0.68	0.00057	CID (Collision Induced Dissociation)	MS2	49.7118	150	54.8491	12941	CCAB-4a2-2.raw	F599	5.1	1
FALSE	High	Sequest HT (A2)	Unambiguous	KFIINASQPANDKIFDVSAFEK		1	ACRE_091090	ACRE_091090	2	3	0.6694	0	1	1	828.104	2482.3	2482.3	-0.41	-0.00034	CID (Collision Induced Dissociation)	MS2	33.1888	150	54.6826	12903	CCAB-4a2-2.raw	F599	4.87	1
FALSE	High	Sequest HT (A2)	Unambiguous	KFIINASQPANDKIFDVSAFEK		1	ACRE_091090	ACRE_091090	2	3	0.5918	0	1	1	828.102	2482.29	2482.3	-2.59	-0.00214	CID (Collision Induced Dissociation)	MS2	47.7889	150	51.1016	12127	CCAB-4a2-2.raw	F599	4.85	1
FALSE	High	Sequest HT (A2)	Unambiguous	SGGKIEVIAHNELSGR		1	ACRE_091090	ACRE_091090	1	3	0.6464	0	1	1	556.301	1666.89	1666.89	0.14	8e-05	CID (Collision Induced Dissociation)	MS2	20.1611	14.392	47.2294	10378	CCAB-2a3-2.raw	F587	4.78	1
FALSE	High	Sequest HT (A2)	Unambiguous	KFIINASQPANDKIFDVSAFEK		1	ACRE_091090	ACRE_091090	2	3	0.6751	0	1	1	828.108	2482.31	2482.3	5.19	0.0043	CID (Collision Induced Dissociation)	MS2	70.2871	150	55.8182	13162	CCAB-4a2-2.raw	F599	4.77	1
FALSE	High	Sequest HT (A2)	Unambiguous	KFIINASQPANDKIFDVSAFEK		1	ACRE_091090	ACRE_091090	2	3	0.708	0	1	1	828.105	2482.3	2482.3	0.63	0.00052	CID (Collision Induced Dissociation)	MS2	82.8966	150	54.6075	12886	CCAB-4a2-2.raw	F599	4.76	1
FALSE	High	Sequest HT (A2)	Unambiguous	KFIINASQPANDKIFDVSAFEK		1	ACRE_091090	ACRE_091090	2	3	0.7137	0	1	1	828.104	2482.3	2482.3	-0.25	-0.0002	CID (Collision Induced Dissociation)	MS2	52.133	150	55.5022	13090	CCAB-4a2-2.raw	F599	4.75	1
FALSE	High	Sequest HT (A2)	Unambiguous	KFIINASQPANDKIFDVSAFEK		1	ACRE_091090	ACRE_091090	2	3	0.4989	0	1	1	828.103	2482.29	2482.3	-1.83	-0.00152	CID (Collision Induced Dissociation)	MS2	81.893	150	56.4151	13300	CCAB-4a2-2.raw	F599	4.71	1
FALSE	High	Sequest HT (A2)	Unambiguous	KFIINASQPANDK		1	ACRE_091090	ACRE_091090	1	2	0.5404	0	1	1	723.39	1445.77	1445.77	-0.76	-0.00055	CID (Collision Induced Dissociation)	MS2	9.47991	8.117	34.0768	5742	CCAB-3a3-2.raw	F595	4.7	1
FALSE	High	Sequest HT (A2)	Unambiguous	SGGKIEVIAHNELSGR		1	ACRE_091090	ACRE_091090	1	3	0.6723	0	1	1	556.3	1666.89	1666.89	-0.47	-0.00026	CID (Collision Induced Dissociation)	MS2	42.1001	14.804	44.0722	9437	CCAB-2a3-2.raw	F587	4.7	1
FALSE	High	Sequest HT (A2)	Unambiguous	SGGKIEVIAHNELSGR		1	ACRE_091090	ACRE_091090	1	3	0.7228	0	1	1	556.301	1666.89	1666.89	0.78	0.00043	CID (Collision Induced Dissociation)	MS2	9.82292	32.976	56.8855	12515	CCAB-3a3-2.raw	F595	4.69	1
FALSE	High	Sequest HT (A2)	Unambiguous	SGGKIEVIAHNELSGR		1	ACRE_091090	ACRE_091090	1	3	0.7122	0	1	1	556.3	1666.89	1666.89	-0.49	-0.00027	CID (Collision Induced Dissociation)	MS2	18.1163	91.37	59.2298	13038	CCAB-3a3-2.raw	F595	4.69	1
FALSE	High	Sequest HT (A2)	Unambiguous	SGGKIEVIAHNELSGR		1	ACRE_091090	ACRE_091090	1	3	0.6717	0	1	1	556.301	1666.89	1666.89	0.1	6e-05	CID (Collision Induced Dissociation)	MS2	35.6964	150	48.7562	8795	CCAB-4a2.raw	F598	4.66	1
FALSE	High	Sequest HT (A2)	Unambiguous	FIINASQPANDKIFDVSAFEK		1	ACRE_091090	ACRE_091090	1	2	0.6853	0	1	1	1177.6	2354.2	2354.2	-0.7	-0.00082	CID (Collision Induced Dissociation)	MS2	0	150	48.2471	8675	CCAB-4a2.raw	F598	4.64	1
FALSE	High	Sequest HT (A2)	Unambiguous	KFIINASQPANDKIFDVSAFEK		1	ACRE_091090	ACRE_091090	2	3	0.597	0	1	1	828.103	2482.29	2482.3	-1.69	-0.0014	CID (Collision Induced Dissociation)	MS2	38.6725	100.932	49.9663	9124	CCAB-4a2.raw	F598	4.64	1
FALSE	High	Sequest HT (A2)	Unambiguous	SGGKIEVIAHNELSGR		1	ACRE_091090	ACRE_091090	1	3	0.6803	0	1	1	556.301	1666.89	1666.89	1.46	0.00081	CID (Collision Induced Dissociation)	MS2	11.7413	17.517	48.8745	10631	CCAB-3a3-2.raw	F595	4.63	1
FALSE	High	Sequest HT (A2)	Unambiguous	TNNLGDAVVIQQK		1	ACRE_091090	ACRE_091090	0	2	0.5097	0	1	1	700.382	1399.76	1399.75	2.6	0.00182	CID (Collision Induced Dissociation)	MS2	0.359212	3.619	34.9822	4112	CCAB-4a3.raw	F600	4.63	1
FALSE	High	Sequest HT (A2)	Unambiguous	SGGKIEVIAHNELSGR		1	ACRE_091090	ACRE_091090	1	2	0.7403	0	1	1	833.947	1666.89	1666.89	0.13	0.0001	CID (Collision Induced Dissociation)	MS2	55.4459	150	56.1279	12344	CCAB-3a3-2.raw	F595	4.62	1
FALSE	High	Sequest HT (A2)	Unambiguous	KFIINASQPANDKIFDVSAFEK		1	ACRE_091090	ACRE_091090	2	3	0.7554	0	1	1	828.104	2482.3	2482.3	-0.67	-0.00056	CID (Collision Induced Dissociation)	MS2	79.024	150	44.917	7254	CCAB-1a.raw	F578	4.62	1
FALSE	High	Sequest HT (A2)	Unambiguous	SGGKIEVIAHNELSGR		1	ACRE_091090	ACRE_091090	1	3	0.7457	0	1	1	556.3	1666.89	1666.89	-0.99	-0.00055	CID (Collision Induced Dissociation)	MS2	56.9193	40.446	50.6084	11192	CCAB-3a3-2.raw	F595	4.6	1
FALSE	High	Sequest HT (A2)	Unambiguous	SGGKIEVIAHNELSGR		1	ACRE_091090	ACRE_091090	1	3	0.7576	0	1	1	556.301	1666.89	1666.89	0.48	0.00027	CID (Collision Induced Dissociation)	MS2	11.5804	28.736	55.2892	12154	CCAB-3a3-2.raw	F595	4.58	1
FALSE	High	Sequest HT (A2)	Unambiguous	SGGKIEVIAHNELSGR		1	ACRE_091090	ACRE_091090	1	2	0.698	0	1	1	833.947	1666.89	1666.89	0.07	6e-05	CID (Collision Induced Dissociation)	MS2	19.5352	150	55.4266	12186	CCAB-3a3-2.raw	F595	4.57	1
FALSE	High	Sequest HT (A2)	Unambiguous	KFIINASQPANDKIFDVSAFEK		1	ACRE_091090	ACRE_091090	2	3	0.657	0	1	1	828.108	2482.31	2482.3	4.36	0.00361	CID (Collision Induced Dissociation)	MS2	43.203	150	45.7523	7444	CCAB-1a.raw	F578	4.49	1
FALSE	High	Sequest HT (A2)	Unambiguous	SGGKIEVIAHNELSGR		1	ACRE_091090	ACRE_091090	1	3	0.6704	0	1	1	556.301	1666.89	1666.89	0.6	0.00033	CID (Collision Induced Dissociation)	MS2	11.4323	41.841	57.6662	12694	CCAB-3a3-2.raw	F595	4.49	1
FALSE	High	Sequest HT (A2)	Unambiguous	SGGKIEVIAHNELSGR		1	ACRE_091090	ACRE_091090	1	3	0.6102	0	1	1	556.301	1666.89	1666.89	0.45	0.00025	CID (Collision Induced Dissociation)	MS2	28.0588	14.304	46.4683	10169	CCAB-2a3-2.raw	F587	4.49	1
FALSE	High	Sequest HT (A2)	Unambiguous	TNNLGDAVVIQQK		1	ACRE_091090	ACRE_091090	0	2	0.5424	0	1	1	700.381	1399.76	1399.75	0.76	0.00053	CID (Collision Induced Dissociation)	MS2	22.4646	86.765	31.0282	3863	CCAB-1a.raw	F578	4.48	1
FALSE	High	Sequest HT (A2)	Unambiguous	KFIINASQPANDKIFDVSAFEK		1	ACRE_091090	ACRE_091090	2	3	0.6085	0	1	1	828.103	2482.29	2482.3	-1.86	-0.00154	CID (Collision Induced Dissociation)	MS2	8.97903	150	44.0238	7051	CCAB-1a.raw	F578	4.47	1
FALSE	High	Sequest HT (A2)	Unambiguous	KFIINASQPANDKIFDVSAFEK		1	ACRE_091090	ACRE_091090	2	3	0.6143	0	1	1	828.104	2482.3	2482.3	-0.45	-0.00037	CID (Collision Induced Dissociation)	MS2	35.8596	150	43.8509	8755	WT-a.raw	F635	4.46	1
FALSE	High	Sequest HT (A2)	Unambiguous	KFIINASQPANDKIFDVSAFEK		1	ACRE_091090	ACRE_091090	2	3	0.6998	0	1	1	828.104	2482.3	2482.3	0.21	0.00017	CID (Collision Induced Dissociation)	MS2	0	150	56.1051	10355	CCAB-4a2.raw	F598	4.43	1
FALSE	High	Sequest HT (A2)	Unambiguous	SGGKIEVIAHNELSGR		1	ACRE_091090	ACRE_091090	1	2	0.6259	0	1	1	833.946	1666.88	1666.89	-1.37	-0.00115	CID (Collision Induced Dissociation)	MS2	70.0691	150	56.8961	12518	CCAB-3a3-2.raw	F595	4.41	1
FALSE	High	Sequest HT (A2)	Unambiguous	SGGKIEVIAHNELSGR		1	ACRE_091090	ACRE_091090	1	3	0.6409	0	1	1	556.301	1666.89	1666.89	1.06	0.00059	CID (Collision Induced Dissociation)	MS2	17.1156	55.587	58.4379	12865	CCAB-3a3-2.raw	F595	4.4	1
FALSE	High	Sequest HT (A2)	Unambiguous	KFIINASQPANDKIFDVSAFEK		1	ACRE_091090	ACRE_091090	2	3	0.6948	0	1	1	828.105	2482.3	2482.3	0.83	0.00068	CID (Collision Induced Dissociation)	MS2	59.0761	150	54.7639	10098	CCAB-4a2.raw	F598	4.39	1
FALSE	High	Sequest HT (A2)	Unambiguous	TNNLGDAVVIQQK		1	ACRE_091090	ACRE_091090	0	2	0.5126	0	1	1	700.379	1399.75	1399.75	-2.28	-0.0016	CID (Collision Induced Dissociation)	MS2	47.375	61.568	35.9913	5390	CCAB-3a3.raw	F594	4.37	1
FALSE	High	Sequest HT (A2)	Unambiguous	KFIINASQPANDKIFDVSAFEK		1	ACRE_091090	ACRE_091090	2	3	0.5986	0	1	1	828.105	2482.3	2482.3	1.48	0.00123	CID (Collision Induced Dissociation)	MS2	9.64337	81.559	44.6092	8928	WT-a.raw	F635	4.36	1
FALSE	High	Sequest HT (A2)	Unambiguous	SGGKIEVIAHNELSGR		1	ACRE_091090	ACRE_091090	1	3	0.6345	0	1	1	556.3	1666.89	1666.89	-0.11	-6e-05	CID (Collision Induced Dissociation)	MS2	10.6804	23.76	48.1023	10427	CCAB-3a3-2.raw	F595	4.35	1
FALSE	High	Sequest HT (A2)	Unambiguous	SGGKIEVIAHNELSGR		1	ACRE_091090	ACRE_091090	1	3	0.6244	0	1	1	556.301	1666.89	1666.89	1.32	0.00073	CID (Collision Induced Dissociation)	MS2	35.1949	122.506	49.5404	8854	CCAB-3a3.raw	F594	4.34	1
FALSE	High	Sequest HT (A2)	Unambiguous	SGGKIEVIAHNELSGR		1	ACRE_091090	ACRE_091090	1	4	0.6567	0	1	1	417.478	1666.89	1666.89	1.35	0.00056	CID (Collision Induced Dissociation)	MS2	14.3093	44.578	56.1884	12358	CCAB-3a3-2.raw	F595	4.34	1
FALSE	High	Sequest HT (A2)	Unambiguous	KFIINASQPANDK		1	ACRE_091090	ACRE_091090	1	2	0.5173	0	1	1	723.389	1445.77	1445.77	-2.12	-0.00153	CID (Collision Induced Dissociation)	MS2	58.0846	95.244	33.3803	4659	CCAB-3a3.raw	F594	4.33	1
FALSE	High	Sequest HT (A2)	Unambiguous	KFIINASQPANDK		1	ACRE_091090	ACRE_091090	1	2	0.5589	0	1	1	723.392	1445.78	1445.77	1.09	0.00079	CID (Collision Induced Dissociation)	MS2	17.2896	95.965	32.6899	4530	CCAB-4a2.raw	F598	4.33	1
FALSE	High	Sequest HT (A2)	Unambiguous	SGGKIEVIAHNELSGR		1	ACRE_091090	ACRE_091090	1	3	0.5452	0	1	1	556.301	1666.89	1666.89	1.01	0.00056	CID (Collision Induced Dissociation)	MS2	35.7998	25.782	47.1563	10178	CCAB-3a3-2.raw	F595	4.31	1
FALSE	High	Sequest HT (A2)	Unambiguous	FIINASQPANDKIFDVSAFEK		1	ACRE_091090	ACRE_091090	1	3	0.5847	0	1	1	785.407	2354.21	2354.2	1.7	0.00133	CID (Collision Induced Dissociation)	MS2	3.09466	13.286	48.8321	8812	CCAB-4a2.raw	F598	4.31	1
FALSE	High	Sequest HT (A2)	Unambiguous	SGGKIEVIAHNELSGR		1	ACRE_091090	ACRE_091090	1	3	0.6845	0	1	1	556.301	1666.89	1666.89	1.11	0.00061	CID (Collision Induced Dissociation)	MS2	15.5151	150	59.4236	10884	CCAB-3a3.raw	F594	4.31	1
FALSE	High	Sequest HT (A2)	Unambiguous	SGGKIEVIAHNELSGR		1	ACRE_091090	ACRE_091090	1	3	0.7163	0	1	1	556.301	1666.89	1666.89	-0.09	-5e-05	CID (Collision Induced Dissociation)	MS2	37.2882	59.158	58.5474	13074	CCAB-2a3-2.raw	F587	4.3	1
FALSE	High	Sequest HT (A2)	Unambiguous	SGGKIEVIAHNELSGR		1	ACRE_091090	ACRE_091090	1	3	0.6512	0	1	1	556.301	1666.89	1666.89	-0.08	-5e-05	CID (Collision Induced Dissociation)	MS2	33.4011	13.584	45.7038	9938	CCAB-2a3-2.raw	F587	4.3	1
FALSE	High	Sequest HT (A2)	Unambiguous	SGGKIEVIAHNELSGR		1	ACRE_091090	ACRE_091090	1	2	0.7179	0	1	1	833.948	1666.89	1666.89	0.85	0.00071	CID (Collision Induced Dissociation)	MS2	62.1099	150	56.2201	12366	CCAB-3a3-2.raw	F595	4.29	1
FALSE	High	Sequest HT (A2)	Unambiguous	SGGKIEVIAHNELSGR		1	ACRE_091090	ACRE_091090	1	4	0.6154	0	1	1	417.478	1666.89	1666.89	1.45	0.0006	CID (Collision Induced Dissociation)	MS2	11.6372	39.506	56.1116	12521	CCAB-2a3-2.raw	F587	4.29	1
FALSE	High	Sequest HT (A2)	Unambiguous	SGGKIEVIAHNELSGR		1	ACRE_091090	ACRE_091090	1	3	0.5888	0	1	1	556.3	1666.89	1666.89	-0.23	-0.00013	CID (Collision Induced Dissociation)	MS2	20.7151	15.049	48.8176	10815	CCAB-2a3-2.raw	F587	4.28	1
FALSE	High	Sequest HT (A2)	Unambiguous	FYNVVNDEADEDED		1	ACRE_091090	ACRE_091090	0	2	0.8645	0	1	1	837.328	1673.65	1673.64	1.99	0.00167	CID (Collision Induced Dissociation)	MS2	0.223452	0.538	37.1398	6869	CCAB-3a3-2.raw	F595	4.28	1
FALSE	High	Sequest HT (A2)	Unambiguous	SGGKIEVIAHNELSGR		1	ACRE_091090	ACRE_091090	1	3	0.5818	0	1	1	556.3	1666.88	1666.89	-1.44	-0.0008	CID (Collision Induced Dissociation)	MS2	13.106	150	59.1379	10829	CCAB-3a3.raw	F594	4.28	1
FALSE	High	Sequest HT (A2)	Unambiguous	KFIINASQPANDKIFDVSAFEK		1	ACRE_091090	ACRE_091090	2	3	0.6721	0	1	1	828.103	2482.29	2482.3	-1.12	-0.00093	CID (Collision Induced Dissociation)	MS2	31.1512	150	54.3665	12832	CCAB-4a2-2.raw	F599	4.27	1
FALSE	High	Sequest HT (A2)	Unambiguous	SGGKIEVIAHNELSGR		1	ACRE_091090	ACRE_091090	1	3	0.5738	0	1	1	556.301	1666.89	1666.89	1.04	0.00058	CID (Collision Induced Dissociation)	MS2	33.181	150	47.9681	8608	CCAB-4a2.raw	F598	4.27	1
FALSE	High	Sequest HT (A2)	Unambiguous	SGGKIEVIAHNELSGR		1	ACRE_091090	ACRE_091090	1	3	0.5117	0	1	1	556.301	1666.89	1666.89	1.49	0.00083	CID (Collision Induced Dissociation)	MS2	23.6419	129.132	46.2905	8092	CCAB-3a3.raw	F594	4.26	1
FALSE	High	Sequest HT (A2)	Unambiguous	TNNLGDAVVIQQK		1	ACRE_091090	ACRE_091090	0	2	0.493	0	1	1	700.382	1399.76	1399.75	1.97	0.00138	CID (Collision Induced Dissociation)	MS2	41.3717	142.247	33.6305	4660	CCAB-3a2.raw	F592	4.26	1
FALSE	High	Sequest HT (A2)	Unambiguous	FYNVVNDEADEDED		1	ACRE_091090	ACRE_091090	0	2	0.8165	0	1	1	837.327	1673.65	1673.64	1.16	0.00097	CID (Collision Induced Dissociation)	MS2	29.2042	15.215	37.7144	7517	CCAB-4a2-2.raw	F599	4.25	1
FALSE	High	Sequest HT (A2)	Unambiguous	TNNLGDAVVIQQK		1	ACRE_091090	ACRE_091090	0	2	0.52	0	1	1	700.383	1399.76	1399.75	2.85	0.002	CID (Collision Induced Dissociation)	MS2	0.771591	0.73	34.9775	5179	CCAB-4a2.raw	F598	4.25	1
FALSE	High	Sequest HT (A2)	Unambiguous	KFIINASQPANDK		1	ACRE_091090	ACRE_091090	1	2	0.5154	0	1	1	723.39	1445.77	1445.77	-1.47	-0.00106	CID (Collision Induced Dissociation)	MS2	41.9015	17.282	32.9473	5665	CCAB-4a2-2.raw	F599	4.23	1
FALSE	High	Sequest HT (A2)	Unambiguous	SGGKIEVIAHNELSGR		1	ACRE_091090	ACRE_091090	1	3	0.6817	0	1	1	556.3	1666.89	1666.89	-0.5	-0.00028	CID (Collision Induced Dissociation)	MS2	35.4511	12.905	49.5859	11069	CCAB-2a3-2.raw	F587	4.21	1
FALSE	High	Sequest HT (A2)	Unambiguous	SGGKIEVIAHNELSGR		1	ACRE_091090	ACRE_091090	1	3	0.6214	0	1	1	556.301	1666.89	1666.89	0.4	0.00022	CID (Collision Induced Dissociation)	MS2	38.5206	13.889	44.8796	9700	CCAB-2a3-2.raw	F587	4.2	1
FALSE	High	Sequest HT (A2)	Unambiguous	SGGKIEVIAHNELSGR		1	ACRE_091090	ACRE_091090	1	4	0.6976	0	1	1	417.477	1666.89	1666.89	0.09	4e-05	CID (Collision Induced Dissociation)	MS2	31.2301	22.775	45.712	9942	CCAB-2a3-2.raw	F587	4.2	1
FALSE	High	Sequest HT (A2)	Unambiguous	SGGKIEVIAHNELSGR		1	ACRE_091090	ACRE_091090	1	2	0.5595	0	1	1	833.946	1666.89	1666.89	-1.13	-0.00094	CID (Collision Induced Dissociation)	MS2	64.5792	150	43.8	9354	CCAB-2a3-2.raw	F587	4.2	1
FALSE	High	Sequest HT (A2)	Unambiguous	TNNLGDAVVIQQK		1	ACRE_091090	ACRE_091090	0	2	0.4976	0	1	1	700.382	1399.76	1399.75	2.21	0.00155	CID (Collision Induced Dissociation)	MS2	4.52289	4.684	34.4005	5163	CCAB-4a3-2.raw	F601	4.2	1
FALSE	High	Sequest HT (A2)	Unambiguous	SGGKIEVIAHNELSGR		1	ACRE_091090	ACRE_091090	1	3	0.6683	0	1	1	556.3	1666.88	1666.89	-1.73	-0.00096	CID (Collision Induced Dissociation)	MS2	42.8274	150	57.1311	10463	CCAB-4a3-2.raw	F601	4.19	1
FALSE	High	Sequest HT (A2)	Unambiguous	TNNLGDAVVIQQK		1	ACRE_091090	ACRE_091090	0	2	0.5203	0	1	1	700.379	1399.75	1399.75	-2.7	-0.00189	CID (Collision Induced Dissociation)	MS2	70.1498	61.43	34.5613	5295	CCAB-3a1.raw	F590	4.19	1
FALSE	High	Sequest HT (A2)	Unambiguous	SGGKIEVIAHNELSGR		1	ACRE_091090	ACRE_091090	1	3	0.642	0	1	1	556.301	1666.89	1666.89	0.48	0.00027	CID (Collision Induced Dissociation)	MS2	13.9016	150	57.4266	10478	CCAB-3a3.raw	F594	4.19	1
FALSE	High	Sequest HT (A2)	Unambiguous	SGGKIEVIAHNELSGR		1	ACRE_091090	ACRE_091090	1	3	0.5837	0	1	1	556.3	1666.88	1666.89	-1.56	-0.00087	CID (Collision Induced Dissociation)	MS2	42.2292	150	59.1266	10893	CCAB-4a2.raw	F598	4.18	1
FALSE	High	Sequest HT (A2)	Unambiguous	TNNLGDAVVIQQK		1	ACRE_091090	ACRE_091090	0	2	0.4724	0	1	1	700.38	1399.75	1399.75	-1.4	-0.00098	CID (Collision Induced Dissociation)	MS2	61.6271	150	36.1467	4395	CCAB-4a3.raw	F600	4.17	1
FALSE	High	Sequest HT (A2)	Unambiguous	SGGKIEVIAHNELSGR		1	ACRE_091090	ACRE_091090	1	2	0.6538	0	1	1	833.947	1666.89	1666.89	-0.03	-2e-05	CID (Collision Induced Dissociation)	MS2	33.7095	150	57.2078	12777	CCAB-2a3-2.raw	F587	4.16	1
FALSE	High	Sequest HT (A2)	Unambiguous	TNNLGDAVVIQQK		1	ACRE_091090	ACRE_091090	0	2	0.4808	0	1	1	700.382	1399.76	1399.75	1.63	0.00114	CID (Collision Induced Dissociation)	MS2	46.9817	8.3	34.7733	4968	CCAB-3a2.raw	F592	4.16	1
FALSE	High	Sequest HT (A2)	Unambiguous	SGGKIEVIAHNELSGR		1	ACRE_091090	ACRE_091090	1	3	0.6916	0	1	1	556.3	1666.89	1666.89	-0.71	-0.00039	CID (Collision Induced Dissociation)	MS2	23.6436	150	56.3697	10306	CCAB-4a3-2.raw	F601	4.15	1
FALSE	High	Sequest HT (A2)	Unambiguous	SGGKIEVIAHNELSGR		1	ACRE_091090	ACRE_091090	1	4	0.6458	0	1	1	417.477	1666.89	1666.89	0.55	0.00023	CID (Collision Induced Dissociation)	MS2	30.3391	150	47.8945	8466	CCAB-3a3.raw	F594	4.15	1
FALSE	High	Sequest HT (A2)	Unambiguous	FIINASQPANDKIFDVSAFEK		1	ACRE_091090	ACRE_091090	1	2	0.6425	0	1	1	1177.6	2354.2	2354.2	-1.05	-0.00123	CID (Collision Induced Dissociation)	MS2	6.19383	84.162	48.8987	10842	CCAB-2a3-2.raw	F587	4.14	1
FALSE	High	Sequest HT (A2)	Unambiguous	TNNLGDAVVIQQK		1	ACRE_091090	ACRE_091090	0	2	0.5266	0	1	1	700.381	1399.75	1399.75	0.53	0.00037	CID (Collision Induced Dissociation)	MS2	40.5281	9.23	35.9513	6432	CCAB-3a3-2.raw	F595	4.14	1
FALSE	High	Sequest HT (A2)	Unambiguous	SGGKIEVIAHNELSGR		1	ACRE_091090	ACRE_091090	1	3	0.6707	0	1	1	556.301	1666.89	1666.89	1.63	0.00091	CID (Collision Induced Dissociation)	MS2	17.551	150	56.6704	10321	CCAB-3a3.raw	F594	4.13	1
FALSE	High	Sequest HT (A2)	Unambiguous	SGGKIEVIAHNELSGR		1	ACRE_091090	ACRE_091090	1	3	0.6901	0	1	1	556.301	1666.89	1666.89	1.13	0.00063	CID (Collision Induced Dissociation)	MS2	25.1907	19.256	56.2028	12543	CCAB-2a3-2.raw	F587	4.13	1
FALSE	High	Sequest HT (A2)	Unambiguous	TNNLGDAVVIQQK		1	ACRE_091090	ACRE_091090	0	2	0.5327	0	1	1	700.38	1399.75	1399.75	-1.53	-0.00107	CID (Collision Induced Dissociation)	MS2	33.7881	18.191	33.4681	5516	CCAB-3a3-2.raw	F595	4.13	1
FALSE	High	Sequest HT (A2)	Unambiguous	TNNLGDAVVIQQK		1	ACRE_091090	ACRE_091090	0	2	0.5036	0	1	1	700.382	1399.76	1399.75	2.45	0.00171	CID (Collision Induced Dissociation)	MS2	2.06174	0.101	34.4909	6254	CCAB-4a2-2.raw	F599	4.13	1
FALSE	High	Sequest HT (A2)	Unambiguous	SGGKIEVIAHNELSGR		1	ACRE_091090	ACRE_091090	1	3	0.6796	0	1	1	556.301	1666.89	1666.89	1.15	0.00064	CID (Collision Induced Dissociation)	MS2	14.0385	28.358	56.0674	12330	CCAB-3a3-2.raw	F595	4.12	1
FALSE	High	Sequest HT (A2)	Unambiguous	FYNVVNDEADEDED		1	ACRE_091090	ACRE_091090	0	2	0.8641	0	1	1	837.333	1673.66	1673.64	8.15	0.00682	CID (Collision Induced Dissociation)	MS2	55.7738	43.808	36.1542	6630	CCAB-2a3-2.raw	F587	4.12	1
FALSE	High	Sequest HT (A2)	Unambiguous	SGGKIEVIAHNELSGR		1	ACRE_091090	ACRE_091090	1	3	0.6107	0	1	1	556.3	1666.89	1666.89	-0.4	-0.00022	CID (Collision Induced Dissociation)	MS2	25.0503	150	62.2887	13673	CCAB-3a3-2.raw	F595	4.11	1
FALSE	High	Sequest HT (A2)	Unambiguous	FYNVVNDEADEDED		1	ACRE_091090	ACRE_091090	0	2	0.871	0	1	1	837.328	1673.65	1673.64	1.73	0.00145	CID (Collision Induced Dissociation)	MS2	16.9546	150	34.1255	4664	CCAB-1a.raw	F578	4.11	1
FALSE	High	Sequest HT (A2)	Unambiguous	TNNLGDAVVIQQK		1	ACRE_091090	ACRE_091090	0	2	0.5839	0	1	1	700.379	1399.75	1399.75	-2.4	-0.00168	CID (Collision Induced Dissociation)	MS2	34.6308	137.014	27.8549	4796	WT-a.raw	F635	4.11	1
FALSE	High	Sequest HT (A2)	Unambiguous	FIINASQPANDKIFDVSAFEK		1	ACRE_091090	ACRE_091090	1	2	0.5255	0	1	1	1177.61	2354.21	2354.2	1.92	0.00226	CID (Collision Induced Dissociation)	MS2	0	42.941	48.71	11296	CCAB-4a2-2.raw	F599	4.11	1
FALSE	High	Sequest HT (A2)	Unambiguous	SGGKIEVIAHNELSGR		1	ACRE_091090	ACRE_091090	1	4	0.5805	0	1	1	417.478	1666.89	1666.89	1.08	0.00045	CID (Collision Induced Dissociation)	MS2	13.4441	86.279	55.3857	12176	CCAB-3a3-2.raw	F595	4.1	1
FALSE	High	Sequest HT (A2)	Unambiguous	SGGKIEVIAHNELSGR		1	ACRE_091090	ACRE_091090	1	3	0.6381	0	1	1	556.301	1666.89	1666.89	1.18	0.00065	CID (Collision Induced Dissociation)	MS2	38.5731	29.312	47.1995	10855	CCAB-4a2-2.raw	F599	4.09	1
FALSE	High	Sequest HT (A2)	Unambiguous	TNNLGDAVVIQQK		1	ACRE_091090	ACRE_091090	0	2	0.5086	0	1	1	700.382	1399.76	1399.75	1.81	0.00127	CID (Collision Induced Dissociation)	MS2	0.404052	0.143	34.7658	6121	CCAB-2a3-2.raw	F587	4.09	1
FALSE	High	Sequest HT (A2)	Unambiguous	TNNLGDAVVIQQK		1	ACRE_091090	ACRE_091090	0	2	0.4621	0	1	1	700.381	1399.75	1399.75	-0.02	-1e-05	CID (Collision Induced Dissociation)	MS2	54.8569	70.259	33.8762	4868	CCAB-4a2.raw	F598	4.09	1
FALSE	High	Sequest HT (A2)	Unambiguous	SGGKIEVIAHNELSGR		1	ACRE_091090	ACRE_091090	1	3	0.5501	0	1	1	556.301	1666.89	1666.89	0	0	CID (Collision Induced Dissociation)	MS2	29.4071	23.51	46.032	9865	CCAB-3a3-2.raw	F595	4.09	1
FALSE	High	Sequest HT (A2)	Unambiguous	FYNVVNDEADEDED		1	ACRE_091090	ACRE_091090	0	2	0.8603	0	1	1	837.326	1673.65	1673.64	0.37	0.00031	CID (Collision Induced Dissociation)	MS2	11.3372	27.578	37.8253	6897	CCAB-3a2-2.raw	F593	4.08	1
FALSE	High	Sequest HT (A2)	Unambiguous	SGGKIEVIAHNELSGR		1	ACRE_091090	ACRE_091090	1	3	0.6961	0	1	1	556.3	1666.89	1666.89	-0.13	-7e-05	CID (Collision Induced Dissociation)	MS2	24.0749	13.952	48.0461	10606	CCAB-2a3-2.raw	F587	4.08	1
FALSE	High	Sequest HT (A2)	Unambiguous	SGGKIEVIAHNELSGR		1	ACRE_091090	ACRE_091090	1	4	0.576	0	1	1	417.478	1666.89	1666.89	2.13	0.00089	CID (Collision Induced Dissociation)	MS2	51.4849	150	48.6497	8640	CCAB-3a3.raw	F594	4.08	1
FALSE	High	Sequest HT (A2)	Unambiguous	FYNVVNDEADEDED		1	ACRE_091090	ACRE_091090	0	2	0.8133	0	1	1	837.326	1673.64	1673.64	-0.11	-9e-05	CID (Collision Induced Dissociation)	MS2	23.3064	150	31.8904	5832	WT-a.raw	F635	4.07	1
FALSE	High	Sequest HT (A2)	Unambiguous	SGGKIEVIAHNELSGR		1	ACRE_091090	ACRE_091090	1	3	0.6658	0	1	1	556.3	1666.89	1666.89	-0.14	-8e-05	CID (Collision Induced Dissociation)	MS2	31.3532	77.242	58.0174	13663	CCAB-4a2-2.raw	F599	4.07	1
FALSE	High	Sequest HT (A2)	Unambiguous	KFIINASQPANDK		1	ACRE_091090	ACRE_091090	1	2	0.4433	0	1	1	723.389	1445.77	1445.77	-2.2	-0.00159	CID (Collision Induced Dissociation)	MS2	30.0251	15.892	33.1344	5520	CCAB-2a3-2.raw	F587	4.06	1
FALSE	High	Sequest HT (A2)	Unambiguous	SGGKIEVIAHNELSGR		1	ACRE_091090	ACRE_091090	1	3	0.5172	0	1	1	556.3	1666.89	1666.89	-1.04	-0.00058	CID (Collision Induced Dissociation)	MS2	38.3637	33.961	48.7893	11322	CCAB-4a2-2.raw	F599	4.06	1
FALSE	High	Sequest HT (A2)	Unambiguous	SGGKIEVIAHNELSGR		1	ACRE_091090	ACRE_091090	1	3	0.6667	0	1	1	556.3	1666.89	1666.89	-0.14	-8e-05	CID (Collision Induced Dissociation)	MS2	39.2202	150	57.4493	11544	CCAB-4a1-2.raw	F597	4.05	1
FALSE	High	Sequest HT (A2)	Unambiguous	FYNVVNDEADEDED		1	ACRE_091090	ACRE_091090	0	2	0.8642	0	1	1	837.328	1673.65	1673.64	2.23	0.00186	CID (Collision Induced Dissociation)	MS2	1.23533	0.737	36.9241	6911	CCAB-2a3-2.raw	F587	4.05	1
FALSE	High	Sequest HT (A2)	Unambiguous	TNNLGDAVVIQQK		1	ACRE_091090	ACRE_091090	0	2	0.4691	0	1	1	700.379	1399.75	1399.75	-2.52	-0.00176	CID (Collision Induced Dissociation)	MS2	52.5138	20.311	35.9257	6269	CCAB-3a2-2.raw	F593	4.05	1
FALSE	High	Sequest HT (A2)	Unambiguous	SGGKIEVIAHNELSGR		1	ACRE_091090	ACRE_091090	1	4	0.5383	0	1	1	417.477	1666.89	1666.89	-0.63	-0.00026	CID (Collision Induced Dissociation)	MS2	58.9024	150	45.0968	7810	CCAB-3a3.raw	F594	4.05	1
FALSE	High	Sequest HT (A2)	Unambiguous	KFIINASQPANDKIFDVSAFEK		1	ACRE_091090	ACRE_091090	2	3	0.5136	0	1	1	828.103	2482.29	2482.3	-1.7	-0.00141	CID (Collision Induced Dissociation)	MS2	34.5886	36.84	50.15	11849	CCAB-4a2-2.raw	F599	4.05	1
FALSE	High	Sequest HT (A2)	Unambiguous	TNNLGDAVVIQQK		1	ACRE_091090	ACRE_091090	0	2	0.5062	0	1	1	700.38	1399.75	1399.75	-0.87	-0.00061	CID (Collision Induced Dissociation)	MS2	22.3625	75.677	33.653	4739	CCAB-3a3.raw	F594	4.05	1
FALSE	High	Sequest HT (A2)	Unambiguous	FIINASQPANDK		1	ACRE_091090	ACRE_091090	0	2	0.5877	0	1	1	659.345	1317.68	1317.68	1.77	0.00117	CID (Collision Induced Dissociation)	MS2	2.26591	14.131	35.4284	5308	CCAB-4a2.raw	F598	4.05	1
FALSE	High	Sequest HT (A2)	Unambiguous	SGGKIEVIAHNELSGR		1	ACRE_091090	ACRE_091090	1	3	0.6386	0	1	1	556.301	1666.89	1666.89	0.11	6e-05	CID (Collision Induced Dissociation)	MS2	25.0221	101.593	56.6456	11366	CCAB-4a1-2.raw	F597	4.04	1
FALSE	High	Sequest HT (A2)	Unambiguous	TNNLGDAVVIQQK		1	ACRE_091090	ACRE_091090	0	2	0.4888	0	1	1	700.379	1399.75	1399.75	-2.28	-0.0016	CID (Collision Induced Dissociation)	MS2	50.4861	61.535	35.9939	5391	CCAB-3a3.raw	F594	4.03	1
FALSE	High	Sequest HT (A2)	Unambiguous	SGGKIEVIAHNELSGR		1	ACRE_091090	ACRE_091090	1	4	0.6278	0	1	1	417.478	1666.89	1666.89	1.08	0.00045	CID (Collision Induced Dissociation)	MS2	14.9214	24.674	48.8217	10817	CCAB-2a3-2.raw	F587	4.03	1
FALSE	High	Sequest HT (A2)	Unambiguous	KFIINASQPANDK		1	ACRE_091090	ACRE_091090	1	2	0.3995	0	1	1	723.391	1445.78	1445.77	0.33	0.00024	CID (Collision Induced Dissociation)	MS2	33.3502	24.139	34.059	5615	CCAB-3a2-2.raw	F593	4.03	1
FALSE	High	Sequest HT (A2)	Unambiguous	TNNLGDAVVIQQK		1	ACRE_091090	ACRE_091090	0	2	0.5186	0	1	1	700.381	1399.76	1399.75	1.07	0.00075	CID (Collision Induced Dissociation)	MS2	38.6959	11.457	35.7233	6476	CCAB-2a3-2.raw	F587	4.03	1
FALSE	High	Sequest HT (A2)	Unambiguous	KFIINASQPANDKIFDVSAFEK		1	ACRE_091090	ACRE_091090	2	3	0.6244	0	1	1	828.107	2482.31	2482.3	3.52	0.00291	CID (Collision Induced Dissociation)	MS2	21.7012	150	54.0915	12067	CCAB-2a3-2.raw	F587	4.02	1
FALSE	High	Sequest HT (A2)	Unambiguous	SGGKIEVIAHNELSGR		1	ACRE_091090	ACRE_091090	1	4	0.5945	0	1	1	417.478	1666.89	1666.89	1.39	0.00058	CID (Collision Induced Dissociation)	MS2	13.2404	52.614	56.9568	12532	CCAB-3a3-2.raw	F595	4.02	1
FALSE	High	Sequest HT (A2)	Unambiguous	SGGKIEVIAHNELSGR		1	ACRE_091090	ACRE_091090	1	3	0.6683	0	1	1	556.301	1666.89	1666.89	0.08	5e-05	CID (Collision Induced Dissociation)	MS2	36.3559	28.955	45.1929	9630	CCAB-3a3-2.raw	F595	4.01	1
FALSE	High	Sequest HT (A2)	Unambiguous	SGGKIEVIAHNELSGR		1	ACRE_091090	ACRE_091090	1	3	0.6234	0	1	1	556.3	1666.88	1666.89	-1.82	-0.00101	CID (Collision Induced Dissociation)	MS2	68.3783	48.14	44.1133	9288	CCAB-3a3-2.raw	F595	4.01	1
FALSE	High	Sequest HT (A2)	Unambiguous	SGGKIEVIAHNELSGR		1	ACRE_091090	ACRE_091090	1	4	0.585	0	1	1	417.477	1666.89	1666.89	0.02	1e-05	CID (Collision Induced Dissociation)	MS2	43.8353	41.383	42.5738	8941	CCAB-2a3-2.raw	F587	4	1
FALSE	High	Sequest HT (A2)	Unambiguous	KFIINASQPANDK		1	ACRE_091090	ACRE_091090	1	2	0.495	0	1	1	723.39	1445.77	1445.77	-1.04	-0.00075	CID (Collision Induced Dissociation)	MS2	13.3215	24.243	33.9219	5816	CCAB-2a3-2.raw	F587	4	1
FALSE	High	Sequest HT (A2)	Unambiguous	SGGKIEVIAHNELSGR		1	ACRE_091090	ACRE_091090	1	3	0.5575	0	1	1	556.299	1666.88	1666.89	-1.98	-0.0011	CID (Collision Induced Dissociation)	MS2	37.4222	150	47.1047	8281	CCAB-3a3.raw	F594	4	1
FALSE	High	Sequest HT (A2)	Unambiguous	FIINASQPANDKIFDVSAFEK		1	ACRE_091090	ACRE_091090	1	2	0.62	0	1	1	1177.6	2354.2	2354.2	-1.05	-0.00123	CID (Collision Induced Dissociation)	MS2	57.8402	150	49.0869	10692	CCAB-3a3-2.raw	F595	4	1
FALSE	High	Sequest HT (A2)	Unambiguous	SGGKIEVIAHNELSGR		1	ACRE_091090	ACRE_091090	1	3	0.655	0	1	1	556.301	1666.89	1666.89	0.94	0.00052	CID (Collision Induced Dissociation)	MS2	14.5655	150	58.1633	10635	CCAB-3a3.raw	F594	4	1
FALSE	High	Sequest HT (A2)	Unambiguous	SGGKIEVIAHNELSGR		1	ACRE_091090	ACRE_091090	1	3	0.6341	0	1	1	556.302	1666.89	1666.89	2.14	0.00119	CID (Collision Induced Dissociation)	MS2	65.8654	150	54.4974	11980	CCAB-3a3-2.raw	F595	3.99	1
FALSE	High	Sequest HT (A2)	Unambiguous	SGGKIEVIAHNELSGR		1	ACRE_091090	ACRE_091090	1	3	0.6432	0	1	1	556.301	1666.89	1666.89	0.58	0.00032	CID (Collision Induced Dissociation)	MS2	26.9267	42.48	57.2275	13485	CCAB-4a2-2.raw	F599	3.98	1
FALSE	High	Sequest HT (A2)	Unambiguous	SGGKIEVIAHNELSGR		1	ACRE_091090	ACRE_091090	1	3	0.6181	0	1	1	556.3	1666.89	1666.89	-1.14	-0.00064	CID (Collision Induced Dissociation)	MS2	34.0922	132.308	47.821	8767	CCAB-4a3-2.raw	F601	3.98	1
FALSE	High	Sequest HT (A2)	Unambiguous	TNNLGDAVVIQQK		1	ACRE_091090	ACRE_091090	0	2	0.4497	0	1	1	700.379	1399.75	1399.75	-2.03	-0.00142	CID (Collision Induced Dissociation)	MS2	68.0731	150	36.1945	5531	CCAB-4a2.raw	F598	3.98	1
FALSE	High	Sequest HT (A2)	Unambiguous	SGGKIEVIAHNELSGR		1	ACRE_091090	ACRE_091090	1	3	0.5503	0	1	1	556.301	1666.89	1666.89	0.3	0.00016	CID (Collision Induced Dissociation)	MS2	29.9065	150	59.7645	12041	CCAB-4a1-2.raw	F597	3.98	1
FALSE	High	Sequest HT (A2)	Unambiguous	TNNLGDAVVIQQK		1	ACRE_091090	ACRE_091090	0	2	0.5176	0	1	1	700.379	1399.75	1399.75	-2.01	-0.00141	CID (Collision Induced Dissociation)	MS2	38.2798	34.65	36.5604	6775	CCAB-2a3-2.raw	F587	3.98	1
FALSE	High	Sequest HT (A2)	Unambiguous	SGGKIEVIAHNELSGR		1	ACRE_091090	ACRE_091090	1	2	0.6146	0	1	1	833.946	1666.89	1666.89	-0.94	-0.00078	CID (Collision Induced Dissociation)	MS2	57.8856	150	46.8117	10264	CCAB-2a3-2.raw	F587	3.97	1
FALSE	High	Sequest HT (A2)	Unambiguous	SGGKIEVIAHNELSGR		1	ACRE_091090	ACRE_091090	1	4	0.6247	0	1	1	417.478	1666.89	1666.89	1.77	0.00074	CID (Collision Induced Dissociation)	MS2	53.9115	141.838	57.0941	13455	CCAB-4a2-2.raw	F599	3.97	1
FALSE	High	Sequest HT (A2)	Unambiguous	FIINASQPANDKIFDVSAFEK		1	ACRE_091090	ACRE_091090	1	3	0.601	0	1	1	785.406	2354.2	2354.2	-0.02	-1e-05	CID (Collision Induced Dissociation)	MS2	13.0168	7.498	49.3691	11525	CCAB-4a2-2.raw	F599	3.96	1
FALSE	High	Sequest HT (A2)	Unambiguous	FYNVVNDEADEDED		1	ACRE_091090	ACRE_091090	0	2	0.8662	0	1	1	837.325	1673.64	1673.64	-1.3	-0.00109	CID (Collision Induced Dissociation)	MS2	5.04837	42.591	37.2144	6025	CCAB-4a3-2.raw	F601	3.96	1
FALSE	High	Sequest HT (A2)	Unambiguous	SGGKIEVIAHNELSGR		1	ACRE_091090	ACRE_091090	1	3	0.6111	0	1	1	556.301	1666.89	1666.89	1.43	0.0008	CID (Collision Induced Dissociation)	MS2	55.8562	150	54.1085	10384	WT-a.raw	F635	3.96	1
FALSE	High	Sequest HT (A2)	Unambiguous	SGGKIEVIAHNELSGR		1	ACRE_091090	ACRE_091090	1	3	0.6061	0	1	1	556.301	1666.89	1666.89	0.9	0.0005	CID (Collision Induced Dissociation)	MS2	12.3183	150	47.9163	8470	CCAB-3a3.raw	F594	3.96	1
FALSE	High	Sequest HT (A2)	Unambiguous	KFIINASQPANDKIFDVSAFEK		1	ACRE_091090	ACRE_091090	2	3	0.6338	0	1	1	828.105	2482.3	2482.3	1.16	0.00096	CID (Collision Induced Dissociation)	MS2	38.1687	150	44.1038	7069	CCAB-1a.raw	F578	3.96	1
FALSE	High	Sequest HT (A2)	Unambiguous	SGGKIEVIAHNELSGR		1	ACRE_091090	ACRE_091090	1	3	0.5367	0	1	1	556.301	1666.89	1666.89	1.24	0.00069	CID (Collision Induced Dissociation)	MS2	23.9594	124.183	44.7216	7720	CCAB-3a3.raw	F594	3.95	1
FALSE	High	Sequest HT (A2)	Unambiguous	SGGKIEVIAHNELSGR		1	ACRE_091090	ACRE_091090	1	4	0.5671	0	1	1	417.477	1666.89	1666.89	0.26	0.00011	CID (Collision Induced Dissociation)	MS2	30.5538	31.407	48.0574	10611	CCAB-2a3-2.raw	F587	3.95	1
FALSE	High	Sequest HT (A2)	Unambiguous	SGGKIEVIAHNELSGR		1	ACRE_091090	ACRE_091090	1	3	0.6	0	1	1	556.301	1666.89	1666.89	1.2	0.00067	CID (Collision Induced Dissociation)	MS2	28.7465	49.257	48.0263	11095	CCAB-4a2-2.raw	F599	3.95	1
FALSE	High	Sequest HT (A2)	Unambiguous	FIINASQPANDK		1	ACRE_091090	ACRE_091090	0	2	0.562	0	1	1	659.342	1317.68	1317.68	-2.16	-0.00142	CID (Collision Induced Dissociation)	MS2	59.7086	38.233	35.21	6159	CCAB-3a3-2.raw	F595	3.95	1
FALSE	High	Sequest HT (A2)	Unambiguous	KFIINASQPANDKIFDVSAFEK		1	ACRE_091090	ACRE_091090	2	3	0.5863	0	1	1	828.103	2482.29	2482.3	-1.34	-0.00111	CID (Collision Induced Dissociation)	MS2	49.2445	43.853	49.3101	10970	CCAB-2a3-2.raw	F587	3.94	1
FALSE	High	Sequest HT (A2)	Unambiguous	SGGKIEVIAHNELSGR		1	ACRE_091090	ACRE_091090	1	3	0.632	0	1	1	556.3	1666.89	1666.89	-1.01	-0.00056	CID (Collision Induced Dissociation)	MS2	21.7907	136.445	59.9877	13201	CCAB-3a3-2.raw	F595	3.94	1
FALSE	High	Sequest HT (A2)	Unambiguous	FYNVVNDEADEDED		1	ACRE_091090	ACRE_091090	0	2	0.8782	0	1	1	837.326	1673.65	1673.64	0.3	0.00025	CID (Collision Induced Dissociation)	MS2	25.1706	120.696	37.3061	5645	CCAB-3a2.raw	F592	3.94	1
FALSE	High	Sequest HT (A2)	Unambiguous	SGGKIEVIAHNELSGR		1	ACRE_091090	ACRE_091090	1	3	0.6802	0	1	1	556.301	1666.89	1666.89	0.6	0.00033	CID (Collision Induced Dissociation)	MS2	23.7858	44.58	55.6492	13123	CCAB-4a2-2.raw	F599	3.94	1
FALSE	High	Sequest HT (A2)	Unambiguous	KFIINASQPANDKIFDVSAFEK		1	ACRE_091090	ACRE_091090	2	3	0.6447	0	1	1	828.104	2482.3	2482.3	-0.01	-1e-05	CID (Collision Induced Dissociation)	MS2	45.8365	150	51.4911	9491	CCAB-4a2.raw	F598	3.94	1
FALSE	High	Sequest HT (A2)	Unambiguous	SGGKIEVIAHNELSGR		1	ACRE_091090	ACRE_091090	1	3	0.6336	0	1	1	556.301	1666.89	1666.89	0.47	0.00026	CID (Collision Induced Dissociation)	MS2	29.1233	150	47.1624	8418	CCAB-4a2.raw	F598	3.93	1
FALSE	High	Sequest HT (A2)	Unambiguous	SGGKIEVIAHNELSGR		1	ACRE_091090	ACRE_091090	1	3	0.5751	0	1	1	556.3	1666.89	1666.89	-0.41	-0.00023	CID (Collision Induced Dissociation)	MS2	37.9815	150	56.3054	10393	CCAB-4a2.raw	F598	3.93	1
FALSE	High	Sequest HT (A2)	Unambiguous	FIINASQPANDK		1	ACRE_091090	ACRE_091090	0	2	0.6031	0	1	1	659.344	1317.68	1317.68	1.2	0.00079	CID (Collision Induced Dissociation)	MS2	1.20437	2.421	34.9695	6445	CCAB-4a2-2.raw	F599	3.93	1
FALSE	High	Sequest HT (A2)	Unambiguous	SGGKIEVIAHNELSGR		1	ACRE_091090	ACRE_091090	1	2	0.7354	0	1	1	833.947	1666.89	1666.89	-0.42	-0.00035	CID (Collision Induced Dissociation)	MS2	27.888	150	57.0511	12554	CCAB-3a3-2.raw	F595	3.93	1
FALSE	High	Sequest HT (A2)	Unambiguous	SGGKIEVIAHNELSGR		1	ACRE_091090	ACRE_091090	1	3	0.6896	0	1	1	556.3	1666.89	1666.89	-1.22	-0.00068	CID (Collision Induced Dissociation)	MS2	50.5054	150	58.215	11713	CCAB-4a1-2.raw	F597	3.93	1
FALSE	High	Sequest HT (A2)	Unambiguous	FYNVVNDEADEDED		1	ACRE_091090	ACRE_091090	0	2	0.7735	0	1	1	837.326	1673.65	1673.64	0.32	0.00027	CID (Collision Induced Dissociation)	MS2	31.9453	147.926	36.4884	5806	CCAB-4a3-2.raw	F601	3.93	1
FALSE	High	Sequest HT (A2)	Unambiguous	FYNVVNDEADEDED		1	ACRE_091090	ACRE_091090	0	2	0.8041	0	1	1	837.325	1673.64	1673.64	-1.75	-0.00146	CID (Collision Induced Dissociation)	MS2	49.187	150	32.7163	6041	WT-a.raw	F635	3.93	1
FALSE	High	Sequest HT (A2)	Unambiguous	TNNLGDAVVIQQK		1	ACRE_091090	ACRE_091090	0	2	0.4668	0	1	1	700.379	1399.75	1399.75	-1.7	-0.00119	CID (Collision Induced Dissociation)	MS2	43.4395	62.144	33.206	5547	CCAB-2a3-2.raw	F587	3.92	1
FALSE	High	Sequest HT (A2)	Unambiguous	KFIINASQPANDKIFDVSAFEK		1	ACRE_091090	ACRE_091090	2	3	0.5128	0	1	1	828.105	2482.3	2482.3	0.73	0.00061	CID (Collision Induced Dissociation)	MS2	78.5456	20.404	50.114	11262	CCAB-2a3-2.raw	F587	3.92	1
FALSE	High	Sequest HT (A2)	Unambiguous	SGGKIEVIAHNELSGR		1	ACRE_091090	ACRE_091090	1	4	0.5255	0	1	1	417.478	1666.89	1666.89	2.46	0.00103	CID (Collision Induced Dissociation)	MS2	36.8822	150	59.3228	13059	CCAB-3a3-2.raw	F595	3.92	1
FALSE	High	Sequest HT (A2)	Unambiguous	SGGKIEVIAHNELSGR		1	ACRE_091090	ACRE_091090	1	3	0.5575	0	1	1	556.301	1666.89	1666.89	0.92	0.00051	CID (Collision Induced Dissociation)	MS2	40.6435	150	49.4843	7454	CCAB-4a3.raw	F600	3.91	1
FALSE	High	Sequest HT (A2)	Unambiguous	FYNVVNDEADEDED		1	ACRE_091090	ACRE_091090	0	2	0.8772	0	1	1	837.327	1673.65	1673.64	1.03	0.00087	CID (Collision Induced Dissociation)	MS2	39.5725	47.731	37.0053	6620	CCAB-3a2-2.raw	F593	3.91	1
FALSE	High	Sequest HT (A2)	Unambiguous	SGGKIEVIAHNELSGR		1	ACRE_091090	ACRE_091090	1	3	0.6471	0	1	1	556.301	1666.89	1666.89	1.33	0.00074	CID (Collision Induced Dissociation)	MS2	15.8275	150	60.7625	13366	CCAB-3a3-2.raw	F595	3.91	1
FALSE	High	Sequest HT (A2)	Unambiguous	SGGKIEVIAHNELSGR		1	ACRE_091090	ACRE_091090	1	3	0.5294	0	1	1	556.301	1666.89	1666.89	0.92	0.00051	CID (Collision Induced Dissociation)	MS2	42.188	150	56.8379	8661	CCAB-4a3.raw	F600	3.91	1
FALSE	High	Sequest HT (A2)	Unambiguous	SGGKIEVIAHNELSGR		1	ACRE_091090	ACRE_091090	1	3	0.6343	0	1	1	556.302	1666.89	1666.89	2.31	0.00128	CID (Collision Induced Dissociation)	MS2	33.5857	150	61.5282	13523	CCAB-3a3-2.raw	F595	3.91	1
FALSE	High	Sequest HT (A2)	Unambiguous	SGGKIEVIAHNELSGR		1	ACRE_091090	ACRE_091090	1	3	0.5217	0	1	1	556.301	1666.89	1666.89	0.91	0.00051	CID (Collision Induced Dissociation)	MS2	48.8307	150	58.9963	11881	CCAB-4a1-2.raw	F597	3.91	1
FALSE	High	Sequest HT (A2)	Unambiguous	TNNLGDAVVIQQK		1	ACRE_091090	ACRE_091090	0	2	0.5385	0	1	1	700.381	1399.75	1399.75	0.41	0.00028	CID (Collision Induced Dissociation)	MS2	35.817	150	62.624	13739	CCAB-3a3-2.raw	F595	3.9	1
FALSE	High	Sequest HT (A2)	Unambiguous	TNNLGDAVVIQQK		1	ACRE_091090	ACRE_091090	0	2	0.4974	0	1	1	700.382	1399.76	1399.75	1.51	0.00106	CID (Collision Induced Dissociation)	MS2	16.8924	0.332	34.7652	5863	CCAB-3a2-2.raw	F593	3.9	1
FALSE	High	Sequest HT (A2)	Unambiguous	SGGKIEVIAHNELSGR		1	ACRE_091090	ACRE_091090	1	4	0.5974	0	1	1	417.477	1666.89	1666.89	0.39	0.00016	CID (Collision Induced Dissociation)	MS2	64.3609	79.857	45.7037	10405	CCAB-4a2-2.raw	F599	3.9	1
FALSE	High	Sequest HT (A2)	Unambiguous	FYNVVNDEADEDED		1	ACRE_091090	ACRE_091090	0	2	0.856	0	1	1	837.324	1673.64	1673.64	-2.35	-0.00197	CID (Collision Induced Dissociation)	MS2	11.4393	150	37.4144	5418	CCAB-4a1.raw	F596	3.89	1
FALSE	High	Sequest HT (A2)	Unambiguous	KFIINASQPANDK		1	ACRE_091090	ACRE_091090	1	2	0.437	0	1	1	723.391	1445.77	1445.77	0.13	9e-05	CID (Collision Induced Dissociation)	MS2	49.8246	150	32.4847	4341	CCAB-3a2.raw	F592	3.89	1
FALSE	High	Sequest HT (A2)	Unambiguous	TNNLGDAVVIQQK		1	ACRE_091090	ACRE_091090	0	2	0.5424	0	1	1	700.38	1399.75	1399.75	-1.18	-0.00082	CID (Collision Induced Dissociation)	MS2	33.449	150	33.8083	3826	CCAB-4a3.raw	F600	3.89	1
FALSE	High	Sequest HT (A2)	Unambiguous	SGGKIEVIAHNELSGR		1	ACRE_091090	ACRE_091090	1	3	0.5928	0	1	1	556.302	1666.89	1666.89	1.75	0.00097	CID (Collision Induced Dissociation)	MS2	41.6883	150	60.304	12150	CCAB-4a1-2.raw	F597	3.88	1
FALSE	High	Sequest HT (A2)	Unambiguous	SGGKIEVIAHNELSGR		1	ACRE_091090	ACRE_091090	1	3	0.5825	0	1	1	556.302	1666.89	1666.89	2.03	0.00113	CID (Collision Induced Dissociation)	MS2	35.8288	134.224	58.7931	13836	CCAB-4a2-2.raw	F599	3.88	1
FALSE	High	Sequest HT (A2)	Unambiguous	SGGKIEVIAHNELSGR		1	ACRE_091090	ACRE_091090	1	2	0.7416	0	1	1	833.947	1666.89	1666.89	-0.39	-0.00032	CID (Collision Induced Dissociation)	MS2	42.1224	150	57.4684	10488	CCAB-3a3.raw	F594	3.87	1
FALSE	High	Sequest HT (A2)	Unambiguous	SGGKIEVIAHNELSGR		1	ACRE_091090	ACRE_091090	1	4	0.5736	0	1	1	417.477	1666.89	1666.89	-0.41	-0.00017	CID (Collision Induced Dissociation)	MS2	47.9166	89.618	48.1594	11136	CCAB-4a2-2.raw	F599	3.87	1
FALSE	High	Sequest HT (A2)	Unambiguous	SGGKIEVIAHNELSGR		1	ACRE_091090	ACRE_091090	1	4	0.553	0	1	1	417.478	1666.89	1666.89	1.58	0.00066	CID (Collision Induced Dissociation)	MS2	23.5629	28.819	49.6058	11078	CCAB-2a3-2.raw	F587	3.87	1
FALSE	High	Sequest HT (A2)	Unambiguous	FYNVVNDEADEDED		1	ACRE_091090	ACRE_091090	0	2	0.7927	0	1	1	837.324	1673.64	1673.64	-2.53	-0.00212	CID (Collision Induced Dissociation)	MS2	37.962	150	38.5386	6195	CCAB-4a2.raw	F598	3.86	1
FALSE	High	Sequest HT (A2)	Unambiguous	FYNVVNDEADEDED		1	ACRE_091090	ACRE_091090	0	2	0.8549	0	1	1	837.329	1673.65	1673.64	2.99	0.00251	CID (Collision Induced Dissociation)	MS2	0.0995754	5.152	37.5878	4742	CCAB-4a3.raw	F600	3.86	1
FALSE	High	Sequest HT (A2)	Unambiguous	IEVIAHNELSGR		1	ACRE_091090	ACRE_091090	0	2	0.6458	0	1	1	669.363	1337.72	1337.72	1.43	0.00096	CID (Collision Induced Dissociation)	MS2	9.03846	5.025	34.2421	5802	CCAB-3a3-2.raw	F595	3.84	1
FALSE	High	Sequest HT (A2)	Unambiguous	SGGKIEVIAHNELSGR		1	ACRE_091090	ACRE_091090	1	2	0.6771	0	1	1	833.947	1666.89	1666.89	-0.07	-6e-05	CID (Collision Induced Dissociation)	MS2	78.9959	150	56.4048	12592	CCAB-2a3-2.raw	F587	3.84	1
FALSE	High	Sequest HT (A2)	Unambiguous	TNNLGDAVVIQQK		1	ACRE_091090	ACRE_091090	0	2	0.4948	0	1	1	700.379	1399.75	1399.75	-2.53	-0.00177	CID (Collision Induced Dissociation)	MS2	48.2445	55.105	36.389	5775	CCAB-4a3-2.raw	F601	3.84	1
FALSE	High	Sequest HT (A2)	Unambiguous	TNNLGDAVVIQQK		1	ACRE_091090	ACRE_091090	0	2	0.5405	0	1	1	700.38	1399.75	1399.75	-0.36	-0.00025	CID (Collision Induced Dissociation)	MS2	21.4295	33.991	36.8206	6748	CCAB-3a3-2.raw	F595	3.83	1
FALSE	High	Sequest HT (A2)	Unambiguous	SGGKIEVIAHNELSGR		1	ACRE_091090	ACRE_091090	1	4	0.5483	0	1	1	417.477	1666.89	1666.89	0.3	0.00012	CID (Collision Induced Dissociation)	MS2	23.5954	150	57.5181	10498	CCAB-3a3.raw	F594	3.83	1
FALSE	High	Sequest HT (A2)	Unambiguous	SGGKIEVIAHNELSGR		1	ACRE_091090	ACRE_091090	1	3	0.6319	0	1	1	556.301	1666.89	1666.89	1.45	0.0008	CID (Collision Induced Dissociation)	MS2	28.0572	35.616	57.7557	12898	CCAB-2a3-2.raw	F587	3.83	1
FALSE	High	Sequest HT (A2)	Unambiguous	TNNLGDAVVIQQK		1	ACRE_091090	ACRE_091090	0	2	0.4987	0	1	1	700.38	1399.75	1399.75	-1.14	-0.0008	CID (Collision Induced Dissociation)	MS2	52.0323	8.246	35.6092	6698	CCAB-4a2-2.raw	F599	3.83	1
FALSE	High	Sequest HT (A2)	Unambiguous	FYNVVNDEADEDED		1	ACRE_091090	ACRE_091090	0	2	0.8564	0	1	1	837.328	1673.65	1673.64	2.56	0.00214	CID (Collision Induced Dissociation)	MS2	0.247974	1.045	37.6166	5935	CCAB-4a2.raw	F598	3.83	1
FALSE	High	Sequest HT (A2)	Unambiguous	SGGKIEVIAHNELSGR		1	ACRE_091090	ACRE_091090	1	3	0.6162	0	1	1	556.3	1666.89	1666.89	-0.75	-0.00041	CID (Collision Induced Dissociation)	MS2	28.9056	150	58.6645	10761	CCAB-4a3-2.raw	F601	3.83	1
FALSE	High	Sequest HT (A2)	Unambiguous	SGGKIEVIAHNELSGR		1	ACRE_091090	ACRE_091090	1	3	0.6789	0	1	1	556.301	1666.89	1666.89	1.06	0.00059	CID (Collision Induced Dissociation)	MS2	55.1716	150	56.0701	8515	CCAB-4a3.raw	F600	3.83	1
FALSE	High	Sequest HT (A2)	Unambiguous	SGGKIEVIAHNELSGR		1	ACRE_091090	ACRE_091090	1	3	0.534	0	1	1	556.301	1666.89	1666.89	0.87	0.00049	CID (Collision Induced Dissociation)	MS2	20.2636	12.834	49.673	10887	CCAB-3a3-2.raw	F595	3.82	1
FALSE	High	Sequest HT (A2)	Unambiguous	TNNLGDAVVIQQK		1	ACRE_091090	ACRE_091090	0	2	0.4084	0	1	1	700.381	1399.76	1399.75	1.05	0.00073	CID (Collision Induced Dissociation)	MS2	52.374	18.381	35.6176	5543	CCAB-4a3-2.raw	F601	3.82	1
FALSE	High	Sequest HT (A2)	Unambiguous	SGGKIEVIAHNELSGR		1	ACRE_091090	ACRE_091090	1	3	0.5801	0	1	1	556.301	1666.89	1666.89	0.51	0.00028	CID (Collision Induced Dissociation)	MS2	30.7249	133.999	43.9441	7515	CCAB-3a3.raw	F594	3.81	1
FALSE	High	Sequest HT (A2)	Unambiguous	TNNLGDAVVIQQK		1	ACRE_091090	ACRE_091090	0	2	0.5118	0	1	1	700.38	1399.75	1399.75	-0.5	-0.00035	CID (Collision Induced Dissociation)	MS2	57.5	150	63.7266	13951	CCAB-3a3-2.raw	F595	3.81	1
FALSE	High	Sequest HT (A2)	Unambiguous	FIINASQPANDK		1	ACRE_091090	ACRE_091090	0	2	0.5512	0	1	1	659.345	1317.68	1317.68	1.67	0.0011	CID (Collision Induced Dissociation)	MS2	1.4975	1.644	35.0132	5351	CCAB-4a3-2.raw	F601	3.81	1
FALSE	High	Sequest HT (A2)	Unambiguous	FIINASQPANDKIFDVSAFEK		1	ACRE_091090	ACRE_091090	1	3	0.5395	0	1	1	785.406	2354.2	2354.2	0.69	0.00054	CID (Collision Induced Dissociation)	MS2	12.2966	40.853	42.5429	8447	WT-a.raw	F635	3.8	1
FALSE	High	Sequest HT (A2)	Unambiguous	FIINASQPANDKIFDVSAFEK		1	ACRE_091090	ACRE_091090	1	3	0.5658	0	1	1	785.405	2354.2	2354.2	-1.04	-0.00082	CID (Collision Induced Dissociation)	MS2	39.3073	109.318	48.8375	10623	CCAB-3a3-2.raw	F595	3.8	1
FALSE	High	Sequest HT (A2)	Unambiguous	SGGKIEVIAHNELSGR		1	ACRE_091090	ACRE_091090	1	3	0.6447	0	1	1	556.301	1666.89	1666.89	1.02	0.00056	CID (Collision Induced Dissociation)	MS2	33.0615	22.469	55.412	12363	CCAB-2a3-2.raw	F587	3.8	1
FALSE	High	Sequest HT (A2)	Unambiguous	SGGKIEVIAHNELSGR		1	ACRE_091090	ACRE_091090	1	3	0.6132	0	1	1	556.301	1666.89	1666.89	-0.03	-1e-05	CID (Collision Induced Dissociation)	MS2	20.7447	150	59.9068	10972	CCAB-3a3.raw	F594	3.8	1
FALSE	High	Sequest HT (A2)	Unambiguous	SGGKIEVIAHNELSGR		1	ACRE_091090	ACRE_091090	1	4	0.6121	0	1	1	417.478	1666.89	1666.89	2.3	0.00096	CID (Collision Induced Dissociation)	MS2	29.7453	118.732	59.3157	13243	CCAB-2a3-2.raw	F587	3.79	1
FALSE	High	Sequest HT (A2)	Unambiguous	FYNVVNDEADEDED		1	ACRE_091090	ACRE_091090	0	2	0.81	0	1	1	837.325	1673.64	1673.64	-1.04	-0.00087	CID (Collision Induced Dissociation)	MS2	17.4887	91.8	38.755	7466	CCAB-3a3-2.raw	F595	3.79	1
FALSE	High	Sequest HT (A2)	Unambiguous	FIINASQPANDK		1	ACRE_091090	ACRE_091090	0	2	0.5937	0	1	1	659.344	1317.68	1317.68	1.24	0.00082	CID (Collision Induced Dissociation)	MS2	1.96825	1.37	35.1495	6268	CCAB-2a3-2.raw	F587	3.79	1
FALSE	High	Sequest HT (A2)	Unambiguous	TNNLGDAVVIQQK		1	ACRE_091090	ACRE_091090	0	2	0.4577	0	1	1	700.383	1399.76	1399.75	3.27	0.00229	CID (Collision Induced Dissociation)	MS2	82.9089	36.924	33.4686	5415	CCAB-3a2-2.raw	F593	3.78	1
FALSE	High	Sequest HT (A2)	Unambiguous	KFIINASQPANDKIFDVSAFEK		1	ACRE_091090	ACRE_091090	2	3	0.5767	0	1	1	828.108	2482.31	2482.3	5.02	0.00415	CID (Collision Induced Dissociation)	MS2	43.3327	150	51.3623	9464	CCAB-4a2.raw	F598	3.78	1
FALSE	High	Sequest HT (A2)	Unambiguous	KFIINASQPANDK		1	ACRE_091090	ACRE_091090	1	2	0.4138	0	1	1	723.391	1445.78	1445.77	0.37	0.00027	CID (Collision Induced Dissociation)	MS2	34.7242	141.513	35.369	5467	CCAB-4a3-2.raw	F601	3.77	1
FALSE	High	Sequest HT (A2)	Unambiguous	FYNVVNDEADEDED		1	ACRE_091090	ACRE_091090	0	2	0.809	0	1	1	837.324	1673.64	1673.64	-1.99	-0.00166	CID (Collision Induced Dissociation)	MS2	44.4788	19.071	37.7146	7209	CCAB-2a3-2.raw	F587	3.77	1
FALSE	High	Sequest HT (A2)	Unambiguous	SGGKIEVIAHNELSGR		1	ACRE_091090	ACRE_091090	1	3	0.496	0	1	1	556.3	1666.89	1666.89	-0.88	-0.00049	CID (Collision Induced Dissociation)	MS2	42.1231	28.399	46.4325	10626	CCAB-4a2-2.raw	F599	3.77	1
FALSE	High	Sequest HT (A2)	Unambiguous	SGGKIEVIAHNELSGR		1	ACRE_091090	ACRE_091090	1	3	0.5426	0	1	1	556.3	1666.89	1666.89	-0.99	-0.00055	CID (Collision Induced Dissociation)	MS2	47.9201	150	60.8297	11123	CCAB-4a3-2.raw	F601	3.76	1
FALSE	High	Sequest HT (A2)	Unambiguous	FYNVVNDEADEDED		1	ACRE_091090	ACRE_091090	0	2	0.7893	0	1	1	837.326	1673.65	1673.64	0.24	0.0002	CID (Collision Induced Dissociation)	MS2	16.6157	150	38.1973	5883	CCAB-3a2.raw	F592	3.75	1
FALSE	High	Sequest HT (A2)	Unambiguous	KFIINASQPANDK		1	ACRE_091090	ACRE_091090	1	2	0.3947	0	1	1	723.389	1445.77	1445.77	-2.09	-0.00151	CID (Collision Induced Dissociation)	MS2	31.3465	150	33.8165	3828	CCAB-4a3.raw	F600	3.75	1
FALSE	High	Sequest HT (A2)	Unambiguous	SGGKIEVIAHNELSGR		1	ACRE_091090	ACRE_091090	1	2	0.7112	0	1	1	833.947	1666.89	1666.89	-0.14	-0.00012	CID (Collision Induced Dissociation)	MS2	17.7857	150	57.8371	12733	CCAB-3a3-2.raw	F595	3.74	1
FALSE	High	Sequest HT (A2)	Unambiguous	TNNLGDAVVIQQK		1	ACRE_091090	ACRE_091090	0	2	0.4385	0	1	1	700.381	1399.75	1399.75	0.6	0.00042	CID (Collision Induced Dissociation)	MS2	47.8394	7.463	34.706	6379	CCAB-3a1-2.raw	F591	3.74	1
FALSE	High	Sequest HT (A2)	Unambiguous	SGGKIEVIAHNELSGR		1	ACRE_091090	ACRE_091090	1	3	0.6417	0	1	1	556.3	1666.89	1666.89	-1.14	-0.00063	CID (Collision Induced Dissociation)	MS2	43.0243	150	50.7145	9138	CCAB-3a3.raw	F594	3.74	1
FALSE	High	Sequest HT (A2)	Unambiguous	SGGKIEVIAHNELSGR		1	ACRE_091090	ACRE_091090	1	3	0.6524	0	1	1	556.301	1666.89	1666.89	0.35	0.00019	CID (Collision Induced Dissociation)	MS2	17.5516	43.532	56.4663	13311	CCAB-4a2-2.raw	F599	3.74	1
FALSE	High	Sequest HT (A2)	Unambiguous	FIINASQPANDK		1	ACRE_091090	ACRE_091090	0	2	0.5523	0	1	1	659.345	1317.68	1317.68	1.77	0.00117	CID (Collision Induced Dissociation)	MS2	1.37958	19.294	35.2516	5099	CCAB-3a2.raw	F592	3.73	1
FALSE	High	Sequest HT (A2)	Unambiguous	KFIINASQPANDK		1	ACRE_091090	ACRE_091090	1	2	0.4316	0	1	1	723.39	1445.77	1445.77	-1.47	-0.00106	CID (Collision Induced Dissociation)	MS2	70.0539	30.894	33.7223	5964	CCAB-4a2-2.raw	F599	3.73	1
FALSE	High	Sequest HT (A2)	Unambiguous	FYNVVNDEADEDED		1	ACRE_091090	ACRE_091090	0	2	0.7105	0	1	1	837.326	1673.64	1673.64	-0.41	-0.00034	CID (Collision Induced Dissociation)	MS2	60.485	117.849	38.483	6180	CCAB-4a2.raw	F598	3.73	1
FALSE	High	Sequest HT (A2)	Unambiguous	SGGKIEVIAHNELSGR		1	ACRE_091090	ACRE_091090	1	2	0.7185	0	1	1	833.947	1666.89	1666.89	0.37	0.00031	CID (Collision Induced Dissociation)	MS2	52.2317	150	55.2791	12331	CCAB-2a3-2.raw	F587	3.73	1
FALSE	High	Sequest HT (A2)	Unambiguous	SGGKIEVIAHNELSGR		1	ACRE_091090	ACRE_091090	1	2	0.6381	0	1	1	833.947	1666.89	1666.89	-0.77	-0.00064	CID (Collision Induced Dissociation)	MS2	66.0916	150	47.9937	10401	CCAB-3a3-2.raw	F595	3.73	1
FALSE	High	Sequest HT (A2)	Unambiguous	SGGKIEVIAHNELSGR		1	ACRE_091090	ACRE_091090	1	3	0.4745	0	1	1	556.299	1666.88	1666.89	-2.04	-0.00113	CID (Collision Induced Dissociation)	MS2	80.9051	150	64.3097	14053	CCAB-3a3-2.raw	F595	3.73	1
FALSE	High	Sequest HT (A2)	Unambiguous	SGGKIEVIAHNELSGR		1	ACRE_091090	ACRE_091090	1	3	0.4933	0	1	1	556.301	1666.89	1666.89	-0.05	-3e-05	CID (Collision Induced Dissociation)	MS2	48.2957	150	43.4123	6128	CCAB-4a3.raw	F600	3.73	1
FALSE	High	Sequest HT (A2)	Unambiguous	TNNLGDAVVIQQK		1	ACRE_091090	ACRE_091090	0	2	0.5013	0	1	1	700.382	1399.76	1399.75	1.31	0.00091	CID (Collision Induced Dissociation)	MS2	0.591157	1.087	35.1006	6113	CCAB-3a3-2.raw	F595	3.73	1
FALSE	High	Sequest HT (A2)	Unambiguous	SGGKIEVIAHNELSGR		1	ACRE_091090	ACRE_091090	1	3	0.4677	0	1	1	556.301	1666.89	1666.89	0.57	0.00031	CID (Collision Induced Dissociation)	MS2	29.5179	125.669	45.4827	7902	CCAB-3a3.raw	F594	3.72	1
FALSE	High	Sequest HT (A2)	Unambiguous	KFIINASQPANDK		1	ACRE_091090	ACRE_091090	1	2	0.4946	0	1	1	723.391	1445.78	1445.77	0.26	0.00019	CID (Collision Induced Dissociation)	MS2	6.96931	51.604	32.5229	4417	CCAB-3a3.raw	F594	3.72	1
FALSE	High	Sequest HT (A2)	Unambiguous	SGGKIEVIAHNELSGR		1	ACRE_091090	ACRE_091090	1	4	0.6048	0	1	1	417.478	1666.89	1666.89	1.33	0.00055	CID (Collision Induced Dissociation)	MS2	40.2397	28.213	44.9303	9718	CCAB-2a3-2.raw	F587	3.72	1
FALSE	High	Sequest HT (A2)	Unambiguous	SGGKIEVIAHNELSGR		1	ACRE_091090	ACRE_091090	1	2	0.6828	0	1	1	833.949	1666.89	1666.89	1.83	0.00152	CID (Collision Induced Dissociation)	MS2	74.1855	150	55.6001	12407	CCAB-2a3-2.raw	F587	3.72	1
FALSE	High	Sequest HT (A2)	Unambiguous	SGGKIEVIAHNELSGR		1	ACRE_091090	ACRE_091090	1	4	0.5457	0	1	1	417.478	1666.89	1666.89	0.86	0.00036	CID (Collision Induced Dissociation)	MS2	17.3786	84.788	57.7205	12707	CCAB-3a3-2.raw	F595	3.72	1
FALSE	High	Sequest HT (A2)	Unambiguous	SGGKIEVIAHNELSGR		1	ACRE_091090	ACRE_091090	1	3	0.5822	0	1	1	556.3	1666.89	1666.89	-0.88	-0.00049	CID (Collision Induced Dissociation)	MS2	48.6389	106.113	54.8414	12939	CCAB-4a2-2.raw	F599	3.71	1
FALSE	High	Sequest HT (A2)	Unambiguous	SGGKIEVIAHNELSGR		1	ACRE_091090	ACRE_091090	1	3	0.5256	0	1	1	556.3	1666.89	1666.89	-0.88	-0.00049	CID (Collision Induced Dissociation)	MS2	52.0574	150	45.5775	8040	CCAB-4a2.raw	F598	3.71	1
FALSE	High	Sequest HT (A2)	Unambiguous	SGGKIEVIAHNELSGR		1	ACRE_091090	ACRE_091090	1	3	0.4297	0	1	1	556.301	1666.89	1666.89	-0.03	-1e-05	CID (Collision Induced Dissociation)	MS2	57.552	150	63.0507	13823	CCAB-3a3-2.raw	F595	3.7	1
FALSE	High	Sequest HT (A2)	Unambiguous	SGGKIEVIAHNELSGR		1	ACRE_091090	ACRE_091090	1	4	0.5486	0	1	1	417.478	1666.89	1666.89	0.86	0.00036	CID (Collision Induced Dissociation)	MS2	27.6712	53.575	47.1045	10164	CCAB-3a3-2.raw	F595	3.7	1
FALSE	High	Sequest HT (A2)	Unambiguous	SGGKIEVIAHNELSGR		1	ACRE_091090	ACRE_091090	1	2	0.6973	0	1	1	833.945	1666.88	1666.89	-2.99	-0.00249	CID (Collision Induced Dissociation)	MS2	72.6629	150	57.9251	12753	CCAB-3a3-2.raw	F595	3.7	1
FALSE	High	Sequest HT (A2)	Unambiguous	SGGKIEVIAHNELSGR		1	ACRE_091090	ACRE_091090	1	3	0.6196	0	1	1	556.3	1666.89	1666.89	-0.58	-0.00032	CID (Collision Induced Dissociation)	MS2	51.4695	150	60.8489	13571	CCAB-2a3-2.raw	F587	3.68	1
FALSE	High	Sequest HT (A2)	Unambiguous	TNNLGDAVVIQQK		1	ACRE_091090	ACRE_091090	0	2	0.6549	0	1	1	700.372	1399.74	1399.75	-12.47	-0.00873	CID (Collision Induced Dissociation)	MS2	70.1817	150	36.6254	5467	CCAB-3a2.raw	F592	3.68	1
FALSE	High	Sequest HT (A2)	Unambiguous	SGGKIEVIAHNELSGR		1	ACRE_091090	ACRE_091090	1	4	0.6739	0	1	1	417.478	1666.89	1666.89	0.96	0.0004	CID (Collision Induced Dissociation)	MS2	19.8066	58.733	57.6965	12884	CCAB-2a3-2.raw	F587	3.68	1
FALSE	High	Sequest HT (A2)	Unambiguous	IEVIAHNELSGR		1	ACRE_091090	ACRE_091090	0	2	0.6349	0	1	1	669.362	1337.72	1337.72	-0.14	-9e-05	CID (Collision Induced Dissociation)	MS2	40.9211	7.51	34.6521	6081	CCAB-2a3-2.raw	F587	3.67	1
FALSE	High	Sequest HT (A2)	Unambiguous	TNNLGDAVVIQQK		1	ACRE_091090	ACRE_091090	0	3	0.5068	0	1	1	467.257	1399.76	1399.75	1.72	0.0008	CID (Collision Induced Dissociation)	MS2	1.64312	0.824	34.4926	6255	CCAB-4a2-2.raw	F599	3.67	1
FALSE	High	Sequest HT (A2)	Unambiguous	SGGKIEVIAHNELSGR		1	ACRE_091090	ACRE_091090	1	4	0.6512	0	1	1	417.478	1666.89	1666.89	1.29	0.00054	CID (Collision Induced Dissociation)	MS2	15.7228	74.208	58.4975	13062	CCAB-2a3-2.raw	F587	3.67	1
FALSE	High	Sequest HT (A2)	Unambiguous	SGGKIEVIAHNELSGR		1	ACRE_091090	ACRE_091090	1	3	0.485	0	1	1	556.3	1666.88	1666.89	-1.8	-0.001	CID (Collision Induced Dissociation)	MS2	78.7412	150	62.1836	14560	CCAB-4a2-2.raw	F599	3.67	1
FALSE	High	Sequest HT (A2)	Unambiguous	SGGKIEVIAHNELSGR		1	ACRE_091090	ACRE_091090	1	3	0.594	0	1	1	556.301	1666.89	1666.89	0.12	7e-05	CID (Collision Induced Dissociation)	MS2	52.8873	149.31	55.5914	10143	CCAB-4a3-2.raw	F601	3.67	1
FALSE	High	Sequest HT (A2)	Unambiguous	SGGKIEVIAHNELSGR		1	ACRE_091090	ACRE_091090	1	3	0.5246	0	1	1	556.3	1666.89	1666.89	-0.82	-0.00046	CID (Collision Induced Dissociation)	MS2	41.8114	47.206	43.5704	9121	CCAB-3a3-2.raw	F595	3.66	1
FALSE	High	Sequest HT (A2)	Unambiguous	SGGKIEVIAHNELSGR		1	ACRE_091090	ACRE_091090	1	3	0.5671	0	1	1	556.301	1666.89	1666.89	0.14	8e-05	CID (Collision Induced Dissociation)	MS2	46.6739	150	42.2974	7214	CCAB-4a2.raw	F598	3.65	1
FALSE	High	Sequest HT (A2)	Unambiguous	SGGKIEVIAHNELSGR		1	ACRE_091090	ACRE_091090	1	3	0.5644	0	1	1	556.3	1666.89	1666.89	-0.64	-0.00035	CID (Collision Induced Dissociation)	MS2	33.429	150	56.7022	8633	CCAB-4a3.raw	F600	3.65	1
FALSE	High	Sequest HT (A2)	Unambiguous	TNNLGDAVVIQQK		1	ACRE_091090	ACRE_091090	0	2	0.4231	0	1	1	700.38	1399.75	1399.75	-1.19	-0.00083	CID (Collision Induced Dissociation)	MS2	51.2735	48.666	34.8043	4741	CCAB-4a1.raw	F596	3.64	1
FALSE	High	Sequest HT (A2)	Unambiguous	TNNLGDAVVIQQK		1	ACRE_091090	ACRE_091090	0	2	0.4258	0	1	1	700.38	1399.75	1399.75	-0.33	-0.00023	CID (Collision Induced Dissociation)	MS2	39.8701	10.38	34.7357	5468	CCAB-4a1-2.raw	F597	3.64	1
FALSE	High	Sequest HT (A2)	Unambiguous	SGGKIEVIAHNELSGR		1	ACRE_091090	ACRE_091090	1	4	0.5372	0	1	1	417.478	1666.89	1666.89	1.01	0.00042	CID (Collision Induced Dissociation)	MS2	23.0532	47.763	55.338	12344	CCAB-2a3-2.raw	F587	3.63	1
FALSE	High	Sequest HT (A2)	Unambiguous	KFIINASQPANDK		1	ACRE_091090	ACRE_091090	1	2	0.489	0	1	1	723.39	1445.77	1445.77	-0.88	-0.00064	CID (Collision Induced Dissociation)	MS2	50.6348	150	27.4996	4702	WT-a.raw	F635	3.62	1
FALSE	High	Sequest HT (A2)	Unambiguous	FYNVVNDEADEDED		1	ACRE_091090	ACRE_091090	0	2	0.8508	0	1	1	837.326	1673.65	1673.64	0.35	0.0003	CID (Collision Induced Dissociation)	MS2	26.8583	82.268	38.56	7844	CCAB-4a2-2.raw	F599	3.62	1
FALSE	High	Sequest HT (A2)	Unambiguous	TNNLGDAVVIQQK		1	ACRE_091090	ACRE_091090	0	2	0.4309	0	1	1	700.38	1399.75	1399.75	-0.78	-0.00055	CID (Collision Induced Dissociation)	MS2	61.4543	72.159	36.7123	6528	CCAB-3a2-2.raw	F593	3.62	1
FALSE	High	Sequest HT (A2)	Unambiguous	TNNLGDAVVIQQK		1	ACRE_091090	ACRE_091090	0	2	0.4669	0	1	1	700.38	1399.75	1399.75	-1.24	-0.00087	CID (Collision Induced Dissociation)	MS2	41.7759	37.431	33.1894	4790	CCAB-4a3-2.raw	F601	3.62	1
FALSE	High	Sequest HT (A2)	Unambiguous	SGGKIEVIAHNELSGR		1	ACRE_091090	ACRE_091090	1	4	0.511	0	1	1	417.477	1666.89	1666.89	-0.1	-4e-05	CID (Collision Induced Dissociation)	MS2	31.7858	59.564	46.2719	9935	CCAB-3a3-2.raw	F595	3.62	1
FALSE	High	Sequest HT (A2)	Unambiguous	SGGKIEVIAHNELSGR		1	ACRE_091090	ACRE_091090	1	3	0.6094	0	1	1	556.301	1666.89	1666.89	0.93	0.00052	CID (Collision Induced Dissociation)	MS2	9.36881	150	58.3503	10674	CCAB-3a3.raw	F594	3.61	1
FALSE	High	Sequest HT (A2)	Unambiguous	SGGKIEVIAHNELSGR		1	ACRE_091090	ACRE_091090	1	2	0.6953	0	1	1	833.948	1666.89	1666.89	1.15	0.00096	CID (Collision Induced Dissociation)	MS2	53.2923	150	58.4473	13051	CCAB-2a3-2.raw	F587	3.61	1
FALSE	High	Sequest HT (A2)	Unambiguous	SGGKIEVIAHNELSGR		1	ACRE_091090	ACRE_091090	1	3	0.5402	0	1	1	556.303	1666.9	1666.89	4.98	0.00277	CID (Collision Induced Dissociation)	MS2	45.3518	150	60.3944	14189	CCAB-4a2-2.raw	F599	3.61	1
FALSE	High	Sequest HT (A2)	Unambiguous	FYNVVNDEADEDED		1	ACRE_091090	ACRE_091090	0	2	0.8389	0	1	1	837.328	1673.65	1673.64	1.91	0.0016	CID (Collision Induced Dissociation)	MS2	0.031134	0.247	36.9435	7220	CCAB-4a2-2.raw	F599	3.6	1
FALSE	High	Sequest HT (A2)	Unambiguous	SGGKIEVIAHNELSGR		1	ACRE_091090	ACRE_091090	1	3	0.5417	0	1	1	556.3	1666.88	1666.89	-1.55	-0.00086	CID (Collision Induced Dissociation)	MS2	60.9192	150	57.0713	10541	CCAB-4a2.raw	F598	3.6	1
FALSE	High	Sequest HT (A2)	Unambiguous	TNNLGDAVVIQQK		1	ACRE_091090	ACRE_091090	0	2	0.5222	0	1	1	700.383	1399.76	1399.75	3.74	0.00261	CID (Collision Induced Dissociation)	MS2	0.421457	0.434	34.86	5067	CCAB-3a3.raw	F594	3.6	1
FALSE	High	Sequest HT (A2)	Unambiguous	FYNVVNDEADEDED		1	ACRE_091090	ACRE_091090	0	2	0.8222	0	1	1	837.324	1673.64	1673.64	-3.06	-0.00256	CID (Collision Induced Dissociation)	MS2	43.4336	149.244	36.7612	5607	CCAB-3a3.raw	F594	3.6	1
FALSE	High	Sequest HT (A2)	Unambiguous	KFIINASQPANDK		1	ACRE_091090	ACRE_091090	1	2	0.4639	0	1	1	723.39	1445.77	1445.77	-1.28	-0.00092	CID (Collision Induced Dissociation)	MS2	53.687	43.442	34.493	5194	CCAB-4a3-2.raw	F601	3.6	1
FALSE	High	Sequest HT (A2)	Unambiguous	SGGKIEVIAHNELSGR		1	ACRE_091090	ACRE_091090	1	4	0.493	0	1	1	417.477	1666.89	1666.89	0.46	0.00019	CID (Collision Induced Dissociation)	MS2	36.8464	50.292	47.8893	10373	CCAB-3a3-2.raw	F595	3.59	1
FALSE	High	Sequest HT (A2)	Unambiguous	FIINASQPANDKIFDVSAFEK		1	ACRE_091090	ACRE_091090	1	3	0.5905	0	1	1	785.405	2354.2	2354.2	-0.86	-0.00067	CID (Collision Induced Dissociation)	MS2	15.3952	98.505	48.1025	8513	CCAB-3a3.raw	F594	3.59	1
FALSE	High	Sequest HT (A2)	Unambiguous	FIINASQPANDK		1	ACRE_091090	ACRE_091090	0	2	0.5404	0	1	1	659.343	1317.68	1317.68	-0.68	-0.00045	CID (Collision Induced Dissociation)	MS2	53.3004	9.786	35.7856	6367	CCAB-3a3-2.raw	F595	3.59	1
FALSE	High	Sequest HT (A2)	Unambiguous	TNNLGDAVVIQQK		1	ACRE_091090	ACRE_091090	0	3	0.581	0	1	1	467.257	1399.76	1399.75	1.38	0.00064	CID (Collision Induced Dissociation)	MS2	1.26775	0.56	34.7725	5987	CCAB-3a3-2.raw	F595	3.58	1
FALSE	High	Sequest HT (A2)	Unambiguous	TNNLGDAVVIQQK		1	ACRE_091090	ACRE_091090	0	3	0.5559	0	1	1	467.257	1399.76	1399.75	1.67	0.00078	CID (Collision Induced Dissociation)	MS2	3.10578	7.846	34.981	5181	CCAB-4a2.raw	F598	3.58	1
FALSE	High	Sequest HT (A2)	Unambiguous	SGGKIEVIAHNELSGR		1	ACRE_091090	ACRE_091090	1	3	0.6592	0	1	1	556.301	1666.89	1666.89	0.07	4e-05	CID (Collision Induced Dissociation)	MS2	22.2224	150	55.8913	10154	CCAB-3a3.raw	F594	3.58	1
FALSE	High	Sequest HT (A2)	Unambiguous	IEVIAHNELSGR		1	ACRE_091090	ACRE_091090	0	2	0.5922	0	1	1	669.362	1337.72	1337.72	-0.19	-0.00013	CID (Collision Induced Dissociation)	MS2	11.6357	26.15	33.4843	4690	CCAB-3a3.raw	F594	3.58	1
FALSE	High	Sequest HT (A2)	Unambiguous	SGGKIEVIAHNELSGR		1	ACRE_091090	ACRE_091090	1	3	0.5686	0	1	1	556.3	1666.89	1666.89	-0.23	-0.00013	CID (Collision Induced Dissociation)	MS2	36.3421	150	47.9062	7111	CCAB-4a3.raw	F600	3.57	1
FALSE	High	Sequest HT (A2)	Unambiguous	TNNLGDAVVIQQK		1	ACRE_091090	ACRE_091090	0	2	0.423	0	1	1	700.38	1399.75	1399.75	-0.21	-0.00014	CID (Collision Induced Dissociation)	MS2	44.3434	32.286	36.4484	7022	CCAB-4a2-2.raw	F599	3.57	1
FALSE	High	Sequest HT (A2)	Unambiguous	SGGKIEVIAHNELSGR		1	ACRE_091090	ACRE_091090	1	3	0.6208	0	1	1	556.3	1666.89	1666.89	-0.51	-0.00028	CID (Collision Induced Dissociation)	MS2	58.9631	87.647	54.6099	12180	CCAB-2a3-2.raw	F587	3.56	1
FALSE	High	Sequest HT (A2)	Unambiguous	FIINASQPANDKIFDVSAFEK		1	ACRE_091090	ACRE_091090	1	3	0.5337	0	1	1	785.405	2354.2	2354.2	-0.98	-0.00077	CID (Collision Induced Dissociation)	MS2	6.88144	150	48.7944	8982	CCAB-4a3-2.raw	F601	3.56	1
FALSE	High	Sequest HT (A2)	Unambiguous	SGGKIEVIAHNELSGR		1	ACRE_091090	ACRE_091090	1	3	0.4592	0	1	1	556.301	1666.89	1666.89	0.14	8e-05	CID (Collision Induced Dissociation)	MS2	41.9455	32.072	44.3732	9369	CCAB-3a3-2.raw	F595	3.55	1
FALSE	High	Sequest HT (A2)	Unambiguous	TNNLGDAVVIQQK		1	ACRE_091090	ACRE_091090	0	2	0.5831	0	1	1	700.38	1399.75	1399.75	-0.97	-0.00068	CID (Collision Induced Dissociation)	MS2	13.0072	150	64.7715	14126	CCAB-3a3-2.raw	F595	3.55	1
FALSE	High	Sequest HT (A2)	Unambiguous	SGGKIEVIAHNELSGR		1	ACRE_091090	ACRE_091090	1	3	0.5408	0	1	1	556.3	1666.89	1666.89	-0.55	-0.00031	CID (Collision Induced Dissociation)	MS2	45.402	150	46.378	8233	CCAB-4a2.raw	F598	3.55	1
FALSE	High	Sequest HT (A2)	Unambiguous	SGGKIEVIAHNELSGR		1	ACRE_091090	ACRE_091090	1	3	0.6141	0	1	1	556.301	1666.89	1666.89	1.18	0.00066	CID (Collision Induced Dissociation)	MS2	32.5834	89.851	49.4213	9125	CCAB-4a3-2.raw	F601	3.55	1
FALSE	High	Sequest HT (A2)	Unambiguous	SGGKIEVIAHNELSGR		1	ACRE_091090	ACRE_091090	1	4	0.6282	0	1	1	417.478	1666.89	1666.89	2.28	0.00095	CID (Collision Induced Dissociation)	MS2	53.4447	72.313	43.5835	9695	CCAB-4a2-2.raw	F599	3.55	1
FALSE	High	Sequest HT (A2)	Unambiguous	SGGKIEVIAHNELSGR		1	ACRE_091090	ACRE_091090	1	3	0.4873	0	1	1	556.301	1666.89	1666.89	0.17	9e-05	CID (Collision Induced Dissociation)	MS2	35.878	150	56.6244	11632	CCAB-3a2-2.raw	F593	3.55	1
FALSE	High	Sequest HT (A2)	Unambiguous	SGGKIEVIAHNELSGR		1	ACRE_091090	ACRE_091090	1	3	0.5493	0	1	1	556.3	1666.89	1666.89	-0.41	-0.00023	CID (Collision Induced Dissociation)	MS2	31.8678	104.922	48.6218	8944	CCAB-4a3-2.raw	F601	3.55	1
FALSE	High	Sequest HT (A2)	Unambiguous	SGGKIEVIAHNELSGR		1	ACRE_091090	ACRE_091090	1	3	0.5339	0	1	1	556.301	1666.89	1666.89	-0.01	-1e-05	CID (Collision Induced Dissociation)	MS2	43.4469	150	59.1587	8992	CCAB-4a3.raw	F600	3.54	1
FALSE	High	Sequest HT (A2)	Unambiguous	FIINASQPANDK		1	ACRE_091090	ACRE_091090	0	2	0.5311	0	1	1	659.344	1317.68	1317.68	0.5	0.00033	CID (Collision Induced Dissociation)	MS2	60.3814	150	36.196	5359	CCAB-3a2.raw	F592	3.54	1
FALSE	High	Sequest HT (A2)	Unambiguous	SGGKIEVIAHNELSGR		1	ACRE_091090	ACRE_091090	1	4	0.5791	0	1	1	417.478	1666.89	1666.89	1.82	0.00076	CID (Collision Induced Dissociation)	MS2	42.8075	150	60.2707	13260	CCAB-3a3-2.raw	F595	3.54	1
FALSE	High	Sequest HT (A2)	Unambiguous	SGGKIEVIAHNELSGR		1	ACRE_091090	ACRE_091090	1	3	0.6412	0	1	1	556.301	1666.89	1666.89	1.16	0.00065	CID (Collision Induced Dissociation)	MS2	29.1505	108.597	55.8619	11191	CCAB-4a1-2.raw	F597	3.54	1
FALSE	High	Sequest HT (A2)	Unambiguous	TNNLGDAVVIQQK		1	ACRE_091090	ACRE_091090	0	2	0.4589	0	1	1	700.38	1399.75	1399.75	-0.97	-0.00068	CID (Collision Induced Dissociation)	MS2	18.8072	150	63.9649	13996	CCAB-3a3-2.raw	F595	3.53	1
FALSE	High	Sequest HT (A2)	Unambiguous	SGGKIEVIAHNELSGR		1	ACRE_091090	ACRE_091090	1	3	0.5597	0	1	1	556.299	1666.88	1666.89	-3.48	-0.00193	CID (Collision Induced Dissociation)	MS2	46.1711	150	59.4244	10928	CCAB-4a2.raw	F598	3.52	1
FALSE	High	Sequest HT (A2)	Unambiguous	TNNLGDAVVIQQK		1	ACRE_091090	ACRE_091090	0	2	0.4843	0	1	1	700.381	1399.75	1399.75	0.33	0.00023	CID (Collision Induced Dissociation)	MS2	71.3504	150	62.9507	13803	CCAB-3a3-2.raw	F595	3.51	1
FALSE	High	Sequest HT (A2)	Unambiguous	SGGKIEVIAHNELSGR		1	ACRE_091090	ACRE_091090	1	3	0.56	0	1	1	556.3	1666.88	1666.89	-1.47	-0.00082	CID (Collision Induced Dissociation)	MS2	20.6963	150	60.1239	11008	CCAB-4a2.raw	F598	3.5	1
FALSE	High	Sequest HT (A2)	Unambiguous	TNNLGDAVVIQQK		1	ACRE_091090	ACRE_091090	0	3	0.4714	0	1	1	467.256	1399.75	1399.75	0.5	0.00023	CID (Collision Induced Dissociation)	MS2	4.87181	2.573	34.7685	5865	CCAB-3a2-2.raw	F593	3.5	1
FALSE	High	Sequest HT (A2)	Unambiguous	SGGKIEVIAHNELSGR		1	ACRE_091090	ACRE_091090	1	4	0.6114	0	1	1	417.477	1666.89	1666.89	0.55	0.00023	CID (Collision Induced Dissociation)	MS2	24.3368	114.594	58.4927	12878	CCAB-3a3-2.raw	F595	3.5	1
FALSE	High	Sequest HT (A2)	Unambiguous	SGGKIEVIAHNELSGR		1	ACRE_091090	ACRE_091090	1	3	0.4886	0	1	1	556.299	1666.88	1666.89	-1.9	-0.00106	CID (Collision Induced Dissociation)	MS2	17.8878	150	58.6046	10813	CCAB-4a2.raw	F598	3.5	1
FALSE	High	Sequest HT (A2)	Unambiguous	SGGKIEVIAHNELSGR		1	ACRE_091090	ACRE_091090	1	3	0.6286	0	1	1	556.301	1666.89	1666.89	0.37	0.00021	CID (Collision Induced Dissociation)	MS2	34.8409	79.425	59.3094	13241	CCAB-2a3-2.raw	F587	3.5	1
FALSE	High	Sequest HT (A2)	Unambiguous	SGGKIEVIAHNELSGR		1	ACRE_091090	ACRE_091090	1	3	0.6857	0	1	1	556.301	1666.89	1666.89	1.49	0.00083	CID (Collision Induced Dissociation)	MS2	25.1624	25.263	56.9842	12725	CCAB-2a3-2.raw	F587	3.5	1
FALSE	High	Sequest HT (A2)	Unambiguous	SGGKIEVIAHNELSGR		1	ACRE_091090	ACRE_091090	1	3	0.54	0	1	1	556.3	1666.88	1666.89	-1.32	-0.00073	CID (Collision Induced Dissociation)	MS2	39.9509	150	50.373	9060	CCAB-3a3.raw	F594	3.5	1
FALSE	High	Sequest HT (A2)	Unambiguous	SGGKIEVIAHNELSGR		1	ACRE_091090	ACRE_091090	1	3	0.616	0	1	1	556.301	1666.89	1666.89	0.22	0.00012	CID (Collision Induced Dissociation)	MS2	53.3587	150	54.0761	8544	CCAB-1a.raw	F578	3.49	1
FALSE	High	Sequest HT (A2)	Unambiguous	SGGKIEVIAHNELSGR		1	ACRE_091090	ACRE_091090	1	4	0.5759	0	1	1	417.477	1666.89	1666.89	0.07	3e-05	CID (Collision Induced Dissociation)	MS2	50.3753	28.981	43.3568	9206	CCAB-2a3-2.raw	F587	3.49	1
FALSE	High	Sequest HT (A2)	Unambiguous	IEVIAHNELSGR		1	ACRE_091090	ACRE_091090	0	2	0.5072	0	1	1	669.361	1337.71	1337.72	-2.02	-0.00135	CID (Collision Induced Dissociation)	MS2	38.9565	28.139	35.6138	6435	CCAB-2a3-2.raw	F587	3.49	1
FALSE	High	Sequest HT (A2)	Unambiguous	TNNLGDAVVIQQK		1	ACRE_091090	ACRE_091090	0	3	0.5301	0	1	1	467.256	1399.75	1399.75	0.16	7e-05	CID (Collision Induced Dissociation)	MS2	1.01454	1.766	34.4742	5184	CCAB-4a3-2.raw	F601	3.49	1
FALSE	High	Sequest HT (A2)	Unambiguous	FIINASQPANDKIFDVSAFEK		1	ACRE_091090	ACRE_091090	1	3	0.6361	0	1	1	785.406	2354.2	2354.2	0.34	0.00027	CID (Collision Induced Dissociation)	MS2	9.88674	8.668	48.7383	10794	CCAB-2a3-2.raw	F587	3.49	1
FALSE	High	Sequest HT (A2)	Unambiguous	FYNVVNDEADEDED		1	ACRE_091090	ACRE_091090	0	2	0.8822	0	1	1	837.324	1673.64	1673.64	-2.11	-0.00176	CID (Collision Induced Dissociation)	MS2	22.5814	150	36.8618	5719	CCAB-4a2.raw	F598	3.48	1
FALSE	High	Sequest HT (A2)	Unambiguous	TNNLGDAVVIQQK		1	ACRE_091090	ACRE_091090	0	2	0.4282	0	1	1	700.38	1399.75	1399.75	-1.19	-0.00083	CID (Collision Induced Dissociation)	MS2	62.5726	64.229	33.4311	5503	CCAB-3a3-2.raw	F595	3.48	1
FALSE	High	Sequest HT (A2)	Unambiguous	SGGKIEVIAHNELSGR		1	ACRE_091090	ACRE_091090	1	4	0.5389	0	1	1	417.477	1666.89	1666.89	0.48	0.0002	CID (Collision Induced Dissociation)	MS2	21.3502	32.135	46.4748	10172	CCAB-2a3-2.raw	F587	3.47	1
FALSE	High	Sequest HT (A2)	Unambiguous	IEVIAHNELSGR		1	ACRE_091090	ACRE_091090	0	2	0.585	0	1	1	669.363	1337.72	1337.72	0.62	0.00042	CID (Collision Induced Dissociation)	MS2	23.4951	5.403	33.8714	5797	CCAB-2a3-2.raw	F587	3.47	1
FALSE	High	Sequest HT (A2)	Unambiguous	SGGKIEVIAHNELSGR		1	ACRE_091090	ACRE_091090	1	2	0.5751	0	1	1	833.95	1666.89	1666.89	3.76	0.00314	CID (Collision Induced Dissociation)	MS2	64.4249	150	49.9348	10985	CCAB-3a3-2.raw	F595	3.46	1
FALSE	High	Sequest HT (A2)	Unambiguous	SGGKIEVIAHNELSGR		1	ACRE_091090	ACRE_091090	1	3	0.6329	0	1	1	556.301	1666.89	1666.89	0.06	3e-05	CID (Collision Induced Dissociation)	MS2	27.6844	150	61.0182	11140	CCAB-3a3.raw	F594	3.46	1
FALSE	High	Sequest HT (A2)	Unambiguous	SGGKIEVIAHNELSGR		1	ACRE_091090	ACRE_091090	1	3	0.6676	0	1	1	556.3	1666.88	1666.89	-1.62	-0.0009	CID (Collision Induced Dissociation)	MS2	40.5858	150	57.8383	10684	CCAB-4a2.raw	F598	3.46	1
FALSE	High	Sequest HT (A2)	Unambiguous	TNNLGDAVVIQQK		1	ACRE_091090	ACRE_091090	0	2	0.5607	0	1	1	700.38	1399.75	1399.75	-1.4	-0.00098	CID (Collision Induced Dissociation)	MS2	66.5786	150	60.696	13352	CCAB-3a3-2.raw	F595	3.46	1
FALSE	High	Sequest HT (A2)	Unambiguous	FIINASQPANDKIFDVSAFEK		1	ACRE_091090	ACRE_091090	1	3	0.4029	0	1	1	785.408	2354.21	2354.2	3.41	0.00267	CID (Collision Induced Dissociation)	MS2	48.3025	150	42.4756	8431	WT-a.raw	F635	3.45	1
FALSE	High	Sequest HT (A2)	Unambiguous	SGGKIEVIAHNELSGR		1	ACRE_091090	ACRE_091090	1	3	0.4928	0	1	1	556.3	1666.88	1666.89	-1.44	-0.0008	CID (Collision Induced Dissociation)	MS2	51.8345	150	45.1257	8160	CCAB-4a3-2.raw	F601	3.45	1
FALSE	High	Sequest HT (A2)	Unambiguous	FYNVVNDEADEDED		1	ACRE_091090	ACRE_091090	0	2	0.8145	0	1	1	837.328	1673.65	1673.64	2.29	0.00192	CID (Collision Induced Dissociation)	MS2	0.219981	1.097	37.5112	5823	CCAB-3a3.raw	F594	3.45	1
FALSE	High	Sequest HT (A2)	Unambiguous	SGGKIEVIAHNELSGR		1	ACRE_091090	ACRE_091090	1	3	0.5203	0	1	1	556.3	1666.89	1666.89	-0.39	-0.00022	CID (Collision Induced Dissociation)	MS2	35.43	150	59.6044	14014	CCAB-4a2-2.raw	F599	3.44	1
FALSE	High	Sequest HT (A2)	Unambiguous	SGGKIEVIAHNELSGR		1	ACRE_091090	ACRE_091090	1	3	0.564	0	1	1	556.301	1666.89	1666.89	0.8	0.00044	CID (Collision Induced Dissociation)	MS2	32.2723	150	58.1347	8863	CCAB-4a3.raw	F600	3.44	1
FALSE	High	Sequest HT (A2)	Unambiguous	SGGKIEVIAHNELSGR		1	ACRE_091090	ACRE_091090	1	3	0.561	0	1	1	556.301	1666.89	1666.89	0.89	0.0005	CID (Collision Induced Dissociation)	MS2	72.9603	150	49.2233	7396	CCAB-4a3.raw	F600	3.44	1
FALSE	High	Sequest HT (A2)	Unambiguous	TNNLGDAVVIQQK		1	ACRE_091090	ACRE_091090	0	2	0.5058	0	1	1	700.38	1399.75	1399.75	-1.15	-0.00081	CID (Collision Induced Dissociation)	MS2	52.1546	150	60.9336	14305	CCAB-4a2-2.raw	F599	3.44	1
FALSE	High	Sequest HT (A2)	Unambiguous	TNNLGDAVVIQQK		1	ACRE_091090	ACRE_091090	0	2	0.4622	0	1	1	700.382	1399.76	1399.75	1.72	0.00121	CID (Collision Induced Dissociation)	MS2	24.4755	60.509	34.3312	5839	CCAB-3a3-2.raw	F595	3.44	1
FALSE	High	Sequest HT (A2)	Unambiguous	FIINASQPANDK		1	ACRE_091090	ACRE_091090	0	2	0.4985	0	1	1	659.345	1317.68	1317.68	2.65	0.00174	CID (Collision Induced Dissociation)	MS2	70.2211	150	35.4407	4226	CCAB-4a3.raw	F600	3.43	1
FALSE	High	Sequest HT (A2)	Unambiguous	SGGKIEVIAHNELSGR		1	ACRE_091090	ACRE_091090	1	4	0.6181	0	1	1	417.478	1666.89	1666.89	1.04	0.00043	CID (Collision Induced Dissociation)	MS2	71.072	86.153	56.2222	13255	CCAB-4a2-2.raw	F599	3.43	1
FALSE	High	Sequest HT (A2)	Unambiguous	SGGKIEVIAHNELSGR		1	ACRE_091090	ACRE_091090	1	3	0.4723	0	1	1	556.3	1666.89	1666.89	-0.49	-0.00027	CID (Collision Induced Dissociation)	MS2	32.5106	24.122	49.5563	11601	CCAB-4a2-2.raw	F599	3.43	1
FALSE	High	Sequest HT (A2)	Unambiguous	SGGKIEVIAHNELSGR		1	ACRE_091090	ACRE_091090	1	4	0.5598	0	1	1	417.478	1666.89	1666.89	1.24	0.00052	CID (Collision Induced Dissociation)	MS2	39.7265	150	58.7422	13825	CCAB-4a2-2.raw	F599	3.43	1
FALSE	High	Sequest HT (A2)	Unambiguous	SGGKIEVIAHNELSGR		1	ACRE_091090	ACRE_091090	1	4	0.5335	0	1	1	417.478	1666.89	1666.89	1.87	0.00078	CID (Collision Induced Dissociation)	MS2	41.2764	150	43.6121	7432	CCAB-3a3.raw	F594	3.43	1
FALSE	High	Sequest HT (A2)	Unambiguous	SGGKIEVIAHNELSGR		1	ACRE_091090	ACRE_091090	1	2	0.5743	0	1	1	833.947	1666.89	1666.89	0.09	8e-05	CID (Collision Induced Dissociation)	MS2	49.611	150	58.2541	13009	CCAB-2a3-2.raw	F587	3.43	1
FALSE	High	Sequest HT (A2)	Unambiguous	SGGKIEVIAHNELSGR		1	ACRE_091090	ACRE_091090	1	3	0.3848	0	1	1	556.3	1666.89	1666.89	-1.13	-0.00063	CID (Collision Induced Dissociation)	MS2	44.7345	150	51.1569	9420	CCAB-4a2.raw	F598	3.43	1
FALSE	High	Sequest HT (A2)	Unambiguous	SGGKIEVIAHNELSGR		1	ACRE_091090	ACRE_091090	1	3	0.4752	0	1	1	556.301	1666.89	1666.89	-0.06	-3e-05	CID (Collision Induced Dissociation)	MS2	44.968	86.553	49.5866	9798	CCAB-4a1-2.raw	F597	3.43	1
FALSE	High	Sequest HT (A2)	Unambiguous	SGGKIEVIAHNELSGR		1	ACRE_091090	ACRE_091090	1	4	0.4561	0	1	1	417.477	1666.89	1666.89	0.13	6e-05	CID (Collision Induced Dissociation)	MS2	53.1791	37.638	44.144	9461	CCAB-2a3-2.raw	F587	3.42	1
FALSE	High	Sequest HT (A2)	Unambiguous	FIINASQPANDK		1	ACRE_091090	ACRE_091090	0	2	0.576	0	1	1	659.343	1317.68	1317.68	-0.03	-2e-05	CID (Collision Induced Dissociation)	MS2	12.9783	13.224	35.2452	6035	CCAB-3a2-2.raw	F593	3.42	1
FALSE	High	Sequest HT (A2)	Unambiguous	TNNLGDAVVIQQK		1	ACRE_091090	ACRE_091090	0	2	0.4211	0	1	1	700.382	1399.76	1399.75	1.74	0.00122	CID (Collision Induced Dissociation)	MS2	79.9994	65.655	36.8807	6581	CCAB-3a2-2.raw	F593	3.42	1
FALSE	High	Sequest HT (A2)	Unambiguous	FIINASQPANDK		1	ACRE_091090	ACRE_091090	0	2	0.4897	0	1	1	659.345	1317.68	1317.68	2.71	0.00179	CID (Collision Induced Dissociation)	MS2	0.882424	2.152	35.386	5215	CCAB-3a3.raw	F594	3.41	1
FALSE	High	Sequest HT (A2)	Unambiguous	SGGKIEVIAHNELSGR		1	ACRE_091090	ACRE_091090	1	4	0.5543	0	1	1	417.478	1666.89	1666.89	1.86	0.00077	CID (Collision Induced Dissociation)	MS2	45.6341	150	59.5409	14000	CCAB-4a2-2.raw	F599	3.41	1
FALSE	High	Sequest HT (A2)	Unambiguous	FYNVVNDEADEDED		1	ACRE_091090	ACRE_091090	0	2	0.7918	0	1	1	837.326	1673.65	1673.64	0.31	0.00026	CID (Collision Induced Dissociation)	MS2	30.2622	150	36.8652	4569	CCAB-4a3.raw	F600	3.41	1
FALSE	High	Sequest HT (A2)	Unambiguous	TNNLGDAVVIQQK		1	ACRE_091090	ACRE_091090	0	2	0.4353	0	1	1	700.38	1399.75	1399.75	-0.98	-0.00068	CID (Collision Induced Dissociation)	MS2	53.4736	150	37.1168	4629	CCAB-4a3.raw	F600	3.4	1
FALSE	High	Sequest HT (A2)	Unambiguous	SGGKIEVIAHNELSGR		1	ACRE_091090	ACRE_091090	1	4	0.4706	0	1	1	417.478	1666.89	1666.89	0.7	0.00029	CID (Collision Induced Dissociation)	MS2	20.1092	40.843	48.6574	10574	CCAB-3a3-2.raw	F595	3.4	1
FALSE	High	Sequest HT (A2)	Unambiguous	SGGKIEVIAHNELSGR		1	ACRE_091090	ACRE_091090	1	3	0.5841	0	1	1	556.3	1666.89	1666.89	-1.14	-0.00063	CID (Collision Induced Dissociation)	MS2	47.9166	150	60.0803	13408	CCAB-2a3-2.raw	F587	3.39	1
FALSE	High	Sequest HT (A2)	Unambiguous	SGGKIEVIAHNELSGR		1	ACRE_091090	ACRE_091090	1	3	0.6165	0	1	1	556.3	1666.89	1666.89	-0.44	-0.00024	CID (Collision Induced Dissociation)	MS2	42.003	150	60.7545	11098	CCAB-3a3.raw	F594	3.39	1
FALSE	High	Sequest HT (A2)	Unambiguous	TNNLGDAVVIQQK		1	ACRE_091090	ACRE_091090	0	2	0.4572	0	1	1	700.38	1399.75	1399.75	-0.41	-0.00029	CID (Collision Induced Dissociation)	MS2	76.7348	150	60.5592	13510	CCAB-2a3-2.raw	F587	3.39	1
FALSE	High	Sequest HT (A2)	Unambiguous	SGGKIEVIAHNELSGR		1	ACRE_091090	ACRE_091090	1	3	0.5664	0	1	1	556.3	1666.89	1666.89	-0.26	-0.00014	CID (Collision Induced Dissociation)	MS2	18.0295	150	63.3537	13881	CCAB-3a3-2.raw	F595	3.39	1
FALSE	High	Sequest HT (A2)	Unambiguous	SGGKIEVIAHNELSGR		1	ACRE_091090	ACRE_091090	1	4	0.5723	0	1	1	417.477	1666.89	1666.89	0.47	0.0002	CID (Collision Induced Dissociation)	MS2	31.0945	52.152	48.9228	11366	CCAB-4a2-2.raw	F599	3.39	1
FALSE	High	Sequest HT (A2)	Unambiguous	SGGKIEVIAHNELSGR		1	ACRE_091090	ACRE_091090	1	3	0.6302	0	1	1	556.301	1666.89	1666.89	0.9	0.0005	CID (Collision Induced Dissociation)	MS2	45.6661	22.278	50.3495	11337	CCAB-2a3-2.raw	F587	3.38	1
FALSE	High	Sequest HT (A2)	Unambiguous	SGGKIEVIAHNELSGR		1	ACRE_091090	ACRE_091090	1	4	0.5562	0	1	1	417.478	1666.89	1666.89	0.79	0.00033	CID (Collision Induced Dissociation)	MS2	47.7442	150	57.8997	13637	CCAB-4a2-2.raw	F599	3.38	1
FALSE	High	Sequest HT (A2)	Unambiguous	SGGKIEVIAHNELSGR		1	ACRE_091090	ACRE_091090	1	2	0.6617	0	1	1	833.948	1666.89	1666.89	0.71	0.00059	CID (Collision Induced Dissociation)	MS2	42.5066	150	57.0739	10408	CCAB-3a3.raw	F594	3.37	1
FALSE	High	Sequest HT (A2)	Unambiguous	TNNLGDAVVIQQK		1	ACRE_091090	ACRE_091090	0	2	0.543	0	1	1	700.381	1399.76	1399.75	0.85	0.0006	CID (Collision Induced Dissociation)	MS2	51.6027	150	62.1917	14562	CCAB-4a2-2.raw	F599	3.37	1
FALSE	High	Sequest HT (A2)	Unambiguous	SGGKIEVIAHNELSGR		1	ACRE_091090	ACRE_091090	1	3	0.4732	0	1	1	556.3	1666.89	1666.89	-0.3	-0.00016	CID (Collision Induced Dissociation)	MS2	62.0306	150	61.3644	11218	CCAB-4a3-2.raw	F601	3.36	1
FALSE	High	Sequest HT (A2)	Unambiguous	SGGKIEVIAHNELSGR		1	ACRE_091090	ACRE_091090	1	4	0.5893	0	1	1	417.478	1666.89	1666.89	1.69	0.0007	CID (Collision Induced Dissociation)	MS2	32.2577	62.812	44.1159	9289	CCAB-3a3-2.raw	F595	3.36	1
FALSE	High	Sequest HT (A2)	Unambiguous	TNNLGDAVVIQQK		1	ACRE_091090	ACRE_091090	0	2	0.4746	0	1	1	700.381	1399.76	1399.75	1.08	0.00075	CID (Collision Induced Dissociation)	MS2	28.0817	150	60.8042	13375	CCAB-3a3-2.raw	F595	3.35	1
FALSE	High	Sequest HT (A2)	Unambiguous	SGGKIEVIAHNELSGR		1	ACRE_091090	ACRE_091090	1	2	0.6976	0	1	1	833.948	1666.89	1666.89	1.11	0.00093	CID (Collision Induced Dissociation)	MS2	66.8893	150	56.0377	10187	CCAB-3a3.raw	F594	3.34	1
FALSE	High	Sequest HT (A2)	Unambiguous	SGGKIEVIAHNELSGR		1	ACRE_091090	ACRE_091090	1	3	0.4354	0	1	1	556.302	1666.89	1666.89	2.87	0.0016	CID (Collision Induced Dissociation)	MS2	23.3247	150	48.6799	7276	CCAB-4a3.raw	F600	3.33	1
FALSE	High	Sequest HT (A2)	Unambiguous	TNNLGDAVVIQQK		1	ACRE_091090	ACRE_091090	0	2	0.4505	0	1	1	700.381	1399.75	1399.75	0.12	8e-05	CID (Collision Induced Dissociation)	MS2	31.0937	150	52.7701	9554	CCAB-3a3.raw	F594	3.33	1
FALSE	High	Sequest HT (A2)	Unambiguous	FIINASQPANDKIFDVSAFEK		1	ACRE_091090	ACRE_091090	1	3	0.3874	0	1	1	785.41	2354.21	2354.2	5.17	0.00406	CID (Collision Induced Dissociation)	MS2	51.0276	78.978	49.6428	10877	CCAB-3a3-2.raw	F595	3.33	1
FALSE	High	Sequest HT (A2)	Unambiguous	KFIINASQPANDK		1	ACRE_091090	ACRE_091090	1	2	0.4805	0	1	1	723.391	1445.77	1445.77	-0.39	-0.00029	CID (Collision Induced Dissociation)	MS2	58.13	60.327	34.9893	6077	CCAB-3a3-2.raw	F595	3.33	1
FALSE	High	Sequest HT (A2)	Unambiguous	SGGKIEVIAHNELSGR		1	ACRE_091090	ACRE_091090	1	3	0.5285	0	1	1	556.3	1666.89	1666.89	-0.4	-0.00022	CID (Collision Induced Dissociation)	MS2	59.9996	28.2	43.7372	9747	CCAB-4a2-2.raw	F599	3.33	1
FALSE	High	Sequest HT (A2)	Unambiguous	TNNLGDAVVIQQK		1	ACRE_091090	ACRE_091090	0	3	0.5646	0	1	1	467.257	1399.76	1399.75	1.03	0.00048	CID (Collision Induced Dissociation)	MS2	6.65692	0.757	34.5999	6058	CCAB-2a3-2.raw	F587	3.33	1
FALSE	High	Sequest HT (A2)	Unambiguous	SGGKIEVIAHNELSGR		1	ACRE_091090	ACRE_091090	1	3	0.5151	0	1	1	556.3	1666.89	1666.89	-0.8	-0.00044	CID (Collision Induced Dissociation)	MS2	48.8862	33.619	42.9492	9475	CCAB-4a2-2.raw	F599	3.32	1
FALSE	High	Sequest HT (A2)	Unambiguous	TNNLGDAVVIQQK		1	ACRE_091090	ACRE_091090	0	3	0.5361	0	1	1	467.257	1399.76	1399.75	2.07	0.00097	CID (Collision Induced Dissociation)	MS2	11.8697	5.088	34.8652	5070	CCAB-3a3.raw	F594	3.32	1
FALSE	High	Sequest HT (A2)	Unambiguous	SGGKIEVIAHNELSGR		1	ACRE_091090	ACRE_091090	1	3	0.4337	0	1	1	556.3	1666.88	1666.89	-1.46	-0.00081	CID (Collision Induced Dissociation)	MS2	40.411	150	57.6938	9776	CCAB-4a1.raw	F596	3.32	1
FALSE	High	Sequest HT (A2)	Unambiguous	TNNLGDAVVIQQK		1	ACRE_091090	ACRE_091090	0	2	0.509	0	1	1	700.38	1399.75	1399.75	-1.49	-0.00105	CID (Collision Induced Dissociation)	MS2	65.2718	146.895	37.3058	6053	CCAB-4a3-2.raw	F601	3.32	1
FALSE	High	Sequest HT (A2)	Unambiguous	SGGKIEVIAHNELSGR		1	ACRE_091090	ACRE_091090	1	4	0.5813	0	1	1	417.477	1666.89	1666.89	0.03	1e-05	CID (Collision Induced Dissociation)	MS2	83.995	56.933	45.6292	10381	CCAB-4a2-2.raw	F599	3.32	1
FALSE	High	Sequest HT (A2)	Unambiguous	TNNLGDAVVIQQK		1	ACRE_091090	ACRE_091090	0	2	0.5166	0	1	1	700.385	1399.76	1399.75	6.71	0.0047	CID (Collision Induced Dissociation)	MS2	67.0537	150	62.9876	14724	CCAB-4a2-2.raw	F599	3.31	1
FALSE	High	Sequest HT (A2)	Unambiguous	SGGKIEVIAHNELSGR		1	ACRE_091090	ACRE_091090	1	3	0.5136	0	1	1	556.304	1666.9	1666.89	5.36	0.00298	CID (Collision Induced Dissociation)	MS2	60.0191	150	58.2223	9863	CCAB-4a1.raw	F596	3.31	1
FALSE	High	Sequest HT (A2)	Unambiguous	SGGKIEVIAHNELSGR		1	ACRE_091090	ACRE_091090	1	4	0.5227	0	1	1	417.478	1666.89	1666.89	1.84	0.00077	CID (Collision Induced Dissociation)	MS2	62.3405	75.57	43.1642	8984	CCAB-3a3-2.raw	F595	3.31	1
FALSE	High	Sequest HT (A2)	Unambiguous	SGGKIEVIAHNELSGR		1	ACRE_091090	ACRE_091090	1	3	0.5559	0	1	1	556.301	1666.89	1666.89	0.55	0.00031	CID (Collision Induced Dissociation)	MS2	66.6017	150	61.1324	12312	CCAB-4a1-2.raw	F597	3.31	1
FALSE	High	Sequest HT (A2)	Unambiguous	FYNVVNDEADEDED		1	ACRE_091090	ACRE_091090	0	2	0.8157	0	1	1	837.329	1673.65	1673.64	3.21	0.00269	CID (Collision Induced Dissociation)	MS2	38.9718	150	38.1863	6314	CCAB-4a3-2.raw	F601	3.31	1
FALSE	High	Sequest HT (A2)	Unambiguous	SGGKIEVIAHNELSGR		1	ACRE_091090	ACRE_091090	1	3	0.4879	0	1	1	556.3	1666.89	1666.89	-0.12	-7e-05	CID (Collision Induced Dissociation)	MS2	29.5797	150	64.0603	14014	CCAB-3a3-2.raw	F595	3.3	1
FALSE	High	Sequest HT (A2)	Unambiguous	IEVIAHNELSGR		1	ACRE_091090	ACRE_091090	0	2	0.5879	0	1	1	669.363	1337.72	1337.72	0.87	0.00058	CID (Collision Induced Dissociation)	MS2	35.4279	55.821	34.3267	4922	CCAB-3a3.raw	F594	3.3	1
FALSE	High	Sequest HT (A2)	Unambiguous	SGGKIEVIAHNELSGR		1	ACRE_091090	ACRE_091090	1	3	0.5606	0	1	1	556.302	1666.89	1666.89	2.31	0.00128	CID (Collision Induced Dissociation)	MS2	84.2517	150	56.4314	15334	CCAB-2b-2.raw	F589	3.3	1
FALSE	High	Sequest HT (A2)	Unambiguous	SGGKIEVIAHNELSGR		1	ACRE_091090	ACRE_091090	1	4	0.4242	0	1	1	417.477	1666.89	1666.89	-0.22	-9e-05	CID (Collision Induced Dissociation)	MS2	50.9592	81.136	47.3713	10905	CCAB-4a2-2.raw	F599	3.3	1
FALSE	High	Sequest HT (A2)	Unambiguous	SGGKIEVIAHNELSGR		1	ACRE_091090	ACRE_091090	1	3	0.5424	0	1	1	556.306	1666.9	1666.89	10.41	0.00579	CID (Collision Induced Dissociation)	MS2	89.6136	150	57.2206	9698	CCAB-4a1.raw	F596	3.3	1
FALSE	High	Sequest HT (A2)	Unambiguous	SGGKIEVIAHNELSGR		1	ACRE_091090	ACRE_091090	1	3	0.6394	0	1	1	556.301	1666.89	1666.89	-0.08	-4e-05	CID (Collision Induced Dissociation)	MS2	29.716	85.973	48.7324	8659	CCAB-3a3.raw	F594	3.3	1
FALSE	High	Sequest HT (A2)	Unambiguous	FYNVVNDEADEDED		1	ACRE_091090	ACRE_091090	0	2	0.7234	0	1	1	837.325	1673.64	1673.64	-0.99	-0.00083	CID (Collision Induced Dissociation)	MS2	29.9802	150	39.0721	7306	CCAB-3a2-2.raw	F593	3.29	1
FALSE	High	Sequest HT (A2)	Unambiguous	FYNVVNDEADEDED		1	ACRE_091090	ACRE_091090	0	2	0.7568	0	1	1	837.324	1673.64	1673.64	-2.31	-0.00193	CID (Collision Induced Dissociation)	MS2	66.4706	150	38.2933	6041	CCAB-3a3.raw	F594	3.29	1
FALSE	High	Sequest HT (A2)	Unambiguous	TNNLGDAVVIQQK		1	ACRE_091090	ACRE_091090	0	2	0.4772	0	1	1	700.38	1399.75	1399.75	-0.53	-0.00037	CID (Collision Induced Dissociation)	MS2	27.5338	150	62.1081	13638	CCAB-3a3-2.raw	F595	3.29	1
FALSE	High	Sequest HT (A2)	Unambiguous	SGGKIEVIAHNELSGR		1	ACRE_091090	ACRE_091090	1	3	0.4817	0	1	1	556.3	1666.89	1666.89	-0.59	-0.00033	CID (Collision Induced Dissociation)	MS2	78.7432	150	55.7238	9434	CCAB-4a1.raw	F596	3.28	1
FALSE	High	Sequest HT (A2)	Unambiguous	FIINASQPANDKIFDVSAFEK		1	ACRE_091090	ACRE_091090	1	3	0.5627	0	1	1	785.406	2354.2	2354.2	0.25	0.00019	CID (Collision Induced Dissociation)	MS2	9.73164	78.414	43.4373	6916	CCAB-1a.raw	F578	3.27	1
FALSE	High	Sequest HT (A2)	Unambiguous	KFIINASQPANDK		1	ACRE_091090	ACRE_091090	1	2	0.3364	0	1	1	723.391	1445.77	1445.77	-0.04	-3e-05	CID (Collision Induced Dissociation)	MS2	69.2256	150	35.7352	5579	CCAB-4a3-2.raw	F601	3.27	1
FALSE	High	Sequest HT (A2)	Unambiguous	IEVIAHNELSGR		1	ACRE_091090	ACRE_091090	0	2	0.4434	0	1	1	669.362	1337.72	1337.72	0.04	3e-05	CID (Collision Induced Dissociation)	MS2	66.3033	98.413	34.3022	5135	CCAB-4a3-2.raw	F601	3.27	1
FALSE	High	Sequest HT (A2)	Unambiguous	FIINASQPANDKIFDVSAFEK		1	ACRE_091090	ACRE_091090	1	3	0.367	0	1	1	785.405	2354.2	2354.2	-1.08	-0.00084	CID (Collision Induced Dissociation)	MS2	38.5545	150	51.5717	9509	CCAB-4a2.raw	F598	3.27	1
FALSE	High	Sequest HT (A2)	Unambiguous	FIINASQPANDKIFDVSAFEK		1	ACRE_091090	ACRE_091090	1	3	0.5015	0	1	1	785.405	2354.2	2354.2	-1.29	-0.00101	CID (Collision Induced Dissociation)	MS2	15.0467	86.088	48.045	8627	CCAB-4a2.raw	F598	3.27	1
FALSE	High	Sequest HT (A2)	Unambiguous	SGGKIEVIAHNELSGR		1	ACRE_091090	ACRE_091090	1	3	0.4159	0	1	1	556.3	1666.88	1666.89	-1.54	-0.00085	CID (Collision Induced Dissociation)	MS2	50.9566	150	45.4566	6585	CCAB-4a3.raw	F600	3.27	1
FALSE	High	Sequest HT (A2)	Unambiguous	SGGKIEVIAHNELSGR		1	ACRE_091090	ACRE_091090	1	3	0.4557	0	1	1	556.301	1666.89	1666.89	0.23	0.00013	CID (Collision Induced Dissociation)	MS2	40.8284	139.641	43.1088	7302	CCAB-3a3.raw	F594	3.27	1
FALSE	High	Sequest HT (A2)	Unambiguous	IEVIAHNELSGR		1	ACRE_091090	ACRE_091090	0	2	0.6239	0	1	1	669.363	1337.72	1337.72	0.41	0.00027	CID (Collision Induced Dissociation)	MS2	19.2848	4.931	33.9631	6044	CCAB-4a2-2.raw	F599	3.27	1
FALSE	High	Sequest HT (A2)	Unambiguous	SGGKIEVIAHNELSGR		1	ACRE_091090	ACRE_091090	1	3	0.5382	0	1	1	556.304	1666.9	1666.89	6.9	0.00384	CID (Collision Induced Dissociation)	MS2	88.6274	150	60.062	12101	CCAB-4a1-2.raw	F597	3.27	1
FALSE	High	Sequest HT (A2)	Unambiguous	SGGKIEVIAHNELSGR		1	ACRE_091090	ACRE_091090	1	4	0.5521	0	1	1	417.478	1666.89	1666.89	1.05	0.00044	CID (Collision Induced Dissociation)	MS2	37.745	150	60.0845	13409	CCAB-2a3-2.raw	F587	3.26	1
FALSE	High	Sequest HT (A2)	Unambiguous	KFIINASQPANDK		1	ACRE_091090	ACRE_091090	1	3	0.4172	0	1	1	482.597	1445.78	1445.77	0.69	0.00033	CID (Collision Induced Dissociation)	MS2	4.48242	2.14	34.0202	5720	CCAB-3a3-2.raw	F595	3.26	1
FALSE	High	Sequest HT (A2)	Unambiguous	TNNLGDAVVIQQK		1	ACRE_091090	ACRE_091090	0	2	0.4601	0	1	1	700.38	1399.75	1399.75	-0.83	-0.00058	CID (Collision Induced Dissociation)	MS2	50.4713	150	60.9328	12561	CCAB-3a2-2.raw	F593	3.26	1
FALSE	High	Sequest HT (A2)	Unambiguous	FIINASQPANDKIFDVSAFEK		1	ACRE_091090	ACRE_091090	1	3	0.4847	0	1	1	785.406	2354.2	2354.2	0.14	0.00011	CID (Collision Induced Dissociation)	MS2	12.6382	33.063	43.3318	8634	WT-a.raw	F635	3.26	1
FALSE	High	Sequest HT (A2)	Unambiguous	TNNLGDAVVIQQK		1	ACRE_091090	ACRE_091090	0	2	0.4049	0	1	1	700.38	1399.75	1399.75	-0.68	-0.00048	CID (Collision Induced Dissociation)	MS2	40.4469	150	52.8969	11671	CCAB-3a3-2.raw	F595	3.26	1
FALSE	High	Sequest HT (A2)	Unambiguous	SGGKIEVIAHNELSGR		1	ACRE_091090	ACRE_091090	1	3	0.6227	0	1	1	556.301	1666.89	1666.89	0.9	0.0005	CID (Collision Induced Dissociation)	MS2	33.3411	130.733	50.2059	9315	CCAB-4a3-2.raw	F601	3.26	1
FALSE	High	Sequest HT (A2)	Unambiguous	TNNLGDAVVIQQK		1	ACRE_091090	ACRE_091090	0	2	0.6534	0	1	1	700.368	1399.73	1399.75	-17.46	-0.01222	CID (Collision Induced Dissociation)	MS2	89.4193	150	60.1358	14133	CCAB-4a2-2.raw	F599	3.26	1
FALSE	High	Sequest HT (A2)	Unambiguous	KFIINASQPANDK		1	ACRE_091090	ACRE_091090	1	2	0.4509	0	1	1	723.39	1445.77	1445.77	-1.39	-0.001	CID (Collision Induced Dissociation)	MS2	36.2288	150	33.0437	3639	CCAB-4a3.raw	F600	3.26	1
FALSE	High	Sequest HT (A2)	Unambiguous	KFIINASQPANDK		1	ACRE_091090	ACRE_091090	1	2	0.2515	0	1	1	723.378	1445.75	1445.77	-17.82	-0.01288	CID (Collision Induced Dissociation)	MS2	50.1315	42.851	33.8805	5559	CCAB-3a2-2.raw	F593	3.26	1
FALSE	High	Sequest HT (A2)	Unambiguous	TNNLGDAVVIQQK		1	ACRE_091090	ACRE_091090	0	2	0.454	0	1	1	700.379	1399.75	1399.75	-2.51	-0.00176	CID (Collision Induced Dissociation)	MS2	50.4642	51.767	33.9947	5842	CCAB-2a3-2.raw	F587	3.26	1
FALSE	High	Sequest HT (A2)	Unambiguous	FIINASQPANDK		1	ACRE_091090	ACRE_091090	0	2	0.4523	0	1	1	659.342	1317.68	1317.68	-2.29	-0.00151	CID (Collision Induced Dissociation)	MS2	46.0732	71.347	36.2125	5722	CCAB-4a3-2.raw	F601	3.25	1
FALSE	High	Sequest HT (A2)	Unambiguous	TNNLGDAVVIQQK		1	ACRE_091090	ACRE_091090	0	2	0.4523	0	1	1	700.38	1399.75	1399.75	-0.43	-0.0003	CID (Collision Induced Dissociation)	MS2	49.2405	150	59.9808	13387	CCAB-2a3-2.raw	F587	3.25	1
FALSE	High	Sequest HT (A2)	Unambiguous	TNNLGDAVVIQQK		1	ACRE_091090	ACRE_091090	0	2	0.4228	0	1	1	700.38	1399.75	1399.75	-0.99	-0.00069	CID (Collision Induced Dissociation)	MS2	87.5956	150	59.3944	13968	CCAB-4a2-2.raw	F599	3.24	1
FALSE	High	Sequest HT (A2)	Unambiguous	SGGKIEVIAHNELSGR		1	ACRE_091090	ACRE_091090	1	3	0.537	0	1	1	556.302	1666.89	1666.89	2.93	0.00163	CID (Collision Induced Dissociation)	MS2	62.4495	150	46.2801	6765	CCAB-4a3.raw	F600	3.24	1
FALSE	High	Sequest HT (A2)	Unambiguous	SGGKIEVIAHNELSGR		1	ACRE_091090	ACRE_091090	1	3	0.6358	0	1	1	556.302	1666.89	1666.89	2.03	0.00113	CID (Collision Induced Dissociation)	MS2	27.2025	150	57.9083	10618	CCAB-4a3-2.raw	F601	3.24	1
FALSE	High	Sequest HT (A2)	Unambiguous	TNNLGDAVVIQQK		1	ACRE_091090	ACRE_091090	0	2	0.429	0	1	1	700.38	1399.75	1399.75	-0.24	-0.00017	CID (Collision Induced Dissociation)	MS2	39.9488	150	53.3965	12625	CCAB-4a2-2.raw	F599	3.24	1
FALSE	High	Sequest HT (A2)	Unambiguous	SGGKIEVIAHNELSGR		1	ACRE_091090	ACRE_091090	1	3	0.5648	0	1	1	556.301	1666.89	1666.89	0.46	0.00025	CID (Collision Induced Dissociation)	MS2	50.8007	148.978	45.9502	8344	CCAB-4a3-2.raw	F601	3.24	1
FALSE	High	Sequest HT (A2)	Unambiguous	TNNLGDAVVIQQK		1	ACRE_091090	ACRE_091090	0	2	0.4334	0	1	1	700.379	1399.75	1399.75	-2.86	-0.002	CID (Collision Induced Dissociation)	MS2	49.8145	150	64.2613	14046	CCAB-3a3-2.raw	F595	3.23	1
FALSE	High	Sequest HT (A2)	Unambiguous	FIINASQPANDKIFDVSAFEK		1	ACRE_091090	ACRE_091090	1	3	0.5944	0	1	1	785.407	2354.21	2354.2	2.21	0.00173	CID (Collision Induced Dissociation)	MS2	0	150	54.9997	12975	CCAB-4a2-2.raw	F599	3.23	1
FALSE	High	Sequest HT (A2)	Unambiguous	SGGKIEVIAHNELSGR		1	ACRE_091090	ACRE_091090	1	3	0.613	0	1	1	556.301	1666.89	1666.89	0.81	0.00045	CID (Collision Induced Dissociation)	MS2	36.7743	150	57.611	8787	CCAB-4a3.raw	F600	3.23	1
FALSE	High	Sequest HT (A2)	Unambiguous	SGGKIEVIAHNELSGR		1	ACRE_091090	ACRE_091090	1	2	0.6749	0	1	1	833.949	1666.89	1666.89	2.4	0.002	CID (Collision Induced Dissociation)	MS2	61.8871	150	58.8044	10763	CCAB-3a3.raw	F594	3.23	1
FALSE	High	Sequest HT (A2)	Unambiguous	SGGKIEVIAHNELSGR		1	ACRE_091090	ACRE_091090	1	3	0.4799	0	1	1	556.301	1666.89	1666.89	0.43	0.00024	CID (Collision Induced Dissociation)	MS2	81.2549	150	49.4108	8568	CCAB-3a2.raw	F592	3.23	1
FALSE	High	Sequest HT (A2)	Unambiguous	SGGKIEVIAHNELSGR		1	ACRE_091090	ACRE_091090	1	3	0.5882	0	1	1	556.3	1666.89	1666.89	-0.21	-0.00012	CID (Collision Induced Dissociation)	MS2	38.7317	150	55.1142	9986	CCAB-3a3.raw	F594	3.23	1
FALSE	High	Sequest HT (A2)	Unambiguous	SGGKIEVIAHNELSGR		1	ACRE_091090	ACRE_091090	1	3	0.5994	0	1	1	556.302	1666.89	1666.89	3.34	0.00186	CID (Collision Induced Dissociation)	MS2	20.5343	150	61.5196	11209	CCAB-3a3.raw	F594	3.22	1
FALSE	High	Sequest HT (A2)	Unambiguous	FIINASQPANDK		1	ACRE_091090	ACRE_091090	0	2	0.4907	0	1	1	659.343	1317.68	1317.68	-0.03	-2e-05	CID (Collision Induced Dissociation)	MS2	63.5133	31.109	36.0784	6480	CCAB-3a3-2.raw	F595	3.22	1
FALSE	High	Sequest HT (A2)	Unambiguous	SGGKIEVIAHNELSGR		1	ACRE_091090	ACRE_091090	1	3	0.6118	0	1	1	556.301	1666.89	1666.89	0.05	3e-05	CID (Collision Induced Dissociation)	MS2	31.5858	150	58.3756	8895	CCAB-4a3.raw	F600	3.22	1
FALSE	High	Sequest HT (A2)	Unambiguous	SGGKIEVIAHNELSGR		1	ACRE_091090	ACRE_091090	1	3	0.441	0	1	1	556.3	1666.89	1666.89	-0.73	-0.00041	CID (Collision Induced Dissociation)	MS2	49.8789	28.233	44.8807	10139	CCAB-4a2-2.raw	F599	3.22	1
FALSE	High	Sequest HT (A2)	Unambiguous	IEVIAHNELSGR		1	ACRE_091090	ACRE_091090	0	2	0.4735	0	1	1	669.361	1337.71	1337.72	-2.05	-0.00137	CID (Collision Induced Dissociation)	MS2	83.998	64.971	36.7721	6856	CCAB-2a3-2.raw	F587	3.21	1
FALSE	High	Sequest HT (A2)	Unambiguous	SGGKIEVIAHNELSGR		1	ACRE_091090	ACRE_091090	1	4	0.514	0	1	1	417.478	1666.89	1666.89	1.41	0.00059	CID (Collision Induced Dissociation)	MS2	74.8847	80.358	46.5713	10671	CCAB-4a2-2.raw	F599	3.21	1
FALSE	High	Sequest HT (A2)	Unambiguous	TNNLGDAVVIQQK		1	ACRE_091090	ACRE_091090	0	2	0.6044	0	1	1	700.38	1399.75	1399.75	-0.41	-0.00029	CID (Collision Induced Dissociation)	MS2	0	150	62.1604	13833	CCAB-2a3-2.raw	F587	3.21	1
FALSE	High	Sequest HT (A2)	Unambiguous	TNNLGDAVVIQQK		1	ACRE_091090	ACRE_091090	0	2	0.4438	0	1	1	700.381	1399.75	1399.75	0.71	0.0005	CID (Collision Induced Dissociation)	MS2	50.8775	150	52.4417	12424	CCAB-4a2-2.raw	F599	3.2	1
FALSE	High	Sequest HT (A2)	Unambiguous	SGGKIEVIAHNELSGR		1	ACRE_091090	ACRE_091090	1	3	0.5125	0	1	1	556.3	1666.89	1666.89	-0.75	-0.00042	CID (Collision Induced Dissociation)	MS2	32.6045	100.105	50.1644	9305	CCAB-4a3-2.raw	F601	3.2	1
FALSE	High	Sequest HT (A2)	Unambiguous	KFIINASQPANDK		1	ACRE_091090	ACRE_091090	1	3	0.3906	0	1	1	482.597	1445.78	1445.77	1.91	0.00092	CID (Collision Induced Dissociation)	MS2	16.6641	22.299	33.2143	4609	CCAB-3a3.raw	F594	3.2	1
FALSE	High	Sequest HT (A2)	Unambiguous	IEVIAHNELSGR		1	ACRE_091090	ACRE_091090	0	2	0.5156	0	1	1	669.366	1337.73	1337.72	6.19	0.00414	CID (Collision Induced Dissociation)	MS2	78.8604	150	58.6536	13098	CCAB-2a3-2.raw	F587	3.2	1
FALSE	High	Sequest HT (A2)	Unambiguous	SGGKIEVIAHNELSGR		1	ACRE_091090	ACRE_091090	1	4	0.6144	0	1	1	417.478	1666.89	1666.89	2.13	0.00089	CID (Collision Induced Dissociation)	MS2	14.9082	45.946	56.9109	12707	CCAB-2a3-2.raw	F587	3.19	1
FALSE	High	Sequest HT (A2)	Unambiguous	SGGKIEVIAHNELSGR		1	ACRE_091090	ACRE_091090	1	3	0.5235	0	1	1	556.3	1666.89	1666.89	-0.6	-0.00033	CID (Collision Induced Dissociation)	MS2	68.5365	150	57.0877	9675	CCAB-4a1.raw	F596	3.19	1
FALSE	High	Sequest HT (A2)	Unambiguous	TNNLGDAVVIQQK		1	ACRE_091090	ACRE_091090	0	2	0.4138	0	1	1	700.378	1399.75	1399.75	-3.93	-0.00275	CID (Collision Induced Dissociation)	MS2	41.6333	150	37.7058	4771	CCAB-4a3.raw	F600	3.19	1
FALSE	High	Sequest HT (A2)	Unambiguous	TNNLGDAVVIQQK		1	ACRE_091090	ACRE_091090	0	2	0.5517	0	1	1	700.381	1399.76	1399.75	1.02	0.00072	CID (Collision Induced Dissociation)	MS2	49.4305	150	66.2605	15304	CCAB-4a2-2.raw	F599	3.19	1
FALSE	High	Sequest HT (A2)	Unambiguous	TNNLGDAVVIQQK		1	ACRE_091090	ACRE_091090	0	2	0.4119	0	1	1	700.38	1399.75	1399.75	-1.31	-0.00092	CID (Collision Induced Dissociation)	MS2	54.9084	150	36.8345	5626	CCAB-3a3.raw	F594	3.18	1
FALSE	High	Sequest HT (A2)	Unambiguous	SGGKIEVIAHNELSGR		1	ACRE_091090	ACRE_091090	1	3	0.6069	0	1	1	556.3	1666.89	1666.89	-1.06	-0.00059	CID (Collision Induced Dissociation)	MS2	53.1981	150	60.1828	11022	CCAB-4a3-2.raw	F601	3.18	1
FALSE	High	Sequest HT (A2)	Unambiguous	SGGKIEVIAHNELSGR		1	ACRE_091090	ACRE_091090	1	3	0.5189	0	1	1	556.3	1666.89	1666.89	-1.21	-0.00067	CID (Collision Induced Dissociation)	MS2	35.6188	150	65.6021	14257	CCAB-3a3-2.raw	F595	3.18	1
FALSE	High	Sequest HT (A2)	Unambiguous	IEVIAHNELSGR		1	ACRE_091090	ACRE_091090	0	2	0.6258	0	1	1	669.362	1337.72	1337.72	0.18	0.00012	CID (Collision Induced Dissociation)	MS2	15.083	9.372	35.0418	6093	CCAB-3a3-2.raw	F595	3.18	1
FALSE	High	Sequest HT (A2)	Unambiguous	TNNLGDAVVIQQK		1	ACRE_091090	ACRE_091090	0	2	0.5047	0	1	1	700.384	1399.76	1399.75	4.61	0.00323	CID (Collision Induced Dissociation)	MS2	78.9338	150	63.8371	14890	CCAB-4a2-2.raw	F599	3.17	1
FALSE	High	Sequest HT (A2)	Unambiguous	TNNLGDAVVIQQK		1	ACRE_091090	ACRE_091090	0	2	0.5457	0	1	1	700.38	1399.75	1399.75	-0.97	-0.00068	CID (Collision Induced Dissociation)	MS2	68.6984	150	61.0509	14329	CCAB-4a2-2.raw	F599	3.17	1
FALSE	High	Sequest HT (A2)	Unambiguous	SGGKIEVIAHNELSGR		1	ACRE_091090	ACRE_091090	1	3	0.3565	0	1	1	556.3	1666.89	1666.89	-0.36	-0.0002	CID (Collision Induced Dissociation)	MS2	58.1925	114.38	51.3719	11367	CCAB-3a3-2.raw	F595	3.17	1
FALSE	High	Sequest HT (A2)	Unambiguous	TNNLGDAVVIQQK		1	ACRE_091090	ACRE_091090	0	2	0.5268	0	1	1	700.38	1399.75	1399.75	-0.96	-0.00067	CID (Collision Induced Dissociation)	MS2	0	150	51.9643	9592	CCAB-4a2.raw	F598	3.17	1
FALSE	High	Sequest HT (A2)	Unambiguous	FYNVVNDEADEDED		1	ACRE_091090	ACRE_091090	0	2	0.7066	0	1	1	837.327	1673.65	1673.64	0.87	0.00073	CID (Collision Induced Dissociation)	MS2	41.4214	16.029	37.9213	7166	CCAB-3a3-2.raw	F595	3.17	1
FALSE	High	Sequest HT (A2)	Unambiguous	TNNLGDAVVIQQK		1	ACRE_091090	ACRE_091090	0	2	0.4606	0	1	1	700.38	1399.75	1399.75	-0.86	-0.0006	CID (Collision Induced Dissociation)	MS2	65.6932	150	52.3283	12399	CCAB-4a2-2.raw	F599	3.17	1
FALSE	High	Sequest HT (A2)	Unambiguous	FIINASQPANDKIFDVSAFEK		1	ACRE_091090	ACRE_091090	1	3	0.5285	0	1	1	785.404	2354.2	2354.2	-1.99	-0.00156	CID (Collision Induced Dissociation)	MS2	28.8787	76.148	48.5799	11257	CCAB-4a2-2.raw	F599	3.16	1
FALSE	High	Sequest HT (A2)	Unambiguous	SGGKIEVIAHNELSGR		1	ACRE_091090	ACRE_091090	1	4	0.5475	0	1	1	417.478	1666.89	1666.89	2.61	0.00109	CID (Collision Induced Dissociation)	MS2	27.546	55.819	50.2296	11085	CCAB-3a3-2.raw	F595	3.16	1
FALSE	High	Sequest HT (A2)	Unambiguous	FYNVVNDEADEDED		1	ACRE_091090	ACRE_091090	0	2	0.7722	0	1	1	837.324	1673.64	1673.64	-2.09	-0.00175	CID (Collision Induced Dissociation)	MS2	43.591	34.025	36.1519	6911	CCAB-4a2-2.raw	F599	3.16	1
FALSE	High	Sequest HT (A2)	Unambiguous	SGGKIEVIAHNELSGR		1	ACRE_091090	ACRE_091090	1	3	0.5854	0	1	1	556.301	1666.89	1666.89	0.1	5e-05	CID (Collision Induced Dissociation)	MS2	52.2221	150	58.1987	11983	CCAB-3a2-2.raw	F593	3.16	1
FALSE	High	Sequest HT (A2)	Unambiguous	TNNLGDAVVIQQK		1	ACRE_091090	ACRE_091090	0	2	0.5696	0	1	1	700.38	1399.75	1399.75	-0.35	-0.00025	CID (Collision Induced Dissociation)	MS2	57.7939	150	62.9458	14716	CCAB-4a2-2.raw	F599	3.16	1
FALSE	High	Sequest HT (A2)	Unambiguous	SGGKIEVIAHNELSGR		1	ACRE_091090	ACRE_091090	1	3	0.5475	0	1	1	556.3	1666.89	1666.89	-0.29	-0.00016	CID (Collision Induced Dissociation)	MS2	38.1728	13.872	43.2773	9179	CCAB-2a3-2.raw	F587	3.16	1
FALSE	High	Sequest HT (A2)	Unambiguous	FIINASQPANDK		1	ACRE_091090	ACRE_091090	0	2	0.5079	0	1	1	659.343	1317.68	1317.68	-0.4	-0.00026	CID (Collision Induced Dissociation)	MS2	67.5231	150	28.5084	4967	WT-a.raw	F635	3.15	1
FALSE	High	Sequest HT (A2)	Unambiguous	SGGKIEVIAHNELSGR		1	ACRE_091090	ACRE_091090	1	3	0.4794	0	1	1	556.301	1666.89	1666.89	0.6	0.00034	CID (Collision Induced Dissociation)	MS2	64.7892	150	41.5888	6905	CCAB-3a3.raw	F594	3.15	1
FALSE	High	Sequest HT (A2)	Unambiguous	SGGKIEVIAHNELSGR		1	ACRE_091090	ACRE_091090	1	3	0.5175	0	1	1	556.3	1666.89	1666.89	-0.49	-0.00027	CID (Collision Induced Dissociation)	MS2	45.7672	150	61.9512	14514	CCAB-4a2-2.raw	F599	3.15	1
FALSE	High	Sequest HT (A2)	Unambiguous	SGGKIEVIAHNELSGR		1	ACRE_091090	ACRE_091090	1	3	0.5365	0	1	1	556.3	1666.89	1666.89	-0.47	-0.00026	CID (Collision Induced Dissociation)	MS2	39.6474	150	44.3372	7974	CCAB-4a3-2.raw	F601	3.15	1
FALSE	High	Sequest HT (A2)	Unambiguous	TNNLGDAVVIQQK		1	ACRE_091090	ACRE_091090	0	2	0.4889	0	1	1	700.381	1399.75	1399.75	0.23	0.00016	CID (Collision Induced Dissociation)	MS2	55.5388	150	48.0347	8813	CCAB-4a3-2.raw	F601	3.15	1
FALSE	High	Sequest HT (A2)	Unambiguous	TNNLGDAVVIQQK		1	ACRE_091090	ACRE_091090	0	2	0.5255	0	1	1	700.379	1399.75	1399.75	-1.91	-0.00134	CID (Collision Induced Dissociation)	MS2	68.3161	150	60.4623	13490	CCAB-2a3-2.raw	F587	3.14	1
FALSE	High	Sequest HT (A2)	Unambiguous	SGGKIEVIAHNELSGR		1	ACRE_091090	ACRE_091090	1	3	0.5478	0	1	1	556.3	1666.89	1666.89	-1.12	-0.00062	CID (Collision Induced Dissociation)	MS2	69.189	150	54.7814	10101	CCAB-4a2.raw	F598	3.14	1
FALSE	High	Sequest HT (A2)	Unambiguous	SGGKIEVIAHNELSGR		1	ACRE_091090	ACRE_091090	1	3	0.5573	0	1	1	556.301	1666.89	1666.89	1.12	0.00062	CID (Collision Induced Dissociation)	MS2	37.307	150	63.8356	13972	CCAB-3a3-2.raw	F595	3.14	1
FALSE	High	Sequest HT (A2)	Unambiguous	SGGKIEVIAHNELSGR		1	ACRE_091090	ACRE_091090	1	3	0.6465	0	1	1	556.3	1666.89	1666.89	-0.2	-0.00011	CID (Collision Induced Dissociation)	MS2	35.4228	150	51.2026	9248	CCAB-3a3.raw	F594	3.14	1
FALSE	High	Sequest HT (A2)	Unambiguous	TNNLGDAVVIQQK		1	ACRE_091090	ACRE_091090	0	2	0.4713	0	1	1	700.381	1399.75	1399.75	0.16	0.00011	CID (Collision Induced Dissociation)	MS2	55.5508	150	45.241	8186	CCAB-4a3-2.raw	F601	3.14	1
FALSE	High	Sequest HT (A2)	Unambiguous	FYNVVNDEADEDED		1	ACRE_091090	ACRE_091090	0	2	0.7252	0	1	1	837.325	1673.64	1673.64	-1.32	-0.00111	CID (Collision Induced Dissociation)	MS2	59.7797	150	38.4707	6088	CCAB-3a3.raw	F594	3.13	1
FALSE	High	Sequest HT (A2)	Unambiguous	FIINASQPANDKIFDVSAFEK		1	ACRE_091090	ACRE_091090	1	3	0.4888	0	1	1	785.405	2354.2	2354.2	-0.35	-0.00027	CID (Collision Induced Dissociation)	MS2	55.6056	150	56.2459	13261	CCAB-4a2-2.raw	F599	3.13	1
FALSE	High	Sequest HT (A2)	Unambiguous	TNNLGDAVVIQQK		1	ACRE_091090	ACRE_091090	0	3	0.4185	0	1	1	467.256	1399.75	1399.75	0.68	0.00032	CID (Collision Induced Dissociation)	MS2	26.4893	53.625	28.0085	4835	WT-a.raw	F635	3.13	1
FALSE	High	Sequest HT (A2)	Unambiguous	SGGKIEVIAHNELSGR		1	ACRE_091090	ACRE_091090	1	3	0.4888	0	1	1	556.302	1666.89	1666.89	1.74	0.00097	CID (Collision Induced Dissociation)	MS2	63.6671	150	35.6804	6783	WT-a.raw	F635	3.13	1
FALSE	High	Sequest HT (A2)	Unambiguous	SGGKIEVIAHNELSGR		1	ACRE_091090	ACRE_091090	1	4	0.4473	0	1	1	417.478	1666.89	1666.89	1.95	0.00081	CID (Collision Induced Dissociation)	MS2	75.6841	150	55.036	9969	CCAB-3a3.raw	F594	3.13	1
FALSE	High	Sequest HT (A2)	Unambiguous	SGGKIEVIAHNELSGR		1	ACRE_091090	ACRE_091090	1	3	0.5719	0	1	1	556.301	1666.89	1666.89	0.49	0.00027	CID (Collision Induced Dissociation)	MS2	56.2677	150	37.6272	7263	WT-a.raw	F635	3.13	1
FALSE	High	Sequest HT (A2)	Unambiguous	TNNLGDAVVIQQK		1	ACRE_091090	ACRE_091090	0	2	0.4665	0	1	1	700.383	1399.76	1399.75	3.15	0.00221	CID (Collision Induced Dissociation)	MS2	27.1792	150	53.5064	12649	CCAB-4a2-2.raw	F599	3.13	1
FALSE	High	Sequest HT (A2)	Unambiguous	TNNLGDAVVIQQK		1	ACRE_091090	ACRE_091090	0	2	0.5096	0	1	1	700.38	1399.75	1399.75	-0.38	-0.00026	CID (Collision Induced Dissociation)	MS2	0	150	61.1461	11181	CCAB-4a3-2.raw	F601	3.12	1
FALSE	High	Sequest HT (A2)	Unambiguous	FIINASQPANDKIFDVSAFEK		1	ACRE_091090	ACRE_091090	1	3	0.5449	0	1	1	785.404	2354.2	2354.2	-1.77	-0.00139	CID (Collision Induced Dissociation)	MS2	46.3691	150	51.8224	12289	CCAB-4a2-2.raw	F599	3.12	1
FALSE	High	Sequest HT (A2)	Unambiguous	FIINASQPANDKIFDVSAFEK		1	ACRE_091090	ACRE_091090	1	3	0.5032	0	1	1	785.406	2354.2	2354.2	0.21	0.00016	CID (Collision Induced Dissociation)	MS2	78.7576	150	42.7025	6746	CCAB-1a.raw	F578	3.12	1
FALSE	High	Sequest HT (A2)	Unambiguous	SGGKIEVIAHNELSGR		1	ACRE_091090	ACRE_091090	1	4	0.4872	0	1	1	417.478	1666.89	1666.89	0.82	0.00034	CID (Collision Induced Dissociation)	MS2	26.5917	33.01	47.2424	10384	CCAB-2a3-2.raw	F587	3.12	1
FALSE	High	Sequest HT (A2)	Unambiguous	SGGKIEVIAHNELSGR		1	ACRE_091090	ACRE_091090	1	4	0.4744	0	1	1	417.478	1666.89	1666.89	1.16	0.00048	CID (Collision Induced Dissociation)	MS2	48.0966	103.752	55.3965	13065	CCAB-4a2-2.raw	F599	3.12	1
FALSE	High	Sequest HT (A2)	Unambiguous	KFIINASQPANDKIFDVSAFEK		1	ACRE_091090	ACRE_091090	2	3	0.4167	0	1	1	828.109	2482.31	2482.3	5.68	0.0047	CID (Collision Induced Dissociation)	MS2	65.2431	150	48.444	9806	WT-a.raw	F635	3.12	1
FALSE	High	Sequest HT (A2)	Unambiguous	SGGKIEVIAHNELSGR		1	ACRE_091090	ACRE_091090	1	3	0.5673	0	1	1	556.3	1666.89	1666.89	-0.52	-0.00029	CID (Collision Induced Dissociation)	MS2	75.1565	150	59.2994	10016	CCAB-4a1.raw	F596	3.12	1
FALSE	High	Sequest HT (A2)	Unambiguous	TNNLGDAVVIQQK		1	ACRE_091090	ACRE_091090	0	2	0.3846	0	1	1	700.378	1399.75	1399.75	-3.15	-0.0022	CID (Collision Induced Dissociation)	MS2	54.3929	52.359	37.3217	7064	CCAB-2a3-2.raw	F587	3.12	1
FALSE	High	Sequest HT (A2)	Unambiguous	SGGKIEVIAHNELSGR		1	ACRE_091090	ACRE_091090	1	2	0.6752	0	1	1	833.947	1666.89	1666.89	-0.63	-0.00052	CID (Collision Induced Dissociation)	MS2	59.0749	150	55.183	12130	CCAB-3a3-2.raw	F595	3.11	1
FALSE	High	Sequest HT (A2)	Unambiguous	FIINASQPANDKIFDVSAFEK		1	ACRE_091090	ACRE_091090	1	3	0.463	0	1	1	785.405	2354.2	2354.2	-0.82	-0.00064	CID (Collision Induced Dissociation)	MS2	60.5865	150	58.9392	13868	CCAB-4a2-2.raw	F599	3.11	1
FALSE	High	Sequest HT (A2)	Unambiguous	KFIINASQPANDK		1	ACRE_091090	ACRE_091090	1	2	0.3601	0	1	1	723.393	1445.78	1445.77	3.05	0.00221	CID (Collision Induced Dissociation)	MS2	56.0075	150	33.3544	4581	CCAB-3a2.raw	F592	3.11	1
FALSE	High	Sequest HT (A2)	Unambiguous	FIINASQPANDK		1	ACRE_091090	ACRE_091090	0	2	0.4161	0	1	1	659.343	1317.68	1317.68	-1.25	-0.00082	CID (Collision Induced Dissociation)	MS2	61.6683	68.904	36.2523	6381	CCAB-3a2-2.raw	F593	3.1	1
FALSE	High	Sequest HT (A2)	Unambiguous	SGGKIEVIAHNELSGR		1	ACRE_091090	ACRE_091090	1	2	0.6871	0	1	1	833.947	1666.89	1666.89	-0.5	-0.00042	CID (Collision Induced Dissociation)	MS2	30.48	150	57.993	10600	CCAB-3a3.raw	F594	3.1	1
FALSE	High	Sequest HT (A2)	Unambiguous	IEVIAHNELSGR		1	ACRE_091090	ACRE_091090	0	2	0.5581	0	1	1	669.361	1337.72	1337.72	-1.45	-0.00097	CID (Collision Induced Dissociation)	MS2	28.5023	60.419	33.5671	4781	CCAB-4a2.raw	F598	3.1	1
FALSE	High	Sequest HT (A2)	Unambiguous	IEVIAHNELSGR		1	ACRE_091090	ACRE_091090	0	2	0.5419	0	1	1	669.364	1337.72	1337.72	2.01	0.00134	CID (Collision Induced Dissociation)	MS2	15.6144	72.68	34.0519	5254	CCAB-4a1-2.raw	F597	3.1	1
FALSE	High	Sequest HT (A2)	Unambiguous	SGGKIEVIAHNELSGR		1	ACRE_091090	ACRE_091090	1	3	0.3657	0	1	1	556.301	1666.89	1666.89	0.93	0.00052	CID (Collision Induced Dissociation)	MS2	72.465	150	36.3774	5239	CCAB-1a.raw	F578	3.09	1
FALSE	High	Sequest HT (A2)	Unambiguous	TNNLGDAVVIQQK		1	ACRE_091090	ACRE_091090	0	2	0.4563	0	1	1	700.381	1399.76	1399.75	1.04	0.00073	CID (Collision Induced Dissociation)	MS2	33.2151	150	62.5377	14633	CCAB-4a2-2.raw	F599	3.09	1
FALSE	High	Sequest HT (A2)	Unambiguous	IEVIAHNELSGR		1	ACRE_091090	ACRE_091090	0	2	0.5649	0	1	1	669.361	1337.72	1337.72	-1.2	-0.0008	CID (Collision Induced Dissociation)	MS2	25.0164	150	62.4082	13698	CCAB-3a3-2.raw	F595	3.08	1
FALSE	High	Sequest HT (A2)	Unambiguous	KFIINASQPANDK		1	ACRE_091090	ACRE_091090	1	2	0.0974	0	1	1	723.378	1445.75	1445.77	-17.33	-0.01253	CID (Collision Induced Dissociation)	MS2	69.9238	125.287	35.033	5961	CCAB-3a2-2.raw	F593	3.08	1
FALSE	High	Sequest HT (A2)	Unambiguous	TNNLGDAVVIQQK		1	ACRE_091090	ACRE_091090	0	2	0.5357	0	1	1	700.381	1399.75	1399.75	0.4	0.00028	CID (Collision Induced Dissociation)	MS2	13.91	150	63.4962	13908	CCAB-3a3-2.raw	F595	3.08	1
FALSE	High	Sequest HT (A2)	Unambiguous	SGGKIEVIAHNELSGR		1	ACRE_091090	ACRE_091090	1	3	0.6331	0	1	1	556.3	1666.89	1666.89	-0.32	-0.00018	CID (Collision Induced Dissociation)	MS2	50.5968	150	59.1642	10480	CCAB-3a2.raw	F592	3.08	1
FALSE	High	Sequest HT (A2)	Unambiguous	TNNLGDAVVIQQK		1	ACRE_091090	ACRE_091090	0	2	0.4267	0	1	1	700.381	1399.75	1399.75	0.37	0.00026	CID (Collision Induced Dissociation)	MS2	20.6506	150	52.2737	11550	CCAB-3a3-2.raw	F595	3.07	1
FALSE	High	Sequest HT (A2)	Unambiguous	TNNLGDAVVIQQK		1	ACRE_091090	ACRE_091090	0	2	0.4397	0	1	1	700.381	1399.75	1399.75	0.56	0.00039	CID (Collision Induced Dissociation)	MS2	80.5219	98.524	43.0095	8934	CCAB-3a3-2.raw	F595	3.07	1
FALSE	High	Sequest HT (A2)	Unambiguous	SGGKIEVIAHNELSGR		1	ACRE_091090	ACRE_091090	1	3	0.5635	0	1	1	556.3	1666.89	1666.89	-0.93	-0.00051	CID (Collision Induced Dissociation)	MS2	79.3671	150	60.2125	11019	CCAB-4a2.raw	F598	3.07	1
FALSE	High	Sequest HT (A2)	Unambiguous	TNNLGDAVVIQQK		1	ACRE_091090	ACRE_091090	0	2	0.4593	0	1	1	700.38	1399.75	1399.75	-1.51	-0.00106	CID (Collision Induced Dissociation)	MS2	66.9672	150	64.8251	14299	CCAB-2a3-2.raw	F587	3.07	1
FALSE	High	Sequest HT (A2)	Unambiguous	SGGKIEVIAHNELSGR		1	ACRE_091090	ACRE_091090	1	3	0.5375	0	1	1	556.301	1666.89	1666.89	0.76	0.00042	CID (Collision Induced Dissociation)	MS2	28.8452	150	61.8243	11244	CCAB-3a3.raw	F594	3.07	1
FALSE	High	Sequest HT (A2)	Unambiguous	SGGKIEVIAHNELSGR		1	ACRE_091090	ACRE_091090	1	3	0.5603	0	1	1	556.3	1666.89	1666.89	-0.11	-6e-05	CID (Collision Induced Dissociation)	MS2	50.6553	150	55.5376	10243	CCAB-4a2.raw	F598	3.07	1
FALSE	High	Sequest HT (A2)	Unambiguous	SGGKIEVIAHNELSGR		1	ACRE_091090	ACRE_091090	1	3	0.5277	0	1	1	556.301	1666.89	1666.89	1.37	0.00076	CID (Collision Induced Dissociation)	MS2	73.792	150	56.3333	11566	CCAB-3a2-2.raw	F593	3.07	1
FALSE	High	Sequest HT (A2)	Unambiguous	FYNVVNDEADEDED		1	ACRE_091090	ACRE_091090	0	2	0.6961	0	1	1	837.325	1673.64	1673.64	-1.36	-0.00114	CID (Collision Induced Dissociation)	MS2	36.9709	150	52.3099	11558	CCAB-3a3-2.raw	F595	3.06	1
FALSE	High	Sequest HT (A2)	Unambiguous	TNNLGDAVVIQQK		1	ACRE_091090	ACRE_091090	0	2	0.4935	0	1	1	700.379	1399.75	1399.75	-1.74	-0.00122	CID (Collision Induced Dissociation)	MS2	30.642	150	61.0295	13608	CCAB-2a3-2.raw	F587	3.06	1
FALSE	High	Sequest HT (A2)	Unambiguous	SGGKIEVIAHNELSGR		1	ACRE_091090	ACRE_091090	1	3	0.4902	0	1	1	556.3	1666.89	1666.89	-0.19	-0.00011	CID (Collision Induced Dissociation)	MS2	81.1887	150	48.3819	9958	CCAB-3a2-2.raw	F593	3.06	1
FALSE	High	Sequest HT (A2)	Unambiguous	TNNLGDAVVIQQK		1	ACRE_091090	ACRE_091090	0	2	0.4804	0	1	1	700.381	1399.75	1399.75	0.64	0.00045	CID (Collision Induced Dissociation)	MS2	70.7256	150	62.2274	13846	CCAB-2a3-2.raw	F587	3.06	1
FALSE	High	Sequest HT (A2)	Unambiguous	FIINASQPANDKIFDVSAFEK		1	ACRE_091090	ACRE_091090	1	3	0.4902	0	1	1	785.406	2354.2	2354.2	0.91	0.00072	CID (Collision Induced Dissociation)	MS2	85.7614	150	44.3225	7119	CCAB-1a.raw	F578	3.06	1
FALSE	High	Sequest HT (A2)	Unambiguous	IEVIAHNELSGR		1	ACRE_091090	ACRE_091090	0	2	0.598	0	1	1	669.363	1337.72	1337.72	0.56	0.00037	CID (Collision Induced Dissociation)	MS2	30.9138	150	62.6532	13745	CCAB-3a3-2.raw	F595	3.06	1
FALSE	High	Sequest HT (A2)	Unambiguous	SGGKIEVIAHNELSGR		1	ACRE_091090	ACRE_091090	1	3	0.5784	0	1	1	556.3	1666.89	1666.89	-0.62	-0.00034	CID (Collision Induced Dissociation)	MS2	41.2461	150	54.3665	8609	CCAB-1a.raw	F578	3.06	1
FALSE	High	Sequest HT (A2)	Unambiguous	SGGKIEVIAHNELSGR		1	ACRE_091090	ACRE_091090	1	3	0.4918	0	1	1	556.3	1666.89	1666.89	-0.95	-0.00053	CID (Collision Induced Dissociation)	MS2	36.0938	150	44.81	7856	CCAB-4a2.raw	F598	3.05	1
FALSE	High	Sequest HT (A2)	Unambiguous	TNNLGDAVVIQQK		1	ACRE_091090	ACRE_091090	0	2	0.4459	0	1	1	700.38	1399.75	1399.75	-0.2	-0.00014	CID (Collision Induced Dissociation)	MS2	76.4402	63.782	33.1971	5759	CCAB-4a2-2.raw	F599	3.05	1
FALSE	High	Sequest HT (A2)	Unambiguous	TNNLGDAVVIQQK		1	ACRE_091090	ACRE_091090	0	2	0.4787	0	1	1	700.38	1399.75	1399.75	-0.63	-0.00044	CID (Collision Induced Dissociation)	MS2	29.7184	150	64.6329	15036	CCAB-4a2-2.raw	F599	3.05	1
FALSE	High	Sequest HT (A2)	Unambiguous	SGGKIEVIAHNELSGR		1	ACRE_091090	ACRE_091090	1	3	0.4243	0	1	1	556.3	1666.89	1666.89	-0.81	-0.00045	CID (Collision Induced Dissociation)	MS2	44.7915	31.853	45.6661	10391	CCAB-4a2-2.raw	F599	3.04	1
FALSE	High	Sequest HT (A2)	Unambiguous	FIINASQPANDKIFDVSAFEK		1	ACRE_091090	ACRE_091090	1	3	0.5724	0	1	1	785.405	2354.2	2354.2	-1.26	-0.00099	CID (Collision Induced Dissociation)	MS2	21.2259	97.041	48.9108	8700	CCAB-3a3.raw	F594	3.04	1
FALSE	High	Sequest HT (A2)	Unambiguous	TNNLGDAVVIQQK		1	ACRE_091090	ACRE_091090	0	2	0.4836	0	1	1	700.381	1399.75	1399.75	0.07	5e-05	CID (Collision Induced Dissociation)	MS2	57.6026	150	52.5858	11803	CCAB-2a3-2.raw	F587	3.04	1
FALSE	High	Sequest HT (A2)	Unambiguous	SGGKIEVIAHNELSGR		1	ACRE_091090	ACRE_091090	1	3	0.5248	0	1	1	556.301	1666.89	1666.89	-0.03	-2e-05	CID (Collision Induced Dissociation)	MS2	15.7437	150	60.237	11025	CCAB-3a3.raw	F594	3.03	1
FALSE	High	Sequest HT (A2)	Unambiguous	IEVIAHNELSGR		1	ACRE_091090	ACRE_091090	0	2	0.5479	0	1	1	669.361	1337.72	1337.72	-1.37	-0.00091	CID (Collision Induced Dissociation)	MS2	31.6346	31.467	35.85	6394	CCAB-3a3-2.raw	F595	3.03	1
FALSE	High	Sequest HT (A2)	Unambiguous	SGGKIEVIAHNELSGR		1	ACRE_091090	ACRE_091090	1	3	0.5298	0	1	1	556.3	1666.89	1666.89	-1.2	-0.00067	CID (Collision Induced Dissociation)	MS2	83.2404	150	56.2806	15299	CCAB-2b-2.raw	F589	3.02	1
FALSE	High	Sequest HT (A2)	Unambiguous	SGGKIEVIAHNELSGR		1	ACRE_091090	ACRE_091090	1	3	0.4917	0	1	1	556.301	1666.89	1666.89	0.67	0.00037	CID (Collision Induced Dissociation)	MS2	75.544	150	38.4056	5740	CCAB-1a.raw	F578	3.01	1
FALSE	High	Sequest HT (A2)	Unambiguous	SGGKIEVIAHNELSGR		1	ACRE_091090	ACRE_091090	1	2	0.6711	0	1	1	833.947	1666.89	1666.89	-0.19	-0.00016	CID (Collision Induced Dissociation)	MS2	50.4517	150	55.473	10119	CCAB-4a3-2.raw	F601	3.01	1
FALSE	High	Sequest HT (A2)	Unambiguous	IEVIAHNELSGR		1	ACRE_091090	ACRE_091090	0	2	0.4452	0	1	1	669.361	1337.72	1337.72	-1.44	-0.00096	CID (Collision Induced Dissociation)	MS2	38.6891	60.973	34.4256	5748	CCAB-3a2-2.raw	F593	3.01	1
FALSE	High	Sequest HT (A2)	Unambiguous	SGGKIEVIAHNELSGR		1	ACRE_091090	ACRE_091090	1	3	0.5249	0	1	1	556.302	1666.89	1666.89	2.39	0.00133	CID (Collision Induced Dissociation)	MS2	55.4046	88.512	50.3711	10026	CCAB-4a1-2.raw	F597	3.01	1
FALSE	High	Sequest HT (A2)	Unambiguous	TNNLGDAVVIQQK		1	ACRE_091090	ACRE_091090	0	2	0.4467	0	1	1	700.381	1399.75	1399.75	0.21	0.00015	CID (Collision Induced Dissociation)	MS2	42.769	150	62.4318	13885	CCAB-2a3-2.raw	F587	3	1
FALSE	High	Sequest HT (A2)	Unambiguous	TNNLGDAVVIQQK		1	ACRE_091090	ACRE_091090	0	2	0.3867	0	1	1	700.381	1399.75	1399.75	0.23	0.00016	CID (Collision Induced Dissociation)	MS2	40.1602	150	62.9955	12950	CCAB-3a2-2.raw	F593	3	1
FALSE	High	Sequest HT (A2)	Unambiguous	IEVIAHNELSGR		1	ACRE_091090	ACRE_091090	0	2	0.5217	0	1	1	669.361	1337.72	1337.72	-1.35	-0.0009	CID (Collision Induced Dissociation)	MS2	85.5099	150	33.597	4649	CCAB-3a2.raw	F592	2.99	1
FALSE	High	Sequest HT (A2)	Unambiguous	FYNVVNDEADEDED		1	ACRE_091090	ACRE_091090	0	2	0.7993	0	1	1	837.324	1673.64	1673.64	-2.64	-0.00221	CID (Collision Induced Dissociation)	MS2	28.1595	150	37.2309	6078	CCAB-3a1.raw	F590	2.99	1
FALSE	High	Sequest HT (A2)	Unambiguous	SGGKIEVIAHNELSGR		1	ACRE_091090	ACRE_091090	1	3	0.4615	0	1	1	556.3	1666.89	1666.89	-0.37	-0.0002	CID (Collision Induced Dissociation)	MS2	60.654	150	61.6613	13737	CCAB-2a3-2.raw	F587	2.99	1
FALSE	High	Sequest HT (A2)	Unambiguous	SGGKIEVIAHNELSGR		1	ACRE_091090	ACRE_091090	1	4	0.4849	0	1	1	417.478	1666.89	1666.89	0.71	0.0003	CID (Collision Induced Dissociation)	MS2	34.8907	46.047	50.3984	11350	CCAB-2a3-2.raw	F587	2.99	1
FALSE	High	Sequest HT (A2)	Unambiguous	TNNLGDAVVIQQK		1	ACRE_091090	ACRE_091090	0	2	0.453	0	1	1	700.38	1399.75	1399.75	-0.21	-0.00015	CID (Collision Induced Dissociation)	MS2	47.7619	150	51.6925	12260	CCAB-4a2-2.raw	F599	2.98	1
FALSE	High	Sequest HT (A2)	Unambiguous	IEVIAHNELSGR		1	ACRE_091090	ACRE_091090	0	2	0.4463	0	1	1	669.361	1337.71	1337.72	-1.75	-0.00117	CID (Collision Induced Dissociation)	MS2	51.2563	102.553	34.4998	5041	CCAB-4a2.raw	F598	2.98	1
FALSE	High	Sequest HT (A2)	Unambiguous	FIINASQPANDKIFDVSAFEK		1	ACRE_091090	ACRE_091090	1	3	0.5369	0	1	1	785.405	2354.2	2354.2	-0.59	-0.00047	CID (Collision Induced Dissociation)	MS2	34.8515	150	48.753	8973	CCAB-4a3-2.raw	F601	2.98	1
FALSE	High	Sequest HT (A2)	Unambiguous	KFIINASQPANDK		1	ACRE_091090	ACRE_091090	1	2	0.2181	0	1	1	723.39	1445.77	1445.77	-1.72	-0.00124	CID (Collision Induced Dissociation)	MS2	52.3172	32.989	33.7923	5988	CCAB-4a2-2.raw	F599	2.98	1
FALSE	High	Sequest HT (A2)	Unambiguous	TNNLGDAVVIQQK		1	ACRE_091090	ACRE_091090	0	2	0.5926	0	1	1	700.381	1399.75	1399.75	-0.03	-2e-05	CID (Collision Induced Dissociation)	MS2	50.1497	150	64.0433	14174	CCAB-2a3-2.raw	F587	2.97	1
FALSE	High	Sequest HT (A2)	Unambiguous	TNNLGDAVVIQQK		1	ACRE_091090	ACRE_091090	0	3	0.4377	0	1	1	467.257	1399.76	1399.75	1.61	0.00075	CID (Collision Induced Dissociation)	MS2	4.70395	7.819	35.0681	4133	CCAB-4a3.raw	F600	2.97	1
FALSE	High	Sequest HT (A2)	Unambiguous	TNNLGDAVVIQQK		1	ACRE_091090	ACRE_091090	0	2	0.431	0	1	1	700.378	1399.75	1399.75	-3.29	-0.0023	CID (Collision Induced Dissociation)	MS2	64.1055	150	51.4285	12202	CCAB-4a2-2.raw	F599	2.97	1
FALSE	High	Sequest HT (A2)	Unambiguous	FIINASQPANDK		1	ACRE_091090	ACRE_091090	0	2	0.4781	0	1	1	659.343	1317.68	1317.68	-0.13	-9e-05	CID (Collision Induced Dissociation)	MS2	69.3936	137.55	31.6056	4013	CCAB-1a.raw	F578	2.97	1
FALSE	High	Sequest HT (A2)	Unambiguous	IEVIAHNELSGR		1	ACRE_091090	ACRE_091090	0	3	0.6431	0	1	1	446.578	1337.72	1337.72	0.74	0.00033	CID (Collision Induced Dissociation)	MS2	23.7433	6.154	35.6633	6324	CCAB-3a3-2.raw	F595	2.97	1
FALSE	High	Sequest HT (A2)	Unambiguous	TNNLGDAVVIQQK		1	ACRE_091090	ACRE_091090	0	2	0.4007	0	1	1	700.381	1399.75	1399.75	0.73	0.00051	CID (Collision Induced Dissociation)	MS2	61.5505	150	65.7046	14433	CCAB-2a3-2.raw	F587	2.97	1
FALSE	High	Sequest HT (A2)	Unambiguous	SGGKIEVIAHNELSGR		1	ACRE_091090	ACRE_091090	1	3	0.2736	0	1	1	556.302	1666.89	1666.89	2.76	0.00153	CID (Collision Induced Dissociation)	MS2	55.7676	150	62.6455	13928	CCAB-2a3-2.raw	F587	2.96	1
FALSE	High	Sequest HT (A2)	Unambiguous	IEVIAHNELSGR		1	ACRE_091090	ACRE_091090	0	3	0.6	0	1	1	446.577	1337.72	1337.72	0.44	0.0002	CID (Collision Induced Dissociation)	MS2	30.9993	27.928	35.8243	5607	CCAB-4a3-2.raw	F601	2.95	1
FALSE	High	Sequest HT (A2)	Unambiguous	SGGKIEVIAHNELSGR		1	ACRE_091090	ACRE_091090	1	3	0.461	0	1	1	556.299	1666.88	1666.89	-2.11	-0.00117	CID (Collision Induced Dissociation)	MS2	52.2473	150	47.0709	8599	CCAB-4a3-2.raw	F601	2.95	1
FALSE	High	Sequest HT (A2)	Unambiguous	TNNLGDAVVIQQK		1	ACRE_091090	ACRE_091090	0	3	0.3559	0	1	1	467.257	1399.76	1399.75	2.68	0.00125	CID (Collision Induced Dissociation)	MS2	5.54788	5.815	34.8413	4987	CCAB-3a2.raw	F592	2.95	1
FALSE	High	Sequest HT (A2)	Unambiguous	TNNLGDAVVIQQK		1	ACRE_091090	ACRE_091090	0	2	0.4169	0	1	1	700.38	1399.75	1399.75	-1.25	-0.00087	CID (Collision Induced Dissociation)	MS2	53.0951	150	62.924	11463	CCAB-4a3-2.raw	F601	2.95	1
FALSE	High	Sequest HT (A2)	Unambiguous	SGGKIEVIAHNELSGR		1	ACRE_091090	ACRE_091090	1	3	0.1186	0	1	1	556.3	1666.89	1666.89	-0.82	-0.00046	CID (Collision Induced Dissociation)	MS2	71.6498	150	45.7152	7436	CCAB-1a.raw	F578	2.95	1
FALSE	High	Sequest HT (A2)	Unambiguous	TNNLGDAVVIQQK		1	ACRE_091090	ACRE_091090	0	2	0.585	0	1	1	700.383	1399.76	1399.75	3.22	0.00225	CID (Collision Induced Dissociation)	MS2	19.1505	150	58.7985	10786	CCAB-4a3-2.raw	F601	2.94	1
FALSE	High	Sequest HT (A2)	Unambiguous	TNNLGDAVVIQQK		1	ACRE_091090	ACRE_091090	0	2	0.3741	0	1	1	700.381	1399.75	1399.75	0.4	0.00028	CID (Collision Induced Dissociation)	MS2	49.8119	150	61.8243	14489	CCAB-4a2-2.raw	F599	2.94	1
FALSE	High	Sequest HT (A2)	Unambiguous	TNNLGDAVVIQQK		1	ACRE_091090	ACRE_091090	0	2	0.3571	0	1	1	700.379	1399.75	1399.75	-2.08	-0.00146	CID (Collision Induced Dissociation)	MS2	37.3828	150	52.0177	9416	CCAB-3a3.raw	F594	2.94	1
FALSE	High	Sequest HT (A2)	Unambiguous	SGGKIEVIAHNELSGR		1	ACRE_091090	ACRE_091090	1	3	0.5578	0	1	1	556.3	1666.89	1666.89	-0.6	-0.00034	CID (Collision Induced Dissociation)	MS2	54.9766	150	41.093	6878	CCAB-4a2.raw	F598	2.94	1
FALSE	High	Sequest HT (A2)	Unambiguous	SGGKIEVIAHNELSGR		1	ACRE_091090	ACRE_091090	1	2	0.517	0	1	1	833.962	1666.92	1666.89	18.31	0.01526	CID (Collision Induced Dissociation)	MS2	51.5333	150	46.1456	9898	CCAB-3a3-2.raw	F595	2.94	1
FALSE	High	Sequest HT (A2)	Unambiguous	SGGKIEVIAHNELSGR		1	ACRE_091090	ACRE_091090	1	3	0.3571	0	1	1	556.299	1666.88	1666.89	-2.79	-0.00155	CID (Collision Induced Dissociation)	MS2	83.5791	147.707	51.0212	12108	CCAB-4a2-2.raw	F599	2.94	1
FALSE	High	Sequest HT (A2)	Unambiguous	FIINASQPANDKIFDVSAFEK		1	ACRE_091090	ACRE_091090	1	3	0.4966	0	1	1	785.407	2354.21	2354.2	1.27	0.001	CID (Collision Induced Dissociation)	MS2	69.599	150	49.0229	10117	CCAB-3a2-2.raw	F593	2.94	1
FALSE	High	Sequest HT (A2)	Unambiguous	SGGKIEVIAHNELSGR		1	ACRE_091090	ACRE_091090	1	3	0.5666	0	1	1	556.301	1666.89	1666.89	0.92	0.00051	CID (Collision Induced Dissociation)	MS2	88.0567	150	57.1315	15504	CCAB-2b-2.raw	F589	2.93	1
FALSE	High	Sequest HT (A2)	Unambiguous	IEVIAHNELSGR		1	ACRE_091090	ACRE_091090	0	2	0.4642	0	1	1	669.361	1337.72	1337.72	-1.59	-0.00106	CID (Collision Induced Dissociation)	MS2	53.0558	150	50.4693	9082	CCAB-3a3.raw	F594	2.93	1
FALSE	High	Sequest HT (A2)	Unambiguous	IEVIAHNELSGR		1	ACRE_091090	ACRE_091090	0	2	0.6416	0	1	1	669.362	1337.72	1337.72	-0.35	-0.00024	CID (Collision Induced Dissociation)	MS2	34.4766	150	52.0766	11514	CCAB-3a3-2.raw	F595	2.93	1
FALSE	High	Sequest HT (A2)	Unambiguous	IEVIAHNELSGR		1	ACRE_091090	ACRE_091090	0	3	0.529	0	1	1	446.578	1337.72	1337.72	0.59	0.00026	CID (Collision Induced Dissociation)	MS2	50.2894	150	49.3312	8802	CCAB-3a3.raw	F594	2.93	1
FALSE	High	Sequest HT (A2)	Unambiguous	SGGKIEVIAHNELSGR		1	ACRE_091090	ACRE_091090	1	3	0.4676	0	1	1	556.305	1666.9	1666.89	7.13	0.00396	CID (Collision Induced Dissociation)	MS2	82.1705	150	63.0695	11382	CCAB-3a3.raw	F594	2.93	1
FALSE	High	Sequest HT (A2)	Unambiguous	FIINASQPANDKIFDVSAFEK		1	ACRE_091090	ACRE_091090	1	3	0.4027	0	1	1	785.404	2354.2	2354.2	-2.83	-0.00222	CID (Collision Induced Dissociation)	MS2	69.5147	150	58.3924	13748	CCAB-4a2-2.raw	F599	2.93	1
FALSE	High	Sequest HT (A2)	Unambiguous	TNNLGDAVVIQQK		1	ACRE_091090	ACRE_091090	0	3	0.3891	0	1	1	467.256	1399.75	1399.75	0.4	0.00018	CID (Collision Induced Dissociation)	MS2	43.1535	147.792	31.1226	3889	CCAB-1a.raw	F578	2.93	1
FALSE	High	Sequest HT (A2)	Unambiguous	TNNLGDAVVIQQK		1	ACRE_091090	ACRE_091090	0	2	0.4403	0	1	1	700.38	1399.75	1399.75	-0.47	-0.00033	CID (Collision Induced Dissociation)	MS2	52.3591	150	60.8401	14285	CCAB-4a2-2.raw	F599	2.93	1
FALSE	High	Sequest HT (A2)	Unambiguous	IEVIAHNELSGR		1	ACRE_091090	ACRE_091090	0	2	0.4949	0	1	1	669.362	1337.72	1337.72	-0.05	-4e-05	CID (Collision Induced Dissociation)	MS2	47.5053	62.737	38.0052	7197	CCAB-3a3-2.raw	F595	2.93	1
FALSE	High	Sequest HT (A2)	Unambiguous	TNNLGDAVVIQQK		1	ACRE_091090	ACRE_091090	0	2	0.4846	0	1	1	700.379	1399.75	1399.75	-1.79	-0.00125	CID (Collision Induced Dissociation)	MS2	54.1277	150	43.5204	9106	CCAB-3a3-2.raw	F595	2.93	1
FALSE	High	Sequest HT (A2)	Unambiguous	IEVIAHNELSGR		1	ACRE_091090	ACRE_091090	0	2	0.5822	0	1	1	669.363	1337.72	1337.72	0.54	0.00036	CID (Collision Induced Dissociation)	MS2	65.4308	125.04	35.1063	5141	CCAB-3a3.raw	F594	2.92	1
FALSE	High	Sequest HT (A2)	Unambiguous	TNNLGDAVVIQQK		1	ACRE_091090	ACRE_091090	0	2	0.4521	0	1	1	700.383	1399.76	1399.75	3.03	0.00212	CID (Collision Induced Dissociation)	MS2	31.0953	150	59.5831	10914	CCAB-3a3.raw	F594	2.92	1
FALSE	High	Sequest HT (A2)	Unambiguous	SGGKIEVIAHNELSGR		1	ACRE_091090	ACRE_091090	1	2	0.5582	0	1	1	833.947	1666.89	1666.89	-0.76	-0.00064	CID (Collision Induced Dissociation)	MS2	50.3443	150	56.8497	10360	CCAB-3a3.raw	F594	2.92	1
FALSE	High	Sequest HT (A2)	Unambiguous	SGGKIEVIAHNELSGR		1	ACRE_091090	ACRE_091090	1	4	0.4192	0	1	1	417.478	1666.89	1666.89	0.77	0.00032	CID (Collision Induced Dissociation)	MS2	59.6418	150	47.045	8268	CCAB-3a3.raw	F594	2.91	1
FALSE	High	Sequest HT (A2)	Unambiguous	SGGKIEVIAHNELSGR		1	ACRE_091090	ACRE_091090	1	4	0.4605	0	1	1	417.477	1666.89	1666.89	0.33	0.00014	CID (Collision Induced Dissociation)	MS2	28.7834	150	48.0016	8806	CCAB-4a3-2.raw	F601	2.91	1
FALSE	High	Sequest HT (A2)	Unambiguous	TNNLGDAVVIQQK		1	ACRE_091090	ACRE_091090	0	2	0.4502	0	1	1	700.38	1399.75	1399.75	-0.76	-0.00053	CID (Collision Induced Dissociation)	MS2	32.0158	150	62.6263	11416	CCAB-4a3-2.raw	F601	2.91	1
FALSE	High	Sequest HT (A2)	Unambiguous	SGGKIEVIAHNELSGR		1	ACRE_091090	ACRE_091090	1	3	0.5842	0	1	1	556.299	1666.88	1666.89	-2.35	-0.00131	CID (Collision Induced Dissociation)	MS2	38.8995	150	58.2147	15756	CCAB-2b-2.raw	F589	2.91	1
FALSE	High	Sequest HT (A2)	Unambiguous	TNNLGDAVVIQQK		1	ACRE_091090	ACRE_091090	0	2	0.431	0	1	1	700.38	1399.75	1399.75	-0.42	-0.00029	CID (Collision Induced Dissociation)	MS2	43.8893	150	52.5396	12445	CCAB-4a2-2.raw	F599	2.9	1
FALSE	High	Sequest HT (A2)	Unambiguous	SGGKIEVIAHNELSGR		1	ACRE_091090	ACRE_091090	1	3	0.3552	0	1	1	556.301	1666.89	1666.89	0.12	6e-05	CID (Collision Induced Dissociation)	MS2	44.2664	150	50.3235	7644	CCAB-4a3.raw	F600	2.9	1
FALSE	High	Sequest HT (A2)	Unambiguous	FIINASQPANDK		1	ACRE_091090	ACRE_091090	0	2	0.4552	0	1	1	659.343	1317.68	1317.68	-0.89	-0.00059	CID (Collision Induced Dissociation)	MS2	40.1963	150	35.949	4348	CCAB-4a3.raw	F600	2.9	1
FALSE	High	Sequest HT (A2)	Unambiguous	TNNLGDAVVIQQK		1	ACRE_091090	ACRE_091090	0	2	0.1488	0	1	1	700.37	1399.73	1399.75	-14.57	-0.01019	CID (Collision Induced Dissociation)	MS2	50.241	23.223	36.359	6703	CCAB-2a3-2.raw	F587	2.89	1
FALSE	High	Sequest HT (A2)	Unambiguous	TNNLGDAVVIQQK		1	ACRE_091090	ACRE_091090	0	2	0.4948	0	1	1	700.381	1399.75	1399.75	-0.08	-6e-05	CID (Collision Induced Dissociation)	MS2	75.9065	150	65.5387	14247	CCAB-3a3-2.raw	F595	2.89	1
FALSE	High	Sequest HT (A2)	Unambiguous	FYNVVNDEADEDED		1	ACRE_091090	ACRE_091090	0	2	0.7682	0	1	1	837.326	1673.65	1673.64	0.41	0.00034	CID (Collision Induced Dissociation)	MS2	35.2062	150	39.2584	7747	CCAB-2a3-2.raw	F587	2.89	1
FALSE	High	Sequest HT (A2)	Unambiguous	FIINASQPANDKIFDVSAFEK		1	ACRE_091090	ACRE_091090	1	3	0.5502	0	1	1	785.404	2354.2	2354.2	-1.88	-0.00148	CID (Collision Induced Dissociation)	MS2	34.8317	150	55.7552	13148	CCAB-4a2-2.raw	F599	2.89	1
FALSE	High	Sequest HT (A2)	Unambiguous	IEVIAHNELSGR		1	ACRE_091090	ACRE_091090	0	2	0.5156	0	1	1	669.361	1337.72	1337.72	-1.53	-0.00102	CID (Collision Induced Dissociation)	MS2	63.4294	150	56.9676	12535	CCAB-3a3-2.raw	F595	2.89	1
FALSE	High	Sequest HT (A2)	Unambiguous	SGGKIEVIAHNELSGR		1	ACRE_091090	ACRE_091090	1	3	0.4118	0	1	1	556.3	1666.89	1666.89	-0.9	-0.0005	CID (Collision Induced Dissociation)	MS2	56.7924	150	64.978	14165	CCAB-3a3-2.raw	F595	2.89	1
FALSE	High	Sequest HT (A2)	Unambiguous	TNNLGDAVVIQQK		1	ACRE_091090	ACRE_091090	0	2	0.4583	0	1	1	700.382	1399.76	1399.75	1.45	0.00102	CID (Collision Induced Dissociation)	MS2	52.5312	150	65.5835	15196	CCAB-4a2-2.raw	F599	2.88	1
FALSE	High	Sequest HT (A2)	Unambiguous	FIINASQPANDKIFDVSAFEK		1	ACRE_091090	ACRE_091090	1	3	0.4236	0	1	1	785.407	2354.21	2354.2	1.74	0.00136	CID (Collision Induced Dissociation)	MS2	30.6708	150	44.1587	8826	WT-a.raw	F635	2.88	1
FALSE	High	Sequest HT (A2)	Unambiguous	SGGKIEVIAHNELSGR		1	ACRE_091090	ACRE_091090	1	3	0.4583	0	1	1	556.3	1666.88	1666.89	-1.66	-0.00092	CID (Collision Induced Dissociation)	MS2	81.9648	150	43.5014	7775	CCAB-4a3-2.raw	F601	2.88	1
FALSE	High	Sequest HT (A2)	Unambiguous	KFIINASQPANDK		1	ACRE_091090	ACRE_091090	1	3	0.3924	0	1	1	482.597	1445.78	1445.77	0.9	0.00043	CID (Collision Induced Dissociation)	MS2	22.5331	11.919	34.4022	5164	CCAB-4a3-2.raw	F601	2.88	1
FALSE	High	Sequest HT (A2)	Unambiguous	SGGKIEVIAHNELSGR		1	ACRE_091090	ACRE_091090	1	4	0.3542	0	1	1	417.478	1666.89	1666.89	0.99	0.00041	CID (Collision Induced Dissociation)	MS2	28.8362	150	56.11	10253	CCAB-4a3-2.raw	F601	2.88	1
FALSE	High	Sequest HT (A2)	Unambiguous	FIINASQPANDKIFDVSAFEK		1	ACRE_091090	ACRE_091090	1	3	0.5401	0	1	1	785.405	2354.2	2354.2	-0.49	-0.00039	CID (Collision Induced Dissociation)	MS2	14.1399	150	48.3796	7211	CCAB-4a3.raw	F600	2.87	1
FALSE	High	Sequest HT (A2)	Unambiguous	IEVIAHNELSGR		1	ACRE_091090	ACRE_091090	0	2	0.6585	0	1	1	669.361	1337.71	1337.72	-2.11	-0.00141	CID (Collision Induced Dissociation)	MS2	58.3118	150	61.5466	13715	CCAB-2a3-2.raw	F587	2.87	1
FALSE	High	Sequest HT (A2)	Unambiguous	IEVIAHNELSGR		1	ACRE_091090	ACRE_091090	0	3	0.5854	0	1	1	446.577	1337.72	1337.72	0.53	0.00023	CID (Collision Induced Dissociation)	MS2	19.2638	150	54.0309	10366	WT-a.raw	F635	2.87	1
FALSE	High	Sequest HT (A2)	Unambiguous	IFDVSAFEK		1	ACRE_091090	ACRE_091090	0	2	0.486	0	1	1	528.275	1055.54	1055.54	0.99	0.00052	CID (Collision Induced Dissociation)	MS2	9.6044	28.803	42.5395	7531	CCAB-4a3-2.raw	F601	2.86	1
FALSE	High	Sequest HT (A2)	Unambiguous	SGGKIEVIAHNELSGR		1	ACRE_091090	ACRE_091090	1	3	0.4336	0	1	1	556.299	1666.88	1666.89	-1.93	-0.00108	CID (Collision Induced Dissociation)	MS2	55.7501	150	57.399	11807	CCAB-3a2-2.raw	F593	2.86	1
FALSE	High	Sequest HT (A2)	Unambiguous	SGGKIEVIAHNELSGR		1	ACRE_091090	ACRE_091090	1	3	0.4825	0	1	1	556.302	1666.89	1666.89	2.27	0.00126	CID (Collision Induced Dissociation)	MS2	35.2769	150	62.3139	11298	CCAB-3a3.raw	F594	2.86	1
FALSE	High	Sequest HT (A2)	Unambiguous	SGGKIEVIAHNELSGR		1	ACRE_091090	ACRE_091090	1	3	0.5474	0	1	1	556.301	1666.89	1666.89	0.29	0.00016	CID (Collision Induced Dissociation)	MS2	37.1346	46.92	50.3529	11929	CCAB-4a2-2.raw	F599	2.85	1
FALSE	High	Sequest HT (A2)	Selected	TNNLGDAVVIQQK		1	ACRE_091090	ACRE_091090	0	2	0.0491	0	1	1	700.38	1399.75	1399.75	-1.56	-0.00109	CID (Collision Induced Dissociation)	MS2	64.3668	150	36.6553	4520	CCAB-4a3.raw	F600	2.85	1
FALSE	High	Sequest HT (A2)	Unambiguous	FYNVVNDEADEDED		1	ACRE_091090	ACRE_091090	0	2	0.8	0	1	1	837.325	1673.64	1673.64	-1	-0.00084	CID (Collision Induced Dissociation)	MS2	52.678	150	38.7166	7198	CCAB-3a2-2.raw	F593	2.85	1
FALSE	High	Sequest HT (A2)	Unambiguous	FIINASQPANDKIFDVSAFEK		1	ACRE_091090	ACRE_091090	1	3	0.4246	0	1	1	785.404	2354.2	2354.2	-2.05	-0.00161	CID (Collision Induced Dissociation)	MS2	14.9237	150	52.2264	12377	CCAB-4a2-2.raw	F599	2.85	1
FALSE	High	Sequest HT (A2)	Unambiguous	SGGKIEVIAHNELSGR		1	ACRE_091090	ACRE_091090	1	4	0.4035	0	1	1	417.478	1666.89	1666.89	2.33	0.00097	CID (Collision Induced Dissociation)	MS2	29.3673	150	56.9592	10427	CCAB-4a3-2.raw	F601	2.85	1
FALSE	High	Sequest HT (A2)	Unambiguous	TNNLGDAVVIQQK		1	ACRE_091090	ACRE_091090	0	2	0.4737	0	1	1	700.381	1399.75	1399.75	0.03	2e-05	CID (Collision Induced Dissociation)	MS2	74.1569	150	63.2035	14027	CCAB-2a3-2.raw	F587	2.85	1
FALSE	High	Sequest HT (A2)	Unambiguous	SGGKIEVIAHNELSGR		1	ACRE_091090	ACRE_091090	1	3	0.3838	0	1	1	556.3	1666.88	1666.89	-1.76	-0.00098	CID (Collision Induced Dissociation)	MS2	51.9653	150	62.0905	13818	CCAB-2a3-2.raw	F587	2.84	1
FALSE	High	Sequest HT (A2)	Unambiguous	FIINASQPANDKIFDVSAFEK		1	ACRE_091090	ACRE_091090	1	3	0.4014	0	1	1	785.404	2354.2	2354.2	-2.24	-0.00176	CID (Collision Induced Dissociation)	MS2	55.5593	150	44.9947	9019	WT-a.raw	F635	2.84	1
FALSE	High	Sequest HT (A2)	Unambiguous	TNNLGDAVVIQQK		1	ACRE_091090	ACRE_091090	0	2	0.3627	0	1	1	700.382	1399.76	1399.75	2.59	0.00181	CID (Collision Induced Dissociation)	MS2	10.5401	150	61.8656	11301	CCAB-4a3-2.raw	F601	2.84	1
FALSE	High	Sequest HT (A2)	Unambiguous	TNNLGDAVVIQQK		1	ACRE_091090	ACRE_091090	0	2	0.4894	0	1	1	700.38	1399.75	1399.75	-1.44	-0.00101	CID (Collision Induced Dissociation)	MS2	59.9483	150	58.572	13788	CCAB-4a2-2.raw	F599	2.84	1
FALSE	High	Sequest HT (A2)	Unambiguous	SGGKIEVIAHNELSGR		1	ACRE_091090	ACRE_091090	1	3	0.5265	0	1	1	556.3	1666.89	1666.89	-1.16	-0.00065	CID (Collision Induced Dissociation)	MS2	87.0752	150	65.0561	14335	CCAB-2a3-2.raw	F587	2.83	1
FALSE	High	Sequest HT (A2)	Unambiguous	SGGKIEVIAHNELSGR		1	ACRE_091090	ACRE_091090	1	3	0.4558	0	1	1	556.301	1666.89	1666.89	0.3	0.00017	CID (Collision Induced Dissociation)	MS2	39.4344	150	63.0556	14738	CCAB-4a2-2.raw	F599	2.83	1
FALSE	High	Sequest HT (A2)	Unambiguous	SGGKIEVIAHNELSGR		1	ACRE_091090	ACRE_091090	1	2	0.4876	0	1	1	833.946	1666.89	1666.89	-1.25	-0.00104	CID (Collision Induced Dissociation)	MS2	18.0255	150	47.0271	10142	CCAB-3a3-2.raw	F595	2.83	1
FALSE	High	Sequest HT (A2)	Unambiguous	SGGKIEVIAHNELSGR		1	ACRE_091090	ACRE_091090	1	4	0.4858	0	1	1	417.477	1666.89	1666.89	-0.48	-0.0002	CID (Collision Induced Dissociation)	MS2	26.9968	150	59.0862	10819	CCAB-3a3.raw	F594	2.82	1
FALSE	High	Sequest HT (A2)	Unambiguous	FYNVVNDEADEDED		1	ACRE_091090	ACRE_091090	0	2	0.8333	0	1	1	837.331	1673.66	1673.64	6.23	0.00521	CID (Collision Induced Dissociation)	MS2	78.4768	41.254	38.3814	7444	CCAB-2a3-2.raw	F587	2.82	1
FALSE	High	Sequest HT (A2)	Unambiguous	TNNLGDAVVIQQK		1	ACRE_091090	ACRE_091090	0	2	0.539	0	1	1	700.38	1399.75	1399.75	-0.23	-0.00016	CID (Collision Induced Dissociation)	MS2	28.678	150	62.1412	12799	CCAB-3a2-2.raw	F593	2.82	1
FALSE	High	Sequest HT (A2)	Unambiguous	SGGKIEVIAHNELSGR		1	ACRE_091090	ACRE_091090	1	3	0.5355	0	1	1	556.3	1666.88	1666.89	-1.77	-0.00098	CID (Collision Induced Dissociation)	MS2	77.6946	150	55.5486	11388	CCAB-3a2-2.raw	F593	2.82	1
FALSE	High	Sequest HT (A2)	Unambiguous	IEVIAHNELSGR		1	ACRE_091090	ACRE_091090	0	2	0.4574	0	1	1	669.362	1337.72	1337.72	-0.58	-0.00038	CID (Collision Induced Dissociation)	MS2	33.1096	44.294	37.2151	6902	CCAB-3a3-2.raw	F595	2.82	1
FALSE	High	Sequest HT (A2)	Unambiguous	IEVIAHNELSGR		1	ACRE_091090	ACRE_091090	0	2	0.4021	0	1	1	669.365	1337.72	1337.72	4.19	0.00281	CID (Collision Induced Dissociation)	MS2	70.6313	150	40.1541	6897	CCAB-4a3-2.raw	F601	2.81	1
FALSE	High	Sequest HT (A2)	Unambiguous	SGGKIEVIAHNELSGR		1	ACRE_091090	ACRE_091090	1	3	0.4591	0	1	1	556.3	1666.88	1666.89	-1.74	-0.00097	CID (Collision Induced Dissociation)	MS2	76.9728	150	57.8098	11897	CCAB-3a2-2.raw	F593	2.81	1
FALSE	High	Sequest HT (A2)	Unambiguous	IEVIAHNELSGR		1	ACRE_091090	ACRE_091090	0	2	0.5836	0	1	1	669.362	1337.72	1337.72	-0.78	-0.00052	CID (Collision Induced Dissociation)	MS2	73.2935	150	50.6293	9301	CCAB-4a2.raw	F598	2.81	1
FALSE	High	Sequest HT (A2)	Unambiguous	SGGKIEVIAHNELSGR		1	ACRE_091090	ACRE_091090	1	3	0.4571	0	1	1	556.305	1666.9	1666.89	7.63	0.00424	CID (Collision Induced Dissociation)	MS2	83.7519	150	56.4458	9563	CCAB-4a1.raw	F596	2.8	1
FALSE	High	Sequest HT (A2)	Unambiguous	FYNVVNDEADEDED		1	ACRE_091090	ACRE_091090	0	2	0.6857	0	1	1	837.325	1673.64	1673.64	-1.64	-0.00137	CID (Collision Induced Dissociation)	MS2	79.0691	144.784	40.9392	8225	CCAB-3a3-2.raw	F595	2.8	1
FALSE	High	Sequest HT (A2)	Unambiguous	TNNLGDAVVIQQK		1	ACRE_091090	ACRE_091090	0	2	0.3571	0	1	1	700.381	1399.76	1399.75	0.78	0.00055	CID (Collision Induced Dissociation)	MS2	79.2203	150	30.5889	5499	WT-a.raw	F635	2.8	1
FALSE	High	Sequest HT (A2)	Unambiguous	TNNLGDAVVIQQK		1	ACRE_091090	ACRE_091090	0	2	0.4516	0	1	1	700.379	1399.75	1399.75	-1.85	-0.00129	CID (Collision Induced Dissociation)	MS2	57.89	150	48.2546	8862	CCAB-4a3-2.raw	F601	2.79	1
FALSE	High	Sequest HT (A2)	Unambiguous	SGGKIEVIAHNELSGR		1	ACRE_091090	ACRE_091090	1	3	0.491	0	1	1	556.303	1666.9	1666.89	4.81	0.00267	CID (Collision Induced Dissociation)	MS2	81.9692	150	62.7293	14673	CCAB-4a2-2.raw	F599	2.79	1
FALSE	High	Sequest HT (A2)	Unambiguous	TNNLGDAVVIQQK		1	ACRE_091090	ACRE_091090	0	2	0.4892	0	1	1	700.381	1399.75	1399.75	0.6	0.00042	CID (Collision Induced Dissociation)	MS2	51.9278	150	44.7239	8067	CCAB-4a3-2.raw	F601	2.78	1
FALSE	High	Sequest HT (A2)	Unambiguous	SGGKIEVIAHNELSGR		1	ACRE_091090	ACRE_091090	1	3	0.4029	0	1	1	556.301	1666.89	1666.89	0.54	0.0003	CID (Collision Induced Dissociation)	MS2	63.9877	150	62.4923	11319	CCAB-3a3.raw	F594	2.78	1
FALSE	High	Sequest HT (A2)	Unambiguous	SGGKIEVIAHNELSGR		1	ACRE_091090	ACRE_091090	1	3	0.518	0	1	1	556.3	1666.89	1666.89	-0.29	-0.00016	CID (Collision Induced Dissociation)	MS2	83.3383	150	58.4393	15807	CCAB-2b-2.raw	F589	2.78	1
FALSE	High	Sequest HT (A2)	Unambiguous	SGGKIEVIAHNELSGR		1	ACRE_091090	ACRE_091090	1	3	0.5036	0	1	1	556.299	1666.88	1666.89	-2.72	-0.00151	CID (Collision Induced Dissociation)	MS2	48.2749	150	57.616	10202	CCAB-3a2.raw	F592	2.78	1
FALSE	High	Sequest HT (A2)	Unambiguous	IEVIAHNELSGR		1	ACRE_091090	ACRE_091090	0	2	0.5162	0	1	1	669.365	1337.72	1337.72	3.64	0.00244	CID (Collision Induced Dissociation)	MS2	78.2257	62.616	36.0639	6877	CCAB-4a2-2.raw	F599	2.77	1
FALSE	High	Sequest HT (A2)	Unambiguous	TNNLGDAVVIQQK		1	ACRE_091090	ACRE_091090	0	2	0.509	0	1	1	700.385	1399.76	1399.75	5.69	0.00398	CID (Collision Induced Dissociation)	MS2	63.8278	150	52.5053	9698	CCAB-4a2.raw	F598	2.77	1
FALSE	High	Sequest HT (A2)	Unambiguous	SGGKIEVIAHNELSGR		1	ACRE_091090	ACRE_091090	1	3	0.5199	0	1	1	556.301	1666.89	1666.89	-0.08	-5e-05	CID (Collision Induced Dissociation)	MS2	46.9101	150	44.0122	7650	CCAB-4a2.raw	F598	2.77	1
FALSE	High	Sequest HT (A2)	Unambiguous	IEVIAHNELSGR		1	ACRE_091090	ACRE_091090	0	3	0.6029	0	1	1	446.578	1337.72	1337.72	1.37	0.00061	CID (Collision Induced Dissociation)	MS2	21.1654	37.505	35.088	5134	CCAB-3a3.raw	F594	2.77	1
FALSE	High	Sequest HT (A2)	Unambiguous	SGGKIEVIAHNELSGR		1	ACRE_091090	ACRE_091090	1	3	0.4838	0	1	1	556.3	1666.89	1666.89	-1.26	-0.0007	CID (Collision Induced Dissociation)	MS2	19.7018	150	59.4236	10896	CCAB-4a3-2.raw	F601	2.77	1
FALSE	High	Sequest HT (A2)	Unambiguous	IEVIAHNELSGR		1	ACRE_091090	ACRE_091090	0	2	0.5704	0	1	1	669.36	1337.71	1337.72	-3.32	-0.00222	CID (Collision Induced Dissociation)	MS2	49.272	150	33.451	4389	CCAB-4a1.raw	F596	2.77	1
FALSE	High	Sequest HT (A2)	Unambiguous	SGGKIEVIAHNELSGR		1	ACRE_091090	ACRE_091090	1	2	0.6087	0	1	1	833.946	1666.88	1666.89	-1.4	-0.00117	CID (Collision Induced Dissociation)	MS2	66.759	150	55.0611	9975	CCAB-3a3.raw	F594	2.76	1
FALSE	High	Sequest HT (A2)	Unambiguous	FIINASQPANDKIFDVSAFEK		1	ACRE_091090	ACRE_091090	1	3	0.3514	0	1	1	785.406	2354.2	2354.2	-0.01	-1e-05	CID (Collision Induced Dissociation)	MS2	52.2997	150	57.2867	12795	CCAB-2a3-2.raw	F587	2.76	1
FALSE	High	Sequest HT (A2)	Unambiguous	IEVIAHNELSGR		1	ACRE_091090	ACRE_091090	0	3	0.529	0	1	1	446.578	1337.72	1337.72	0.93	0.00042	CID (Collision Induced Dissociation)	MS2	65.2807	150	34.1773	4580	CCAB-4a1.raw	F596	2.76	1
FALSE	High	Sequest HT (A2)	Unambiguous	SGGKIEVIAHNELSGR		1	ACRE_091090	ACRE_091090	1	3	0.3623	0	1	1	556.3	1666.89	1666.89	-0.52	-0.00029	CID (Collision Induced Dissociation)	MS2	46.925	150	58.4089	10352	CCAB-3a2.raw	F592	2.76	1
FALSE	High	Sequest HT (A2)	Unambiguous	TNNLGDAVVIQQK		1	ACRE_091090	ACRE_091090	0	2	0.4783	0	1	1	700.38	1399.75	1399.75	-1.1	-0.00077	CID (Collision Induced Dissociation)	MS2	39.8881	150	43.6454	7810	CCAB-4a3-2.raw	F601	2.76	1
FALSE	High	Sequest HT (A2)	Unambiguous	SGGKIEVIAHNELSGR		1	ACRE_091090	ACRE_091090	1	3	0.5072	0	1	1	556.3	1666.88	1666.89	-1.49	-0.00083	CID (Collision Induced Dissociation)	MS2	58.1499	150	56.8342	10038	CCAB-3a2.raw	F592	2.76	1
FALSE	High	Sequest HT (A2)	Unambiguous	IEVIAHNELSGR		1	ACRE_091090	ACRE_091090	0	2	0.4601	0	1	1	669.363	1337.72	1337.72	1.2	0.0008	CID (Collision Induced Dissociation)	MS2	76.406	125.894	36.6902	5869	CCAB-4a3-2.raw	F601	2.76	1
FALSE	High	Sequest HT (A2)	Unambiguous	FYNVVNDEADEDED		1	ACRE_091090	ACRE_091090	0	2	0.8225	0	1	1	837.324	1673.64	1673.64	-2.37	-0.00198	CID (Collision Induced Dissociation)	MS2	60.1401	82.105	38.5255	7494	CCAB-2a3-2.raw	F587	2.76	1
FALSE	High	Sequest HT (A2)	Unambiguous	KFIINASQPANDK		1	ACRE_091090	ACRE_091090	1	2	0.413	0	1	1	723.391	1445.77	1445.77	-0.36	-0.00026	CID (Collision Induced Dissociation)	MS2	39.0664	53.329	33.3158	5460	CCAB-3a3-2.raw	F595	2.76	1
FALSE	High	Sequest HT (A2)	Unambiguous	SGGKIEVIAHNELSGR		1	ACRE_091090	ACRE_091090	1	3	0.3709	0	1	1	556.301	1666.89	1666.89	0.45	0.00025	CID (Collision Induced Dissociation)	MS2	66.2652	150	61.18	14357	CCAB-4a2-2.raw	F599	2.75	1
FALSE	High	Sequest HT (A2)	Unambiguous	IEVIAHNELSGR		1	ACRE_091090	ACRE_091090	0	2	0.6036	0	1	1	669.361	1337.72	1337.72	-1.13	-0.00075	CID (Collision Induced Dissociation)	MS2	35.6216	150	61.323	13669	CCAB-2a3-2.raw	F587	2.75	1
FALSE	High	Sequest HT (A2)	Unambiguous	SGGKIEVIAHNELSGR		1	ACRE_091090	ACRE_091090	1	3	0.5018	0	1	1	556.301	1666.89	1666.89	0.42	0.00024	CID (Collision Induced Dissociation)	MS2	79.7092	108.653	55.493	15108	CCAB-2b-2.raw	F589	2.75	1
FALSE	High	Sequest HT (A2)	Unambiguous	SGGKIEVIAHNELSGR		1	ACRE_091090	ACRE_091090	1	3	0.3491	0	1	1	556.301	1666.89	1666.89	0.26	0.00014	CID (Collision Induced Dissociation)	MS2	84.2051	150	43.7467	8731	WT-a.raw	F635	2.75	1
FALSE	High	Sequest HT (A2)	Unambiguous	IEVIAHNELSGR		1	ACRE_091090	ACRE_091090	0	2	0.5091	0	1	1	669.362	1337.72	1337.72	0	0	CID (Collision Induced Dissociation)	MS2	56.9022	150	57.3907	12818	CCAB-2a3-2.raw	F587	2.75	1
FALSE	High	Sequest HT (A2)	Unambiguous	SGGKIEVIAHNELSGR		1	ACRE_091090	ACRE_091090	1	3	0.3782	0	1	1	556.301	1666.89	1666.89	1.14	0.00063	CID (Collision Induced Dissociation)	MS2	57.696	150	46.7867	8535	CCAB-4a3-2.raw	F601	2.75	1
FALSE	High	Sequest HT (A2)	Unambiguous	TNNLGDAVVIQQK		1	ACRE_091090	ACRE_091090	0	2	0.4109	0	1	1	700.38	1399.75	1399.75	-0.22	-0.00016	CID (Collision Induced Dissociation)	MS2	0	150	52.7681	9696	CCAB-4a3-2.raw	F601	2.75	1
FALSE	High	Sequest HT (A2)	Unambiguous	TNNLGDAVVIQQK		1	ACRE_091090	ACRE_091090	0	2	0.1423	0	1	1	700.372	1399.74	1399.75	-12.99	-0.00909	CID (Collision Induced Dissociation)	MS2	56.6954	20.765	36.245	5732	CCAB-4a3-2.raw	F601	2.74	1
FALSE	High	Sequest HT (A2)	Unambiguous	SGGKIEVIAHNELSGR		1	ACRE_091090	ACRE_091090	1	3	0.4343	0	1	1	556.3	1666.89	1666.89	-0.91	-0.00051	CID (Collision Induced Dissociation)	MS2	35.0154	150	58.9973	8970	CCAB-4a3.raw	F600	2.74	1
FALSE	High	Sequest HT (A2)	Unambiguous	TNNLGDAVVIQQK		1	ACRE_091090	ACRE_091090	0	2	0.3905	0	1	1	700.383	1399.76	1399.75	3.52	0.00246	CID (Collision Induced Dissociation)	MS2	56.9924	150	63.2614	14039	CCAB-2a3-2.raw	F587	2.74	1
FALSE	High	Sequest HT (A2)	Unambiguous	IEVIAHNELSGR		1	ACRE_091090	ACRE_091090	0	2	0.4615	0	1	1	669.363	1337.72	1337.72	1.61	0.00108	CID (Collision Induced Dissociation)	MS2	69.2437	150	46.9835	10131	CCAB-3a3-2.raw	F595	2.73	1
FALSE	High	Sequest HT (A2)	Unambiguous	SGGKIEVIAHNELSGR		1	ACRE_091090	ACRE_091090	1	3	0.4469	0	1	1	556.301	1666.89	1666.89	0.58	0.00032	CID (Collision Induced Dissociation)	MS2	52.1816	150	55.2639	9352	CCAB-4a1.raw	F596	2.73	1
FALSE	High	Sequest HT (A2)	Unambiguous	FIINASQPANDKIFDVSAFEK		1	ACRE_091090	ACRE_091090	1	3	0.3077	0	1	1	785.405	2354.2	2354.2	-1.5	-0.00118	CID (Collision Induced Dissociation)	MS2	18.5375	150	57.3999	13524	CCAB-4a2-2.raw	F599	2.73	1
FALSE	High	Sequest HT (A2)	Unambiguous	SGGKIEVIAHNELSGR		1	ACRE_091090	ACRE_091090	1	2	0.2051	0	1	1	833.946	1666.89	1666.89	-1.08	-0.0009	CID (Collision Induced Dissociation)	MS2	73.0981	150	55.7099	11157	CCAB-4a1-2.raw	F597	2.73	1
FALSE	High	Sequest HT (A2)	Unambiguous	IEVIAHNELSGR		1	ACRE_091090	ACRE_091090	0	2	0.5074	0	1	1	669.363	1337.72	1337.72	0.73	0.00049	CID (Collision Induced Dissociation)	MS2	78.4568	150	37.457	6095	CCAB-4a3-2.raw	F601	2.72	1
FALSE	High	Sequest HT (A2)	Unambiguous	SGGKIEVIAHNELSGR		1	ACRE_091090	ACRE_091090	1	3	0.4265	0	1	1	556.3	1666.88	1666.89	-1.32	-0.00073	CID (Collision Induced Dissociation)	MS2	84.4584	150	61.3713	12360	CCAB-4a1-2.raw	F597	2.72	1
FALSE	High	Sequest HT (A2)	Unambiguous	SGGKIEVIAHNELSGR		1	ACRE_091090	ACRE_091090	1	3	0.2684	0	1	1	556.303	1666.89	1666.89	3.5	0.00194	CID (Collision Induced Dissociation)	MS2	90.1877	150	47.5438	7849	CCAB-1a.raw	F578	2.72	1
FALSE	High	Sequest HT (A2)	Unambiguous	IEVIAHNELSGR		1	ACRE_091090	ACRE_091090	0	2	0.6213	0	1	1	669.363	1337.72	1337.72	0.43	0.00028	CID (Collision Induced Dissociation)	MS2	53.6677	150	59.6989	10935	CCAB-3a3.raw	F594	2.72	1
FALSE	High	Sequest HT (A2)	Unambiguous	TNNLGDAVVIQQK		1	ACRE_091090	ACRE_091090	0	2	0.2768	0	1	1	700.382	1399.76	1399.75	1.29	0.0009	CID (Collision Induced Dissociation)	MS2	60.5973	150	59.5889	10925	CCAB-4a3-2.raw	F601	2.71	1
FALSE	High	Sequest HT (A2)	Unambiguous	TNNLGDAVVIQQK		1	ACRE_091090	ACRE_091090	0	2	0.5535	0	1	1	700.381	1399.75	1399.75	0.24	0.00017	CID (Collision Induced Dissociation)	MS2	71.3671	150	66.3302	14368	CCAB-3a3-2.raw	F595	2.71	1
FALSE	High	Sequest HT (A2)	Unambiguous	FIINASQPANDKIFDVSAFEK		1	ACRE_091090	ACRE_091090	1	3	0.476	0	1	1	785.409	2354.21	2354.2	3.91	0.00307	CID (Collision Induced Dissociation)	MS2	51.8684	150	48.7044	8962	CCAB-4a3-2.raw	F601	2.71	1
FALSE	High	Sequest HT (A2)	Unambiguous	TNNLGDAVVIQQK		1	ACRE_091090	ACRE_091090	0	2	0.5572	0	1	1	700.379	1399.75	1399.75	-1.93	-0.00135	CID (Collision Induced Dissociation)	MS2	72.9562	150	60.8782	13577	CCAB-2a3-2.raw	F587	2.71	1
FALSE	High	Sequest HT (A2)	Unambiguous	IEVIAHNELSGR		1	ACRE_091090	ACRE_091090	0	2	0.4539	0	1	1	669.363	1337.72	1337.72	0.51	0.00034	CID (Collision Induced Dissociation)	MS2	33.5231	150	60.7042	13354	CCAB-3a3-2.raw	F595	2.71	1
FALSE	High	Sequest HT (A2)	Unambiguous	KFIINASQPANDKIFDVSAFEK		1	ACRE_091090	ACRE_091090	2	3	0.4074	0	1	1	828.105	2482.3	2482.3	1.16	0.00096	CID (Collision Induced Dissociation)	MS2	39.1566	150	47.7442	7894	CCAB-1a.raw	F578	2.7	1
FALSE	High	Sequest HT (A2)	Unambiguous	FIINASQPANDKIFDVSAFEK		1	ACRE_091090	ACRE_091090	1	3	0.4407	0	1	1	785.406	2354.2	2354.2	-0.26	-0.00021	CID (Collision Induced Dissociation)	MS2	50.5863	150	54.8043	12931	CCAB-4a2-2.raw	F599	2.7	1
FALSE	High	Sequest HT (A2)	Unambiguous	IEVIAHNELSGR		1	ACRE_091090	ACRE_091090	0	2	0.6333	0	1	1	669.362	1337.72	1337.72	-0.77	-0.00051	CID (Collision Induced Dissociation)	MS2	30.3891	150	60.4004	13288	CCAB-3a3-2.raw	F595	2.7	1
FALSE	High	Sequest HT (A2)	Unambiguous	SGGKIEVIAHNELSGR		1	ACRE_091090	ACRE_091090	1	3	0.5279	0	1	1	556.3	1666.89	1666.89	-0.83	-0.00046	CID (Collision Induced Dissociation)	MS2	85.0362	150	58.508	9905	CCAB-4a1.raw	F596	2.69	1
FALSE	High	Sequest HT (A2)	Unambiguous	TNNLGDAVVIQQK		1	ACRE_091090	ACRE_091090	0	2	0.5167	0	1	1	700.381	1399.75	1399.75	0.62	0.00044	CID (Collision Induced Dissociation)	MS2	12.1553	150	51.9845	9409	CCAB-3a3.raw	F594	2.69	1
FALSE	High	Sequest HT (A2)	Unambiguous	FIINASQPANDKIFDVSAFEK		1	ACRE_091090	ACRE_091090	1	3	0.461	0	1	1	785.406	2354.2	2354.2	0.91	0.00071	CID (Collision Induced Dissociation)	MS2	64.6969	150	53.9806	10353	WT-a.raw	F635	2.69	1
FALSE	High	Sequest HT (A2)	Unambiguous	SGGKIEVIAHNELSGR		1	ACRE_091090	ACRE_091090	1	3	0.3829	0	1	1	556.3	1666.89	1666.89	-0.68	-0.00038	CID (Collision Induced Dissociation)	MS2	51.0658	150	64.6124	14095	CCAB-3a3-2.raw	F595	2.69	1
FALSE	High	Sequest HT (A2)	Unambiguous	SGGKIEVIAHNELSGR		1	ACRE_091090	ACRE_091090	1	3	0.3011	0	1	1	556.301	1666.89	1666.89	0.67	0.00037	CID (Collision Induced Dissociation)	MS2	31.3835	150	66.226	14513	CCAB-2a3-2.raw	F587	2.69	1
FALSE	High	Sequest HT (A2)	Unambiguous	FIINASQPANDKIFDVSAFEK		1	ACRE_091090	ACRE_091090	1	3	0.403	0	1	1	785.404	2354.2	2354.2	-2	-0.00157	CID (Collision Induced Dissociation)	MS2	58.8237	150	51.1199	9412	CCAB-4a2.raw	F598	2.68	1
FALSE	High	Sequest HT (A2)	Unambiguous	SGGKIEVIAHNELSGR		1	ACRE_091090	ACRE_091090	1	3	0.4963	0	1	1	556.301	1666.89	1666.89	0.79	0.00044	CID (Collision Induced Dissociation)	MS2	50.268	150	44.7	6418	CCAB-4a3.raw	F600	2.68	1
FALSE	High	Sequest HT (A2)	Unambiguous	IFDVSAFEK		1	ACRE_091090	ACRE_091090	0	2	0.4328	0	1	1	528.274	1055.54	1055.54	-0.54	-0.00029	CID (Collision Induced Dissociation)	MS2	31.7503	26.936	42.5075	9324	CCAB-4a2-2.raw	F599	2.68	1
FALSE	High	Sequest HT (A2)	Unambiguous	SGGKIEVIAHNELSGR		1	ACRE_091090	ACRE_091090	1	3	0.2873	0	1	1	556.301	1666.89	1666.89	0.1	6e-05	CID (Collision Induced Dissociation)	MS2	74.8845	150	56.0292	13601	CCAB-2b.raw	F588	2.68	1
FALSE	High	Sequest HT (A2)	Unambiguous	SGGKIEVIAHNELSGR		1	ACRE_091090	ACRE_091090	1	3	0.4457	0	1	1	556.3	1666.89	1666.89	-0.2	-0.00011	CID (Collision Induced Dissociation)	MS2	84.6877	150	50.0441	8464	CCAB-4a1.raw	F596	2.67	1
FALSE	High	Sequest HT (A2)	Unambiguous	IEVIAHNELSGR		1	ACRE_091090	ACRE_091090	0	2	0.5768	0	1	1	669.367	1337.73	1337.72	7.47	0.00499	CID (Collision Induced Dissociation)	MS2	69.8846	121.108	33.369	4656	CCAB-3a3.raw	F594	2.67	1
FALSE	High	Sequest HT (A2)	Unambiguous	SGGKIEVIAHNELSGR		1	ACRE_091090	ACRE_091090	1	3	0.3408	0	1	1	556.3	1666.88	1666.89	-1.78	-0.00099	CID (Collision Induced Dissociation)	MS2	52.8117	150	51.6237	9520	CCAB-4a2.raw	F598	2.67	1
FALSE	High	Sequest HT (A2)	Unambiguous	IFDVSAFEK		1	ACRE_091090	ACRE_091090	0	2	0.5693	0	1	1	528.274	1055.54	1055.54	0.27	0.00014	CID (Collision Induced Dissociation)	MS2	6.64218	3.876	42.6593	8970	CCAB-2a3-2.raw	F587	2.67	1
FALSE	High	Sequest HT (A2)	Unambiguous	TNNLGDAVVIQQK		1	ACRE_091090	ACRE_091090	0	2	0.5564	0	1	1	700.381	1399.75	1399.75	0.13	9e-05	CID (Collision Induced Dissociation)	MS2	77.4569	150	59.5146	10902	CCAB-3a3.raw	F594	2.66	1
FALSE	High	Sequest HT (A2)	Unambiguous	IEVIAHNELSGR		1	ACRE_091090	ACRE_091090	0	2	0.5451	0	1	1	669.361	1337.71	1337.72	-2.07	-0.00138	CID (Collision Induced Dissociation)	MS2	36.1635	150	50.8355	9166	CCAB-3a3.raw	F594	2.66	1
FALSE	High	Sequest HT (A2)	Unambiguous	FIINASQPANDKIFDVSAFEK		1	ACRE_091090	ACRE_091090	1	3	0.2717	0	1	1	785.409	2354.21	2354.2	4.48	0.00352	CID (Collision Induced Dissociation)	MS2	43.9632	150	58.0147	10716	CCAB-4a2.raw	F598	2.65	1
FALSE	High	Sequest HT (A2)	Unambiguous	IEVIAHNELSGR		1	ACRE_091090	ACRE_091090	0	2	0.4755	0	1	1	669.366	1337.72	1337.72	5	0.00334	CID (Collision Induced Dissociation)	MS2	67.473	150	36.0815	5416	CCAB-3a3.raw	F594	2.65	1
FALSE	High	Sequest HT (A2)	Unambiguous	FIINASQPANDKIFDVSAFEK		1	ACRE_091090	ACRE_091090	1	3	0.3434	0	1	1	785.407	2354.21	2354.2	1.96	0.00154	CID (Collision Induced Dissociation)	MS2	66.2675	150	52.1869	9635	CCAB-4a2.raw	F598	2.65	1
FALSE	High	Sequest HT (A2)	Unambiguous	KFIINASQPANDK		1	ACRE_091090	ACRE_091090	1	3	0.083	0	1	1	482.596	1445.77	1445.77	-0.17	-8e-05	CID (Collision Induced Dissociation)	MS2	42.6762	105.708	32.48	4407	CCAB-3a3.raw	F594	2.65	1
FALSE	High	Sequest HT (A2)	Unambiguous	SGGKIEVIAHNELSGR		1	ACRE_091090	ACRE_091090	1	3	0.4528	0	1	1	556.301	1666.89	1666.89	0.17	9e-05	CID (Collision Induced Dissociation)	MS2	71.0164	150	55.9265	12997	CCAB-3a1-2.raw	F591	2.65	1
FALSE	High	Sequest HT (A2)	Unambiguous	FIINASQPANDKIFDVSAFEK		1	ACRE_091090	ACRE_091090	1	3	0.483	0	1	1	785.415	2354.23	2354.2	11.47	0.009	CID (Collision Induced Dissociation)	MS2	51.4249	150	50.5466	9282	CCAB-4a2.raw	F598	2.65	1
FALSE	High	Sequest HT (A2)	Unambiguous	TNNLGDAVVIQQK		1	ACRE_091090	ACRE_091090	0	2	0.4735	0	1	1	700.381	1399.75	1399.75	0.61	0.00042	CID (Collision Induced Dissociation)	MS2	32.3293	150	62.6833	14664	CCAB-4a2-2.raw	F599	2.64	1
FALSE	High	Sequest HT (A2)	Unambiguous	IEVIAHNELSGR		1	ACRE_091090	ACRE_091090	0	2	0.4508	0	1	1	669.36	1337.71	1337.72	-2.85	-0.00191	CID (Collision Induced Dissociation)	MS2	65.8461	150	57.7403	12712	CCAB-3a3-2.raw	F595	2.64	1
FALSE	High	Sequest HT (A2)	Unambiguous	SGGKIEVIAHNELSGR		1	ACRE_091090	ACRE_091090	1	3	0.447	0	1	1	556.3	1666.88	1666.89	-1.34	-0.00075	CID (Collision Induced Dissociation)	MS2	57.6306	150	43.8937	6235	CCAB-4a3.raw	F600	2.64	1
FALSE	High	Sequest HT (A2)	Unambiguous	SGGKIEVIAHNELSGR		1	ACRE_091090	ACRE_091090	1	2	0.5871	0	1	1	833.948	1666.89	1666.89	1.04	0.00087	CID (Collision Induced Dissociation)	MS2	52.6054	150	54.7929	12045	CCAB-3a3-2.raw	F595	2.64	1
FALSE	High	Sequest HT (A2)	Unambiguous	IEVIAHNELSGR		1	ACRE_091090	ACRE_091090	0	3	0.5114	0	1	1	446.577	1337.72	1337.72	-0.76	-0.00034	CID (Collision Induced Dissociation)	MS2	74.0297	30.014	36.5011	7044	CCAB-4a2-2.raw	F599	2.64	1
FALSE	High	Sequest HT (A2)	Unambiguous	TNNLGDAVVIQQK		1	ACRE_091090	ACRE_091090	0	2	0.5265	0	1	1	700.38	1399.75	1399.75	-0.23	-0.00016	CID (Collision Induced Dissociation)	MS2	42.8032	150	61.8012	13578	CCAB-3a3-2.raw	F595	2.64	1
FALSE	High	Sequest HT (A2)	Unambiguous	SGGKIEVIAHNELSGR		1	ACRE_091090	ACRE_091090	1	3	0.4981	0	1	1	556.311	1666.92	1666.89	17.94	0.00997	CID (Collision Induced Dissociation)	MS2	49.061	33.148	43.8493	9786	CCAB-4a2-2.raw	F599	2.63	1
FALSE	High	Sequest HT (A2)	Unambiguous	KFIINASQPANDK		1	ACRE_091090	ACRE_091090	1	3	0.308	0	1	1	482.597	1445.78	1445.77	0.64	0.00031	CID (Collision Induced Dissociation)	MS2	17.2791	12.684	32.7701	4549	CCAB-4a2.raw	F598	2.63	1
FALSE	High	Sequest HT (A2)	Unambiguous	SGGKIEVIAHNELSGR		1	ACRE_091090	ACRE_091090	1	3	0.5305	0	1	1	556.3	1666.88	1666.89	-1.86	-0.00104	CID (Collision Induced Dissociation)	MS2	52.0388	150	65.8925	14302	CCAB-3a3-2.raw	F595	2.62	1
FALSE	High	Sequest HT (A2)	Unambiguous	FIINASQPANDKIFDVSAFEK		1	ACRE_091090	ACRE_091090	1	3	0.3702	0	1	1	785.404	2354.2	2354.2	-1.61	-0.00127	CID (Collision Induced Dissociation)	MS2	41.2356	150	45.8603	7469	CCAB-1a.raw	F578	2.62	1
FALSE	High	Sequest HT (A2)	Unambiguous	IEVIAHNELSGR		1	ACRE_091090	ACRE_091090	0	2	0.5191	0	1	1	669.363	1337.72	1337.72	0.46	0.00031	CID (Collision Induced Dissociation)	MS2	64.3626	150	59.8137	13351	CCAB-2a3-2.raw	F587	2.62	1
FALSE	High	Sequest HT (A2)	Unambiguous	SGGKIEVIAHNELSGR		1	ACRE_091090	ACRE_091090	1	3	0.4313	0	1	1	556.303	1666.89	1666.89	4.51	0.0025	CID (Collision Induced Dissociation)	MS2	94.5959	150	55.9979	9857	CCAB-3a2.raw	F592	2.62	1
FALSE	High	Sequest HT (A2)	Unambiguous	IFDVSAFEK		1	ACRE_091090	ACRE_091090	0	2	0.4751	0	1	1	528.275	1055.54	1055.54	2.18	0.00115	CID (Collision Induced Dissociation)	MS2	12.6417	150	42.8227	5992	CCAB-4a3.raw	F600	2.61	1
FALSE	High	Sequest HT (A2)	Unambiguous	SGGKIEVIAHNELSGR		1	ACRE_091090	ACRE_091090	1	3	0.4483	0	1	1	556.302	1666.89	1666.89	1.81	0.00101	CID (Collision Induced Dissociation)	MS2	49.5353	150	58.7574	14204	CCAB-2b.raw	F588	2.61	1
FALSE	High	Sequest HT (A2)	Unambiguous	FIINASQPANDKIFDVSAFEK		1	ACRE_091090	ACRE_091090	1	3	0.433	0	1	1	785.407	2354.21	2354.2	1.78	0.0014	CID (Collision Induced Dissociation)	MS2	69.3659	150	50.9619	12094	CCAB-4a2-2.raw	F599	2.61	1
FALSE	High	Sequest HT (A2)	Unambiguous	IEVIAHNELSGR		1	ACRE_091090	ACRE_091090	0	2	0.5441	0	1	1	669.366	1337.72	1337.72	5.09	0.00341	CID (Collision Induced Dissociation)	MS2	63.4512	150	59.9251	13188	CCAB-3a3-2.raw	F595	2.61	1
FALSE	High	Sequest HT (A2)	Unambiguous	SGGKIEVIAHNELSGR		1	ACRE_091090	ACRE_091090	1	3	0.5019	0	1	1	556.301	1666.89	1666.89	0.14	8e-05	CID (Collision Induced Dissociation)	MS2	68.7783	150	59.7921	9062	CCAB-4a3.raw	F600	2.61	1
FALSE	High	Sequest HT (A2)	Unambiguous	SGGKIEVIAHNELSGR		1	ACRE_091090	ACRE_091090	1	3	0.3716	0	1	1	556.3	1666.89	1666.89	-0.65	-0.00036	CID (Collision Induced Dissociation)	MS2	73.8208	150	47.6126	8156	CCAB-3a2.raw	F592	2.61	1
FALSE	High	Sequest HT (A2)	Unambiguous	SGGKIEVIAHNELSGR		1	ACRE_091090	ACRE_091090	1	3	0.3985	0	1	1	556.301	1666.89	1666.89	0.38	0.00021	CID (Collision Induced Dissociation)	MS2	47.1858	150	57.1205	11745	CCAB-3a2-2.raw	F593	2.61	1
FALSE	High	Sequest HT (A2)	Unambiguous	FIINASQPANDKIFDVSAFEK		1	ACRE_091090	ACRE_091090	1	3	0.3908	0	1	1	785.407	2354.21	2354.2	1.47	0.00115	CID (Collision Induced Dissociation)	MS2	75.1559	150	50.6208	9299	CCAB-4a2.raw	F598	2.61	1
FALSE	High	Sequest HT (A2)	Unambiguous	FIINASQPANDKIFDVSAFEK		1	ACRE_091090	ACRE_091090	1	3	0.341	0	1	1	785.405	2354.2	2354.2	-0.4	-0.00032	CID (Collision Induced Dissociation)	MS2	27.328	150	53.1128	12569	CCAB-4a2-2.raw	F599	2.61	1
FALSE	High	Sequest HT (A2)	Unambiguous	SGGKIEVIAHNELSGR		1	ACRE_091090	ACRE_091090	1	3	0.2835	0	1	1	556.299	1666.88	1666.89	-2.14	-0.00119	CID (Collision Induced Dissociation)	MS2	57.0304	150	44.135	8821	WT-a.raw	F635	2.61	1
FALSE	High	Sequest HT (A2)	Unambiguous	IFDVSAFEK		1	ACRE_091090	ACRE_091090	0	2	0.6308	0	1	1	528.275	1055.54	1055.54	0.98	0.00052	CID (Collision Induced Dissociation)	MS2	6.82396	21.567	42.6572	7188	CCAB-3a3.raw	F594	2.6	1
FALSE	High	Sequest HT (A2)	Unambiguous	IEVIAHNELSGR		1	ACRE_091090	ACRE_091090	0	3	0.5308	0	1	1	446.577	1337.72	1337.72	0.15	7e-05	CID (Collision Induced Dissociation)	MS2	38.1476	17.736	34.3421	5718	CCAB-3a2-2.raw	F593	2.6	1
FALSE	High	Sequest HT (A2)	Unambiguous	TNNLGDAVVIQQK		1	ACRE_091090	ACRE_091090	0	2	0.5538	0	1	1	700.38	1399.75	1399.75	-0.21	-0.00015	CID (Collision Induced Dissociation)	MS2	59.1463	150	61.4062	13686	CCAB-2a3-2.raw	F587	2.6	1
FALSE	High	Sequest HT (A2)	Unambiguous	SGGKIEVIAHNELSGR		1	ACRE_091090	ACRE_091090	1	3	0.1154	0	1	1	556.3	1666.89	1666.89	-0.89	-0.00049	CID (Collision Induced Dissociation)	MS2	58.9522	150	63.452	14072	CCAB-2a3-2.raw	F587	2.6	1
FALSE	High	Sequest HT (A2)	Unambiguous	KFIINASQPANDK		1	ACRE_091090	ACRE_091090	1	2	0.2154	0	1	1	723.378	1445.75	1445.77	-18.6	-0.01345	CID (Collision Induced Dissociation)	MS2	56.2163	82.186	34.0008	6061	CCAB-4a2-2.raw	F599	2.6	1
FALSE	High	Sequest HT (A2)	Unambiguous	KFIINASQPANDK		1	ACRE_091090	ACRE_091090	1	3	0.2857	0	1	1	482.588	1445.75	1445.77	-17.55	-0.00846	CID (Collision Induced Dissociation)	MS2	60.7048	150	32.8755	3598	CCAB-4a3.raw	F600	2.59	1
FALSE	High	Sequest HT (A2)	Unambiguous	TNNLGDAVVIQQK		1	ACRE_091090	ACRE_091090	0	2	0.4302	0	1	1	700.38	1399.75	1399.75	-1.59	-0.00111	CID (Collision Induced Dissociation)	MS2	62.786	150	63.531	13041	CCAB-3a2-2.raw	F593	2.58	1
FALSE	High	Sequest HT (A2)	Unambiguous	TNNLGDAVVIQQK		1	ACRE_091090	ACRE_091090	0	2	0.4574	0	1	1	700.38	1399.75	1399.75	-0.64	-0.00044	CID (Collision Induced Dissociation)	MS2	17.2455	150	67.2543	14650	CCAB-2a3-2.raw	F587	2.58	1
FALSE	High	Sequest HT (A2)	Unambiguous	FIINASQPANDKIFDVSAFEK		1	ACRE_091090	ACRE_091090	1	3	0.3268	0	1	1	785.41	2354.22	2354.2	5.99	0.0047	CID (Collision Induced Dissociation)	MS2	27.0867	150	51.0092	12105	CCAB-4a2-2.raw	F599	2.57	1
FALSE	High	Sequest HT (A2)	Unambiguous	IEVIAHNELSGR		1	ACRE_091090	ACRE_091090	0	2	0.5837	0	1	1	669.363	1337.72	1337.72	0.69	0.00046	CID (Collision Induced Dissociation)	MS2	64.392	150	55.4016	12180	CCAB-3a3-2.raw	F595	2.57	1
FALSE	High	Sequest HT (A2)	Unambiguous	IEVIAHNELSGR		1	ACRE_091090	ACRE_091090	0	2	0.5642	0	1	1	669.362	1337.72	1337.72	0.08	5e-05	CID (Collision Induced Dissociation)	MS2	32.4751	150	51.2322	9254	CCAB-3a3.raw	F594	2.57	1
FALSE	High	Sequest HT (A2)	Unambiguous	TNNLGDAVVIQQK		1	ACRE_091090	ACRE_091090	0	2	0.3658	0	1	1	700.38	1399.75	1399.75	-0.23	-0.00016	CID (Collision Induced Dissociation)	MS2	29.5362	150	51.7567	7917	CCAB-4a3.raw	F600	2.57	1
FALSE	High	Sequest HT (A2)	Unambiguous	IEVIAHNELSGR		1	ACRE_091090	ACRE_091090	0	2	0.5312	0	1	1	669.367	1337.73	1337.72	7.75	0.00519	CID (Collision Induced Dissociation)	MS2	58.5511	22.709	36.1711	6515	CCAB-3a3-2.raw	F595	2.56	1
FALSE	High	Sequest HT (A2)	Unambiguous	IEVIAHNELSGR		1	ACRE_091090	ACRE_091090	0	3	0.3594	0	1	1	446.577	1337.72	1337.72	-0.57	-0.00025	CID (Collision Induced Dissociation)	MS2	55.859	127.779	35.2324	5255	CCAB-4a2.raw	F598	2.56	1
FALSE	High	Sequest HT (A2)	Unambiguous	FIINASQPANDKIFDVSAFEK		1	ACRE_091090	ACRE_091090	1	3	0.4297	0	1	1	785.41	2354.21	2354.2	4.98	0.00391	CID (Collision Induced Dissociation)	MS2	56.3296	150	53.8725	10328	WT-a.raw	F635	2.56	1
FALSE	High	Sequest HT (A2)	Unambiguous	IEVIAHNELSGR		1	ACRE_091090	ACRE_091090	0	2	0.4375	0	1	1	669.361	1337.71	1337.72	-1.79	-0.0012	CID (Collision Induced Dissociation)	MS2	30.1854	150	54.344	11947	CCAB-3a3-2.raw	F595	2.56	1
FALSE	High	Sequest HT (A2)	Unambiguous	TNNLGDAVVIQQK		1	ACRE_091090	ACRE_091090	0	2	0.3686	0	1	1	700.379	1399.75	1399.75	-2.02	-0.00141	CID (Collision Induced Dissociation)	MS2	66.476	150	42.9841	7269	CCAB-3a3.raw	F594	2.55	1
FALSE	High	Sequest HT (A2)	Unambiguous	SGGKIEVIAHNELSGR		1	ACRE_091090	ACRE_091090	1	3	0.3882	0	1	1	556.3	1666.89	1666.89	-0.37	-0.0002	CID (Collision Induced Dissociation)	MS2	28.6876	150	59.0424	9981	CCAB-4a1.raw	F596	2.55	1
FALSE	High	Sequest HT (A2)	Unambiguous	IEVIAHNELSGR		1	ACRE_091090	ACRE_091090	0	2	0.4941	0	1	1	669.362	1337.72	1337.72	-0.65	-0.00043	CID (Collision Induced Dissociation)	MS2	65.4255	150	61.0822	13433	CCAB-3a3-2.raw	F595	2.55	1
FALSE	High	Sequest HT (A2)	Unambiguous	TNNLGDAVVIQQK		1	ACRE_091090	ACRE_091090	0	2	0.4235	0	1	1	700.38	1399.75	1399.75	-0.49	-0.00034	CID (Collision Induced Dissociation)	MS2	16.0816	150	64.5264	11515	CCAB-3a3.raw	F594	2.55	1
FALSE	High	Sequest HT (A2)	Unambiguous	IEVIAHNELSGR		1	ACRE_091090	ACRE_091090	0	2	0.5843	0	1	1	669.362	1337.72	1337.72	-0.62	-0.00041	CID (Collision Induced Dissociation)	MS2	38.1735	150	58.5006	12880	CCAB-3a3-2.raw	F595	2.55	1
FALSE	High	Sequest HT (A2)	Unambiguous	KFIINASQPANDK		1	ACRE_091090	ACRE_091090	1	3	0.3216	0	1	1	482.597	1445.78	1445.77	0.43	0.00021	CID (Collision Induced Dissociation)	MS2	13.5355	3.87	33.7692	5758	CCAB-2a3-2.raw	F587	2.55	1
FALSE	High	Sequest HT (A2)	Unambiguous	FIINASQPANDKIFDVSAFEK		1	ACRE_091090	ACRE_091090	1	3	0.1811	0	1	1	785.404	2354.2	2354.2	-1.83	-0.00144	CID (Collision Induced Dissociation)	MS2	77.984	150	53.9017	12730	CCAB-4a2-2.raw	F599	2.54	1
FALSE	High	Sequest HT (A2)	Unambiguous	TNNLGDAVVIQQK		1	ACRE_091090	ACRE_091090	0	2	0.4528	0	1	1	700.38	1399.75	1399.75	-1.38	-0.00097	CID (Collision Induced Dissociation)	MS2	37.5614	150	65.1578	14353	CCAB-2a3-2.raw	F587	2.54	1
FALSE	High	Sequest HT (A2)	Unambiguous	SGGKIEVIAHNELSGR		1	ACRE_091090	ACRE_091090	1	3	0.5118	0	1	1	556.301	1666.89	1666.89	0.47	0.00026	CID (Collision Induced Dissociation)	MS2	24.2678	150	60.8938	11090	CCAB-4a2.raw	F598	2.54	1
FALSE	High	Sequest HT (A2)	Unambiguous	TNNLGDAVVIQQK		1	ACRE_091090	ACRE_091090	0	2	0.3858	0	1	1	700.38	1399.75	1399.75	-0.99	-0.00069	CID (Collision Induced Dissociation)	MS2	77.5758	150	57.8878	10614	CCAB-4a3-2.raw	F601	2.54	1
FALSE	High	Sequest HT (A2)	Unambiguous	IEVIAHNELSGR		1	ACRE_091090	ACRE_091090	0	3	0.5866	0	1	1	446.578	1337.72	1337.72	1.07	0.00047	CID (Collision Induced Dissociation)	MS2	54.4008	37.9	38.0541	7651	CCAB-4a2-2.raw	F599	2.54	1
FALSE	High	Sequest HT (A2)	Unambiguous	IFDVSAFEK		1	ACRE_091090	ACRE_091090	0	2	0.4646	0	1	1	528.275	1055.54	1055.54	1.44	0.00076	CID (Collision Induced Dissociation)	MS2	15.6058	78.073	42.6361	7304	CCAB-4a2.raw	F598	2.54	1
FALSE	High	Sequest HT (A2)	Unambiguous	IEVIAHNELSGR		1	ACRE_091090	ACRE_091090	0	2	0.5276	0	1	1	669.362	1337.72	1337.72	-0.8	-0.00053	CID (Collision Induced Dissociation)	MS2	20.4243	150	62.8656	13786	CCAB-3a3-2.raw	F595	2.54	1
FALSE	High	Sequest HT (A2)	Unambiguous	FIINASQPANDKIFDVSAFEK		1	ACRE_091090	ACRE_091090	1	3	0.3504	0	1	1	785.407	2354.21	2354.2	1.6	0.00126	CID (Collision Induced Dissociation)	MS2	15.4102	150	51.3626	12187	CCAB-4a2-2.raw	F599	2.54	1
FALSE	High	Sequest HT (A2)	Unambiguous	TNNLGDAVVIQQK		1	ACRE_091090	ACRE_091090	0	2	0.4291	0	1	1	700.38	1399.75	1399.75	-0.67	-0.00047	CID (Collision Induced Dissociation)	MS2	50.3059	150	51.2281	9253	CCAB-3a3.raw	F594	2.54	1
FALSE	High	Sequest HT (A2)	Unambiguous	TNNLGDAVVIQQK		1	ACRE_091090	ACRE_091090	0	2	0.419	0	1	1	700.38	1399.75	1399.75	-0.77	-0.00054	CID (Collision Induced Dissociation)	MS2	77.9365	150	60.3756	11058	CCAB-4a3-2.raw	F601	2.53	1
FALSE	High	Sequest HT (A2)	Unambiguous	FIINASQPANDKIFDVSAFEK		1	ACRE_091090	ACRE_091090	1	3	0.3755	0	1	1	785.405	2354.2	2354.2	-0.53	-0.00041	CID (Collision Induced Dissociation)	MS2	78.0398	150	57.1624	10559	CCAB-4a2.raw	F598	2.53	1
FALSE	High	Sequest HT (A2)	Unambiguous	IEVIAHNELSGR		1	ACRE_091090	ACRE_091090	0	2	0.4625	0	1	1	669.361	1337.71	1337.72	-1.99	-0.00133	CID (Collision Induced Dissociation)	MS2	48.1168	150	50.9818	11282	CCAB-3a3-2.raw	F595	2.53	1
FALSE	High	Sequest HT (A2)	Unambiguous	SGGKIEVIAHNELSGR		1	ACRE_091090	ACRE_091090	1	3	0.4348	0	1	1	556.3	1666.88	1666.89	-1.44	-0.0008	CID (Collision Induced Dissociation)	MS2	59.6728	150	59.4308	12251	CCAB-3a2-2.raw	F593	2.53	1
FALSE	High	Sequest HT (A2)	Unambiguous	IFDVSAFEK		1	ACRE_091090	ACRE_091090	0	2	0.4941	0	1	1	528.275	1055.54	1055.54	1.58	0.00084	CID (Collision Induced Dissociation)	MS2	5.15814	8.786	42.8944	8479	CCAB-3a2-2.raw	F593	2.53	1
FALSE	High	Sequest HT (A2)	Unambiguous	FYNVVNDEADEDED		1	ACRE_091090	ACRE_091090	0	2	0.7115	0	1	1	837.325	1673.64	1673.64	-1.73	-0.00145	CID (Collision Induced Dissociation)	MS2	24.7862	150	52.2888	9466	CCAB-3a3.raw	F594	2.53	1
FALSE	High	Sequest HT (A2)	Unambiguous	TNNLGDAVVIQQK		1	ACRE_091090	ACRE_091090	0	2	0.415	0	1	1	700.378	1399.75	1399.75	-3.17	-0.00222	CID (Collision Induced Dissociation)	MS2	55.9509	16.608	37.3099	6938	CCAB-3a3-2.raw	F595	2.53	1
FALSE	High	Sequest HT (A2)	Unambiguous	KFIINASQPANDKIFDVSAFEK		1	ACRE_091090	ACRE_091090	2	3	0.4348	0	1	1	828.102	2482.29	2482.3	-2.67	-0.00221	CID (Collision Induced Dissociation)	MS2	81.086	150	46.5333	9372	WT-a.raw	F635	2.53	1
FALSE	High	Sequest HT (A2)	Unambiguous	FYNVVNDEADEDED		1	ACRE_091090	ACRE_091090	0	2	0.7381	0	1	1	837.325	1673.64	1673.64	-0.95	-0.0008	CID (Collision Induced Dissociation)	MS2	65.0798	150	40.093	7933	CCAB-3a3-2.raw	F595	2.52	1
FALSE	High	Sequest HT (A2)	Unambiguous	TNNLGDAVVIQQK		1	ACRE_091090	ACRE_091090	0	2	0.4286	0	1	1	700.379	1399.75	1399.75	-2.41	-0.00169	CID (Collision Induced Dissociation)	MS2	44.7081	150	52.0385	7955	CCAB-4a3.raw	F600	2.52	1
FALSE	High	Sequest HT (A2)	Unambiguous	IEVIAHNELSGR		1	ACRE_091090	ACRE_091090	0	2	0.4167	0	1	1	669.363	1337.72	1337.72	0.67	0.00045	CID (Collision Induced Dissociation)	MS2	85.9306	150	59.7633	14050	CCAB-4a2-2.raw	F599	2.52	1
FALSE	High	Sequest HT (A2)	Unambiguous	SGGKIEVIAHNELSGR		1	ACRE_091090	ACRE_091090	1	3	0.2778	0	1	1	556.301	1666.89	1666.89	1.13	0.00063	CID (Collision Induced Dissociation)	MS2	79.8524	150	66.4116	14379	CCAB-3a3-2.raw	F595	2.52	1
FALSE	High	Sequest HT (A2)	Unambiguous	IEVIAHNELSGR		1	ACRE_091090	ACRE_091090	0	2	0.5278	0	1	1	669.362	1337.72	1337.72	-0.53	-0.00036	CID (Collision Induced Dissociation)	MS2	33.2447	150	59.8208	10958	CCAB-3a3.raw	F594	2.52	1
FALSE	High	Sequest HT (A2)	Unambiguous	TNNLGDAVVIQQK		1	ACRE_091090	ACRE_091090	0	2	0.506	0	1	1	700.381	1399.76	1399.75	1.17	0.00082	CID (Collision Induced Dissociation)	MS2	71.6128	150	57.5076	13549	CCAB-4a2-2.raw	F599	2.51	1
FALSE	High	Sequest HT (A2)	Unambiguous	IEVIAHNELSGR		1	ACRE_091090	ACRE_091090	0	3	0.6135	0	1	1	446.578	1337.72	1337.72	2.33	0.00104	CID (Collision Induced Dissociation)	MS2	6.42953	15.532	33.5652	4780	CCAB-4a2.raw	F598	2.51	1
FALSE	High	Sequest HT (A2)	Unambiguous	IEVIAHNELSGR		1	ACRE_091090	ACRE_091090	0	2	0.3944	0	1	1	669.363	1337.72	1337.72	1.81	0.00121	CID (Collision Induced Dissociation)	MS2	72.7001	124.193	45.8761	9995	CCAB-2a3-2.raw	F587	2.51	1
FALSE	High	Sequest HT (A2)	Unambiguous	TNNLGDAVVIQQK		1	ACRE_091090	ACRE_091090	0	2	0.4104	0	1	1	700.381	1399.75	1399.75	0.23	0.00016	CID (Collision Induced Dissociation)	MS2	38.8544	150	58.631	10755	CCAB-4a3-2.raw	F601	2.51	1
FALSE	High	Sequest HT (A2)	Unambiguous	IEVIAHNELSGR		1	ACRE_091090	ACRE_091090	0	2	0.424	0	1	1	669.365	1337.72	1337.72	3.99	0.00267	CID (Collision Induced Dissociation)	MS2	93.4838	150	56.1432	10261	CCAB-4a3-2.raw	F601	2.5	1
FALSE	High	Sequest HT (A2)	Unambiguous	IEVIAHNELSGR		1	ACRE_091090	ACRE_091090	0	2	0.256	0	1	1	669.366	1337.72	1337.72	5.17	0.00346	CID (Collision Induced Dissociation)	MS2	65.3471	150	44.9562	9559	CCAB-3a3-2.raw	F595	2.5	1
FALSE	High	Sequest HT (A2)	Unambiguous	SGGKIEVIAHNELSGR		1	ACRE_091090	ACRE_091090	1	3	0.16	0	1	1	556.301	1666.89	1666.89	0.41	0.00023	CID (Collision Induced Dissociation)	MS2	35.9827	150	57.8143	10242	CCAB-3a2.raw	F592	2.5	1
FALSE	High	Sequest HT (A2)	Unambiguous	FYNVVNDEADEDED		1	ACRE_091090	ACRE_091090	0	2	0.812	0	1	1	837.325	1673.64	1673.64	-0.79	-0.00066	CID (Collision Induced Dissociation)	MS2	65.2035	150	38.4993	4963	CCAB-4a3.raw	F600	2.5	1
FALSE	High	Sequest HT (A2)	Unambiguous	KFIINASQPANDKIFDVSAFEK		1	ACRE_091090	ACRE_091090	2	3	0.376	0	1	1	828.104	2482.3	2482.3	-0.44	-0.00036	CID (Collision Induced Dissociation)	MS2	44.6755	150	48.0474	9716	WT-a.raw	F635	2.5	1
FALSE	High	Sequest HT (A2)	Unambiguous	IEVIAHNELSGR		1	ACRE_091090	ACRE_091090	0	3	0.324	0	1	1	446.577	1337.72	1337.72	0	0	CID (Collision Induced Dissociation)	MS2	23.825	9.94	35.1289	5990	CCAB-3a2-2.raw	F593	2.5	1
FALSE	High	Sequest HT (A2)	Unambiguous	IEVIAHNELSGR		1	ACRE_091090	ACRE_091090	0	2	0.4418	0	1	1	669.361	1337.71	1337.72	-2.36	-0.00158	CID (Collision Induced Dissociation)	MS2	53.9562	150	57.5165	12846	CCAB-2a3-2.raw	F587	2.49	1
FALSE	High	Sequest HT (A2)	Unambiguous	IEVIAHNELSGR		1	ACRE_091090	ACRE_091090	0	2	0.3414	0	1	1	669.362	1337.72	1337.72	-0.56	-0.00037	CID (Collision Induced Dissociation)	MS2	76.029	150	49.972	9259	CCAB-4a3-2.raw	F601	2.49	1
FALSE	High	Sequest HT (A2)	Unambiguous	TNNLGDAVVIQQK		1	ACRE_091090	ACRE_091090	0	2	0.3695	0	1	1	700.38	1399.75	1399.75	-0.9	-0.00063	CID (Collision Induced Dissociation)	MS2	65.9999	150	49.2982	9096	CCAB-4a3-2.raw	F601	2.49	1
FALSE	High	Sequest HT (A2)	Unambiguous	TNNLGDAVVIQQK		1	ACRE_091090	ACRE_091090	0	2	0.4659	0	1	1	700.381	1399.75	1399.75	0.32	0.00022	CID (Collision Induced Dissociation)	MS2	49.0386	150	64.4318	11651	CCAB-4a3-2.raw	F601	2.49	1
FALSE	High	Sequest HT (A2)	Unambiguous	FIINASQPANDKIFDVSAFEK		1	ACRE_091090	ACRE_091090	1	3	0.379	0	1	1	785.413	2354.22	2354.2	9.04	0.0071	CID (Collision Induced Dissociation)	MS2	88.5171	150	55.0178	12272	CCAB-2a3-2.raw	F587	2.48	1
FALSE	High	Sequest HT (A2)	Unambiguous	FIINASQPANDKIFDVSAFEK		1	ACRE_091090	ACRE_091090	1	3	0.4073	0	1	1	785.406	2354.2	2354.2	0.43	0.00034	CID (Collision Induced Dissociation)	MS2	10.6116	150	52.1984	12371	CCAB-4a2-2.raw	F599	2.48	1
FALSE	High	Sequest HT (A2)	Unambiguous	IFDVSAFEK		1	ACRE_091090	ACRE_091090	0	2	0.5968	0	1	1	528.274	1055.54	1055.54	0.1	5e-05	CID (Collision Induced Dissociation)	MS2	65.4487	150	42.7542	7019	CCAB-3a2.raw	F592	2.48	1
FALSE	High	Sequest HT (A2)	Unambiguous	IEVIAHNELSGR		1	ACRE_091090	ACRE_091090	0	2	0.3952	0	1	1	669.361	1337.72	1337.72	-1.47	-0.00098	CID (Collision Induced Dissociation)	MS2	60.6803	150	44.834	9687	CCAB-2a3-2.raw	F587	2.48	1
FALSE	High	Sequest HT (A2)	Unambiguous	SGGKIEVIAHNELSGR		1	ACRE_091090	ACRE_091090	1	3	0.4315	0	1	1	556.3	1666.89	1666.89	-0.37	-0.00021	CID (Collision Induced Dissociation)	MS2	87.8072	150	38.4985	7476	WT-a.raw	F635	2.48	1
FALSE	High	Sequest HT (A2)	Unambiguous	IEVIAHNELSGR		1	ACRE_091090	ACRE_091090	0	2	0.6089	0	1	1	669.362	1337.72	1337.72	-0.16	-0.0001	CID (Collision Induced Dissociation)	MS2	67.907	150	51.6487	9526	CCAB-4a2.raw	F598	2.48	1
FALSE	High	Sequest HT (A2)	Unambiguous	SGGKIEVIAHNELSGR		1	ACRE_091090	ACRE_091090	1	3	0.2097	0	1	1	556.301	1666.89	1666.89	0.2	0.00011	CID (Collision Induced Dissociation)	MS2	79.8681	150	59.557	14370	CCAB-2b.raw	F588	2.48	1
FALSE	High	Sequest HT (A2)	Unambiguous	IEVIAHNELSGR		1	ACRE_091090	ACRE_091090	0	2	0.4919	0	1	1	669.362	1337.72	1337.72	0.04	2e-05	CID (Collision Induced Dissociation)	MS2	64.0883	150	56.4803	12609	CCAB-2a3-2.raw	F587	2.48	1
FALSE	High	Sequest HT (A2)	Unambiguous	IEVIAHNELSGR		1	ACRE_091090	ACRE_091090	0	2	0.5263	0	1	1	669.362	1337.72	1337.72	-0.7	-0.00047	CID (Collision Induced Dissociation)	MS2	49.3255	150	62.016	13620	CCAB-3a3-2.raw	F595	2.47	1
FALSE	High	Sequest HT (A2)	Unambiguous	KFIINASQPANDK		1	ACRE_091090	ACRE_091090	1	3	0.187	0	1	1	482.597	1445.78	1445.77	1.31	0.00063	CID (Collision Induced Dissociation)	MS2	29.6175	104.344	33.703	3800	CCAB-4a3.raw	F600	2.46	1
FALSE	High	Sequest HT (A2)	Unambiguous	IFDVSAFEK		1	ACRE_091090	ACRE_091090	0	2	0.5772	0	1	1	528.274	1055.54	1055.54	0.76	0.0004	CID (Collision Induced Dissociation)	MS2	5.17789	8.727	42.7873	8862	CCAB-3a3-2.raw	F595	2.46	1
FALSE	High	Sequest HT (A2)	Unambiguous	SGGKIEVIAHNELSGR		1	ACRE_091090	ACRE_091090	1	3	0.1341	0	1	1	556.302	1666.89	1666.89	3.01	0.00167	CID (Collision Induced Dissociation)	MS2	87.2694	150	41.8447	5763	CCAB-4a3.raw	F600	2.46	1
FALSE	High	Sequest HT (A2)	Unambiguous	SGGKIEVIAHNELSGR		1	ACRE_091090	ACRE_091090	1	3	0.3415	0	1	1	556.301	1666.89	1666.89	0.36	0.0002	CID (Collision Induced Dissociation)	MS2	75.0685	150	45.3142	9093	WT-a.raw	F635	2.46	1
FALSE	High	Sequest HT (A2)	Unambiguous	IEVIAHNELSGR		1	ACRE_091090	ACRE_091090	0	3	0.6179	0	1	1	446.577	1337.72	1337.72	0.56	0.00025	CID (Collision Induced Dissociation)	MS2	35.5269	15.12	35.0167	5353	CCAB-4a3-2.raw	F601	2.46	1
FALSE	High	Sequest HT (A2)	Unambiguous	IEVIAHNELSGR		1	ACRE_091090	ACRE_091090	0	2	0.4431	0	1	1	669.362	1337.72	1337.72	-0.69	-0.00046	CID (Collision Induced Dissociation)	MS2	73.4636	150	46.1215	9892	CCAB-3a3-2.raw	F595	2.46	1
FALSE	High	Sequest HT (A2)	Unambiguous	IEVIAHNELSGR		1	ACRE_091090	ACRE_091090	0	2	0.5528	0	1	1	669.362	1337.72	1337.72	-0.04	-3e-05	CID (Collision Induced Dissociation)	MS2	49.6789	150	60.6041	14234	CCAB-4a2-2.raw	F599	2.46	1
FALSE	High	Sequest HT (A2)	Unambiguous	IEVIAHNELSGR		1	ACRE_091090	ACRE_091090	0	2	0.4735	0	1	1	669.364	1337.72	1337.72	1.89	0.00126	CID (Collision Induced Dissociation)	MS2	69.6322	150	45.632	7937	CCAB-3a3.raw	F594	2.45	1
FALSE	High	Sequest HT (A2)	Unambiguous	IFDVSAFEK		1	ACRE_091090	ACRE_091090	0	2	0.5369	0	1	1	528.274	1055.54	1055.54	-0.2	-0.00011	CID (Collision Induced Dissociation)	MS2	25.737	91.224	43.4883	7401	CCAB-3a3.raw	F594	2.44	1
FALSE	High	Sequest HT (A2)	Unambiguous	SGGKIEVIAHNELSGR		1	ACRE_091090	ACRE_091090	1	3	0.3033	0	1	1	556.299	1666.88	1666.89	-2.64	-0.00146	CID (Collision Induced Dissociation)	MS2	79.1777	150	60.7477	9162	CCAB-4a3.raw	F600	2.44	1
FALSE	High	Sequest HT (A2)	Unambiguous	KFIINASQPANDKIFDVSAFEK		1	ACRE_091090	ACRE_091090	2	3	0.2541	0	1	1	828.104	2482.3	2482.3	0.36	0.0003	CID (Collision Induced Dissociation)	MS2	70.7128	150	46.5862	7633	CCAB-1a.raw	F578	2.44	1
FALSE	High	Sequest HT (A2)	Unambiguous	IEVIAHNELSGR		1	ACRE_091090	ACRE_091090	0	2	0.582	0	1	1	669.362	1337.72	1337.72	-0.04	-3e-05	CID (Collision Induced Dissociation)	MS2	36.035	150	54.4242	12137	CCAB-2a3-2.raw	F587	2.44	1
FALSE	High	Sequest HT (A2)	Unambiguous	FYNVVNDEADEDED		1	ACRE_091090	ACRE_091090	0	2	0.6008	0	1	1	837.327	1673.65	1673.64	0.63	0.00052	CID (Collision Induced Dissociation)	MS2	64.6974	80.85	36.3666	6587	CCAB-3a3-2.raw	F595	2.43	1
FALSE	High	Sequest HT (A2)	Unambiguous	IEVIAHNELSGR		1	ACRE_091090	ACRE_091090	0	2	0.4198	0	1	1	669.361	1337.72	1337.72	-1.19	-0.0008	CID (Collision Induced Dissociation)	MS2	78.299	150	50.0677	11027	CCAB-3a3-2.raw	F595	2.43	1
FALSE	High	Sequest HT (A2)	Unambiguous	TNNLGDAVVIQQK		1	ACRE_091090	ACRE_091090	0	2	0.3745	0	1	1	700.38	1399.75	1399.75	-1.35	-0.00095	CID (Collision Induced Dissociation)	MS2	44.82	150	41.2087	5612	CCAB-4a3.raw	F600	2.43	1
FALSE	High	Sequest HT (A2)	Unambiguous	IFDVSAFEK		1	ACRE_091090	ACRE_091090	0	2	0.3951	0	1	1	528.274	1055.54	1055.54	0.01	0	CID (Collision Induced Dissociation)	MS2	32.0606	24.95	43.4617	9239	CCAB-2a3-2.raw	F587	2.43	1
FALSE	High	Sequest HT (A2)	Unambiguous	IFDVSAFEK		1	ACRE_091090	ACRE_091090	0	2	0.3951	0	1	1	528.274	1055.54	1055.54	-0.15	-8e-05	CID (Collision Induced Dissociation)	MS2	13.1297	15.042	43.554	9114	CCAB-3a3-2.raw	F595	2.43	1
FALSE	High	Sequest HT (A2)	Unambiguous	IEVIAHNELSGR		1	ACRE_091090	ACRE_091090	0	3	0.5926	0	1	1	446.578	1337.72	1337.72	0.79	0.00035	CID (Collision Induced Dissociation)	MS2	8.57127	1.677	34.5478	6038	CCAB-2a3-2.raw	F587	2.43	1
FALSE	High	Sequest HT (A2)	Unambiguous	IEVIAHNELSGR		1	ACRE_091090	ACRE_091090	0	2	0.5638	0	1	1	669.361	1337.72	1337.72	-1.27	-0.00085	CID (Collision Induced Dissociation)	MS2	66.5336	150	57.9749	12764	CCAB-3a3-2.raw	F595	2.43	1
FALSE	High	Sequest HT (A2)	Unambiguous	IEVIAHNELSGR		1	ACRE_091090	ACRE_091090	0	2	0.4463	0	1	1	669.363	1337.72	1337.72	1.32	0.00088	CID (Collision Induced Dissociation)	MS2	41.6684	150	57.7878	12907	CCAB-2a3-2.raw	F587	2.42	1
FALSE	High	Sequest HT (A2)	Unambiguous	SGGKIEVIAHNELSGR		1	ACRE_091090	ACRE_091090	1	3	0.3678	0	1	1	556.3	1666.89	1666.89	-0.93	-0.00052	CID (Collision Induced Dissociation)	MS2	25.947	150	60.3402	11034	CCAB-4a2.raw	F598	2.42	1
FALSE	High	Sequest HT (A2)	Unambiguous	SGGKIEVIAHNELSGR		1	ACRE_091090	ACRE_091090	1	3	0.4256	0	1	1	556.301	1666.89	1666.89	0.76	0.00042	CID (Collision Induced Dissociation)	MS2	51.5006	149.039	43.0755	7413	CCAB-4a2.raw	F598	2.42	1
FALSE	High	Sequest HT (A2)	Unambiguous	FYNVVNDEADEDED		1	ACRE_091090	ACRE_091090	0	2	0.8264	0	1	1	837.325	1673.64	1673.64	-1.14	-0.00096	CID (Collision Induced Dissociation)	MS2	64.4297	140.2	37.0286	6205	CCAB-4a1-2.raw	F597	2.42	1
FALSE	High	Sequest HT (A2)	Unambiguous	IEVIAHNELSGR		1	ACRE_091090	ACRE_091090	0	2	0.4896	0	1	1	669.362	1337.72	1337.72	-0.9	-0.0006	CID (Collision Induced Dissociation)	MS2	65.5094	150	61.1509	14351	CCAB-4a2-2.raw	F599	2.41	1
FALSE	High	Sequest HT (A2)	Unambiguous	IEVIAHNELSGR		1	ACRE_091090	ACRE_091090	0	2	0.4606	0	1	1	669.361	1337.71	1337.72	-2.46	-0.00164	CID (Collision Induced Dissociation)	MS2	36.0389	150	50.868	11256	CCAB-3a3-2.raw	F595	2.41	1
FALSE	High	Sequest HT (A2)	Unambiguous	TNNLGDAVVIQQK		1	ACRE_091090	ACRE_091090	0	2	0.39	0	1	1	700.38	1399.75	1399.75	-0.54	-0.00038	CID (Collision Induced Dissociation)	MS2	84.2528	150	51.5887	9513	CCAB-4a2.raw	F598	2.41	1
FALSE	High	Sequest HT (A2)	Unambiguous	FYNVVNDEADEDED		1	ACRE_091090	ACRE_091090	0	2	0.8133	0	1	1	837.329	1673.65	1673.64	3.02	0.00253	CID (Collision Induced Dissociation)	MS2	15.5962	150	60.5879	13329	CCAB-3a3-2.raw	F595	2.41	1
FALSE	High	Sequest HT (A2)	Unambiguous	KFIINASQPANDK		1	ACRE_091090	ACRE_091090	1	3	0.2241	0	1	1	482.596	1445.77	1445.77	-0.05	-2e-05	CID (Collision Induced Dissociation)	MS2	59.1288	150	32.9703	3622	CCAB-4a3.raw	F600	2.41	1
FALSE	High	Sequest HT (A2)	Unambiguous	IEVIAHNELSGR		1	ACRE_091090	ACRE_091090	0	2	0.3333	0	1	1	669.361	1337.72	1337.72	-1.59	-0.00107	CID (Collision Induced Dissociation)	MS2	58.5928	150	56.195	12360	CCAB-3a3-2.raw	F595	2.4	1
FALSE	High	Sequest HT (A2)	Unambiguous	TNNLGDAVVIQQK		1	ACRE_091090	ACRE_091090	0	2	0.3958	0	1	1	700.382	1399.76	1399.75	2.38	0.00167	CID (Collision Induced Dissociation)	MS2	73.8326	150	45.4469	8229	CCAB-4a3-2.raw	F601	2.4	1
FALSE	High	Sequest HT (A2)	Unambiguous	SGGKIEVIAHNELSGR		1	ACRE_091090	ACRE_091090	1	3	0.3792	0	1	1	556.299	1666.88	1666.89	-2.48	-0.00138	CID (Collision Induced Dissociation)	MS2	87.3068	150	58.767	12108	CCAB-3a2-2.raw	F593	2.4	1
FALSE	High	Sequest HT (A2)	Unambiguous	IEVIAHNELSGR		1	ACRE_091090	ACRE_091090	0	2	0.5021	0	1	1	669.362	1337.72	1337.72	-0.88	-0.00059	CID (Collision Induced Dissociation)	MS2	61.9964	150	47.2404	8313	CCAB-3a3.raw	F594	2.39	1
FALSE	High	Sequest HT (A2)	Unambiguous	TNNLGDAVVIQQK		1	ACRE_091090	ACRE_091090	0	2	0.523	0	1	1	700.379	1399.75	1399.75	-2.09	-0.00147	CID (Collision Induced Dissociation)	MS2	63.2532	150	63.6578	13061	CCAB-3a2-2.raw	F593	2.39	1
FALSE	High	Sequest HT (A2)	Unambiguous	IEVIAHNELSGR		1	ACRE_091090	ACRE_091090	0	2	0.2385	0	1	1	669.364	1337.72	1337.72	1.94	0.0013	CID (Collision Induced Dissociation)	MS2	67.7252	150	48.7724	10804	CCAB-2a3-2.raw	F587	2.39	1
FALSE	High	Sequest HT (A2)	Unambiguous	IEVIAHNELSGR		1	ACRE_091090	ACRE_091090	0	3	0.4854	0	1	1	446.577	1337.72	1337.72	-0.65	-0.00029	CID (Collision Induced Dissociation)	MS2	70.6098	150	50.0752	8989	CCAB-3a3.raw	F594	2.39	1
FALSE	High	Sequest HT (A2)	Unambiguous	IEVIAHNELSGR		1	ACRE_091090	ACRE_091090	0	2	0.2594	0	1	1	669.363	1337.72	1337.72	1.03	0.00069	CID (Collision Induced Dissociation)	MS2	78.9936	150	49.0799	9044	CCAB-4a3-2.raw	F601	2.39	1
FALSE	High	Sequest HT (A2)	Unambiguous	SGGKIEVIAHNELSGR		1	ACRE_091090	ACRE_091090	1	3	0.3992	0	1	1	556.302	1666.89	1666.89	2.83	0.00157	CID (Collision Induced Dissociation)	MS2	56.126	150	59.3865	14336	CCAB-2b.raw	F588	2.38	1
FALSE	High	Sequest HT (A2)	Unambiguous	SGGKIEVIAHNELSGR		1	ACRE_091090	ACRE_091090	1	3	0.3277	0	1	1	556.299	1666.88	1666.89	-2.25	-0.00125	CID (Collision Induced Dissociation)	MS2	71.555	150	65.8164	14451	CCAB-2a3-2.raw	F587	2.38	1
FALSE	High	Sequest HT (A2)	Unambiguous	IEVIAHNELSGR		1	ACRE_091090	ACRE_091090	0	2	0.3445	0	1	1	669.361	1337.72	1337.72	-1.55	-0.00104	CID (Collision Induced Dissociation)	MS2	62.0159	150	49.9067	8945	CCAB-3a3.raw	F594	2.38	1
FALSE	High	Sequest HT (A2)	Unambiguous	IEVIAHNELSGR		1	ACRE_091090	ACRE_091090	0	2	0.5504	0	1	1	669.363	1337.72	1337.72	0.7	0.00047	CID (Collision Induced Dissociation)	MS2	55.6677	150	59.6138	13307	CCAB-2a3-2.raw	F587	2.38	1
FALSE	High	Sequest HT (A2)	Unambiguous	FIINASQPANDKIFDVSAFEK		1	ACRE_091090	ACRE_091090	1	3	0.3966	0	1	1	785.409	2354.21	2354.2	3.66	0.00287	CID (Collision Induced Dissociation)	MS2	54.7835	150	47.8079	7091	CCAB-4a3.raw	F600	2.37	1
FALSE	High	Sequest HT (A2)	Unambiguous	IEVIAHNELSGR		1	ACRE_091090	ACRE_091090	0	2	0.5612	0	1	1	669.361	1337.71	1337.72	-2.37	-0.00159	CID (Collision Induced Dissociation)	MS2	59.9154	150	58.1907	12996	CCAB-2a3-2.raw	F587	2.37	1
FALSE	High	Sequest HT (A2)	Unambiguous	IEVIAHNELSGR		1	ACRE_091090	ACRE_091090	0	2	0.3051	0	1	1	669.361	1337.71	1337.72	-1.78	-0.00119	CID (Collision Induced Dissociation)	MS2	48.6661	150	47.2722	8644	CCAB-4a3-2.raw	F601	2.36	1
FALSE	High	Sequest HT (A2)	Unambiguous	IFDVSAFEK		1	ACRE_091090	ACRE_091090	0	2	0.3617	0	1	1	528.274	1055.54	1055.54	0.54	0.00029	CID (Collision Induced Dissociation)	MS2	18.0103	33.575	37.5943	5538	CCAB-1a.raw	F578	2.35	1
FALSE	High	Sequest HT (A2)	Unambiguous	IEVIAHNELSGR		1	ACRE_091090	ACRE_091090	0	2	0.4894	0	1	1	669.362	1337.72	1337.72	0.28	0.00019	CID (Collision Induced Dissociation)	MS2	74.2159	150	52.8365	11661	CCAB-3a3-2.raw	F595	2.35	1
FALSE	High	Sequest HT (A2)	Unambiguous	KFIINASQPANDK		1	ACRE_091090	ACRE_091090	1	2	0.1795	0	1	1	723.389	1445.77	1445.77	-2.8	-0.00203	CID (Collision Induced Dissociation)	MS2	64.8043	70.746	35.5047	6399	CCAB-2a3-2.raw	F587	2.34	1
FALSE	High	Sequest HT (A2)	Unambiguous	IEVIAHNELSGR		1	ACRE_091090	ACRE_091090	0	2	0.3162	0	1	1	669.362	1337.72	1337.72	-0.78	-0.00052	CID (Collision Induced Dissociation)	MS2	75.8202	150	56.8641	13402	CCAB-4a2-2.raw	F599	2.34	1
FALSE	High	Sequest HT (A2)	Unambiguous	TNNLGDAVVIQQK		1	ACRE_091090	ACRE_091090	0	2	0.5279	0	1	1	700.382	1399.76	1399.75	1.76	0.00123	CID (Collision Induced Dissociation)	MS2	11.6896	150	61.1832	11168	CCAB-3a3.raw	F594	2.33	1
FALSE	High	Sequest HT (A2)	Unambiguous	TNNLGDAVVIQQK		1	ACRE_091090	ACRE_091090	0	2	0.6137	0	1	1	700.379	1399.75	1399.75	-2.12	-0.00149	CID (Collision Induced Dissociation)	MS2	56.1216	150	65.1669	15128	CCAB-4a2-2.raw	F599	2.33	1
FALSE	High	Sequest HT (A2)	Unambiguous	IEVIAHNELSGR		1	ACRE_091090	ACRE_091090	0	2	0.3391	0	1	1	669.361	1337.71	1337.72	-2.29	-0.00153	CID (Collision Induced Dissociation)	MS2	25.596	150	38.2558	6335	CCAB-4a3-2.raw	F601	2.33	1
FALSE	High	Sequest HT (A2)	Unambiguous	IEVIAHNELSGR		1	ACRE_091090	ACRE_091090	0	2	0.3405	0	1	1	669.362	1337.72	1337.72	0.22	0.00015	CID (Collision Induced Dissociation)	MS2	62.2835	150	59.8058	14059	CCAB-4a2-2.raw	F599	2.32	1
FALSE	High	Sequest HT (A2)	Unambiguous	IEVIAHNELSGR		1	ACRE_091090	ACRE_091090	0	2	0.3879	0	1	1	669.361	1337.72	1337.72	-1.16	-0.00078	CID (Collision Induced Dissociation)	MS2	75.8164	150	54.4052	11960	CCAB-3a3-2.raw	F595	2.32	1
FALSE	High	Sequest HT (A2)	Unambiguous	IEVIAHNELSGR		1	ACRE_091090	ACRE_091090	0	2	0.4416	0	1	1	669.363	1337.72	1337.72	1.35	0.00091	CID (Collision Induced Dissociation)	MS2	86.8886	150	55.6795	13131	CCAB-4a2-2.raw	F599	2.31	1
FALSE	High	Sequest HT (A2)	Unambiguous	SGGKIEVIAHNELSGR		1	ACRE_091090	ACRE_091090	1	2	0.5887	0	1	1	833.947	1666.89	1666.89	0.26	0.00021	CID (Collision Induced Dissociation)	MS2	66.6599	150	55.2311	10012	CCAB-3a3.raw	F594	2.31	1
FALSE	High	Sequest HT (A2)	Unambiguous	IEVIAHNELSGR		1	ACRE_091090	ACRE_091090	0	2	0.5541	0	1	1	669.363	1337.72	1337.72	0.58	0.00039	CID (Collision Induced Dissociation)	MS2	64.7205	150	61.2208	13461	CCAB-3a3-2.raw	F595	2.31	1
FALSE	High	Sequest HT (A2)	Unambiguous	IEVIAHNELSGR		1	ACRE_091090	ACRE_091090	0	2	0.4565	0	1	1	669.363	1337.72	1337.72	1.14	0.00076	CID (Collision Induced Dissociation)	MS2	80.8182	150	55.2787	10082	CCAB-4a3-2.raw	F601	2.3	1
FALSE	High	Sequest HT (A2)	Unambiguous	IEVIAHNELSGR		1	ACRE_091090	ACRE_091090	0	2	0.4565	0	1	1	669.361	1337.71	1337.72	-1.82	-0.00122	CID (Collision Induced Dissociation)	MS2	90.0854	150	52.9259	11678	CCAB-3a3-2.raw	F595	2.3	1
FALSE	High	Sequest HT (A2)	Unambiguous	IEVIAHNELSGR		1	ACRE_091090	ACRE_091090	0	2	0.3974	0	1	1	669.362	1337.72	1337.72	0.1	6e-05	CID (Collision Induced Dissociation)	MS2	65.0302	55.234	35.156	5403	CCAB-4a3-2.raw	F601	2.29	1
FALSE	High	Sequest HT (A2)	Unambiguous	KFIINASQPANDK		1	ACRE_091090	ACRE_091090	1	2	0.214	0	1	1	723.395	1445.78	1445.77	4.98	0.0036	CID (Collision Induced Dissociation)	MS2	71.6017	150	35.1283	5147	CCAB-3a3.raw	F594	2.29	1
FALSE	High	Sequest HT (A2)	Unambiguous	KFIINASQPANDK		1	ACRE_091090	ACRE_091090	1	2	0.0749	0	1	1	723.391	1445.78	1445.77	0.63	0.00045	CID (Collision Induced Dissociation)	MS2	12.108	46.1	35.8035	6376	CCAB-3a3-2.raw	F595	2.27	1
FALSE	High	Sequest HT (A2)	Unambiguous	KFIINASQPANDK		1	ACRE_091090	ACRE_091090	1	2	0.2775	0	1	1	723.391	1445.77	1445.77	-0.51	-0.00037	CID (Collision Induced Dissociation)	MS2	45.5134	127.523	33.756	4969	CCAB-4a3-2.raw	F601	2.27	1
FALSE	High	Sequest HT (A2)	Unambiguous	FYNVVNDEADEDED		1	ACRE_091090	ACRE_091090	0	2	0.4779	0	1	1	837.324	1673.64	1673.64	-2.53	-0.00211	CID (Collision Induced Dissociation)	MS2	54.7767	150	38.4436	4950	CCAB-4a3.raw	F600	2.26	1
FALSE	High	Sequest HT (A2)	Unambiguous	TNNLGDAVVIQQK		1	ACRE_091090	ACRE_091090	0	2	0.44	0	1	1	700.38	1399.75	1399.75	-0.31	-0.00022	CID (Collision Induced Dissociation)	MS2	69.4862	150	60.6074	12495	CCAB-3a2-2.raw	F593	2.25	1
FALSE	High	Sequest HT (A2)	Unambiguous	IEVIAHNELSGR		1	ACRE_091090	ACRE_091090	0	2	0.4978	0	1	1	669.362	1337.72	1337.72	-0.05	-3e-05	CID (Collision Induced Dissociation)	MS2	76.7734	150	60.5717	13513	CCAB-2a3-2.raw	F587	2.25	1
FALSE	High	Sequest HT (A2)	Unambiguous	IEVIAHNELSGR		1	ACRE_091090	ACRE_091090	0	2	0.44	0	1	1	669.363	1337.72	1337.72	0.79	0.00053	CID (Collision Induced Dissociation)	MS2	59.1411	150	51.3754	11368	CCAB-3a3-2.raw	F595	2.25	1
FALSE	High	Sequest HT (A2)	Unambiguous	IEVIAHNELSGR		1	ACRE_091090	ACRE_091090	0	2	0.3511	0	1	1	669.362	1337.72	1337.72	-0.53	-0.00035	CID (Collision Induced Dissociation)	MS2	66.8785	150	48.4185	8586	CCAB-3a3.raw	F594	2.25	1
FALSE	High	Sequest HT (A2)	Unambiguous	IEVIAHNELSGR		1	ACRE_091090	ACRE_091090	0	2	0.3467	0	1	1	669.363	1337.72	1337.72	0.62	0.00041	CID (Collision Induced Dissociation)	MS2	79.2084	150	58.6143	13797	CCAB-4a2-2.raw	F599	2.25	1
FALSE	High	Sequest HT (A2)	Unambiguous	TNNLGDAVVIQQK		1	ACRE_091090	ACRE_091090	0	2	0.4798	0	1	1	700.38	1399.75	1399.75	-1.21	-0.00085	CID (Collision Induced Dissociation)	MS2	34.4755	150	44.2896	6325	CCAB-4a3.raw	F600	2.23	1
FALSE	High	Sequest HT (A2)	Unambiguous	IEVIAHNELSGR		1	ACRE_091090	ACRE_091090	0	2	0.2735	0	1	1	669.365	1337.72	1337.72	3.87	0.00259	CID (Collision Induced Dissociation)	MS2	57.7191	150	46.6131	8496	CCAB-4a3-2.raw	F601	2.23	1
FALSE	High	Sequest HT (A2)	Unambiguous	IEVIAHNELSGR		1	ACRE_091090	ACRE_091090	0	2	0.5516	0	1	1	669.361	1337.72	1337.72	-1.58	-0.00106	CID (Collision Induced Dissociation)	MS2	77.8829	150	64.1759	14198	CCAB-2a3-2.raw	F587	2.23	1
FALSE	High	Sequest HT (A2)	Unambiguous	TNNLGDAVVIQQK		1	ACRE_091090	ACRE_091090	0	2	0.5471	0	1	1	700.381	1399.75	1399.75	0.64	0.00045	CID (Collision Induced Dissociation)	MS2	45.9777	150	61.7431	11236	CCAB-3a3.raw	F594	2.23	1
FALSE	High	Sequest HT (A2)	Unambiguous	FYNVVNDEADEDED		1	ACRE_091090	ACRE_091090	0	2	0.6441	0	1	1	837.331	1673.65	1673.64	5.85	0.0049	CID (Collision Induced Dissociation)	MS2	50.6014	150	52.9412	11681	CCAB-3a3-2.raw	F595	2.22	1
FALSE	High	Sequest HT (A2)	Unambiguous	IEVIAHNELSGR		1	ACRE_091090	ACRE_091090	0	2	0.1946	0	1	1	669.363	1337.72	1337.72	1.01	0.00067	CID (Collision Induced Dissociation)	MS2	63.4685	150	43.8898	7500	CCAB-3a3.raw	F594	2.21	1
FALSE	High	Sequest HT (A2)	Unambiguous	IEVIAHNELSGR		1	ACRE_091090	ACRE_091090	0	2	0.4706	0	1	1	669.364	1337.72	1337.72	3.09	0.00207	CID (Collision Induced Dissociation)	MS2	70.5695	150	54.6368	12011	CCAB-3a3-2.raw	F595	2.21	1
FALSE	High	Sequest HT (A2)	Unambiguous	IEVIAHNELSGR		1	ACRE_091090	ACRE_091090	0	2	0.5747	0	1	1	669.36	1337.71	1337.72	-2.89	-0.00193	CID (Collision Induced Dissociation)	MS2	66.7912	150	56.7865	10347	CCAB-3a3.raw	F594	2.21	1
FALSE	High	Sequest HT (A2)	Unambiguous	IEVIAHNELSGR		1	ACRE_091090	ACRE_091090	0	2	0.448	0	1	1	669.361	1337.71	1337.72	-1.78	-0.00119	CID (Collision Induced Dissociation)	MS2	62.8665	150	57.5389	10503	CCAB-3a3.raw	F594	2.21	1
FALSE	High	Sequest HT (A2)	Unambiguous	TNNLGDAVVIQQK		1	ACRE_091090	ACRE_091090	0	2	0.5682	0	1	1	700.38	1399.75	1399.75	-0.92	-0.00064	CID (Collision Induced Dissociation)	MS2	56.4933	150	57.023	10440	CCAB-4a3-2.raw	F601	2.2	1
FALSE	High	Sequest HT (A2)	Unambiguous	IEVIAHNELSGR		1	ACRE_091090	ACRE_091090	0	2	0.2273	0	1	1	669.362	1337.72	1337.72	-0.58	-0.00039	CID (Collision Induced Dissociation)	MS2	79.5134	150	48.3036	8873	CCAB-4a3-2.raw	F601	2.2	1
FALSE	High	Sequest HT (A2)	Selected	KFIINASQPANDK		1	ACRE_091090	ACRE_091090	1	2	0.0455	0	1	1	723.391	1445.77	1445.77	-0.21	-0.00015	CID (Collision Induced Dissociation)	MS2	14.7425	150	36.3684	5769	CCAB-4a3-2.raw	F601	2.2	1
FALSE	High	Sequest HT (A2)	Unambiguous	IEVIAHNELSGR		1	ACRE_091090	ACRE_091090	0	2	0.3516	0	1	1	669.362	1337.72	1337.72	-0.25	-0.00017	CID (Collision Induced Dissociation)	MS2	82.5012	150	55.6794	12425	CCAB-2a3-2.raw	F587	2.19	1
FALSE	High	Sequest HT (A2)	Unambiguous	IEVIAHNELSGR		1	ACRE_091090	ACRE_091090	0	2	0.4174	0	1	1	669.361	1337.72	1337.72	-1.23	-0.00082	CID (Collision Induced Dissociation)	MS2	68.6505	150	54.2679	12103	CCAB-2a3-2.raw	F587	2.18	1
FALSE	High	Sequest HT (A2)	Unambiguous	IEVIAHNELSGR		1	ACRE_091090	ACRE_091090	0	2	0.4862	0	1	1	669.361	1337.72	1337.72	-1.57	-0.00105	CID (Collision Induced Dissociation)	MS2	84.3478	150	51.963	9405	CCAB-3a3.raw	F594	2.18	1
FALSE	High	Sequest HT (A2)	Unambiguous	IEVIAHNELSGR		1	ACRE_091090	ACRE_091090	0	2	0.53	0	1	1	669.363	1337.72	1337.72	1.04	0.0007	CID (Collision Induced Dissociation)	MS2	45.2462	150	55.0834	12287	CCAB-2a3-2.raw	F587	2.17	1
FALSE	High	Sequest HT (A2)	Unambiguous	IEVIAHNELSGR		1	ACRE_091090	ACRE_091090	0	2	0.4147	0	1	1	669.361	1337.71	1337.72	-1.88	-0.00126	CID (Collision Induced Dissociation)	MS2	65.2834	150	54.9399	9949	CCAB-3a3.raw	F594	2.17	1
FALSE	High	Sequest HT (A2)	Unambiguous	IEVIAHNELSGR		1	ACRE_091090	ACRE_091090	0	2	0.3767	0	1	1	669.363	1337.72	1337.72	0.51	0.00034	CID (Collision Induced Dissociation)	MS2	68.4596	150	43.6828	9316	CCAB-2a3-2.raw	F587	2.15	1
FALSE	High	Sequest HT (A2)	Unambiguous	TNNLGDAVVIQQK		1	ACRE_091090	ACRE_091090	0	2	0.6419	0	1	1	700.383	1399.76	1399.75	3.02	0.00211	CID (Collision Induced Dissociation)	MS2	60.036	150	61.8962	11254	CCAB-3a3.raw	F594	2.15	1
FALSE	High	Sequest HT (A2)	Unambiguous	TNNLGDAVVIQQK		1	ACRE_091090	ACRE_091090	0	2	0.4626	0	1	1	700.38	1399.75	1399.75	-0.79	-0.00055	CID (Collision Induced Dissociation)	MS2	48.2193	150	43.9879	6256	CCAB-4a3.raw	F600	2.14	1
FALSE	High	Sequest HT (A2)	Unambiguous	KFIINASQPANDK		1	ACRE_091090	ACRE_091090	1	2	0.2056	0	1	1	723.391	1445.78	1445.77	0.58	0.00042	CID (Collision Induced Dissociation)	MS2	53.3351	150	35.4447	4227	CCAB-4a3.raw	F600	2.14	1
FALSE	High	Sequest HT (A2)	Unambiguous	IEVIAHNELSGR		1	ACRE_091090	ACRE_091090	0	2	0.5822	0	1	1	669.363	1337.72	1337.72	1.27	0.00085	CID (Collision Induced Dissociation)	MS2	64.4322	150	46.4532	8130	CCAB-3a3.raw	F594	2.13	1
FALSE	High	Sequest HT (A2)	Unambiguous	SGGKIEVIAHNELSGR		1	ACRE_091090	ACRE_091090	1	2	0.3981	0	1	1	833.963	1666.92	1666.89	19.06	0.01588	CID (Collision Induced Dissociation)	MS2	29.213	124.728	45.8903	10465	CCAB-4a2-2.raw	F599	2.11	1
FALSE	High	Sequest HT (A2)	Unambiguous	SGGKIEVIAHNELSGR		1	ACRE_091090	ACRE_091090	1	2	0.4787	0	1	1	833.952	1666.9	1666.89	6.27	0.00522	CID (Collision Induced Dissociation)	MS2	51.5213	150	58.4991	10706	CCAB-3a3.raw	F594	2.11	1
FALSE	High	Sequest HT (A2)	Unambiguous	IFDVSAFEK		1	ACRE_091090	ACRE_091090	0	2	0.4381	0	1	1	528.274	1055.54	1055.54	0.38	0.0002	CID (Collision Induced Dissociation)	MS2	44.9691	150	44.3132	7619	CCAB-3a3.raw	F594	2.1	1
FALSE	High	Sequest HT (A2)	Unambiguous	IEVIAHNELSGR		1	ACRE_091090	ACRE_091090	0	2	0.5048	0	1	1	669.362	1337.72	1337.72	-0.08	-5e-05	CID (Collision Induced Dissociation)	MS2	47.3794	150	52.3613	9479	CCAB-3a3.raw	F594	2.1	1
ACRE_091040	ACRE_091040	17	9	16	9	676	74.8	5.92	50.93	9	Not Found	High	Not Found	Not Found	Not Found	Not Found	Not Found	Not Found	Not Found	Not Found	Not Found	Not Found	Not Found	Not Found	Not Found	Not Found	High	High	Not Found	High	Not Found	Not Found	Not Found	Not Found	Not Found	Not Found	Not Found	Not Found	Not Found	Not Found	High	Not Found	Not Found	Not Found	High	Not Found	Not Found	Not Found	1
Protein Group ID	# Proteins	# Unique Peptides	# Peptides	# PSMs	Group Description	Found in Sample: [S578] F578: Sample, alpha, CCAB-1	Found in Sample: [S579] F579: Sample, precursor, CCAB-1	Found in Sample: [S580] F580: Sample, beta, CCAB-1	Found in Sample: [S587] F587: Sample, alpha, CCAB-2	Found in Sample: [S588] F588: Sample, beta, CCAB-2	Found in Sample: [S589] F589: Sample, beta, CCAB-2	Found in Sample: [S590] F590: Sample, alpha, CCAB-3	Found in Sample: [S591] F591: Sample, alpha, CCAB-3	Found in Sample: [S592] F592: Sample, alpha, CCAB-3	Found in Sample: [S593] F593: Sample, alpha, CCAB-3	Found in Sample: [S594] F594: Sample, alpha, CCAB-3	Found in Sample: [S595] F595: Sample, alpha, CCAB-3	Found in Sample: [S596] F596: Sample, alpha, CCAB-4	Found in Sample: [S597] F597: Sample, alpha, CCAB-4	Found in Sample: [S598] F598: Sample, alpha, CCAB-4	Found in Sample: [S599] F599: Sample, alpha, CCAB-4	Found in Sample: [S600] F600: Sample, alpha, CCAB-4	Found in Sample: [S601] F601: Sample, alpha, CCAB-4	Found in Sample: [S608] F608: Sample, alpha, CCAB-8	Found in Sample: [S609] F609: Sample, precursor, CCAB-8	Found in Sample: [S610] F610: Sample, beta, CCAB-8	Found in Sample: [S623] F623: Sample, alpha, CCAB-11	Found in Sample: [S624] F624: Sample, alpha, CCAB-11	Found in Sample: [S625] F625: Sample, precursor, CCAB-11	Found in Sample: [S626] F626: Sample, precursor, CCAB-11	Found in Sample: [S627] F627: Sample, beta, CCAB-11	Found in Sample: [S628] F628: Sample, beta, CCAB-11	Found in Sample: [S629] F629: Sample, alpha, wild-type b	Found in Sample: [S630] F630: Sample, alpha, wild-type b	Found in Sample: [S631] F631: Sample, precursor, wild-type b	Found in Sample: [S632] F632: Sample, precursor, wild-type b	Found in Sample: [S633] F633: Sample, beta, wild-type b	Found in Sample: [S634] F634: Sample, beta, wild-type b	Found in Sample: [S635] F635: Sample, alpha, wild-type a	Found in Sample: [S636] F636: Sample, precursor, wild-type a	Found in Sample: [S637] F637: Sample, beta, wild-type a	Found in Sample: [S643] F643: Sample, alpha, CCAB-6	Found in Sample: [S644] F644: Sample, alpha, CCAB-6
3278	1	9	9	16	[Master Protein] ACRE_091040	Not Found	High	Not Found	Not Found	Not Found	Not Found	Not Found	Not Found	Not Found	Not Found	Not Found	Not Found	Not Found	Not Found	Not Found	Not Found	High	High	Not Found	High	Not Found	Not Found	Not Found	Not Found	Not Found	Not Found	Not Found	Not Found	Not Found	Not Found	High	Not Found	Not Found	Not Found	High	Not Found	Not Found	Not Found
Checked	Confidence	Identifying Node	PSM Ambiguity	Annotated Sequence	Modifications	# Proteins	Master Protein Accessions	Protein Accessions	# Missed Cleavages	Charge	DeltaScore	DeltaCn	Rank	Search Engine Rank	m/z [Da]	MH+ [Da]	Theo. MH+ [Da]	DeltaM [ppm]	Deltam/z [Da]	Activation Type	MS Order	Isolation Interference [%]	Ion Inject Time [ms]	RT [min]	First Scan	Spectrum File	File ID	XCorr	# Protein Groups
FALSE	High	Sequest HT (A2)	Unambiguous	ANTLAISEGEGVLGR		1	ACRE_091040	ACRE_091040	0	2	0.6043	0	1	1	743.895	1486.78	1486.79	-1.87	-0.00139	CID (Collision Induced Dissociation)	MS2	54.634	17.516	32.3299	5620	CCAB-8ab.raw	F609	4.17	1
FALSE	High	Sequest HT (A2)	Unambiguous	ANTLAISEGEGVLGR		1	ACRE_091040	ACRE_091040	0	2	0.6024	0	1	1	743.895	1486.78	1486.79	-2.24	-0.00167	CID (Collision Induced Dissociation)	MS2	44.6865	150	33.7855	6052	WT-ab.raw	F636	4.1	1
FALSE	High	Sequest HT (A2)	Unambiguous	ANTLAISEGEGVLGR		1	ACRE_091040	ACRE_091040	0	2	0.6324	0	1	1	743.897	1486.79	1486.79	0.01	1e-05	CID (Collision Induced Dissociation)	MS2	43.9727	150	37.7037	4814	CCAB-1ab.raw	F579	4.08	1
FALSE	High	Sequest HT (A2)	Unambiguous	SADPTFGWGPPNGFVFQK		1	ACRE_091040	ACRE_091040	0	2	0.6041	0	1	1	976.471	1951.93	1951.93	0.56	0.00055	CID (Collision Induced Dissociation)	MS2	58.7403	150	43.5169	8448	WT-ab.raw	F636	3.94	1
FALSE	High	Sequest HT (A2)	Unambiguous	SADPTFGWGPPNGFVFQK		1	ACRE_091040	ACRE_091040	0	2	0.6487	0	1	1	976.471	1951.93	1951.93	0.43	0.00042	CID (Collision Induced Dissociation)	MS2	30.905	150	43.6798	8487	WT-ab.raw	F636	3.9	1
FALSE	High	Sequest HT (A2)	Unambiguous	GWWTVASQPAVNSTR		1	ACRE_091040	ACRE_091040	0	2	0.5929	0	1	1	830.414	1659.82	1659.82	-2.4	-0.00199	CID (Collision Induced Dissociation)	MS2	31.2239	150	37.0588	6887	WT-ab.raw	F636	3.39	1
FALSE	High	Sequest HT (A2)	Unambiguous	mVGVDIVSELIEK	M1(Oxidation)	1	ACRE_091040	ACRE_091040	0	2	0.5964	0	1	1	724.378	1447.75	1447.77	-15.24	-0.01103	CID (Collision Induced Dissociation)	MS2	93.3775	89.551	38.5669	7898	CCAB-8ab.raw	F609	3.32	1
FALSE	High	Sequest HT (A2)	Unambiguous	MVGVDIVSELIEK		1	ACRE_091040	ACRE_091040	0	2	0.5208	0	1	1	716.393	1431.78	1431.78	1.02	0.00073	CID (Collision Induced Dissociation)	MS2	52.7275	48.008	47.7219	15005	WT-2ab2.raw	F632	3.13	1
FALSE	High	Sequest HT (A2)	Unambiguous	EITTPTIIEEVSFR		1	ACRE_091040	ACRE_091040	0	2	0.6869	0	1	1	817.94	1634.87	1634.86	5.1	0.00417	CID (Collision Induced Dissociation)	MS2	87.5797	49.059	37.5051	7557	CCAB-8ab.raw	F609	2.97	1
FALSE	High	Sequest HT (A2)	Unambiguous	GFHFYTLNLEK		1	ACRE_091040	ACRE_091040	0	3	0.4982	0	1	1	456.903	1368.69	1368.69	-0.22	-0.0001	CID (Collision Induced Dissociation)	MS2	42.2456	150	42.5854	8228	WT-ab.raw	F636	2.85	1
FALSE	High	Sequest HT (A2)	Unambiguous	GFHFYTLNLEK		1	ACRE_091040	ACRE_091040	0	3	0.4729	0	1	1	456.904	1368.7	1368.69	1.44	0.00066	CID (Collision Induced Dissociation)	MS2	50.3528	150	43.3912	6202	CCAB-1ab.raw	F579	2.77	1
FALSE	High	Sequest HT (A2)	Unambiguous	AFVEFFLPSADWK		1	ACRE_091040	ACRE_091040	0	2	0.2741	0	1	1	778.894	1556.78	1556.78	1.4	0.00109	CID (Collision Induced Dissociation)	MS2	77.5918	113.148	41.5014	8677	CCAB-8ab.raw	F609	2.7	1
FALSE	High	Sequest HT (A2)	Unambiguous	TEmGFNNLR	M3(Oxidation)	1	ACRE_091040	ACRE_091040	0	2	0.6148	0	1	1	549.256	1097.51	1097.5	1.1	0.0006	CID (Collision Induced Dissociation)	MS2	49.7286	32.579	29.3128	3652	CCAB-4a3-2.raw	F601	2.7	1
FALSE	High	Sequest HT (A2)	Unambiguous	DISDLFVR		1	ACRE_091040	ACRE_091040	0	2	0.3975	0	1	1	482.76	964.512	964.51	2.33	0.00112	CID (Collision Induced Dissociation)	MS2	53.2936	17.406	35.6667	6915	CCAB-8ab.raw	F609	2.39	1
FALSE	High	Sequest HT (A2)	Unambiguous	MVGVDIVSELIEK		1	ACRE_091040	ACRE_091040	0	2	0.3581	0	1	1	716.391	1431.77	1431.78	-1.23	-0.00088	CID (Collision Induced Dissociation)	MS2	75.1197	150	48.6823	9668	WT-ab.raw	F636	2.29	1
FALSE	High	Sequest HT (A2)	Unambiguous	TEmGFNNLR	M3(Oxidation)	1	ACRE_091040	ACRE_091040	0	2	0.5625	0	1	1	549.256	1097.51	1097.5	0.91	0.0005	CID (Collision Induced Dissociation)	MS2	33.5921	146.095	30.2321	2966	CCAB-4a3.raw	F600	2.24	1
ACRE_091030	ACRE_091030	3	2	6	2	1374	148.9	5.86	16.69	2	Not Found	High	Not Found	Not Found	Not Found	Not Found	Not Found	Not Found	Not Found	Not Found	Not Found	Not Found	Not Found	Not Found	Not Found	Not Found	Not Found	Not Found	Not Found	High	Not Found	Not Found	Not Found	Not Found	Not Found	Not Found	Not Found	Not Found	Not Found	Not Found	High	Not Found	Not Found	Not Found	High	Not Found	Not Found	Not Found	1
Protein Group ID	# Proteins	# Unique Peptides	# Peptides	# PSMs	Group Description	Found in Sample: [S578] F578: Sample, alpha, CCAB-1	Found in Sample: [S579] F579: Sample, precursor, CCAB-1	Found in Sample: [S580] F580: Sample, beta, CCAB-1	Found in Sample: [S587] F587: Sample, alpha, CCAB-2	Found in Sample: [S588] F588: Sample, beta, CCAB-2	Found in Sample: [S589] F589: Sample, beta, CCAB-2	Found in Sample: [S590] F590: Sample, alpha, CCAB-3	Found in Sample: [S591] F591: Sample, alpha, CCAB-3	Found in Sample: [S592] F592: Sample, alpha, CCAB-3	Found in Sample: [S593] F593: Sample, alpha, CCAB-3	Found in Sample: [S594] F594: Sample, alpha, CCAB-3	Found in Sample: [S595] F595: Sample, alpha, CCAB-3	Found in Sample: [S596] F596: Sample, alpha, CCAB-4	Found in Sample: [S597] F597: Sample, alpha, CCAB-4	Found in Sample: [S598] F598: Sample, alpha, CCAB-4	Found in Sample: [S599] F599: Sample, alpha, CCAB-4	Found in Sample: [S600] F600: Sample, alpha, CCAB-4	Found in Sample: [S601] F601: Sample, alpha, CCAB-4	Found in Sample: [S608] F608: Sample, alpha, CCAB-8	Found in Sample: [S609] F609: Sample, precursor, CCAB-8	Found in Sample: [S610] F610: Sample, beta, CCAB-8	Found in Sample: [S623] F623: Sample, alpha, CCAB-11	Found in Sample: [S624] F624: Sample, alpha, CCAB-11	Found in Sample: [S625] F625: Sample, precursor, CCAB-11	Found in Sample: [S626] F626: Sample, precursor, CCAB-11	Found in Sample: [S627] F627: Sample, beta, CCAB-11	Found in Sample: [S628] F628: Sample, beta, CCAB-11	Found in Sample: [S629] F629: Sample, alpha, wild-type b	Found in Sample: [S630] F630: Sample, alpha, wild-type b	Found in Sample: [S631] F631: Sample, precursor, wild-type b	Found in Sample: [S632] F632: Sample, precursor, wild-type b	Found in Sample: [S633] F633: Sample, beta, wild-type b	Found in Sample: [S634] F634: Sample, beta, wild-type b	Found in Sample: [S635] F635: Sample, alpha, wild-type a	Found in Sample: [S636] F636: Sample, precursor, wild-type a	Found in Sample: [S637] F637: Sample, beta, wild-type a	Found in Sample: [S643] F643: Sample, alpha, CCAB-6	Found in Sample: [S644] F644: Sample, alpha, CCAB-6
842	1	2	2	6	[Master Protein] ACRE_091030	Not Found	High	Not Found	Not Found	Not Found	Not Found	Not Found	Not Found	Not Found	Not Found	Not Found	Not Found	Not Found	Not Found	Not Found	Not Found	Not Found	Not Found	Not Found	High	Not Found	Not Found	Not Found	Not Found	Not Found	Not Found	Not Found	Not Found	Not Found	Not Found	High	Not Found	Not Found	Not Found	High	Not Found	Not Found	Not Found
Checked	Confidence	Identifying Node	PSM Ambiguity	Annotated Sequence	Modifications	# Proteins	Master Protein Accessions	Protein Accessions	# Missed Cleavages	Charge	DeltaScore	DeltaCn	Rank	Search Engine Rank	m/z [Da]	MH+ [Da]	Theo. MH+ [Da]	DeltaM [ppm]	Deltam/z [Da]	Activation Type	MS Order	Isolation Interference [%]	Ion Inject Time [ms]	RT [min]	First Scan	Spectrum File	File ID	XCorr	# Protein Groups
FALSE	High	Sequest HT (A2)	Unambiguous	INNQNPAPQVPVAGLR		1	ACRE_091030	ACRE_091030	0	2	0.487	0	1	1	844.462	1687.92	1687.92	-3.98	-0.00336	CID (Collision Induced Dissociation)	MS2	41.7148	28.006	31.2383	5179	CCAB-8ab.raw	F609	3.47	1
FALSE	High	Sequest HT (A2)	Unambiguous	LHELIPGAEDWPTFVDNASR		1	ACRE_091030	ACRE_091030	0	3	0.4965	0	1	1	756.374	2267.11	2267.11	-0.5	-0.00038	CID (Collision Induced Dissociation)	MS2	65.2164	150	45.532	6690	CCAB-1ab.raw	F579	2.84	1
FALSE	High	Sequest HT (A2)	Unambiguous	LHELIPGAEDWPTFVDNASR		1	ACRE_091030	ACRE_091030	0	3	0.3772	0	1	1	756.374	2267.11	2267.11	-0.15	-0.00011	CID (Collision Induced Dissociation)	MS2	86.4605	150	45.2995	8862	WT-ab.raw	F636	2.81	1
FALSE	High	Sequest HT (A2)	Unambiguous	LHELIPGAEDWPTFVDNASR		1	ACRE_091030	ACRE_091030	0	3	0.2727	0	1	1	756.376	2267.11	2267.11	1.74	0.00131	CID (Collision Induced Dissociation)	MS2	70.6012	150	45.1455	8827	WT-ab.raw	F636	2.64	1
FALSE	High	Sequest HT (A2)	Unambiguous	LHELIPGAEDWPTFVDNASR		1	ACRE_091030	ACRE_091030	0	3	0.2794	0	1	1	756.381	2267.13	2267.11	8.18	0.00618	CID (Collision Induced Dissociation)	MS2	57.4608	150	45.6801	6723	CCAB-1ab.raw	F579	2.47	1
FALSE	High	Sequest HT (A2)	Unambiguous	LHELIPGAEDWPTFVDNASR		1	ACRE_091030	ACRE_091030	0	3	0.4106	0	1	1	756.374	2267.11	2267.11	-1.08	-0.00082	CID (Collision Induced Dissociation)	MS2	49.712	30.752	43.8861	13516	WT-2ab2.raw	F632	2.46	1
ACRE_091010	ACRE_091010	12	5	10	5	516	55.8	5.26	32.69	5	Not Found	Not Found	Not Found	Not Found	Not Found	Not Found	Not Found	Not Found	Not Found	Not Found	Not Found	Not Found	Not Found	Not Found	High	High	Not Found	Not Found	Not Found	Not Found	Not Found	Not Found	High	Not Found	Not Found	Not Found	Not Found	High	High	Not Found	Not Found	Not Found	Not Found	Not Found	Not Found	Not Found	Not Found	Not Found	1
Protein Group ID	# Proteins	# Unique Peptides	# Peptides	# PSMs	Group Description	Found in Sample: [S578] F578: Sample, alpha, CCAB-1	Found in Sample: [S579] F579: Sample, precursor, CCAB-1	Found in Sample: [S580] F580: Sample, beta, CCAB-1	Found in Sample: [S587] F587: Sample, alpha, CCAB-2	Found in Sample: [S588] F588: Sample, beta, CCAB-2	Found in Sample: [S589] F589: Sample, beta, CCAB-2	Found in Sample: [S590] F590: Sample, alpha, CCAB-3	Found in Sample: [S591] F591: Sample, alpha, CCAB-3	Found in Sample: [S592] F592: Sample, alpha, CCAB-3	Found in Sample: [S593] F593: Sample, alpha, CCAB-3	Found in Sample: [S594] F594: Sample, alpha, CCAB-3	Found in Sample: [S595] F595: Sample, alpha, CCAB-3	Found in Sample: [S596] F596: Sample, alpha, CCAB-4	Found in Sample: [S597] F597: Sample, alpha, CCAB-4	Found in Sample: [S598] F598: Sample, alpha, CCAB-4	Found in Sample: [S599] F599: Sample, alpha, CCAB-4	Found in Sample: [S600] F600: Sample, alpha, CCAB-4	Found in Sample: [S601] F601: Sample, alpha, CCAB-4	Found in Sample: [S608] F608: Sample, alpha, CCAB-8	Found in Sample: [S609] F609: Sample, precursor, CCAB-8	Found in Sample: [S610] F610: Sample, beta, CCAB-8	Found in Sample: [S623] F623: Sample, alpha, CCAB-11	Found in Sample: [S624] F624: Sample, alpha, CCAB-11	Found in Sample: [S625] F625: Sample, precursor, CCAB-11	Found in Sample: [S626] F626: Sample, precursor, CCAB-11	Found in Sample: [S627] F627: Sample, beta, CCAB-11	Found in Sample: [S628] F628: Sample, beta, CCAB-11	Found in Sample: [S629] F629: Sample, alpha, wild-type b	Found in Sample: [S630] F630: Sample, alpha, wild-type b	Found in Sample: [S631] F631: Sample, precursor, wild-type b	Found in Sample: [S632] F632: Sample, precursor, wild-type b	Found in Sample: [S633] F633: Sample, beta, wild-type b	Found in Sample: [S634] F634: Sample, beta, wild-type b	Found in Sample: [S635] F635: Sample, alpha, wild-type a	Found in Sample: [S636] F636: Sample, precursor, wild-type a	Found in Sample: [S637] F637: Sample, beta, wild-type a	Found in Sample: [S643] F643: Sample, alpha, CCAB-6	Found in Sample: [S644] F644: Sample, alpha, CCAB-6
626	1	5	5	10	[Master Protein] ACRE_091010	Not Found	Not Found	Not Found	Not Found	Not Found	Not Found	Not Found	Not Found	Not Found	Not Found	Not Found	Not Found	Not Found	Not Found	High	High	Not Found	Not Found	Not Found	Not Found	Not Found	Not Found	High	Not Found	Not Found	Not Found	Not Found	High	High	Not Found	Not Found	Not Found	Not Found	Not Found	Not Found	Not Found	Not Found	Not Found
Checked	Confidence	Identifying Node	PSM Ambiguity	Annotated Sequence	Modifications	# Proteins	Master Protein Accessions	Protein Accessions	# Missed Cleavages	Charge	DeltaScore	DeltaCn	Rank	Search Engine Rank	m/z [Da]	MH+ [Da]	Theo. MH+ [Da]	DeltaM [ppm]	Deltam/z [Da]	Activation Type	MS Order	Isolation Interference [%]	Ion Inject Time [ms]	RT [min]	First Scan	Spectrum File	File ID	XCorr	# Protein Groups
FALSE	High	Sequest HT (A2)	Unambiguous	TNSAAADAEIGGGGGAR		1	ACRE_091010	ACRE_091010	0	2	0.6168	0	1	1	737.846	1474.69	1474.69	-1.73	-0.00128	CID (Collision Induced Dissociation)	MS2	35.549	53.696	24.5562	4784	WT-2a2.raw	F630	4.41	1
FALSE	High	Sequest HT (A2)	Unambiguous	TIAEQTLDPAGAAER		1	ACRE_091010	ACRE_091010	0	2	0.6509	0	1	1	771.894	1542.78	1542.78	2.8	0.00216	CID (Collision Induced Dissociation)	MS2	46.9877	44.669	34.663	6326	CCAB-4a2-2.raw	F599	4.24	1
FALSE	High	Sequest HT (A2)	Unambiguous	TIAEQTLDPAGAAER		1	ACRE_091010	ACRE_091010	0	2	0.6086	0	1	1	771.89	1542.77	1542.78	-1.76	-0.00136	CID (Collision Induced Dissociation)	MS2	37.4005	150	35.2207	5252	CCAB-4a2.raw	F598	3.96	1
FALSE	High	Sequest HT (A2)	Unambiguous	TNSAAADAEIGGGGGAR		1	ACRE_091010	ACRE_091010	0	2	0.7077	0	1	1	737.846	1474.68	1474.69	-2.38	-0.00176	CID (Collision Induced Dissociation)	MS2	46.553	48.505	24.5716	5089	CCAB-11a2.raw	F624	3.66	1
FALSE	High	Sequest HT (A2)	Unambiguous	ETPVPDTPGANDGAAEIYK		1	ACRE_091010	ACRE_091010	0	2	0.6424	0	1	1	972.962	1944.92	1944.92	-0.77	-0.00075	CID (Collision Induced Dissociation)	MS2	40.1906	15.48	32.8181	8905	CCAB-11a2.raw	F624	3.3	1
FALSE	High	Sequest HT (A2)	Unambiguous	ETPVPDTPGANDGAAEIYK		1	ACRE_091010	ACRE_091010	0	2	0.567	0	1	1	972.963	1944.92	1944.92	-0.22	-0.00022	CID (Collision Induced Dissociation)	MS2	27.833	22.876	32.7508	8565	WT-2a2.raw	F630	2.91	1
FALSE	High	Sequest HT (A2)	Unambiguous	SYRGEAPPQTAR		1	ACRE_091010	ACRE_091010	1	3	0.3408	0	1	1	444.893	1332.66	1332.67	-0.94	-0.00042	CID (Collision Induced Dissociation)	MS2	12.8224	14.581	21.2148	3860	CCAB-11a2.raw	F624	2.67	1
FALSE	High	Sequest HT (A2)	Unambiguous	KTNSAAADAEIGGGGGAR		1	ACRE_091010	ACRE_091010	1	3	0.3984	0	1	1	534.932	1602.78	1602.78	-1.36	-0.00073	CID (Collision Induced Dissociation)	MS2	46.9104	48.036	22.4523	4262	CCAB-11a2.raw	F624	2.56	1
FALSE	High	Sequest HT (A2)	Unambiguous	ETPVPDTPGANDGAAEIYK		1	ACRE_091010	ACRE_091010	0	2	0.7047	0	1	1	972.968	1944.93	1944.92	5.57	0.00541	CID (Collision Induced Dissociation)	MS2	31.3465	46.185	32.3059	5954	WT-2a.raw	F629	2.54	1
FALSE	High	Sequest HT (A2)	Unambiguous	KTNSAAADAEIGGGGGAR		1	ACRE_091010	ACRE_091010	1	3	0.1585	0	1	1	534.933	1602.78	1602.78	0.05	3e-05	CID (Collision Induced Dissociation)	MS2	32.9742	51.283	22.4586	3999	WT-2a2.raw	F630	2.46	1
ACRE_091000	ACRE_091000	4	1	1	1	372	40.9	7.72	2.42	1	Not Found	Not Found	Not Found	Not Found	Not Found	Not Found	Not Found	Not Found	Not Found	Not Found	Not Found	Not Found	Not Found	Not Found	Not Found	Not Found	Not Found	Not Found	Not Found	Not Found	Not Found	Not Found	Not Found	Not Found	Not Found	Not Found	Not Found	Not Found	Not Found	Not Found	Not Found	Not Found	High	Not Found	Not Found	Not Found	Not Found	Not Found	1
Protein Group ID	# Proteins	# Unique Peptides	# Peptides	# PSMs	Group Description	Found in Sample: [S578] F578: Sample, alpha, CCAB-1	Found in Sample: [S579] F579: Sample, precursor, CCAB-1	Found in Sample: [S580] F580: Sample, beta, CCAB-1	Found in Sample: [S587] F587: Sample, alpha, CCAB-2	Found in Sample: [S588] F588: Sample, beta, CCAB-2	Found in Sample: [S589] F589: Sample, beta, CCAB-2	Found in Sample: [S590] F590: Sample, alpha, CCAB-3	Found in Sample: [S591] F591: Sample, alpha, CCAB-3	Found in Sample: [S592] F592: Sample, alpha, CCAB-3	Found in Sample: [S593] F593: Sample, alpha, CCAB-3	Found in Sample: [S594] F594: Sample, alpha, CCAB-3	Found in Sample: [S595] F595: Sample, alpha, CCAB-3	Found in Sample: [S596] F596: Sample, alpha, CCAB-4	Found in Sample: [S597] F597: Sample, alpha, CCAB-4	Found in Sample: [S598] F598: Sample, alpha, CCAB-4	Found in Sample: [S599] F599: Sample, alpha, CCAB-4	Found in Sample: [S600] F600: Sample, alpha, CCAB-4	Found in Sample: [S601] F601: Sample, alpha, CCAB-4	Found in Sample: [S608] F608: Sample, alpha, CCAB-8	Found in Sample: [S609] F609: Sample, precursor, CCAB-8	Found in Sample: [S610] F610: Sample, beta, CCAB-8	Found in Sample: [S623] F623: Sample, alpha, CCAB-11	Found in Sample: [S624] F624: Sample, alpha, CCAB-11	Found in Sample: [S625] F625: Sample, precursor, CCAB-11	Found in Sample: [S626] F626: Sample, precursor, CCAB-11	Found in Sample: [S627] F627: Sample, beta, CCAB-11	Found in Sample: [S628] F628: Sample, beta, CCAB-11	Found in Sample: [S629] F629: Sample, alpha, wild-type b	Found in Sample: [S630] F630: Sample, alpha, wild-type b	Found in Sample: [S631] F631: Sample, precursor, wild-type b	Found in Sample: [S632] F632: Sample, precursor, wild-type b	Found in Sample: [S633] F633: Sample, beta, wild-type b	Found in Sample: [S634] F634: Sample, beta, wild-type b	Found in Sample: [S635] F635: Sample, alpha, wild-type a	Found in Sample: [S636] F636: Sample, precursor, wild-type a	Found in Sample: [S637] F637: Sample, beta, wild-type a	Found in Sample: [S643] F643: Sample, alpha, CCAB-6	Found in Sample: [S644] F644: Sample, alpha, CCAB-6
3180	1	1	1	1	[Master Protein] ACRE_091000	Not Found	Not Found	Not Found	Not Found	Not Found	Not Found	Not Found	Not Found	Not Found	Not Found	Not Found	Not Found	Not Found	Not Found	Not Found	Not Found	Not Found	Not Found	Not Found	Not Found	Not Found	Not Found	Not Found	Not Found	Not Found	Not Found	Not Found	Not Found	Not Found	Not Found	Not Found	Not Found	High	Not Found	Not Found	Not Found	Not Found	Not Found
Checked	Confidence	Identifying Node	PSM Ambiguity	Annotated Sequence	Modifications	# Proteins	Master Protein Accessions	Protein Accessions	# Missed Cleavages	Charge	DeltaScore	DeltaCn	Rank	Search Engine Rank	m/z [Da]	MH+ [Da]	Theo. MH+ [Da]	DeltaM [ppm]	Deltam/z [Da]	Activation Type	MS Order	Isolation Interference [%]	Ion Inject Time [ms]	RT [min]	First Scan	Spectrum File	File ID	XCorr	# Protein Groups
FALSE	High	Sequest HT (A2)	Unambiguous	MLRLETSALMMPCLSR		1	ACRE_091000	ACRE_091000	1	3	0.219	0	1	1	617.978	1851.92	1851.93	-6.11	-0.00377	CID (Collision Induced Dissociation)	MS2	46.168	9.429	38.9144	11743	WT-2b2.raw	F634	2.42	1
ACRE_090930	ACRE_090930	6	2	2	2	554	60.8	5.41	6.21	2	Not Found	Not Found	Not Found	Not Found	Not Found	Not Found	Not Found	Not Found	Not Found	Not Found	Not Found	Not Found	Not Found	Not Found	Not Found	Not Found	Not Found	Not Found	Not Found	High	Not Found	Not Found	Not Found	Not Found	Not Found	High	Not Found	Not Found	Not Found	Not Found	Not Found	Not Found	Not Found	Not Found	Not Found	Not Found	Not Found	Not Found	1
Protein Group ID	# Proteins	# Unique Peptides	# Peptides	# PSMs	Group Description	Found in Sample: [S578] F578: Sample, alpha, CCAB-1	Found in Sample: [S579] F579: Sample, precursor, CCAB-1	Found in Sample: [S580] F580: Sample, beta, CCAB-1	Found in Sample: [S587] F587: Sample, alpha, CCAB-2	Found in Sample: [S588] F588: Sample, beta, CCAB-2	Found in Sample: [S589] F589: Sample, beta, CCAB-2	Found in Sample: [S590] F590: Sample, alpha, CCAB-3	Found in Sample: [S591] F591: Sample, alpha, CCAB-3	Found in Sample: [S592] F592: Sample, alpha, CCAB-3	Found in Sample: [S593] F593: Sample, alpha, CCAB-3	Found in Sample: [S594] F594: Sample, alpha, CCAB-3	Found in Sample: [S595] F595: Sample, alpha, CCAB-3	Found in Sample: [S596] F596: Sample, alpha, CCAB-4	Found in Sample: [S597] F597: Sample, alpha, CCAB-4	Found in Sample: [S598] F598: Sample, alpha, CCAB-4	Found in Sample: [S599] F599: Sample, alpha, CCAB-4	Found in Sample: [S600] F600: Sample, alpha, CCAB-4	Found in Sample: [S601] F601: Sample, alpha, CCAB-4	Found in Sample: [S608] F608: Sample, alpha, CCAB-8	Found in Sample: [S609] F609: Sample, precursor, CCAB-8	Found in Sample: [S610] F610: Sample, beta, CCAB-8	Found in Sample: [S623] F623: Sample, alpha, CCAB-11	Found in Sample: [S624] F624: Sample, alpha, CCAB-11	Found in Sample: [S625] F625: Sample, precursor, CCAB-11	Found in Sample: [S626] F626: Sample, precursor, CCAB-11	Found in Sample: [S627] F627: Sample, beta, CCAB-11	Found in Sample: [S628] F628: Sample, beta, CCAB-11	Found in Sample: [S629] F629: Sample, alpha, wild-type b	Found in Sample: [S630] F630: Sample, alpha, wild-type b	Found in Sample: [S631] F631: Sample, precursor, wild-type b	Found in Sample: [S632] F632: Sample, precursor, wild-type b	Found in Sample: [S633] F633: Sample, beta, wild-type b	Found in Sample: [S634] F634: Sample, beta, wild-type b	Found in Sample: [S635] F635: Sample, alpha, wild-type a	Found in Sample: [S636] F636: Sample, precursor, wild-type a	Found in Sample: [S637] F637: Sample, beta, wild-type a	Found in Sample: [S643] F643: Sample, alpha, CCAB-6	Found in Sample: [S644] F644: Sample, alpha, CCAB-6
1533	1	2	2	2	[Master Protein] ACRE_090930	Not Found	Not Found	Not Found	Not Found	Not Found	Not Found	Not Found	Not Found	Not Found	Not Found	Not Found	Not Found	Not Found	Not Found	Not Found	Not Found	Not Found	Not Found	Not Found	High	Not Found	Not Found	Not Found	Not Found	Not Found	High	Not Found	Not Found	Not Found	Not Found	Not Found	Not Found	Not Found	Not Found	Not Found	Not Found	Not Found	Not Found
Checked	Confidence	Identifying Node	PSM Ambiguity	Annotated Sequence	Modifications	# Proteins	Master Protein Accessions	Protein Accessions	# Missed Cleavages	Charge	DeltaScore	DeltaCn	Rank	Search Engine Rank	m/z [Da]	MH+ [Da]	Theo. MH+ [Da]	DeltaM [ppm]	Deltam/z [Da]	Activation Type	MS Order	Isolation Interference [%]	Ion Inject Time [ms]	RT [min]	First Scan	Spectrum File	File ID	XCorr	# Protein Groups
FALSE	High	Sequest HT (A2)	Unambiguous	ITLSDEESPSQWQR		1	ACRE_090930	ACRE_090930	0	2	0.6218	0	1	1	838.397	1675.79	1675.79	-3.86	-0.00323	CID (Collision Induced Dissociation)	MS2	57.532	54.942	32.9579	6706	CCAB-11b.raw	F627	3.49	1
FALSE	High	Sequest HT (A2)	Unambiguous	EDRPVSLGGYAYSGGGRAIVR		1	ACRE_090930	ACRE_090930	1	3	0.4228	0	1	1	727.379	2180.12	2180.12	1.31	0.00095	CID (Collision Induced Dissociation)	MS2	41.1343	87.487	41.2921	8626	CCAB-8ab.raw	F609	2.72	1
ACRE_090890	ACRE_090890	8	1	6	1	110	12.5	6.02	17.94	1	Not Found	Not Found	Not Found	Not Found	Not Found	Not Found	High	Not Found	Not Found	Not Found	Not Found	Not Found	Not Found	Not Found	Not Found	Not Found	Not Found	Not Found	Not Found	Not Found	Not Found	Not Found	Not Found	Not Found	Not Found	Not Found	Not Found	High	High	Not Found	Not Found	Not Found	Not Found	Not Found	Not Found	Not Found	High	High	1
Protein Group ID	# Proteins	# Unique Peptides	# Peptides	# PSMs	Group Description	Found in Sample: [S578] F578: Sample, alpha, CCAB-1	Found in Sample: [S579] F579: Sample, precursor, CCAB-1	Found in Sample: [S580] F580: Sample, beta, CCAB-1	Found in Sample: [S587] F587: Sample, alpha, CCAB-2	Found in Sample: [S588] F588: Sample, beta, CCAB-2	Found in Sample: [S589] F589: Sample, beta, CCAB-2	Found in Sample: [S590] F590: Sample, alpha, CCAB-3	Found in Sample: [S591] F591: Sample, alpha, CCAB-3	Found in Sample: [S592] F592: Sample, alpha, CCAB-3	Found in Sample: [S593] F593: Sample, alpha, CCAB-3	Found in Sample: [S594] F594: Sample, alpha, CCAB-3	Found in Sample: [S595] F595: Sample, alpha, CCAB-3	Found in Sample: [S596] F596: Sample, alpha, CCAB-4	Found in Sample: [S597] F597: Sample, alpha, CCAB-4	Found in Sample: [S598] F598: Sample, alpha, CCAB-4	Found in Sample: [S599] F599: Sample, alpha, CCAB-4	Found in Sample: [S600] F600: Sample, alpha, CCAB-4	Found in Sample: [S601] F601: Sample, alpha, CCAB-4	Found in Sample: [S608] F608: Sample, alpha, CCAB-8	Found in Sample: [S609] F609: Sample, precursor, CCAB-8	Found in Sample: [S610] F610: Sample, beta, CCAB-8	Found in Sample: [S623] F623: Sample, alpha, CCAB-11	Found in Sample: [S624] F624: Sample, alpha, CCAB-11	Found in Sample: [S625] F625: Sample, precursor, CCAB-11	Found in Sample: [S626] F626: Sample, precursor, CCAB-11	Found in Sample: [S627] F627: Sample, beta, CCAB-11	Found in Sample: [S628] F628: Sample, beta, CCAB-11	Found in Sample: [S629] F629: Sample, alpha, wild-type b	Found in Sample: [S630] F630: Sample, alpha, wild-type b	Found in Sample: [S631] F631: Sample, precursor, wild-type b	Found in Sample: [S632] F632: Sample, precursor, wild-type b	Found in Sample: [S633] F633: Sample, beta, wild-type b	Found in Sample: [S634] F634: Sample, beta, wild-type b	Found in Sample: [S635] F635: Sample, alpha, wild-type a	Found in Sample: [S636] F636: Sample, precursor, wild-type a	Found in Sample: [S637] F637: Sample, beta, wild-type a	Found in Sample: [S643] F643: Sample, alpha, CCAB-6	Found in Sample: [S644] F644: Sample, alpha, CCAB-6
3218	1	1	1	6	[Master Protein] ACRE_090890	Not Found	Not Found	Not Found	Not Found	Not Found	Not Found	High	Not Found	Not Found	Not Found	Not Found	Not Found	Not Found	Not Found	Not Found	Not Found	Not Found	Not Found	Not Found	Not Found	Not Found	Not Found	Not Found	Not Found	Not Found	Not Found	Not Found	High	High	Not Found	Not Found	Not Found	Not Found	Not Found	Not Found	Not Found	High	High
Checked	Confidence	Identifying Node	PSM Ambiguity	Annotated Sequence	Modifications	# Proteins	Master Protein Accessions	Protein Accessions	# Missed Cleavages	Charge	DeltaScore	DeltaCn	Rank	Search Engine Rank	m/z [Da]	MH+ [Da]	Theo. MH+ [Da]	DeltaM [ppm]	Deltam/z [Da]	Activation Type	MS Order	Isolation Interference [%]	Ion Inject Time [ms]	RT [min]	First Scan	Spectrum File	File ID	XCorr	# Protein Groups
FALSE	High	Sequest HT (A2)	Unambiguous	LTFQQWLQR		1	ACRE_090890	ACRE_090890	0	2	0.4625	0	1	1	610.332	1219.66	1219.66	-1.5	-0.00091	CID (Collision Induced Dissociation)	MS2	41.2484	31.53	41.5914	9411	WT-2a.raw	F629	3.33	1
FALSE	High	Sequest HT (A2)	Unambiguous	LTFQQWLQR		1	ACRE_090890	ACRE_090890	0	2	0.5347	0	1	1	610.333	1219.66	1219.66	0.33	0.0002	CID (Collision Induced Dissociation)	MS2	54.7264	18.984	41.3781	12403	WT-2a2.raw	F630	3.31	1
FALSE	High	Sequest HT (A2)	Unambiguous	LTFQQWLQR		1	ACRE_090890	ACRE_090890	0	2	0.5246	0	1	1	610.333	1219.66	1219.66	-0.21	-0.00013	CID (Collision Induced Dissociation)	MS2	18.9283	75.111	46.0372	8415	CCAB-3a1.raw	F590	3.05	1
FALSE	High	Sequest HT (A2)	Unambiguous	LTFQQWLQR		1	ACRE_090890	ACRE_090890	0	2	0.5263	0	1	1	610.333	1219.66	1219.66	-0.21	-0.00013	CID (Collision Induced Dissociation)	MS2	6.11963	71.487	42.928	9471	CCAB-6a1.raw	F643	2.85	1
FALSE	High	Sequest HT (A2)	Unambiguous	LTFQQWLQR		1	ACRE_090890	ACRE_090890	0	2	0.4841	0	1	1	610.331	1219.66	1219.66	-2.37	-0.00144	CID (Collision Induced Dissociation)	MS2	62.9368	37.336	40.7948	9136	WT-2a.raw	F629	2.83	1
FALSE	High	Sequest HT (A2)	Unambiguous	LTFQQWLQR		1	ACRE_090890	ACRE_090890	0	2	0.5586	0	1	1	610.331	1219.65	1219.66	-3.59	-0.00219	CID (Collision Induced Dissociation)	MS2	1.10854	41.758	43.0332	9609	CCAB6-a2.raw	F644	2.56	1
ACRE_090880	ACRE_090880	13	1	1	1	205	22.9	10.43	3.68	1	Not Found	Not Found	Not Found	Not Found	Not Found	Not Found	Not Found	Not Found	Not Found	Not Found	Not Found	Not Found	Not Found	Not Found	Not Found	Not Found	Not Found	Not Found	Not Found	Not Found	Not Found	Not Found	High	Not Found	Not Found	Not Found	Not Found	Not Found	Not Found	Not Found	Not Found	Not Found	Not Found	Not Found	Not Found	Not Found	Not Found	Not Found	1
Protein Group ID	# Proteins	# Unique Peptides	# Peptides	# PSMs	Group Description	Found in Sample: [S578] F578: Sample, alpha, CCAB-1	Found in Sample: [S579] F579: Sample, precursor, CCAB-1	Found in Sample: [S580] F580: Sample, beta, CCAB-1	Found in Sample: [S587] F587: Sample, alpha, CCAB-2	Found in Sample: [S588] F588: Sample, beta, CCAB-2	Found in Sample: [S589] F589: Sample, beta, CCAB-2	Found in Sample: [S590] F590: Sample, alpha, CCAB-3	Found in Sample: [S591] F591: Sample, alpha, CCAB-3	Found in Sample: [S592] F592: Sample, alpha, CCAB-3	Found in Sample: [S593] F593: Sample, alpha, CCAB-3	Found in Sample: [S594] F594: Sample, alpha, CCAB-3	Found in Sample: [S595] F595: Sample, alpha, CCAB-3	Found in Sample: [S596] F596: Sample, alpha, CCAB-4	Found in Sample: [S597] F597: Sample, alpha, CCAB-4	Found in Sample: [S598] F598: Sample, alpha, CCAB-4	Found in Sample: [S599] F599: Sample, alpha, CCAB-4	Found in Sample: [S600] F600: Sample, alpha, CCAB-4	Found in Sample: [S601] F601: Sample, alpha, CCAB-4	Found in Sample: [S608] F608: Sample, alpha, CCAB-8	Found in Sample: [S609] F609: Sample, precursor, CCAB-8	Found in Sample: [S610] F610: Sample, beta, CCAB-8	Found in Sample: [S623] F623: Sample, alpha, CCAB-11	Found in Sample: [S624] F624: Sample, alpha, CCAB-11	Found in Sample: [S625] F625: Sample, precursor, CCAB-11	Found in Sample: [S626] F626: Sample, precursor, CCAB-11	Found in Sample: [S627] F627: Sample, beta, CCAB-11	Found in Sample: [S628] F628: Sample, beta, CCAB-11	Found in Sample: [S629] F629: Sample, alpha, wild-type b	Found in Sample: [S630] F630: Sample, alpha, wild-type b	Found in Sample: [S631] F631: Sample, precursor, wild-type b	Found in Sample: [S632] F632: Sample, precursor, wild-type b	Found in Sample: [S633] F633: Sample, beta, wild-type b	Found in Sample: [S634] F634: Sample, beta, wild-type b	Found in Sample: [S635] F635: Sample, alpha, wild-type a	Found in Sample: [S636] F636: Sample, precursor, wild-type a	Found in Sample: [S637] F637: Sample, beta, wild-type a	Found in Sample: [S643] F643: Sample, alpha, CCAB-6	Found in Sample: [S644] F644: Sample, alpha, CCAB-6
3039	1	1	1	1	[Master Protein] ACRE_090880	Not Found	Not Found	Not Found	Not Found	Not Found	Not Found	Not Found	Not Found	Not Found	Not Found	Not Found	Not Found	Not Found	Not Found	Not Found	Not Found	Not Found	Not Found	Not Found	Not Found	Not Found	Not Found	High	Not Found	Not Found	Not Found	Not Found	Not Found	Not Found	Not Found	Not Found	Not Found	Not Found	Not Found	Not Found	Not Found	Not Found	Not Found
Checked	Confidence	Identifying Node	PSM Ambiguity	Annotated Sequence	Modifications	# Proteins	Master Protein Accessions	Protein Accessions	# Missed Cleavages	Charge	DeltaScore	DeltaCn	Rank	Search Engine Rank	m/z [Da]	MH+ [Da]	Theo. MH+ [Da]	DeltaM [ppm]	Deltam/z [Da]	Activation Type	MS Order	Isolation Interference [%]	Ion Inject Time [ms]	RT [min]	First Scan	Spectrum File	File ID	XCorr	# Protein Groups
FALSE	High	Sequest HT (A2)	Unambiguous	LIGEQEDDKEPASAEVTTGDNTIDEAR		1	ACRE_090880	ACRE_090880	1	3	0.5516	0	1	1	968.449	2903.33	2903.34	-1.93	-0.00187	CID (Collision Induced Dissociation)	MS2	16.0895	27.164	31.6397	8359	CCAB-11a2.raw	F624	3.68	1
ACRE_090870	ACRE_090870	42	11	99	11	375	41.6	5.69	300.3	11	High	High	High	High	High	High	High	High	High	High	High	High	High	High	High	High	High	High	Not Found	Not Found	Not Found	High	High	Not Found	High	Not Found	Not Found	High	High	Not Found	Not Found	Not Found	High	High	High	High	Not Found	High	1
Protein Group ID	# Proteins	# Unique Peptides	# Peptides	# PSMs	Group Description	Found in Sample: [S578] F578: Sample, alpha, CCAB-1	Found in Sample: [S579] F579: Sample, precursor, CCAB-1	Found in Sample: [S580] F580: Sample, beta, CCAB-1	Found in Sample: [S587] F587: Sample, alpha, CCAB-2	Found in Sample: [S588] F588: Sample, beta, CCAB-2	Found in Sample: [S589] F589: Sample, beta, CCAB-2	Found in Sample: [S590] F590: Sample, alpha, CCAB-3	Found in Sample: [S591] F591: Sample, alpha, CCAB-3	Found in Sample: [S592] F592: Sample, alpha, CCAB-3	Found in Sample: [S593] F593: Sample, alpha, CCAB-3	Found in Sample: [S594] F594: Sample, alpha, CCAB-3	Found in Sample: [S595] F595: Sample, alpha, CCAB-3	Found in Sample: [S596] F596: Sample, alpha, CCAB-4	Found in Sample: [S597] F597: Sample, alpha, CCAB-4	Found in Sample: [S598] F598: Sample, alpha, CCAB-4	Found in Sample: [S599] F599: Sample, alpha, CCAB-4	Found in Sample: [S600] F600: Sample, alpha, CCAB-4	Found in Sample: [S601] F601: Sample, alpha, CCAB-4	Found in Sample: [S608] F608: Sample, alpha, CCAB-8	Found in Sample: [S609] F609: Sample, precursor, CCAB-8	Found in Sample: [S610] F610: Sample, beta, CCAB-8	Found in Sample: [S623] F623: Sample, alpha, CCAB-11	Found in Sample: [S624] F624: Sample, alpha, CCAB-11	Found in Sample: [S625] F625: Sample, precursor, CCAB-11	Found in Sample: [S626] F626: Sample, precursor, CCAB-11	Found in Sample: [S627] F627: Sample, beta, CCAB-11	Found in Sample: [S628] F628: Sample, beta, CCAB-11	Found in Sample: [S629] F629: Sample, alpha, wild-type b	Found in Sample: [S630] F630: Sample, alpha, wild-type b	Found in Sample: [S631] F631: Sample, precursor, wild-type b	Found in Sample: [S632] F632: Sample, precursor, wild-type b	Found in Sample: [S633] F633: Sample, beta, wild-type b	Found in Sample: [S634] F634: Sample, beta, wild-type b	Found in Sample: [S635] F635: Sample, alpha, wild-type a	Found in Sample: [S636] F636: Sample, precursor, wild-type a	Found in Sample: [S637] F637: Sample, beta, wild-type a	Found in Sample: [S643] F643: Sample, alpha, CCAB-6	Found in Sample: [S644] F644: Sample, alpha, CCAB-6
2326	1	11	11	99	[Master Protein] ACRE_090870	High	High	High	High	High	High	High	High	High	High	High	High	High	High	High	High	High	High	Not Found	Not Found	Not Found	High	High	Not Found	High	Not Found	Not Found	High	High	Not Found	Not Found	Not Found	High	High	High	High	Not Found	High
Checked	Confidence	Identifying Node	PSM Ambiguity	Annotated Sequence	Modifications	# Proteins	Master Protein Accessions	Protein Accessions	# Missed Cleavages	Charge	DeltaScore	DeltaCn	Rank	Search Engine Rank	m/z [Da]	MH+ [Da]	Theo. MH+ [Da]	DeltaM [ppm]	Deltam/z [Da]	Activation Type	MS Order	Isolation Interference [%]	Ion Inject Time [ms]	RT [min]	First Scan	Spectrum File	File ID	XCorr	# Protein Groups
FALSE	High	Sequest HT (A2)	Unambiguous	SYELPDGQVITIGNER		1	ACRE_090870	ACRE_090870	0	2	0.7562	0	1	1	895.951	1790.89	1790.89	1.24	0.00111	CID (Collision Induced Dissociation)	MS2	30.9172	24.633	39.8305	11987	CCAB-11a2.raw	F624	5.21	1
FALSE	High	Sequest HT (A2)	Unambiguous	YPIEHGVVTNWDDMEK		1	ACRE_090870	ACRE_090870	0	2	0.7573	0	1	1	966.946	1932.88	1932.88	2.14	0.00207	CID (Collision Induced Dissociation)	MS2	31.7147	68.819	35.8931	10293	CCAB-11a2.raw	F624	5.15	1
FALSE	High	Sequest HT (A2)	Unambiguous	TTGIVLDSGDGVTHVVPIYEGFALPHAIAR		1	ACRE_090870	ACRE_090870	0	4	0.5249	0	1	1	777.165	3105.64	3105.64	0.6	0.00046	CID (Collision Induced Dissociation)	MS2	62.9115	6.383	45.8767	14219	WT-2a2.raw	F630	4.61	1
FALSE	High	Sequest HT (A2)	Unambiguous	SYELPDGQVITIGNER		1	ACRE_090870	ACRE_090870	0	2	0.714	0	1	1	895.95	1790.89	1790.89	0.15	0.00013	CID (Collision Induced Dissociation)	MS2	20.5318	96.045	44.1782	9743	CCAB-3a1-2.raw	F591	4.58	1
FALSE	High	Sequest HT (A2)	Unambiguous	SYELPDGQVITIGNER		1	ACRE_090870	ACRE_090870	0	2	0.746	0	1	1	895.95	1790.89	1790.89	-0.1	-9e-05	CID (Collision Induced Dissociation)	MS2	12.164	113.687	44.1215	9291	CCAB-3a3-2.raw	F595	4.41	1
FALSE	High	Sequest HT (A2)	Unambiguous	SYELPDGQVITIGNER		1	ACRE_090870	ACRE_090870	0	2	0.7472	0	1	1	895.948	1790.89	1790.89	-1.83	-0.00164	CID (Collision Induced Dissociation)	MS2	9.87391	47.528	43.9954	7529	CCAB-3a3.raw	F594	4.39	1
FALSE	High	Sequest HT (A2)	Unambiguous	SYELPDGQVITIGNER		1	ACRE_090870	ACRE_090870	0	2	0.6944	0	1	1	895.948	1790.89	1790.89	-1.87	-0.00167	CID (Collision Induced Dissociation)	MS2	28.0711	150	43.9796	7642	CCAB-4a2.raw	F598	4.32	1
FALSE	High	Sequest HT (A2)	Unambiguous	TTGIVLDSGDGVTHVVPIYEGFALPHAIAR		1	ACRE_090870	ACRE_090870	0	4	0.5284	0	1	1	777.165	3105.64	3105.64	0.34	0.00026	CID (Collision Induced Dissociation)	MS2	32.8252	25.721	46.0097	14337	CCAB-11a2.raw	F624	4.22	1
FALSE	High	Sequest HT (A2)	Unambiguous	SYELPDGQVITIGNER		1	ACRE_090870	ACRE_090870	0	2	0.6643	0	1	1	895.949	1790.89	1790.89	-0.21	-0.00019	CID (Collision Induced Dissociation)	MS2	22.0359	22.643	39.729	11689	WT-2a2.raw	F630	4.2	1
FALSE	High	Sequest HT (A2)	Unambiguous	SYELPDGQVITIGNER		1	ACRE_090870	ACRE_090870	0	2	0.6914	0	1	1	895.951	1790.89	1790.89	1.12	0.001	CID (Collision Induced Dissociation)	MS2	22.8992	30.633	43.9059	9803	CCAB-4a2-2.raw	F599	4.18	1
FALSE	High	Sequest HT (A2)	Unambiguous	SYELPDGQVITIGNER		1	ACRE_090870	ACRE_090870	0	2	0.7129	0	1	1	895.95	1790.89	1790.89	0.81	0.00072	CID (Collision Induced Dissociation)	MS2	15.219	150	43.8837	7878	CCAB-3a1.raw	F590	4.18	1
FALSE	High	Sequest HT (A2)	Unambiguous	SYELPDGQVITIGNER		1	ACRE_090870	ACRE_090870	0	2	0.6923	0	1	1	895.948	1790.89	1790.89	-1.64	-0.00147	CID (Collision Induced Dissociation)	MS2	7.52365	102.497	44.153	8368	CCAB-4a1-2.raw	F597	4.16	1
FALSE	High	Sequest HT (A2)	Unambiguous	SYELPDGQVITIGNER		1	ACRE_090870	ACRE_090870	0	2	0.6618	0	1	1	895.948	1790.89	1790.89	-1.29	-0.00116	CID (Collision Induced Dissociation)	MS2	31.4702	150	44.0967	7077	CCAB-4a1.raw	F596	4.08	1
FALSE	High	Sequest HT (A2)	Unambiguous	SYELPDGQVITIGNER		1	ACRE_090870	ACRE_090870	0	2	0.6108	0	1	1	895.948	1790.89	1790.89	-1.87	-0.00167	CID (Collision Induced Dissociation)	MS2	12.5048	47.208	39.2647	8594	WT-2a.raw	F629	4.06	1
FALSE	High	Sequest HT (A2)	Unambiguous	VAPEEHPVLLTEAPINPK		1	ACRE_090870	ACRE_090870	0	2	0.758	0	1	1	977.536	1954.07	1954.06	0.35	0.00035	CID (Collision Induced Dissociation)	MS2	24.4914	19.379	36.2424	10160	WT-2a2.raw	F630	4.05	1
FALSE	High	Sequest HT (A2)	Unambiguous	SYELPDGQVITIGNER		1	ACRE_090870	ACRE_090870	0	2	0.6625	0	1	1	895.947	1790.89	1790.89	-2.82	-0.00252	CID (Collision Induced Dissociation)	MS2	0	52.323	44.0069	9417	CCAB-2a3-2.raw	F587	4.03	1
FALSE	High	Sequest HT (A2)	Unambiguous	SYELPDGQVITIGNER		1	ACRE_090870	ACRE_090870	0	2	0.6933	0	1	1	895.948	1790.89	1790.89	-2.06	-0.00185	CID (Collision Induced Dissociation)	MS2	17.0384	121.513	44.2804	8885	CCAB-3a2-2.raw	F593	3.88	1
FALSE	High	Sequest HT (A2)	Unambiguous	SYELPDGQVITIGNER		1	ACRE_090870	ACRE_090870	0	2	0.6684	0	1	1	895.948	1790.89	1790.89	-1.28	-0.00114	CID (Collision Induced Dissociation)	MS2	34.0092	150	38.1652	7689	WT-b.raw	F637	3.77	1
FALSE	High	Sequest HT (A2)	Unambiguous	SYELPDGQVITIGNER		1	ACRE_090870	ACRE_090870	0	2	0.6595	0	1	1	895.948	1790.89	1790.89	-1.74	-0.00156	CID (Collision Induced Dissociation)	MS2	25.144	150	38.914	5864	CCAB-1a.raw	F578	3.73	1
FALSE	High	Sequest HT (A2)	Unambiguous	VAPEEHPVLLTEAPINPK		1	ACRE_090870	ACRE_090870	0	2	0.6919	0	1	1	977.535	1954.06	1954.06	-0.39	-0.00038	CID (Collision Induced Dissociation)	MS2	15.7747	30.864	36.3226	10485	CCAB-11a2.raw	F624	3.7	1
FALSE	High	Sequest HT (A2)	Unambiguous	DLYGNIVmSGGTTmYPGLSDR	M8(Oxidation); M14(Oxidation)	1	ACRE_090870	ACRE_090870	0	3	0.5546	0	1	1	760.349	2279.03	2279.03	0.71	0.00054	CID (Collision Induced Dissociation)	MS2	44.9978	150	43.3542	7369	CCAB-3a3.raw	F594	3.66	1
FALSE	High	Sequest HT (A2)	Unambiguous	VAPEEHPVLLTEAPINPK		1	ACRE_090870	ACRE_090870	0	3	0.459	0	1	1	652.026	1954.06	1954.06	-1.11	-0.00072	CID (Collision Induced Dissociation)	MS2	17.3328	9.974	41.1398	8708	CCAB-3a1-2.raw	F591	3.66	1
FALSE	High	Sequest HT (A2)	Unambiguous	VAPEEHPVLLTEAPINPK		1	ACRE_090870	ACRE_090870	0	3	0.6028	0	1	1	652.026	1954.06	1954.06	-1.02	-0.00066	CID (Collision Induced Dissociation)	MS2	45.6278	17.026	36.2246	10441	CCAB-11a2.raw	F624	3.6	1
FALSE	High	Sequest HT (A2)	Unambiguous	VAPEEHPVLLTEAPINPK		1	ACRE_090870	ACRE_090870	0	3	0.6239	0	1	1	652.027	1954.07	1954.06	0.84	0.00055	CID (Collision Induced Dissociation)	MS2	77.2228	67.739	41.2462	7504	CCAB-4a1-2.raw	F597	3.51	1
FALSE	High	Sequest HT (A2)	Unambiguous	SYELPDGQVITIGNER		1	ACRE_090870	ACRE_090870	0	2	0.6725	0	1	1	895.95	1790.89	1790.89	0.7	0.00063	CID (Collision Induced Dissociation)	MS2	24.7848	150	44.2325	7375	CCAB-3a2.raw	F592	3.42	1
FALSE	High	Sequest HT (A2)	Unambiguous	VAPEEHPVLLTEAPINPK		1	ACRE_090870	ACRE_090870	0	3	0.5588	0	1	1	652.026	1954.06	1954.06	-1.06	-0.00069	CID (Collision Induced Dissociation)	MS2	23.4295	22.746	41.2832	8341	CCAB-3a3-2.raw	F595	3.4	1
FALSE	High	Sequest HT (A2)	Unambiguous	SYELPDGQVITIGNER		1	ACRE_090870	ACRE_090870	0	2	0.6156	0	1	1	895.95	1790.89	1790.89	0.16	0.00014	CID (Collision Induced Dissociation)	MS2	20.3372	95.401	44.4621	9397	CCAB-3a3-2.raw	F595	3.33	1
FALSE	High	Sequest HT (A2)	Unambiguous	VAPEEHPVLLTEAPINPK		1	ACRE_090870	ACRE_090870	0	3	0.6455	0	1	1	652.027	1954.07	1954.06	1.07	0.0007	CID (Collision Induced Dissociation)	MS2	22.7165	144.636	40.92	6565	CCAB-3a2.raw	F592	3.3	1
FALSE	High	Sequest HT (A2)	Unambiguous	VAPEEHPVLLTEAPINPK		1	ACRE_090870	ACRE_090870	0	3	0.6636	0	1	1	652.026	1954.06	1954.06	-0.66	-0.00043	CID (Collision Induced Dissociation)	MS2	13.5692	72.833	40.8919	6288	CCAB-4a1.raw	F596	3.27	1
FALSE	High	Sequest HT (A2)	Unambiguous	QEYDESGPSIVHR		1	ACRE_090870	ACRE_090870	0	2	0.7699	0	1	1	758.855	1516.7	1516.7	-0.42	-0.00032	CID (Collision Induced Dissociation)	MS2	37.1501	150	30.3765	3002	CCAB-4a3.raw	F600	3.26	1
FALSE	High	Sequest HT (A2)	Unambiguous	VAPEEHPVLLTEAPINPK		1	ACRE_090870	ACRE_090870	0	3	0.4875	0	1	1	652.026	1954.06	1954.06	-0.47	-0.00031	CID (Collision Induced Dissociation)	MS2	7.02748	7.883	41.0002	8757	CCAB-4a2-2.raw	F599	3.2	1
FALSE	High	Sequest HT (A2)	Unambiguous	VAPEEHPVLLTEAPINPK		1	ACRE_090870	ACRE_090870	0	3	0.5875	0	1	1	652.026	1954.06	1954.06	0.15	0.0001	CID (Collision Induced Dissociation)	MS2	6.94977	3.206	36.1696	10124	WT-2a2.raw	F630	3.2	1
FALSE	High	Sequest HT (A2)	Unambiguous	VAPEEHPVLLTEAPINPK		1	ACRE_090870	ACRE_090870	0	3	0.6063	0	1	1	652.027	1954.07	1954.06	0.63	0.00041	CID (Collision Induced Dissociation)	MS2	6.09169	25.325	40.862	6820	CCAB-4a2.raw	F598	3.15	1
FALSE	High	Sequest HT (A2)	Unambiguous	VAPEEHPVLLTEAPINPK		1	ACRE_090870	ACRE_090870	0	3	0.4841	0	1	1	652.025	1954.06	1954.06	-1.96	-0.00128	CID (Collision Induced Dissociation)	MS2	40.7311	56.723	41.3327	8006	CCAB-3a2-2.raw	F593	3.14	1
FALSE	High	Sequest HT (A2)	Unambiguous	VAPEEHPVLLTEAPINPK		1	ACRE_090870	ACRE_090870	0	3	0.6975	0	1	1	652.026	1954.06	1954.06	-0.11	-7e-05	CID (Collision Induced Dissociation)	MS2	71.0161	135.093	33.2236	6255	CCAB-1b.raw	F580	3.14	1
FALSE	High	Sequest HT (A2)	Unambiguous	SYELPDGQVITIGNER		1	ACRE_090870	ACRE_090870	0	2	0.5981	0	1	1	895.95	1790.89	1790.89	-0.08	-7e-05	CID (Collision Induced Dissociation)	MS2	16.1087	150	41.1668	9069	CCAB6-a2.raw	F644	3.11	1
FALSE	High	Sequest HT (A2)	Unambiguous	QEYDESGPSIVHR		1	ACRE_090870	ACRE_090870	0	3	0.5691	0	1	1	506.238	1516.7	1516.7	-1.41	-0.00071	CID (Collision Induced Dissociation)	MS2	57.952	133.081	24.9415	4025	CCAB-1b.raw	F580	3.11	1
FALSE	High	Sequest HT (A2)	Unambiguous	TTGIVLDSGDGVTHVVPIYEGFALPHAIAR		1	ACRE_090870	ACRE_090870	0	4	0.5	0	1	1	777.165	3105.64	3105.64	0.7	0.00055	CID (Collision Induced Dissociation)	MS2	23.1829	19.044	46.0785	14820	WT-2b2.raw	F634	3.06	1
FALSE	High	Sequest HT (A2)	Unambiguous	SYELPDGQVITIGNER		1	ACRE_090870	ACRE_090870	0	2	0.598	0	1	1	895.949	1790.89	1790.89	-0.77	-0.00069	CID (Collision Induced Dissociation)	MS2	58.6335	150	44.2651	6319	CCAB-4a3.raw	F600	3.06	1
FALSE	High	Sequest HT (A2)	Unambiguous	SYELPDGQVITIGNER		1	ACRE_090870	ACRE_090870	0	2	0.5987	0	1	1	895.948	1790.89	1790.89	-1.34	-0.0012	CID (Collision Induced Dissociation)	MS2	46.352	150	43.8465	7858	CCAB-4a3-2.raw	F601	3.04	1
FALSE	High	Sequest HT (A2)	Unambiguous	SYELPDGQVITIGNER		1	ACRE_090870	ACRE_090870	0	3	0.4286	0	1	1	597.637	1790.9	1790.89	2.33	0.00139	CID (Collision Induced Dissociation)	MS2	45.6156	127.875	44.1073	7676	CCAB-4a2.raw	F598	3.01	1
FALSE	High	Sequest HT (A2)	Unambiguous	VAPEEHPVLLTEAPINPK		1	ACRE_090870	ACRE_090870	0	3	0.4833	0	1	1	652.027	1954.07	1954.06	0.38	0.00025	CID (Collision Induced Dissociation)	MS2	27.2953	54.547	33.909	6084	WT-ab.raw	F636	3	1
FALSE	High	Sequest HT (A2)	Unambiguous	DSYVGDEAQSK		1	ACRE_090870	ACRE_090870	0	2	0.6233	0	1	1	599.763	1198.52	1198.52	-3.73	-0.00224	CID (Collision Induced Dissociation)	MS2	79.852	150	22.2047	2747	CCAB-11ab2.raw	F626	3	1
FALSE	High	Sequest HT (A2)	Unambiguous	QEYDESGPSIVHR		1	ACRE_090870	ACRE_090870	0	2	0.7407	0	1	1	758.853	1516.7	1516.7	-2.54	-0.00193	CID (Collision Induced Dissociation)	MS2	34.0127	77.989	30.1664	4405	CCAB-3a3-2.raw	F595	2.97	1
FALSE	High	Sequest HT (A2)	Unambiguous	QEYDESGPSIVHR		1	ACRE_090870	ACRE_090870	0	2	0.7687	0	1	1	758.853	1516.7	1516.7	-2.32	-0.00176	CID (Collision Induced Dissociation)	MS2	19.932	135.807	30.3342	3837	CCAB-3a3.raw	F594	2.94	1
FALSE	High	Sequest HT (A2)	Unambiguous	VAPEEHPVLLTEAPINPK		1	ACRE_090870	ACRE_090870	0	3	0.4762	0	1	1	652.026	1954.06	1954.06	-0.05	-3e-05	CID (Collision Induced Dissociation)	MS2	11.6155	30.724	40.7031	7033	CCAB-3a1.raw	F590	2.94	1
FALSE	High	Sequest HT (A2)	Unambiguous	QEYDESGPSIVHR		1	ACRE_090870	ACRE_090870	0	3	0.4467	0	1	1	506.239	1516.7	1516.7	0.58	0.00029	CID (Collision Induced Dissociation)	MS2	33.4042	7.318	27.1309	6254	CCAB-11a2.raw	F624	2.91	1
FALSE	High	Sequest HT (A2)	Unambiguous	VAPEEHPVLLTEAPINPK		1	ACRE_090870	ACRE_090870	0	3	0.5052	0	1	1	652.026	1954.06	1954.06	-0.18	-0.00012	CID (Collision Induced Dissociation)	MS2	45.2685	60.628	33.5535	6441	WT-b.raw	F637	2.89	1
FALSE	High	Sequest HT (A2)	Unambiguous	VAPEEHPVLLTEAPINPK		1	ACRE_090870	ACRE_090870	0	3	0.4757	0	1	1	652.027	1954.07	1954.06	0.76	0.0005	CID (Collision Induced Dissociation)	MS2	77.3631	43.864	35.7627	6935	CCAB-11a.raw	F623	2.88	1
FALSE	High	Sequest HT (A2)	Unambiguous	SYELPDGQVITIGNER		1	ACRE_090870	ACRE_090870	0	2	0.5246	0	1	1	895.949	1790.89	1790.89	-1.08	-0.00096	CID (Collision Induced Dissociation)	MS2	53.1541	105.487	42.4183	9293	CCAB-4a2-2.raw	F599	2.84	1
FALSE	High	Sequest HT (A2)	Unambiguous	VAPEEHPVLLTEAPINPK		1	ACRE_090870	ACRE_090870	0	3	0.5352	0	1	1	652.026	1954.06	1954.06	-0.4	-0.00026	CID (Collision Induced Dissociation)	MS2	10.8774	9.627	35.7245	7265	WT-2a.raw	F629	2.84	1
FALSE	High	Sequest HT (A2)	Unambiguous	EITALAPSSmK	M10(Oxidation)	1	ACRE_090870	ACRE_090870	0	2	0.5269	0	1	1	582.303	1163.6	1163.6	0.75	0.00044	CID (Collision Induced Dissociation)	MS2	8.93806	25.433	31.5041	4143	CCAB-3a3.raw	F594	2.79	1
FALSE	High	Sequest HT (A2)	Unambiguous	GYTFSTTAER		1	ACRE_090870	ACRE_090870	0	2	0.5632	0	1	1	566.767	1132.53	1132.53	-0.03	-2e-05	CID (Collision Induced Dissociation)	MS2	23.8785	150	31.51	3892	CCAB-4a1.raw	F596	2.77	1
FALSE	High	Sequest HT (A2)	Unambiguous	QEYDESGPSIVHR		1	ACRE_090870	ACRE_090870	0	2	0.7148	0	1	1	758.855	1516.7	1516.7	-0.08	-6e-05	CID (Collision Induced Dissociation)	MS2	16.8529	150	29.8571	3805	CCAB-4a3-2.raw	F601	2.77	1
FALSE	High	Sequest HT (A2)	Unambiguous	DSYVGDEAQSKR		1	ACRE_090870	ACRE_090870	1	2	0.6496	0	1	1	677.815	1354.62	1354.62	-0.63	-0.00043	CID (Collision Induced Dissociation)	MS2	8.47697	150	21.3358	3903	CCAB-11a2.raw	F624	2.74	1
FALSE	High	Sequest HT (A2)	Unambiguous	AGFAGDDAPR		1	ACRE_090870	ACRE_090870	0	2	0.3542	0	1	1	488.727	976.446	976.448	-2.26	-0.0011	CID (Collision Induced Dissociation)	MS2	78.0403	150	24.7396	2302	CCAB-1a.raw	F578	2.71	1
FALSE	High	Sequest HT (A2)	Unambiguous	QEYDESGPSIVHR		1	ACRE_090870	ACRE_090870	0	3	0.5242	0	1	1	506.239	1516.7	1516.7	0.83	0.00042	CID (Collision Induced Dissociation)	MS2	12.0366	43.375	30.1877	3798	CCAB-3a3.raw	F594	2.69	1
FALSE	High	Sequest HT (A2)	Unambiguous	VAPEEHPVLLTEAPINPK		1	ACRE_090870	ACRE_090870	0	3	0.4981	0	1	1	652.026	1954.06	1954.06	-0.26	-0.00017	CID (Collision Induced Dissociation)	MS2	50.8299	143.215	35.4298	4998	CCAB-1a.raw	F578	2.69	1
FALSE	High	Sequest HT (A2)	Unambiguous	EITALAPSSmK	M10(Oxidation)	1	ACRE_090870	ACRE_090870	0	2	0.5677	0	1	1	582.303	1163.6	1163.6	0.65	0.00038	CID (Collision Induced Dissociation)	MS2	46.8188	13.943	30.8365	4730	CCAB-2a3-2.raw	F587	2.66	1
FALSE	High	Sequest HT (A2)	Unambiguous	EITALAPSSmK	M10(Oxidation)	1	ACRE_090870	ACRE_090870	0	2	0.5611	0	1	1	582.303	1163.6	1163.6	0.33	0.00019	CID (Collision Induced Dissociation)	MS2	16.1541	122.956	31.6033	3295	CCAB-4a3.raw	F600	2.62	1
FALSE	High	Sequest HT (A2)	Unambiguous	QEYDESGPSIVHR		1	ACRE_090870	ACRE_090870	0	2	0.655	0	1	1	758.855	1516.7	1516.7	0.24	0.00018	CID (Collision Induced Dissociation)	MS2	73.3284	150	30.1255	4002	CCAB-3a1.raw	F590	2.58	1
FALSE	High	Sequest HT (A2)	Unambiguous	EITALAPSSmK	M10(Oxidation)	1	ACRE_090870	ACRE_090870	0	2	0.4258	0	1	1	582.302	1163.6	1163.6	-0.95	-0.00055	CID (Collision Induced Dissociation)	MS2	30.8786	24.189	31.1425	4718	CCAB-3a3-2.raw	F595	2.56	1
FALSE	High	Sequest HT (A2)	Unambiguous	EITALAPSSMK		1	ACRE_090870	ACRE_090870	0	2	0.5156	0	1	1	574.305	1147.6	1147.6	0.34	0.0002	CID (Collision Induced Dissociation)	MS2	10.5459	24.558	36.1259	5428	CCAB-3a3.raw	F594	2.56	1
FALSE	High	Sequest HT (A2)	Unambiguous	AGFAGDDAPR		1	ACRE_090870	ACRE_090870	0	2	0.5278	0	1	1	488.728	976.449	976.448	1.05	0.00051	CID (Collision Induced Dissociation)	MS2	54.5832	15.42	24.3623	4711	WT-2a2.raw	F630	2.52	1
FALSE	High	Sequest HT (A2)	Unambiguous	QEYDESGPSIVHR		1	ACRE_090870	ACRE_090870	0	2	0.5595	0	1	1	758.854	1516.7	1516.7	-1.55	-0.00118	CID (Collision Induced Dissociation)	MS2	24.4591	103.269	29.8882	4430	CCAB-2a3-2.raw	F587	2.52	1
FALSE	High	Sequest HT (A2)	Unambiguous	QEYDESGPSIVHR		1	ACRE_090870	ACRE_090870	0	3	0.5754	0	1	1	506.24	1516.7	1516.7	1.23	0.00062	CID (Collision Induced Dissociation)	MS2	73.7745	138.583	25.3144	4135	WT-a.raw	F635	2.52	1
FALSE	High	Sequest HT (A2)	Unambiguous	QEYDESGPSIVHR		1	ACRE_090870	ACRE_090870	0	2	0.631	0	1	1	758.856	1516.7	1516.7	1.45	0.0011	CID (Collision Induced Dissociation)	MS2	82.9953	150	30.2114	4773	CCAB-3a1-2.raw	F591	2.52	1
FALSE	High	Sequest HT (A2)	Unambiguous	QEYDESGPSIVHR		1	ACRE_090870	ACRE_090870	0	3	0.5259	0	1	1	506.239	1516.7	1516.7	0.37	0.00019	CID (Collision Induced Dissociation)	MS2	49.7219	131.602	25.3479	4182	WT-b.raw	F637	2.51	1
FALSE	High	Sequest HT (A2)	Unambiguous	SYELPDGQVITIGNER		1	ACRE_090870	ACRE_090870	0	2	0.3546	0	1	1	895.954	1790.9	1790.89	5.01	0.00448	CID (Collision Induced Dissociation)	MS2	0	150	42.6544	8817	CCAB-3a3-2.raw	F595	2.51	1
FALSE	High	Sequest HT (A2)	Unambiguous	DSYVGDEAQSKR		1	ACRE_090870	ACRE_090870	1	3	0.444	0	1	1	452.213	1354.62	1354.62	0.03	1e-05	CID (Collision Induced Dissociation)	MS2	35.1354	43.097	21.3131	3638	WT-2a2.raw	F630	2.5	1
FALSE	High	Sequest HT (A2)	Unambiguous	SYELPDGQVITIGNER		1	ACRE_090870	ACRE_090870	0	2	0.6411	0	1	1	895.948	1790.89	1790.89	-2.05	-0.00183	CID (Collision Induced Dissociation)	MS2	40.0135	11.705	44.0397	10920	CCAB-2b-2.raw	F589	2.48	1
FALSE	High	Sequest HT (A2)	Unambiguous	VAPEEHPVLLTEAPINPK		1	ACRE_090870	ACRE_090870	0	3	0.587	0	1	1	652.027	1954.07	1954.06	0.41	0.00027	CID (Collision Induced Dissociation)	MS2	50.2762	128.865	33.7195	6288	WT-a.raw	F635	2.47	1
FALSE	High	Sequest HT (A2)	Unambiguous	EITALAPSSmK	M10(Oxidation)	1	ACRE_090870	ACRE_090870	0	2	0.4211	0	1	1	582.302	1163.6	1163.6	-0.46	-0.00027	CID (Collision Induced Dissociation)	MS2	36.8245	150	33.7263	3806	CCAB-4a3.raw	F600	2.47	1
FALSE	High	Sequest HT (A2)	Unambiguous	QEYDESGPSIVHR		1	ACRE_090870	ACRE_090870	0	3	0.5772	0	1	1	506.238	1516.7	1516.7	-2.05	-0.00103	CID (Collision Induced Dissociation)	MS2	44.8944	26.508	30.1086	4385	CCAB-3a3-2.raw	F595	2.46	1
FALSE	High	Sequest HT (A2)	Unambiguous	QEYDESGPSIVHR		1	ACRE_090870	ACRE_090870	0	3	0.4268	0	1	1	506.24	1516.71	1516.7	2.28	0.00115	CID (Collision Induced Dissociation)	MS2	51.938	58.269	29.8959	4100	CCAB-2b.raw	F588	2.46	1
FALSE	High	Sequest HT (A2)	Unambiguous	EITALAPSSmK	M10(Oxidation)	1	ACRE_090870	ACRE_090870	0	2	0.4634	0	1	1	582.302	1163.6	1163.6	-1.14	-0.00066	CID (Collision Induced Dissociation)	MS2	60.6901	57.263	34.2669	5815	CCAB-3a3-2.raw	F595	2.46	1
FALSE	High	Sequest HT (A2)	Unambiguous	QEYDESGPSIVHR		1	ACRE_090870	ACRE_090870	0	3	0.3498	0	1	1	506.24	1516.71	1516.7	1.7	0.00086	CID (Collision Induced Dissociation)	MS2	57.2205	150	28.7207	3278	CCAB-1a.raw	F578	2.43	1
FALSE	High	Sequest HT (A2)	Unambiguous	EITALAPSSmK	M10(Oxidation)	1	ACRE_090870	ACRE_090870	0	2	0.4938	0	1	1	582.303	1163.6	1163.6	0.45	0.00026	CID (Collision Induced Dissociation)	MS2	40.5043	20.489	30.9636	4947	CCAB-4a2-2.raw	F599	2.43	1
FALSE	High	Sequest HT (A2)	Unambiguous	VAPEEHPVLLTEAPINPK		1	ACRE_090870	ACRE_090870	0	3	0.3471	0	1	1	652.025	1954.06	1954.06	-1.35	-0.00088	CID (Collision Induced Dissociation)	MS2	37.4162	46.744	41.1927	8439	CCAB-2a3-2.raw	F587	2.42	1
FALSE	High	Sequest HT (A2)	Unambiguous	QEYDESGPSIVHR		1	ACRE_090870	ACRE_090870	0	3	0.4689	0	1	1	506.239	1516.7	1516.7	0.79	0.0004	CID (Collision Induced Dissociation)	MS2	23.8252	39.967	29.8172	3794	CCAB-4a3-2.raw	F601	2.41	1
FALSE	High	Sequest HT (A2)	Unambiguous	SYELPDGQVITIGNER		1	ACRE_090870	ACRE_090870	0	2	0.5975	0	1	1	895.949	1790.89	1790.89	-0.82	-0.00073	CID (Collision Induced Dissociation)	MS2	42.8516	150	37.8847	7475	CCAB-1b.raw	F580	2.41	1
FALSE	High	Sequest HT (A2)	Unambiguous	SYELPDGQVITIGNER		1	ACRE_090870	ACRE_090870	0	3	0.444	0	1	1	597.636	1790.89	1790.89	1.08	0.00064	CID (Collision Induced Dissociation)	MS2	65.2805	53.285	43.9225	9810	CCAB-4a2-2.raw	F599	2.41	1
FALSE	High	Sequest HT (A2)	Unambiguous	QEYDESGPSIVHR		1	ACRE_090870	ACRE_090870	0	3	0.4583	0	1	1	506.239	1516.7	1516.7	-0.2	-0.0001	CID (Collision Induced Dissociation)	MS2	36.6752	55.56	30.2883	4400	CCAB-3a2-2.raw	F593	2.4	1
FALSE	High	Sequest HT (A2)	Unambiguous	AGFAGDDAPR		1	ACRE_090870	ACRE_090870	0	2	0.5481	0	1	1	488.728	976.449	976.448	0.81	0.0004	CID (Collision Induced Dissociation)	MS2	44.8903	5.79	24.3754	5007	CCAB-11a2.raw	F624	2.39	1
FALSE	High	Sequest HT (A2)	Unambiguous	EITALAPSSmK	M10(Oxidation)	1	ACRE_090870	ACRE_090870	0	2	0.41	0	1	1	582.303	1163.6	1163.6	0.08	5e-05	CID (Collision Induced Dissociation)	MS2	65.4126	44.639	30.6899	4042	CCAB-4a3-2.raw	F601	2.39	1
FALSE	High	Sequest HT (A2)	Unambiguous	GYTFSTTAER		1	ACRE_090870	ACRE_090870	0	2	0.5732	0	1	1	566.767	1132.53	1132.53	0.34	0.00019	CID (Collision Induced Dissociation)	MS2	65.431	150	31.8113	4290	CCAB-4a2.raw	F598	2.39	1
FALSE	High	Sequest HT (A2)	Unambiguous	SYELPDGQVITIGNER		1	ACRE_090870	ACRE_090870	0	3	0.4599	0	1	1	597.636	1790.89	1790.89	0.38	0.00023	CID (Collision Induced Dissociation)	MS2	44.2292	20.655	39.8727	12004	CCAB-11a2.raw	F624	2.37	1
FALSE	High	Sequest HT (A2)	Unambiguous	DSYVGDEAQSKR		1	ACRE_090870	ACRE_090870	1	2	0.5726	0	1	1	677.817	1354.63	1354.62	2.77	0.00188	CID (Collision Induced Dissociation)	MS2	27.2991	150	21.4215	3670	WT-2a2.raw	F630	2.34	1
FALSE	High	Sequest HT (A2)	Unambiguous	GYTFSTTAER		1	ACRE_090870	ACRE_090870	0	2	0.5947	0	1	1	566.765	1132.52	1132.53	-4.01	-0.00227	CID (Collision Induced Dissociation)	MS2	66.9651	89.052	27.4403	4015	CCAB-11a.raw	F623	2.27	1
FALSE	High	Sequest HT (A2)	Unambiguous	EITALAPSSMK		1	ACRE_090870	ACRE_090870	0	2	0.5771	0	1	1	574.306	1147.6	1147.6	1.32	0.00076	CID (Collision Induced Dissociation)	MS2	46.529	150	36.2395	4417	CCAB-4a3.raw	F600	2.27	1
FALSE	High	Sequest HT (A2)	Unambiguous	EITALAPSSmK	M10(Oxidation)	1	ACRE_090870	ACRE_090870	0	2	0.2168	0	1	1	582.302	1163.6	1163.6	-1.57	-0.00091	CID (Collision Induced Dissociation)	MS2	72.8777	150	34.285	4912	CCAB-3a3.raw	F594	2.26	1
FALSE	High	Sequest HT (A2)	Unambiguous	AGFAGDDAPR		1	ACRE_090870	ACRE_090870	0	2	0.4336	0	1	1	488.73	976.453	976.448	4.34	0.00212	CID (Collision Induced Dissociation)	MS2	88.5246	150	15.1532	1966	WT-a.raw	F635	2.26	1
FALSE	High	Sequest HT (A2)	Unambiguous	EITALAPSSmK	M10(Oxidation)	1	ACRE_090870	ACRE_090870	0	2	0.2667	0	1	1	582.302	1163.6	1163.6	-1.66	-0.00096	CID (Collision Induced Dissociation)	MS2	34.6118	85.192	31.7197	4263	CCAB-4a2.raw	F598	2.25	1
FALSE	High	Sequest HT (A2)	Unambiguous	AGFAGDDAPR		1	ACRE_090870	ACRE_090870	0	2	0.2986	0	1	1	488.728	976.448	976.448	0.21	0.0001	CID (Collision Induced Dissociation)	MS2	77.5538	150	26.4673	2099	CCAB-1ab.raw	F579	2.21	1
FALSE	High	Sequest HT (A2)	Unambiguous	AGFAGDDAPR		1	ACRE_090870	ACRE_090870	0	2	0.3486	0	1	1	488.728	976.448	976.448	-0.36	-0.00017	CID (Collision Induced Dissociation)	MS2	48.8752	150	11.7127	1455	WT-a.raw	F635	2.18	1
FALSE	High	Sequest HT (A2)	Unambiguous	EITALAPSSMK		1	ACRE_090870	ACRE_090870	0	2	0.463	0	1	1	574.305	1147.6	1147.6	0.07	4e-05	CID (Collision Induced Dissociation)	MS2	23.0237	11.993	36.0628	6472	CCAB-3a3-2.raw	F595	2.16	1
FALSE	High	Sequest HT (A2)	Unambiguous	GYTFSTTAER		1	ACRE_090870	ACRE_090870	0	2	0.5514	0	1	1	566.768	1132.53	1132.53	2.45	0.00139	CID (Collision Induced Dissociation)	MS2	41.4796	150	30.7092	4049	CCAB-4a3-2.raw	F601	2.14	1
FALSE	High	Sequest HT (A2)	Unambiguous	AGFAGDDAPR		1	ACRE_090870	ACRE_090870	0	2	0.3649	0	1	1	488.727	976.448	976.448	-0.7	-0.00034	CID (Collision Induced Dissociation)	MS2	68.6369	150	23.8418	2110	CCAB-1a.raw	F578	2.11	1
FALSE	High	Sequest HT (A2)	Unambiguous	GYTFSTTAER		1	ACRE_090870	ACRE_090870	0	2	0.4882	0	1	1	566.767	1132.53	1132.53	0.22	0.00013	CID (Collision Induced Dissociation)	MS2	50.8743	70.402	31.0307	4501	CCAB-2b.raw	F588	2.11	1
ACRE_090840	ACRE_090840	13	3	14	3	215	23.7	4.83	39.28	3	Not Found	Not Found	Not Found	Not Found	Not Found	Not Found	High	High	Not Found	Not Found	Not Found	Not Found	High	High	Not Found	Not Found	Not Found	Not Found	Not Found	Not Found	Not Found	High	High	Not Found	Not Found	Not Found	Not Found	High	High	Not Found	Not Found	Not Found	Not Found	Not Found	Not Found	Not Found	Not Found	High	1
Protein Group ID	# Proteins	# Unique Peptides	# Peptides	# PSMs	Group Description	Found in Sample: [S578] F578: Sample, alpha, CCAB-1	Found in Sample: [S579] F579: Sample, precursor, CCAB-1	Found in Sample: [S580] F580: Sample, beta, CCAB-1	Found in Sample: [S587] F587: Sample, alpha, CCAB-2	Found in Sample: [S588] F588: Sample, beta, CCAB-2	Found in Sample: [S589] F589: Sample, beta, CCAB-2	Found in Sample: [S590] F590: Sample, alpha, CCAB-3	Found in Sample: [S591] F591: Sample, alpha, CCAB-3	Found in Sample: [S592] F592: Sample, alpha, CCAB-3	Found in Sample: [S593] F593: Sample, alpha, CCAB-3	Found in Sample: [S594] F594: Sample, alpha, CCAB-3	Found in Sample: [S595] F595: Sample, alpha, CCAB-3	Found in Sample: [S596] F596: Sample, alpha, CCAB-4	Found in Sample: [S597] F597: Sample, alpha, CCAB-4	Found in Sample: [S598] F598: Sample, alpha, CCAB-4	Found in Sample: [S599] F599: Sample, alpha, CCAB-4	Found in Sample: [S600] F600: Sample, alpha, CCAB-4	Found in Sample: [S601] F601: Sample, alpha, CCAB-4	Found in Sample: [S608] F608: Sample, alpha, CCAB-8	Found in Sample: [S609] F609: Sample, precursor, CCAB-8	Found in Sample: [S610] F610: Sample, beta, CCAB-8	Found in Sample: [S623] F623: Sample, alpha, CCAB-11	Found in Sample: [S624] F624: Sample, alpha, CCAB-11	Found in Sample: [S625] F625: Sample, precursor, CCAB-11	Found in Sample: [S626] F626: Sample, precursor, CCAB-11	Found in Sample: [S627] F627: Sample, beta, CCAB-11	Found in Sample: [S628] F628: Sample, beta, CCAB-11	Found in Sample: [S629] F629: Sample, alpha, wild-type b	Found in Sample: [S630] F630: Sample, alpha, wild-type b	Found in Sample: [S631] F631: Sample, precursor, wild-type b	Found in Sample: [S632] F632: Sample, precursor, wild-type b	Found in Sample: [S633] F633: Sample, beta, wild-type b	Found in Sample: [S634] F634: Sample, beta, wild-type b	Found in Sample: [S635] F635: Sample, alpha, wild-type a	Found in Sample: [S636] F636: Sample, precursor, wild-type a	Found in Sample: [S637] F637: Sample, beta, wild-type a	Found in Sample: [S643] F643: Sample, alpha, CCAB-6	Found in Sample: [S644] F644: Sample, alpha, CCAB-6
3232	1	3	3	14	[Master Protein] ACRE_090840	Not Found	Not Found	Not Found	Not Found	Not Found	Not Found	High	High	Not Found	Not Found	Not Found	Not Found	High	High	Not Found	Not Found	Not Found	Not Found	Not Found	Not Found	Not Found	High	High	Not Found	Not Found	Not Found	Not Found	High	High	Not Found	Not Found	Not Found	Not Found	Not Found	Not Found	Not Found	Not Found	High
Checked	Confidence	Identifying Node	PSM Ambiguity	Annotated Sequence	Modifications	# Proteins	Master Protein Accessions	Protein Accessions	# Missed Cleavages	Charge	DeltaScore	DeltaCn	Rank	Search Engine Rank	m/z [Da]	MH+ [Da]	Theo. MH+ [Da]	DeltaM [ppm]	Deltam/z [Da]	Activation Type	MS Order	Isolation Interference [%]	Ion Inject Time [ms]	RT [min]	First Scan	Spectrum File	File ID	XCorr	# Protein Groups
FALSE	High	Sequest HT (A2)	Unambiguous	LLAMGGIPHIVELATK		1	ACRE_090840	ACRE_090840	0	2	0.6943	0	1	1	831.985	1662.96	1662.96	1.45	0.00121	CID (Collision Induced Dissociation)	MS2	35.0083	22.576	44.1078	13666	CCAB-11a2.raw	F624	5.07	1
FALSE	High	Sequest HT (A2)	Unambiguous	AVYALSSAVR		1	ACRE_090840	ACRE_090840	0	2	0.5686	0	1	1	518.793	1036.58	1036.58	0.32	0.00017	CID (Collision Induced Dissociation)	MS2	28.7542	4.61	35.4338	6650	CCAB-3a1-2.raw	F591	2.99	1
FALSE	High	Sequest HT (A2)	Unambiguous	AVYALSSAVR		1	ACRE_090840	ACRE_090840	0	2	0.5151	0	1	1	518.793	1036.58	1036.58	-0.48	-0.00025	CID (Collision Induced Dissociation)	MS2	64.1029	41.585	30.8188	5190	CCAB-11a.raw	F623	2.99	1
FALSE	High	Sequest HT (A2)	Unambiguous	AVYALSSAVR		1	ACRE_090840	ACRE_090840	0	2	0.6203	0	1	1	518.793	1036.58	1036.58	0.32	0.00017	CID (Collision Induced Dissociation)	MS2	34.4475	4.858	35.5522	5733	CCAB-4a1-2.raw	F597	2.95	1
FALSE	High	Sequest HT (A2)	Unambiguous	KAVYALSSAVR		1	ACRE_090840	ACRE_090840	1	2	0.531	0	1	1	582.842	1164.68	1164.67	2.12	0.00124	CID (Collision Induced Dissociation)	MS2	91.0515	136.631	35.5837	5745	CCAB-4a1-2.raw	F597	2.9	1
FALSE	High	Sequest HT (A2)	Unambiguous	AVYALSSAVR		1	ACRE_090840	ACRE_090840	0	2	0.4852	0	1	1	518.793	1036.58	1036.58	-0.61	-0.00032	CID (Collision Induced Dissociation)	MS2	44.5531	2.849	31.4124	7940	WT-2a2.raw	F630	2.7	1
FALSE	High	Sequest HT (A2)	Unambiguous	AVYALSSAVR		1	ACRE_090840	ACRE_090840	0	2	0.4205	0	1	1	518.793	1036.58	1036.58	0.4	0.00021	CID (Collision Induced Dissociation)	MS2	67.6584	16.773	30.7607	5355	WT-2a.raw	F629	2.64	1
FALSE	High	Sequest HT (A2)	Unambiguous	AVYALSSAVR		1	ACRE_090840	ACRE_090840	0	2	0.5229	0	1	1	518.793	1036.58	1036.58	0.97	0.0005	CID (Collision Induced Dissociation)	MS2	18.0584	31.194	35.4843	4926	CCAB-4a1.raw	F596	2.62	1
FALSE	High	Sequest HT (A2)	Unambiguous	AVYALSSAVR		1	ACRE_090840	ACRE_090840	0	2	0.5119	0	1	1	518.793	1036.58	1036.58	-0.28	-0.00014	CID (Collision Induced Dissociation)	MS2	30.6703	2.279	31.4823	8283	CCAB-11a2.raw	F624	2.52	1
FALSE	High	Sequest HT (A2)	Unambiguous	LLAmGGIPHIVELATK	M4(Oxidation)	1	ACRE_090840	ACRE_090840	0	3	0.472	0	1	1	560.324	1678.96	1678.96	0.25	0.00014	CID (Collision Induced Dissociation)	MS2	54.8482	150	49.394	9745	CCAB-4a1-2.raw	F597	2.5	1
FALSE	High	Sequest HT (A2)	Unambiguous	LLAMGGIPHIVELATK		1	ACRE_090840	ACRE_090840	0	3	0.6183	0	1	1	554.992	1662.96	1662.96	-0.37	-0.00021	CID (Collision Induced Dissociation)	MS2	7.31858	4.91	44.189	13547	WT-2a2.raw	F630	2.41	1
FALSE	High	Sequest HT (A2)	Unambiguous	AVYALSSAVR		1	ACRE_090840	ACRE_090840	0	2	0.4008	0	1	1	518.793	1036.58	1036.58	0.34	0.00018	CID (Collision Induced Dissociation)	MS2	42.745	64.031	35.1717	5480	CCAB-3a1.raw	F590	2.37	1
FALSE	High	Sequest HT (A2)	Unambiguous	AVYALSSAVR		1	ACRE_090840	ACRE_090840	0	2	0.5532	0	1	1	518.795	1036.58	1036.58	3.49	0.00181	CID (Collision Induced Dissociation)	MS2	10.7812	70.381	33.5334	6846	CCAB6-a2.raw	F644	2.35	1
FALSE	High	Sequest HT (A2)	Unambiguous	AVYALSSAVR		1	ACRE_090840	ACRE_090840	0	2	0.3172	0	1	1	518.792	1036.58	1036.58	-1	-0.00052	CID (Collision Induced Dissociation)	MS2	79.7687	53.585	31.5914	5463	CCAB-11a.raw	F623	2.27	1
ACRE_090820	ACRE_090820	10	7	16	6	1107	121.3	5.76	47.3	7	Not Found	High	Not Found	High	Not Found	Not Found	Not Found	Not Found	Not Found	Not Found	High	High	Not Found	Not Found	Not Found	Not Found	Not Found	Not Found	Not Found	High	Not Found	Not Found	Not Found	Not Found	Not Found	Not Found	Not Found	Not Found	Not Found	High	High	Not Found	High	High	High	Not Found	Not Found	Not Found	1
Protein Group ID	# Proteins	# Unique Peptides	# Peptides	# PSMs	Group Description	Found in Sample: [S578] F578: Sample, alpha, CCAB-1	Found in Sample: [S579] F579: Sample, precursor, CCAB-1	Found in Sample: [S580] F580: Sample, beta, CCAB-1	Found in Sample: [S587] F587: Sample, alpha, CCAB-2	Found in Sample: [S588] F588: Sample, beta, CCAB-2	Found in Sample: [S589] F589: Sample, beta, CCAB-2	Found in Sample: [S590] F590: Sample, alpha, CCAB-3	Found in Sample: [S591] F591: Sample, alpha, CCAB-3	Found in Sample: [S592] F592: Sample, alpha, CCAB-3	Found in Sample: [S593] F593: Sample, alpha, CCAB-3	Found in Sample: [S594] F594: Sample, alpha, CCAB-3	Found in Sample: [S595] F595: Sample, alpha, CCAB-3	Found in Sample: [S596] F596: Sample, alpha, CCAB-4	Found in Sample: [S597] F597: Sample, alpha, CCAB-4	Found in Sample: [S598] F598: Sample, alpha, CCAB-4	Found in Sample: [S599] F599: Sample, alpha, CCAB-4	Found in Sample: [S600] F600: Sample, alpha, CCAB-4	Found in Sample: [S601] F601: Sample, alpha, CCAB-4	Found in Sample: [S608] F608: Sample, alpha, CCAB-8	Found in Sample: [S609] F609: Sample, precursor, CCAB-8	Found in Sample: [S610] F610: Sample, beta, CCAB-8	Found in Sample: [S623] F623: Sample, alpha, CCAB-11	Found in Sample: [S624] F624: Sample, alpha, CCAB-11	Found in Sample: [S625] F625: Sample, precursor, CCAB-11	Found in Sample: [S626] F626: Sample, precursor, CCAB-11	Found in Sample: [S627] F627: Sample, beta, CCAB-11	Found in Sample: [S628] F628: Sample, beta, CCAB-11	Found in Sample: [S629] F629: Sample, alpha, wild-type b	Found in Sample: [S630] F630: Sample, alpha, wild-type b	Found in Sample: [S631] F631: Sample, precursor, wild-type b	Found in Sample: [S632] F632: Sample, precursor, wild-type b	Found in Sample: [S633] F633: Sample, beta, wild-type b	Found in Sample: [S634] F634: Sample, beta, wild-type b	Found in Sample: [S635] F635: Sample, alpha, wild-type a	Found in Sample: [S636] F636: Sample, precursor, wild-type a	Found in Sample: [S637] F637: Sample, beta, wild-type a	Found in Sample: [S643] F643: Sample, alpha, CCAB-6	Found in Sample: [S644] F644: Sample, alpha, CCAB-6
1314	1	6	7	16	[Master Protein] ACRE_090820	Not Found	High	Not Found	High	Not Found	Not Found	Not Found	Not Found	Not Found	Not Found	High	High	Not Found	Not Found	Not Found	Not Found	Not Found	Not Found	Not Found	High	Not Found	Not Found	Not Found	Not Found	Not Found	Not Found	Not Found	Not Found	Not Found	High	High	Not Found	High	High	High	Not Found	Not Found	Not Found
Checked	Confidence	Identifying Node	PSM Ambiguity	Annotated Sequence	Modifications	# Proteins	Master Protein Accessions	Protein Accessions	# Missed Cleavages	Charge	DeltaScore	DeltaCn	Rank	Search Engine Rank	m/z [Da]	MH+ [Da]	Theo. MH+ [Da]	DeltaM [ppm]	Deltam/z [Da]	Activation Type	MS Order	Isolation Interference [%]	Ion Inject Time [ms]	RT [min]	First Scan	Spectrum File	File ID	XCorr	# Protein Groups
FALSE	High	Sequest HT (A2)	Unambiguous	SGNQDTVITAEIVPGDLVELK		1	ACRE_090820	ACRE_090820	0	2	0.5543	0	1	1	1099.59	2198.17	2198.16	6.07	0.00667	CID (Collision Induced Dissociation)	MS2	33.1869	89.06	45.5496	14185	WT-2ab2.raw	F632	4.6	1
FALSE	High	Sequest HT (A2)	Unambiguous	GTYSVGTTNEPFNPTEGDLSLNEAEPR		1	ACRE_090820	ACRE_090820	0	3	0.5694	0	1	1	965.779	2895.32	2895.33	-1.89	-0.00182	CID (Collision Induced Dissociation)	MS2	10.0587	150	39.7344	5340	CCAB-1ab.raw	F579	3.6	1
FALSE	High	Sequest HT (A2)	Unambiguous	FLGVNVGTPLQK		2	ACRE_090820; ACRE_087300	ACRE_090820; ACRE_087300	0	2	0.4399	0	1	1	636.869	1272.73	1272.73	0.09	6e-05	CID (Collision Induced Dissociation)	MS2	53.1694	4.938	38.9389	11381	WT-2ab2.raw	F632	3.41	2
FALSE	High	Sequest HT (A2)	Unambiguous	FLGVNVGTPLQK		2	ACRE_090820; ACRE_087300	ACRE_090820; ACRE_087300	0	2	0.4653	0	1	1	636.869	1272.73	1272.73	-0.59	-0.00037	CID (Collision Induced Dissociation)	MS2	67.5286	150	43.7695	7471	CCAB-3a3.raw	F594	3.31	2
FALSE	High	Sequest HT (A2)	Unambiguous	FLGVNVGTPLQK		2	ACRE_090820; ACRE_087300	ACRE_090820; ACRE_087300	0	2	0.3406	0	1	1	636.867	1272.73	1272.73	-3.17	-0.00202	CID (Collision Induced Dissociation)	MS2	80.887	23.902	38.2856	7919	WT-2ab.raw	F631	3.23	2
FALSE	High	Sequest HT (A2)	Unambiguous	FLGVNVGTPLQK		2	ACRE_090820; ACRE_087300	ACRE_090820; ACRE_087300	0	2	0.3994	0	1	1	636.869	1272.73	1272.73	-1.01	-0.00064	CID (Collision Induced Dissociation)	MS2	48.337	57.644	44.1383	9459	CCAB-2a3-2.raw	F587	3.08	2
FALSE	High	Sequest HT (A2)	Unambiguous	QVAEFPFDSDVKK		1	ACRE_090820	ACRE_090820	1	3	0.4841	0	1	1	503.925	1509.76	1509.76	1.11	0.00056	CID (Collision Induced Dissociation)	MS2	20.6895	2.685	34.2675	9221	WT-2ab2.raw	F632	2.83	1
FALSE	High	Sequest HT (A2)	Unambiguous	MSEIAEDVAR		1	ACRE_090820	ACRE_090820	0	2	0.4397	0	1	1	560.768	1120.53	1120.53	-1.56	-0.00087	CID (Collision Induced Dissociation)	MS2	59.9027	150	32.5581	3520	CCAB-1ab.raw	F579	2.82	1
FALSE	High	Sequest HT (A2)	Unambiguous	MSEIAEDVAR		1	ACRE_090820	ACRE_090820	0	2	0.4007	0	1	1	560.769	1120.53	1120.53	0.7	0.00039	CID (Collision Induced Dissociation)	MS2	63.3335	150	26.6734	4188	WT-ab.raw	F636	2.82	1
FALSE	High	Sequest HT (A2)	Unambiguous	FLGVNVGTPLQK		2	ACRE_090820; ACRE_087300	ACRE_090820; ACRE_087300	0	2	0.2616	0	1	1	636.868	1272.73	1272.73	-1.43	-0.00091	CID (Collision Induced Dissociation)	MS2	70.2197	15.182	34.565	6498	CCAB-8ab.raw	F609	2.79	2
FALSE	High	Sequest HT (A2)	Unambiguous	FLGVNVGTPLQK		2	ACRE_090820; ACRE_087300	ACRE_090820; ACRE_087300	0	2	0.4275	0	1	1	636.87	1272.73	1272.73	1.55	0.00099	CID (Collision Induced Dissociation)	MS2	49.7682	61.337	44.3705	9368	CCAB-3a3-2.raw	F595	2.69	2
FALSE	High	Sequest HT (A2)	Unambiguous	MSEIAEDVAR		1	ACRE_090820	ACRE_090820	0	2	0.4254	0	1	1	560.769	1120.53	1120.53	0.49	0.00028	CID (Collision Induced Dissociation)	MS2	41.4623	11.216	28.979	6708	WT-2ab2.raw	F632	2.68	1
FALSE	High	Sequest HT (A2)	Unambiguous	FLGVNVGTPLQK		2	ACRE_090820; ACRE_087300	ACRE_090820; ACRE_087300	0	2	0.2353	0	1	1	636.869	1272.73	1272.73	-0.67	-0.00043	CID (Collision Induced Dissociation)	MS2	61.9723	12.708	38.863	11718	WT-2b2.raw	F634	2.55	2
FALSE	High	Sequest HT (A2)	Unambiguous	SLSSPTAQAVR		1	ACRE_090820	ACRE_090820	0	2	0.3725	0	1	1	558.804	1116.6	1116.6	-0.4	-0.00022	CID (Collision Induced Dissociation)	MS2	14.0259	6.639	26.0979	5356	WT-2ab2.raw	F632	2.55	1
FALSE	High	Sequest HT (A2)	Unambiguous	NEFGETQGVQPVR		1	ACRE_090820	ACRE_090820	0	2	0.3682	0	1	1	730.86	1460.71	1460.71	-0.21	-0.00015	CID (Collision Induced Dissociation)	MS2	83.7847	150	32.8172	5280	CCAB-3a3-2.raw	F595	2.2	1
FALSE	High	Sequest HT (A2)	Unambiguous	SLSSPTAQAVR		1	ACRE_090820	ACRE_090820	0	2	0.285	0	1	1	558.803	1116.6	1116.6	-2.31	-0.00129	CID (Collision Induced Dissociation)	MS2	55.9589	150	22.2204	3362	WT-a.raw	F635	2.14	1
ACRE_090810	ACRE_090810	17	6	9	6	564	63.5	7.9	28.98	6	Not Found	Not Found	Not Found	Not Found	Not Found	Not Found	Not Found	Not Found	Not Found	Not Found	Not Found	Not Found	Not Found	Not Found	Not Found	Not Found	Not Found	Not Found	Not Found	High	Not Found	Not Found	Not Found	Not Found	Not Found	High	High	Not Found	Not Found	Not Found	Not Found	Not Found	Not Found	Not Found	Not Found	Not Found	Not Found	Not Found	1
Protein Group ID	# Proteins	# Unique Peptides	# Peptides	# PSMs	Group Description	Found in Sample: [S578] F578: Sample, alpha, CCAB-1	Found in Sample: [S579] F579: Sample, precursor, CCAB-1	Found in Sample: [S580] F580: Sample, beta, CCAB-1	Found in Sample: [S587] F587: Sample, alpha, CCAB-2	Found in Sample: [S588] F588: Sample, beta, CCAB-2	Found in Sample: [S589] F589: Sample, beta, CCAB-2	Found in Sample: [S590] F590: Sample, alpha, CCAB-3	Found in Sample: [S591] F591: Sample, alpha, CCAB-3	Found in Sample: [S592] F592: Sample, alpha, CCAB-3	Found in Sample: [S593] F593: Sample, alpha, CCAB-3	Found in Sample: [S594] F594: Sample, alpha, CCAB-3	Found in Sample: [S595] F595: Sample, alpha, CCAB-3	Found in Sample: [S596] F596: Sample, alpha, CCAB-4	Found in Sample: [S597] F597: Sample, alpha, CCAB-4	Found in Sample: [S598] F598: Sample, alpha, CCAB-4	Found in Sample: [S599] F599: Sample, alpha, CCAB-4	Found in Sample: [S600] F600: Sample, alpha, CCAB-4	Found in Sample: [S601] F601: Sample, alpha, CCAB-4	Found in Sample: [S608] F608: Sample, alpha, CCAB-8	Found in Sample: [S609] F609: Sample, precursor, CCAB-8	Found in Sample: [S610] F610: Sample, beta, CCAB-8	Found in Sample: [S623] F623: Sample, alpha, CCAB-11	Found in Sample: [S624] F624: Sample, alpha, CCAB-11	Found in Sample: [S625] F625: Sample, precursor, CCAB-11	Found in Sample: [S626] F626: Sample, precursor, CCAB-11	Found in Sample: [S627] F627: Sample, beta, CCAB-11	Found in Sample: [S628] F628: Sample, beta, CCAB-11	Found in Sample: [S629] F629: Sample, alpha, wild-type b	Found in Sample: [S630] F630: Sample, alpha, wild-type b	Found in Sample: [S631] F631: Sample, precursor, wild-type b	Found in Sample: [S632] F632: Sample, precursor, wild-type b	Found in Sample: [S633] F633: Sample, beta, wild-type b	Found in Sample: [S634] F634: Sample, beta, wild-type b	Found in Sample: [S635] F635: Sample, alpha, wild-type a	Found in Sample: [S636] F636: Sample, precursor, wild-type a	Found in Sample: [S637] F637: Sample, beta, wild-type a	Found in Sample: [S643] F643: Sample, alpha, CCAB-6	Found in Sample: [S644] F644: Sample, alpha, CCAB-6
1200	1	6	6	9	[Master Protein] ACRE_090810	Not Found	Not Found	Not Found	Not Found	Not Found	Not Found	Not Found	Not Found	Not Found	Not Found	Not Found	Not Found	Not Found	Not Found	Not Found	Not Found	Not Found	Not Found	Not Found	High	Not Found	Not Found	Not Found	Not Found	Not Found	High	High	Not Found	Not Found	Not Found	Not Found	Not Found	Not Found	Not Found	Not Found	Not Found	Not Found	Not Found
Checked	Confidence	Identifying Node	PSM Ambiguity	Annotated Sequence	Modifications	# Proteins	Master Protein Accessions	Protein Accessions	# Missed Cleavages	Charge	DeltaScore	DeltaCn	Rank	Search Engine Rank	m/z [Da]	MH+ [Da]	Theo. MH+ [Da]	DeltaM [ppm]	Deltam/z [Da]	Activation Type	MS Order	Isolation Interference [%]	Ion Inject Time [ms]	RT [min]	First Scan	Spectrum File	File ID	XCorr	# Protein Groups
FALSE	High	Sequest HT (A2)	Unambiguous	ATIGPGGEVPEDYFFPNASPR		1	ACRE_090810	ACRE_090810	0	2	0.6747	0	1	1	1111.03	2221.05	2221.06	-3.61	-0.00401	CID (Collision Induced Dissociation)	MS2	36.1416	40.602	36.6676	7272	CCAB-8ab.raw	F609	4.98	1
FALSE	High	Sequest HT (A2)	Unambiguous	ATIGPGGEVPEDYFFPNASPR		1	ACRE_090810	ACRE_090810	0	2	0.712	0	1	1	1111.03	2221.06	2221.06	0.13	0.00015	CID (Collision Induced Dissociation)	MS2	42.0944	78.714	36.6204	7255	CCAB-8ab.raw	F609	4.93	1
FALSE	High	Sequest HT (A2)	Unambiguous	ISSPDFAGmDPDK	M9(Oxidation)	1	ACRE_090810	ACRE_090810	0	2	0.5844	0	1	1	698.313	1395.62	1395.61	6.36	0.00444	CID (Collision Induced Dissociation)	MS2	46.6707	96.263	27.9542	3819	CCAB-8ab.raw	F609	3.08	1
FALSE	High	Sequest HT (A2)	Unambiguous	HREQEAAELR		1	ACRE_090810	ACRE_090810	1	3	0.2705	0	1	1	413.546	1238.62	1238.62	-1.18	-0.00049	CID (Collision Induced Dissociation)	MS2	79.5889	101.488	20.8434	3760	CCAB-11b2.raw	F628	2.92	1
FALSE	High	Sequest HT (A2)	Unambiguous	NEIIEIIPAAYQNEAK		1	ACRE_090810	ACRE_090810	0	2	0.5684	0	1	1	908.483	1815.96	1815.95	6.01	0.00546	CID (Collision Induced Dissociation)	MS2	87.1203	63.379	40.8097	9884	CCAB-11b.raw	F627	2.85	1
FALSE	High	Sequest HT (A2)	Unambiguous	ISSPDFAGmDPDK	M9(Oxidation)	1	ACRE_090810	ACRE_090810	0	2	0.5	0	1	1	698.309	1395.61	1395.61	1.12	0.00078	CID (Collision Induced Dissociation)	MS2	55.8501	34.708	27.9774	3827	CCAB-8ab.raw	F609	2.8	1
FALSE	High	Sequest HT (A2)	Unambiguous	AGTGATADEKDSYKSDAPLSPEGK		1	ACRE_090810	ACRE_090810	2	3	0.4789	0	1	1	799.045	2395.12	2395.13	-2.7	-0.00216	CID (Collision Induced Dissociation)	MS2	12.4315	44.152	26.6594	6207	CCAB-11b2.raw	F628	2.61	1
FALSE	High	Sequest HT (A2)	Unambiguous	LEPIILELER		1	ACRE_090810	ACRE_090810	0	2	0.3029	0	1	1	612.861	1224.71	1224.72	-4.65	-0.00285	CID (Collision Induced Dissociation)	MS2	70.5928	111.204	38.0456	7736	CCAB-8ab.raw	F609	2.41	1
FALSE	High	Sequest HT (A2)	Unambiguous	HREQEAAELR		1	ACRE_090810	ACRE_090810	1	3	0.2292	0	1	1	413.546	1238.62	1238.62	-0.3	-0.00012	CID (Collision Induced Dissociation)	MS2	51.8219	20.456	21.6224	4012	CCAB-11b2.raw	F628	2.4	1
ACRE_090790	ACRE_090790	4	1	2	1	357	38.5	5.74	6.65	1	Not Found	Not Found	Not Found	High	Not Found	Not Found	Not Found	Not Found	Not Found	Not Found	Not Found	Not Found	Not Found	Not Found	Not Found	Not Found	Not Found	High	Not Found	Not Found	Not Found	Not Found	Not Found	Not Found	Not Found	Not Found	Not Found	Not Found	Not Found	Not Found	Not Found	Not Found	Not Found	Not Found	Not Found	Not Found	Not Found	Not Found	1
Protein Group ID	# Proteins	# Unique Peptides	# Peptides	# PSMs	Group Description	Found in Sample: [S578] F578: Sample, alpha, CCAB-1	Found in Sample: [S579] F579: Sample, precursor, CCAB-1	Found in Sample: [S580] F580: Sample, beta, CCAB-1	Found in Sample: [S587] F587: Sample, alpha, CCAB-2	Found in Sample: [S588] F588: Sample, beta, CCAB-2	Found in Sample: [S589] F589: Sample, beta, CCAB-2	Found in Sample: [S590] F590: Sample, alpha, CCAB-3	Found in Sample: [S591] F591: Sample, alpha, CCAB-3	Found in Sample: [S592] F592: Sample, alpha, CCAB-3	Found in Sample: [S593] F593: Sample, alpha, CCAB-3	Found in Sample: [S594] F594: Sample, alpha, CCAB-3	Found in Sample: [S595] F595: Sample, alpha, CCAB-3	Found in Sample: [S596] F596: Sample, alpha, CCAB-4	Found in Sample: [S597] F597: Sample, alpha, CCAB-4	Found in Sample: [S598] F598: Sample, alpha, CCAB-4	Found in Sample: [S599] F599: Sample, alpha, CCAB-4	Found in Sample: [S600] F600: Sample, alpha, CCAB-4	Found in Sample: [S601] F601: Sample, alpha, CCAB-4	Found in Sample: [S608] F608: Sample, alpha, CCAB-8	Found in Sample: [S609] F609: Sample, precursor, CCAB-8	Found in Sample: [S610] F610: Sample, beta, CCAB-8	Found in Sample: [S623] F623: Sample, alpha, CCAB-11	Found in Sample: [S624] F624: Sample, alpha, CCAB-11	Found in Sample: [S625] F625: Sample, precursor, CCAB-11	Found in Sample: [S626] F626: Sample, precursor, CCAB-11	Found in Sample: [S627] F627: Sample, beta, CCAB-11	Found in Sample: [S628] F628: Sample, beta, CCAB-11	Found in Sample: [S629] F629: Sample, alpha, wild-type b	Found in Sample: [S630] F630: Sample, alpha, wild-type b	Found in Sample: [S631] F631: Sample, precursor, wild-type b	Found in Sample: [S632] F632: Sample, precursor, wild-type b	Found in Sample: [S633] F633: Sample, beta, wild-type b	Found in Sample: [S634] F634: Sample, beta, wild-type b	Found in Sample: [S635] F635: Sample, alpha, wild-type a	Found in Sample: [S636] F636: Sample, precursor, wild-type a	Found in Sample: [S637] F637: Sample, beta, wild-type a	Found in Sample: [S643] F643: Sample, alpha, CCAB-6	Found in Sample: [S644] F644: Sample, alpha, CCAB-6
472	1	1	1	2	[Master Protein] ACRE_090790	Not Found	Not Found	Not Found	High	Not Found	Not Found	Not Found	Not Found	Not Found	Not Found	Not Found	Not Found	Not Found	Not Found	Not Found	Not Found	Not Found	High	Not Found	Not Found	Not Found	Not Found	Not Found	Not Found	Not Found	Not Found	Not Found	Not Found	Not Found	Not Found	Not Found	Not Found	Not Found	Not Found	Not Found	Not Found	Not Found	Not Found
Checked	Confidence	Identifying Node	PSM Ambiguity	Annotated Sequence	Modifications	# Proteins	Master Protein Accessions	Protein Accessions	# Missed Cleavages	Charge	DeltaScore	DeltaCn	Rank	Search Engine Rank	m/z [Da]	MH+ [Da]	Theo. MH+ [Da]	DeltaM [ppm]	Deltam/z [Da]	Activation Type	MS Order	Isolation Interference [%]	Ion Inject Time [ms]	RT [min]	First Scan	Spectrum File	File ID	XCorr	# Protein Groups
FALSE	High	Sequest HT (A2)	Unambiguous	INPYTFAAmYGTNK	M9(Oxidation)	1	ACRE_090790	ACRE_090790	0	2	0.5345	0	1	1	803.881	1606.75	1606.76	-1.27	-0.00102	CID (Collision Induced Dissociation)	MS2	29.3138	150	41.8472	7352	CCAB-4a3-2.raw	F601	3.33	1
FALSE	High	Sequest HT (A2)	Unambiguous	INPYTFAAmYGTNK	M9(Oxidation)	1	ACRE_090790	ACRE_090790	0	2	0.5	0	1	1	803.882	1606.76	1606.76	-0.31	-0.00025	CID (Collision Induced Dissociation)	MS2	75.3676	124.141	41.8708	8687	CCAB-2a3-2.raw	F587	3.32	1
ACRE_090760	ACRE_090760	6	4	7	4	593	64.7	9.19	22	4	Not Found	Not Found	Not Found	Not Found	Not Found	Not Found	Not Found	Not Found	Not Found	Not Found	Not Found	Not Found	Not Found	Not Found	Not Found	Not Found	Not Found	Not Found	Not Found	Not Found	High	High	High	Not Found	Not Found	Not Found	Not Found	Not Found	Not Found	Not Found	Not Found	Not Found	Not Found	Not Found	Not Found	Not Found	Not Found	Not Found	1
Protein Group ID	# Proteins	# Unique Peptides	# Peptides	# PSMs	Group Description	Found in Sample: [S578] F578: Sample, alpha, CCAB-1	Found in Sample: [S579] F579: Sample, precursor, CCAB-1	Found in Sample: [S580] F580: Sample, beta, CCAB-1	Found in Sample: [S587] F587: Sample, alpha, CCAB-2	Found in Sample: [S588] F588: Sample, beta, CCAB-2	Found in Sample: [S589] F589: Sample, beta, CCAB-2	Found in Sample: [S590] F590: Sample, alpha, CCAB-3	Found in Sample: [S591] F591: Sample, alpha, CCAB-3	Found in Sample: [S592] F592: Sample, alpha, CCAB-3	Found in Sample: [S593] F593: Sample, alpha, CCAB-3	Found in Sample: [S594] F594: Sample, alpha, CCAB-3	Found in Sample: [S595] F595: Sample, alpha, CCAB-3	Found in Sample: [S596] F596: Sample, alpha, CCAB-4	Found in Sample: [S597] F597: Sample, alpha, CCAB-4	Found in Sample: [S598] F598: Sample, alpha, CCAB-4	Found in Sample: [S599] F599: Sample, alpha, CCAB-4	Found in Sample: [S600] F600: Sample, alpha, CCAB-4	Found in Sample: [S601] F601: Sample, alpha, CCAB-4	Found in Sample: [S608] F608: Sample, alpha, CCAB-8	Found in Sample: [S609] F609: Sample, precursor, CCAB-8	Found in Sample: [S610] F610: Sample, beta, CCAB-8	Found in Sample: [S623] F623: Sample, alpha, CCAB-11	Found in Sample: [S624] F624: Sample, alpha, CCAB-11	Found in Sample: [S625] F625: Sample, precursor, CCAB-11	Found in Sample: [S626] F626: Sample, precursor, CCAB-11	Found in Sample: [S627] F627: Sample, beta, CCAB-11	Found in Sample: [S628] F628: Sample, beta, CCAB-11	Found in Sample: [S629] F629: Sample, alpha, wild-type b	Found in Sample: [S630] F630: Sample, alpha, wild-type b	Found in Sample: [S631] F631: Sample, precursor, wild-type b	Found in Sample: [S632] F632: Sample, precursor, wild-type b	Found in Sample: [S633] F633: Sample, beta, wild-type b	Found in Sample: [S634] F634: Sample, beta, wild-type b	Found in Sample: [S635] F635: Sample, alpha, wild-type a	Found in Sample: [S636] F636: Sample, precursor, wild-type a	Found in Sample: [S637] F637: Sample, beta, wild-type a	Found in Sample: [S643] F643: Sample, alpha, CCAB-6	Found in Sample: [S644] F644: Sample, alpha, CCAB-6
526	1	4	4	7	[Master Protein] ACRE_090760	Not Found	Not Found	Not Found	Not Found	Not Found	Not Found	Not Found	Not Found	Not Found	Not Found	Not Found	Not Found	Not Found	Not Found	Not Found	Not Found	Not Found	Not Found	Not Found	Not Found	High	High	High	Not Found	Not Found	Not Found	Not Found	Not Found	Not Found	Not Found	Not Found	Not Found	Not Found	Not Found	Not Found	Not Found	Not Found	Not Found
Checked	Confidence	Identifying Node	PSM Ambiguity	Annotated Sequence	Modifications	# Proteins	Master Protein Accessions	Protein Accessions	# Missed Cleavages	Charge	DeltaScore	DeltaCn	Rank	Search Engine Rank	m/z [Da]	MH+ [Da]	Theo. MH+ [Da]	DeltaM [ppm]	Deltam/z [Da]	Activation Type	MS Order	Isolation Interference [%]	Ion Inject Time [ms]	RT [min]	First Scan	Spectrum File	File ID	XCorr	# Protein Groups
FALSE	High	Sequest HT (A2)	Unambiguous	DHTTDQLNEAGDEYLPR		1	ACRE_090760	ACRE_090760	0	2	0.8557	0	1	1	987.443	1973.88	1973.88	-2.58	-0.00255	CID (Collision Induced Dissociation)	MS2	34.498	39.307	33.6774	9305	CCAB-11a2.raw	F624	5.75	1
FALSE	High	Sequest HT (A2)	Unambiguous	KQGFTEADAAGEK		1	ACRE_090760	ACRE_090760	1	3	0.6136	0	1	1	451.221	1351.65	1351.65	0.07	3e-05	CID (Collision Induced Dissociation)	MS2	23.5639	13.877	22.2409	4188	CCAB-11a2.raw	F624	3.96	1
FALSE	High	Sequest HT (A2)	Unambiguous	KQGFTEADAAGEK		1	ACRE_090760	ACRE_090760	1	2	0.5936	0	1	1	676.324	1351.64	1351.65	-5.84	-0.00395	CID (Collision Induced Dissociation)	MS2	85.4785	150	23.091	2079	CCAB-8b.raw	F610	2.83	1
FALSE	High	Sequest HT (A2)	Unambiguous	DSYLLFNK		1	ACRE_090760	ACRE_090760	0	2	0.4238	0	1	1	500.261	999.515	999.515	-0.02	-1e-05	CID (Collision Induced Dissociation)	MS2	39.645	19.059	36.9564	10764	CCAB-11a2.raw	F624	2.69	1
FALSE	High	Sequest HT (A2)	Unambiguous	DHTTDQLNEAGDEYLPR		1	ACRE_090760	ACRE_090760	0	3	0.4268	0	1	1	658.635	1973.89	1973.88	3.08	0.00202	CID (Collision Induced Dissociation)	MS2	83.821	58.409	33.2202	6058	CCAB-11a.raw	F623	2.46	1
FALSE	High	Sequest HT (A2)	Unambiguous	DSYLLFNK		1	ACRE_090760	ACRE_090760	0	2	0.347	0	1	1	500.261	999.514	999.515	-0.46	-0.00023	CID (Collision Induced Dissociation)	MS2	43.02	42.351	37.125	7387	CCAB-11a.raw	F623	2.19	1
FALSE	High	Sequest HT (A2)	Unambiguous	QGFTEADAAGEK		1	ACRE_090760	ACRE_090760	0	2	0.4481	0	1	1	612.28	1223.55	1223.55	-0.8	-0.00049	CID (Collision Induced Dissociation)	MS2	53.0674	38.486	25.2249	5374	CCAB-11a2.raw	F624	2.12	1
ACRE_090600	ACRE_090600	25	8	66	8	418	44.3	6.58	213.54	8	High	Not Found	High	High	Not Found	Not Found	High	High	High	High	High	High	High	High	High	Not Found	High	High	High	Not Found	Not Found	High	High	Not Found	Not Found	Not Found	Not Found	High	High	Not Found	Not Found	Not Found	Not Found	High	Not Found	Not Found	High	Not Found	1
Protein Group ID	# Proteins	# Unique Peptides	# Peptides	# PSMs	Group Description	Found in Sample: [S578] F578: Sample, alpha, CCAB-1	Found in Sample: [S579] F579: Sample, precursor, CCAB-1	Found in Sample: [S580] F580: Sample, beta, CCAB-1	Found in Sample: [S587] F587: Sample, alpha, CCAB-2	Found in Sample: [S588] F588: Sample, beta, CCAB-2	Found in Sample: [S589] F589: Sample, beta, CCAB-2	Found in Sample: [S590] F590: Sample, alpha, CCAB-3	Found in Sample: [S591] F591: Sample, alpha, CCAB-3	Found in Sample: [S592] F592: Sample, alpha, CCAB-3	Found in Sample: [S593] F593: Sample, alpha, CCAB-3	Found in Sample: [S594] F594: Sample, alpha, CCAB-3	Found in Sample: [S595] F595: Sample, alpha, CCAB-3	Found in Sample: [S596] F596: Sample, alpha, CCAB-4	Found in Sample: [S597] F597: Sample, alpha, CCAB-4	Found in Sample: [S598] F598: Sample, alpha, CCAB-4	Found in Sample: [S599] F599: Sample, alpha, CCAB-4	Found in Sample: [S600] F600: Sample, alpha, CCAB-4	Found in Sample: [S601] F601: Sample, alpha, CCAB-4	Found in Sample: [S608] F608: Sample, alpha, CCAB-8	Found in Sample: [S609] F609: Sample, precursor, CCAB-8	Found in Sample: [S610] F610: Sample, beta, CCAB-8	Found in Sample: [S623] F623: Sample, alpha, CCAB-11	Found in Sample: [S624] F624: Sample, alpha, CCAB-11	Found in Sample: [S625] F625: Sample, precursor, CCAB-11	Found in Sample: [S626] F626: Sample, precursor, CCAB-11	Found in Sample: [S627] F627: Sample, beta, CCAB-11	Found in Sample: [S628] F628: Sample, beta, CCAB-11	Found in Sample: [S629] F629: Sample, alpha, wild-type b	Found in Sample: [S630] F630: Sample, alpha, wild-type b	Found in Sample: [S631] F631: Sample, precursor, wild-type b	Found in Sample: [S632] F632: Sample, precursor, wild-type b	Found in Sample: [S633] F633: Sample, beta, wild-type b	Found in Sample: [S634] F634: Sample, beta, wild-type b	Found in Sample: [S635] F635: Sample, alpha, wild-type a	Found in Sample: [S636] F636: Sample, precursor, wild-type a	Found in Sample: [S637] F637: Sample, beta, wild-type a	Found in Sample: [S643] F643: Sample, alpha, CCAB-6	Found in Sample: [S644] F644: Sample, alpha, CCAB-6
2972	1	8	8	66	[Master Protein] ACRE_090600	High	Not Found	High	High	Not Found	Not Found	High	High	High	High	High	High	High	High	High	Not Found	High	High	High	Not Found	Not Found	High	High	Not Found	Not Found	Not Found	Not Found	High	High	Not Found	Not Found	Not Found	Not Found	High	Not Found	Not Found	High	Not Found
Checked	Confidence	Identifying Node	PSM Ambiguity	Annotated Sequence	Modifications	# Proteins	Master Protein Accessions	Protein Accessions	# Missed Cleavages	Charge	DeltaScore	DeltaCn	Rank	Search Engine Rank	m/z [Da]	MH+ [Da]	Theo. MH+ [Da]	DeltaM [ppm]	Deltam/z [Da]	Activation Type	MS Order	Isolation Interference [%]	Ion Inject Time [ms]	RT [min]	First Scan	Spectrum File	File ID	XCorr	# Protein Groups
FALSE	High	Sequest HT (A2)	Unambiguous	ATLDAVVDGAQNAGK		1	ACRE_090600	ACRE_090600	0	2	0.6564	0	1	1	715.367	1429.73	1429.73	-1.45	-0.00104	CID (Collision Induced Dissociation)	MS2	28.3357	11.858	31.8995	8162	WT-2a2.raw	F630	4.89	1
FALSE	High	Sequest HT (A2)	Unambiguous	ATLDAVVDGAQNAGK		1	ACRE_090600	ACRE_090600	0	2	0.5953	0	1	1	715.368	1429.73	1429.73	0.46	0.00033	CID (Collision Induced Dissociation)	MS2	49.8993	28.492	31.9229	8489	CCAB-11a2.raw	F624	4.72	1
FALSE	High	Sequest HT (A2)	Unambiguous	ATLDAVVDGAQNAGK		1	ACRE_090600	ACRE_090600	0	2	0.5884	0	1	1	715.366	1429.73	1429.73	-2.12	-0.00152	CID (Collision Induced Dissociation)	MS2	27.4957	150	32.4386	4231	CCAB-1a.raw	F578	4.64	1
FALSE	High	Sequest HT (A2)	Unambiguous	ATLDAVVDGAQNAGK		1	ACRE_090600	ACRE_090600	0	2	0.5551	0	1	1	715.366	1429.72	1429.73	-2.8	-0.002	CID (Collision Induced Dissociation)	MS2	32.8128	150	35.7111	5229	CCAB-3a2.raw	F592	4.63	1
FALSE	High	Sequest HT (A2)	Unambiguous	TLDGMSIGNSLFDEAGAK		1	ACRE_090600	ACRE_090600	0	2	0.7155	0	1	1	913.433	1825.86	1825.86	-3.04	-0.00278	CID (Collision Induced Dissociation)	MS2	28.5917	27.887	42.3394	12990	CCAB-11a2.raw	F624	4.57	1
FALSE	High	Sequest HT (A2)	Unambiguous	ATLDAVVDGAQNAGK		1	ACRE_090600	ACRE_090600	0	2	0.6635	0	1	1	715.366	1429.73	1429.73	-2.11	-0.0015	CID (Collision Induced Dissociation)	MS2	51.7234	148.611	29.7209	5279	WT-a.raw	F635	4.22	1
FALSE	High	Sequest HT (A2)	Unambiguous	ATLDAVVDGAQNAGK		1	ACRE_090600	ACRE_090600	0	2	0.5518	0	1	1	715.37	1429.73	1429.73	3.5	0.0025	CID (Collision Induced Dissociation)	MS2	88.007	98.748	35.6063	6164	CCAB-3a2-2.raw	F593	4.15	1
FALSE	High	Sequest HT (A2)	Unambiguous	ATLDAVVDGAQNAGK		1	ACRE_090600	ACRE_090600	0	2	0.6	0	1	1	715.368	1429.73	1429.73	-0.13	-0.0001	CID (Collision Induced Dissociation)	MS2	70.6574	150	35.8951	5447	CCAB-4a2.raw	F598	4.1	1
FALSE	High	Sequest HT (A2)	Unambiguous	ATLDAVVDGAQNAGK		1	ACRE_090600	ACRE_090600	0	2	0.5711	0	1	1	715.368	1429.73	1429.73	-0.24	-0.00017	CID (Collision Induced Dissociation)	MS2	37.1007	70.652	35.4631	5565	CCAB-3a1.raw	F590	4.08	1
FALSE	High	Sequest HT (A2)	Unambiguous	TILWNGPAGVFEFEK		1	ACRE_090600	ACRE_090600	0	2	0.6201	0	1	1	854.438	1707.87	1707.87	-3.35	-0.00286	CID (Collision Induced Dissociation)	MS2	3.85676	41.639	46.918	14632	CCAB-11a2.raw	F624	4.08	1
FALSE	High	Sequest HT (A2)	Unambiguous	ADGGAVVLLENLR		1	ACRE_090600	ACRE_090600	0	2	0.5661	0	1	1	663.87	1326.73	1326.74	-3.38	-0.00224	CID (Collision Induced Dissociation)	MS2	80.4691	150	36.8155	5794	CCAB-8a.raw	F608	4.01	1
FALSE	High	Sequest HT (A2)	Unambiguous	ATLDAVVDGAQNAGK		1	ACRE_090600	ACRE_090600	0	2	0.5732	0	1	1	715.367	1429.73	1429.73	-0.44	-0.00032	CID (Collision Induced Dissociation)	MS2	82.077	50.574	35.5604	5737	CCAB-4a1-2.raw	F597	3.96	1
FALSE	High	Sequest HT (A2)	Unambiguous	TILWNGPAGVFEFEK		1	ACRE_090600	ACRE_090600	0	2	0.6099	0	1	1	854.44	1707.87	1707.87	-0.63	-0.00053	CID (Collision Induced Dissociation)	MS2	20.1891	24.652	46.8388	14579	WT-2a2.raw	F630	3.82	1
FALSE	High	Sequest HT (A2)	Unambiguous	ATLDAVVDGAQNAGK		1	ACRE_090600	ACRE_090600	0	2	0.485	0	1	1	715.367	1429.73	1429.73	-1.39	-0.00099	CID (Collision Induced Dissociation)	MS2	56.6927	59.134	35.5105	6401	CCAB-2a3-2.raw	F587	3.67	1
FALSE	High	Sequest HT (A2)	Unambiguous	ADGGAVVLLENLR		1	ACRE_090600	ACRE_090600	0	2	0.6446	0	1	1	663.871	1326.73	1326.74	-2.19	-0.00146	CID (Collision Induced Dissociation)	MS2	22.8939	150	44.0256	9746	CCAB-6a1.raw	F643	3.63	1
FALSE	High	Sequest HT (A2)	Unambiguous	ADGGAVVLLENLR		1	ACRE_090600	ACRE_090600	0	2	0.5279	0	1	1	663.873	1326.74	1326.74	1.42	0.00094	CID (Collision Induced Dissociation)	MS2	74.4062	150	47.1122	10348	CCAB-2a3-2.raw	F587	3.58	1
FALSE	High	Sequest HT (A2)	Unambiguous	ATLDAVVDGAQNAGK		1	ACRE_090600	ACRE_090600	0	2	0.4888	0	1	1	715.369	1429.73	1429.73	1.86	0.00133	CID (Collision Induced Dissociation)	MS2	31.1058	13.328	31.2228	5331	CCAB-11a.raw	F623	3.58	1
FALSE	High	Sequest HT (A2)	Unambiguous	ATLDAVVDGAQNAGK		1	ACRE_090600	ACRE_090600	0	2	0.6611	0	1	1	715.365	1429.72	1429.73	-3.43	-0.00245	CID (Collision Induced Dissociation)	MS2	69.6777	47.822	31.9741	5827	WT-2a.raw	F629	3.57	1
FALSE	High	Sequest HT (A2)	Unambiguous	ATLDAVVDGAQNAGK		1	ACRE_090600	ACRE_090600	0	2	0.5876	0	1	1	715.367	1429.73	1429.73	-0.47	-0.00034	CID (Collision Induced Dissociation)	MS2	59.5217	150	29.5587	5250	CCAB-1b.raw	F580	3.54	1
FALSE	High	Sequest HT (A2)	Unambiguous	ADGGAVVLLENLR		1	ACRE_090600	ACRE_090600	0	2	0.661	0	1	1	663.873	1326.74	1326.74	0.92	0.00061	CID (Collision Induced Dissociation)	MS2	13.7108	15.918	42.1376	12910	CCAB-11a2.raw	F624	3.54	1
FALSE	High	Sequest HT (A2)	Unambiguous	TILWNGPAGVFEFEK		1	ACRE_090600	ACRE_090600	0	2	0.5759	0	1	1	854.442	1707.88	1707.87	1.05	0.0009	CID (Collision Induced Dissociation)	MS2	58.7361	150	46.5628	9379	WT-a.raw	F635	3.49	1
FALSE	High	Sequest HT (A2)	Unambiguous	YSLQPVVPELEK		1	ACRE_090600	ACRE_090600	0	2	0.5216	0	1	1	701.385	1401.76	1401.76	0.64	0.00045	CID (Collision Induced Dissociation)	MS2	51.8772	21.73	43.6539	9559	CCAB-3a1-2.raw	F591	3.47	1
FALSE	High	Sequest HT (A2)	Unambiguous	ADGGAVVLLENLR		1	ACRE_090600	ACRE_090600	0	2	0.6029	0	1	1	663.873	1326.74	1326.74	1.21	0.0008	CID (Collision Induced Dissociation)	MS2	37.88	150	47.2516	9178	CCAB-4a1-2.raw	F597	3.45	1
FALSE	High	Sequest HT (A2)	Unambiguous	TILWNGPAGVFEFEK		1	ACRE_090600	ACRE_090600	0	2	0.6424	0	1	1	854.439	1707.87	1707.87	-1.97	-0.00168	CID (Collision Induced Dissociation)	MS2	14.3065	28.484	46.3186	10961	WT-2a.raw	F629	3.44	1
FALSE	High	Sequest HT (A2)	Unambiguous	ATLDAVVDGAQNAGK		1	ACRE_090600	ACRE_090600	0	2	0.4942	0	1	1	715.367	1429.73	1429.73	-0.87	-0.00062	CID (Collision Induced Dissociation)	MS2	82.0849	74.534	31.159	5509	WT-2a.raw	F629	3.42	1
FALSE	High	Sequest HT (A2)	Unambiguous	YSLQPVVPELEK		1	ACRE_090600	ACRE_090600	0	2	0.4956	0	1	1	701.384	1401.76	1401.76	-0.97	-0.00068	CID (Collision Induced Dissociation)	MS2	24.8181	32.211	43.6304	8214	CCAB-4a1-2.raw	F597	3.39	1
FALSE	High	Sequest HT (A2)	Unambiguous	ATLDAVVDGAQNAGK		1	ACRE_090600	ACRE_090600	0	2	0.4179	0	1	1	715.367	1429.73	1429.73	-0.71	-0.00051	CID (Collision Induced Dissociation)	MS2	56.04	78.999	35.698	6339	CCAB-3a3-2.raw	F595	3.35	1
FALSE	High	Sequest HT (A2)	Unambiguous	TILWNGPAGVFEFEK		1	ACRE_090600	ACRE_090600	0	2	0.5225	0	1	1	854.441	1707.87	1707.87	0.12	0.0001	CID (Collision Induced Dissociation)	MS2	64.9709	150	46.0817	9269	WT-a.raw	F635	3.33	1
FALSE	High	Sequest HT (A2)	Unambiguous	ADGGAVVLLENLR		1	ACRE_090600	ACRE_090600	0	2	0.6205	0	1	1	663.872	1326.74	1326.74	-0.28	-0.00018	CID (Collision Induced Dissociation)	MS2	48.5708	20.556	42.0287	12671	WT-2a2.raw	F630	3.32	1
FALSE	High	Sequest HT (A2)	Unambiguous	ATLDAVVDGAQNAGK		1	ACRE_090600	ACRE_090600	0	2	0.5927	0	1	1	715.368	1429.73	1429.73	0.74	0.00053	CID (Collision Induced Dissociation)	MS2	28.9434	22.728	31.9803	5602	CCAB-11a.raw	F623	3.29	1
FALSE	High	Sequest HT (A2)	Unambiguous	ADGGAVVLLENLR		1	ACRE_090600	ACRE_090600	0	2	0.5502	0	1	1	663.871	1326.74	1326.74	-1.85	-0.00122	CID (Collision Induced Dissociation)	MS2	50.3048	95.214	47.1455	10650	CCAB-3a1-2.raw	F591	3.29	1
FALSE	High	Sequest HT (A2)	Unambiguous	TILWNGPAGVFEFEK		1	ACRE_090600	ACRE_090600	0	2	0.5232	0	1	1	854.441	1707.88	1707.87	0.87	0.00074	CID (Collision Induced Dissociation)	MS2	44.5313	150	47.0251	10180	CCAB-11a.raw	F623	3.23	1
FALSE	High	Sequest HT (A2)	Unambiguous	YSLQPVVPELEK		1	ACRE_090600	ACRE_090600	0	2	0.6304	0	1	1	701.384	1401.76	1401.76	-1.74	-0.00122	CID (Collision Induced Dissociation)	MS2	41.9929	150	37.2645	5458	CCAB-1a.raw	F578	3.22	1
FALSE	High	Sequest HT (A2)	Unambiguous	ADGGAVVLLENLR		1	ACRE_090600	ACRE_090600	0	2	0.4658	0	1	1	663.872	1326.74	1326.74	-1.27	-0.00084	CID (Collision Induced Dissociation)	MS2	68.0978	150	46.7866	8208	CCAB-3a3.raw	F594	3.22	1
FALSE	High	Sequest HT (A2)	Unambiguous	YSLQPVVPELEK		1	ACRE_090600	ACRE_090600	0	2	0.605	0	1	1	701.385	1401.76	1401.76	0.51	0.00036	CID (Collision Induced Dissociation)	MS2	34.0582	65.51	43.3677	7744	CCAB-3a1.raw	F590	3.19	1
FALSE	High	Sequest HT (A2)	Unambiguous	YSLQPVVPELEK		1	ACRE_090600	ACRE_090600	0	2	0.4169	0	1	1	701.384	1401.76	1401.76	-1.4	-0.00098	CID (Collision Induced Dissociation)	MS2	26.3162	120.851	43.3979	7749	CCAB-4a3-2.raw	F601	3.19	1
FALSE	High	Sequest HT (A2)	Unambiguous	ADGGAVVLLENLR		1	ACRE_090600	ACRE_090600	0	2	0.5552	0	1	1	663.872	1326.74	1326.74	-0.21	-0.00014	CID (Collision Induced Dissociation)	MS2	48.6848	150	46.6535	8566	CCAB-3a1.raw	F590	3.08	1
FALSE	High	Sequest HT (A2)	Unambiguous	ADGGAVVLLENLR		1	ACRE_090600	ACRE_090600	0	2	0.5487	0	1	1	663.873	1326.74	1326.74	0.58	0.00038	CID (Collision Induced Dissociation)	MS2	69.7291	39.952	41.4515	9364	WT-2a.raw	F629	3.08	1
FALSE	High	Sequest HT (A2)	Unambiguous	ADGGAVVLLENLR		1	ACRE_090600	ACRE_090600	0	2	0.4188	0	1	1	663.879	1326.75	1326.74	10.58	0.00702	CID (Collision Induced Dissociation)	MS2	36.3304	150	47.09	8037	CCAB-3a2.raw	F592	3.08	1
FALSE	High	Sequest HT (A2)	Unambiguous	YSLQPVVPELEK		1	ACRE_090600	ACRE_090600	0	2	0.4235	0	1	1	701.385	1401.76	1401.76	-0.46	-0.00032	CID (Collision Induced Dissociation)	MS2	42.4409	115.777	43.6852	8719	CCAB-3a2-2.raw	F593	3.07	1
FALSE	High	Sequest HT (A2)	Unambiguous	TILWNGPAGVFEFEK		1	ACRE_090600	ACRE_090600	0	2	0.6492	0	1	1	854.441	1707.87	1707.87	-0.04	-3e-05	CID (Collision Induced Dissociation)	MS2	36.7787	150	46.6443	10087	CCAB-11a.raw	F623	3.05	1
FALSE	High	Sequest HT (A2)	Unambiguous	TILWNGPAGVFEFEK		1	ACRE_090600	ACRE_090600	0	2	0.5246	0	1	1	854.442	1707.88	1707.87	1.21	0.00103	CID (Collision Induced Dissociation)	MS2	54.761	150	46.1425	7533	CCAB-1a.raw	F578	3.05	1
FALSE	High	Sequest HT (A2)	Unambiguous	ADGGAVVLLENLR		1	ACRE_090600	ACRE_090600	0	2	0.553	0	1	1	663.873	1326.74	1326.74	0.74	0.00049	CID (Collision Induced Dissociation)	MS2	61.4804	150	46.9057	7733	CCAB-4a1.raw	F596	3.02	1
FALSE	High	Sequest HT (A2)	Unambiguous	YSLQPVVPELEK		1	ACRE_090600	ACRE_090600	0	2	0.6146	0	1	1	701.385	1401.76	1401.76	0.65	0.00046	CID (Collision Induced Dissociation)	MS2	32.2592	71.531	43.5726	7422	CCAB-3a3.raw	F594	3.01	1
FALSE	High	Sequest HT (A2)	Unambiguous	TILWNGPAGVFEFEK		1	ACRE_090600	ACRE_090600	0	2	0.68	0	1	1	854.438	1707.87	1707.87	-2.71	-0.00232	CID (Collision Induced Dissociation)	MS2	73.5616	150	46.5845	10070	CCAB-11a.raw	F623	3	1
FALSE	High	Sequest HT (A2)	Unambiguous	YSLQPVVPELEK		1	ACRE_090600	ACRE_090600	0	2	0.5667	0	1	1	701.386	1401.76	1401.76	0.96	0.00068	CID (Collision Induced Dissociation)	MS2	26.1309	4.135	39.0602	11664	CCAB-11a2.raw	F624	3	1
FALSE	High	Sequest HT (A2)	Unambiguous	VDFNVPLDENKK		1	ACRE_090600	ACRE_090600	1	2	0.5401	0	1	1	709.37	1417.73	1417.73	0.04	3e-05	CID (Collision Induced Dissociation)	MS2	31.4137	6.925	33.1526	9064	CCAB-11a2.raw	F624	2.87	1
FALSE	High	Sequest HT (A2)	Unambiguous	LSITDVDLK		1	ACRE_090600	ACRE_090600	0	2	0.3813	0	1	1	502.287	1003.57	1003.57	-0.02	-1e-05	CID (Collision Induced Dissociation)	MS2	55.3494	150	40.4928	6190	CCAB-4a1.raw	F596	2.78	1
FALSE	High	Sequest HT (A2)	Unambiguous	YSLQPVVPELEK		1	ACRE_090600	ACRE_090600	0	2	0.554	0	1	1	701.386	1401.76	1401.76	1.17	0.00082	CID (Collision Induced Dissociation)	MS2	22.5743	150	43.5242	6939	CCAB-4a1.raw	F596	2.78	1
FALSE	High	Sequest HT (A2)	Unambiguous	ADGGAVVLLENLR		1	ACRE_090600	ACRE_090600	0	2	0.5438	0	1	1	663.871	1326.73	1326.74	-2.49	-0.00165	CID (Collision Induced Dissociation)	MS2	75.244	150	46.8251	8338	CCAB-4a2.raw	F598	2.74	1
FALSE	High	Sequest HT (A2)	Unambiguous	ADGGAVVLLENLR		1	ACRE_090600	ACRE_090600	0	2	0.3643	0	1	1	663.873	1326.74	1326.74	0.73	0.00048	CID (Collision Induced Dissociation)	MS2	75.1557	150	47.0315	8024	CCAB-3a2.raw	F592	2.69	1
FALSE	High	Sequest HT (A2)	Unambiguous	ADGGAVVLLENLR		1	ACRE_090600	ACRE_090600	0	3	0.5539	0	1	1	442.917	1326.74	1326.74	-0.53	-0.00023	CID (Collision Induced Dissociation)	MS2	31.4496	37.861	42.1921	12933	CCAB-11a2.raw	F624	2.69	1
FALSE	High	Sequest HT (A2)	Unambiguous	YSLQPVVPELEK		1	ACRE_090600	ACRE_090600	0	2	0.6202	0	1	1	701.385	1401.76	1401.76	0.72	0.0005	CID (Collision Induced Dissociation)	MS2	29.9883	6.203	38.9811	11365	WT-2a2.raw	F630	2.58	1
FALSE	High	Sequest HT (A2)	Unambiguous	FHIEEEGSAK		1	ACRE_090600	ACRE_090600	0	3	0.5214	0	1	1	382.852	1146.54	1146.54	-0.53	-0.0002	CID (Collision Induced Dissociation)	MS2	36.2503	17.814	24.6783	4839	WT-2a2.raw	F630	2.57	1
FALSE	High	Sequest HT (A2)	Unambiguous	LSITDVDLK		1	ACRE_090600	ACRE_090600	0	2	0.374	0	1	1	502.287	1003.57	1003.57	-0.54	-0.00027	CID (Collision Induced Dissociation)	MS2	46.5177	84.083	32.534	4573	CCAB-8a.raw	F608	2.54	1
FALSE	High	Sequest HT (A2)	Unambiguous	LSITDVDLK		1	ACRE_090600	ACRE_090600	0	2	0.371	0	1	1	502.287	1003.57	1003.57	-1.14	-0.00057	CID (Collision Induced Dissociation)	MS2	64.4702	150	35.1973	4939	CCAB-1a.raw	F578	2.48	1
FALSE	High	Sequest HT (A2)	Unambiguous	LSITDVDLK		1	ACRE_090600	ACRE_090600	0	2	0.3416	0	1	1	502.287	1003.57	1003.57	0.51	0.00025	CID (Collision Induced Dissociation)	MS2	34.3546	57.754	40.4861	6622	CCAB-3a3.raw	F594	2.43	1
FALSE	High	Sequest HT (A2)	Unambiguous	LSITDVDLK		1	ACRE_090600	ACRE_090600	0	2	0.4107	0	1	1	502.287	1003.57	1003.57	-1.11	-0.00056	CID (Collision Induced Dissociation)	MS2	43.0471	150	40.307	6933	CCAB-3a1.raw	F590	2.24	1
FALSE	High	Sequest HT (A2)	Unambiguous	VDFNVPLDENKK		1	ACRE_090600	ACRE_090600	1	2	0.148	0	1	1	709.369	1417.73	1417.73	-0.42	-0.0003	CID (Collision Induced Dissociation)	MS2	71.5601	43.03	37.6682	7192	CCAB-2a3-2.raw	F587	2.23	1
FALSE	High	Sequest HT (A2)	Unambiguous	LSITDVDLK		1	ACRE_090600	ACRE_090600	0	2	0.3543	0	1	1	502.288	1003.57	1003.57	0.95	0.00048	CID (Collision Induced Dissociation)	MS2	51.5367	14.043	40.3995	8152	CCAB-2a3-2.raw	F587	2.23	1
FALSE	High	Sequest HT (A2)	Unambiguous	LSITDVDLK		1	ACRE_090600	ACRE_090600	0	2	0.3333	0	1	1	502.287	1003.57	1003.57	0.53	0.00027	CID (Collision Induced Dissociation)	MS2	49.3751	23.316	40.4679	8476	CCAB-3a1-2.raw	F591	2.22	1
FALSE	High	Sequest HT (A2)	Unambiguous	LSITDVDLK		1	ACRE_090600	ACRE_090600	0	2	0.3591	0	1	1	502.287	1003.57	1003.57	0.63	0.00032	CID (Collision Induced Dissociation)	MS2	50.652	150	40.6353	5480	CCAB-4a3.raw	F600	2.2	1
FALSE	High	Sequest HT (A2)	Unambiguous	LSITDVDLK		1	ACRE_090600	ACRE_090600	0	2	0.3641	0	1	1	502.287	1003.57	1003.57	-0.79	-0.0004	CID (Collision Induced Dissociation)	MS2	55.5172	12.007	36.142	10113	WT-2a2.raw	F630	2.17	1
FALSE	High	Sequest HT (A2)	Unambiguous	YSLQPVVPELEK		1	ACRE_090600	ACRE_090600	0	2	0.3796	0	1	1	701.385	1401.76	1401.76	0.19	0.00013	CID (Collision Induced Dissociation)	MS2	47.5789	25.162	38.3227	7766	CCAB-11a.raw	F623	2.16	1
FALSE	High	Sequest HT (A2)	Unambiguous	LSITDVDLK		1	ACRE_090600	ACRE_090600	0	2	0.3037	0	1	1	502.287	1003.57	1003.57	0.18	9e-05	CID (Collision Induced Dissociation)	MS2	64.9766	150	33.3072	6185	WT-a.raw	F635	2.14	1
FALSE	High	Sequest HT (A2)	Unambiguous	LSITDVDLK		1	ACRE_090600	ACRE_090600	0	2	0.3714	0	1	1	502.288	1003.57	1003.57	0.74	0.00037	CID (Collision Induced Dissociation)	MS2	34.7165	34.433	40.2493	6923	CCAB-4a3-2.raw	F601	2.1	1
ACRE_090595	ACRE_090595	26	8	15	8	361	36.8	5.03	45.15	8	Not Found	Not Found	Not Found	Not Found	Not Found	Not Found	Not Found	Not Found	Not Found	Not Found	Not Found	Not Found	Not Found	Not Found	Not Found	High	Not Found	Not Found	Not Found	Not Found	Not Found	High	High	Not Found	Not Found	Not Found	Not Found	Not Found	High	Not Found	Not Found	Not Found	Not Found	Not Found	Not Found	Not Found	Not Found	Not Found	1
Protein Group ID	# Proteins	# Unique Peptides	# Peptides	# PSMs	Group Description	Found in Sample: [S578] F578: Sample, alpha, CCAB-1	Found in Sample: [S579] F579: Sample, precursor, CCAB-1	Found in Sample: [S580] F580: Sample, beta, CCAB-1	Found in Sample: [S587] F587: Sample, alpha, CCAB-2	Found in Sample: [S588] F588: Sample, beta, CCAB-2	Found in Sample: [S589] F589: Sample, beta, CCAB-2	Found in Sample: [S590] F590: Sample, alpha, CCAB-3	Found in Sample: [S591] F591: Sample, alpha, CCAB-3	Found in Sample: [S592] F592: Sample, alpha, CCAB-3	Found in Sample: [S593] F593: Sample, alpha, CCAB-3	Found in Sample: [S594] F594: Sample, alpha, CCAB-3	Found in Sample: [S595] F595: Sample, alpha, CCAB-3	Found in Sample: [S596] F596: Sample, alpha, CCAB-4	Found in Sample: [S597] F597: Sample, alpha, CCAB-4	Found in Sample: [S598] F598: Sample, alpha, CCAB-4	Found in Sample: [S599] F599: Sample, alpha, CCAB-4	Found in Sample: [S600] F600: Sample, alpha, CCAB-4	Found in Sample: [S601] F601: Sample, alpha, CCAB-4	Found in Sample: [S608] F608: Sample, alpha, CCAB-8	Found in Sample: [S609] F609: Sample, precursor, CCAB-8	Found in Sample: [S610] F610: Sample, beta, CCAB-8	Found in Sample: [S623] F623: Sample, alpha, CCAB-11	Found in Sample: [S624] F624: Sample, alpha, CCAB-11	Found in Sample: [S625] F625: Sample, precursor, CCAB-11	Found in Sample: [S626] F626: Sample, precursor, CCAB-11	Found in Sample: [S627] F627: Sample, beta, CCAB-11	Found in Sample: [S628] F628: Sample, beta, CCAB-11	Found in Sample: [S629] F629: Sample, alpha, wild-type b	Found in Sample: [S630] F630: Sample, alpha, wild-type b	Found in Sample: [S631] F631: Sample, precursor, wild-type b	Found in Sample: [S632] F632: Sample, precursor, wild-type b	Found in Sample: [S633] F633: Sample, beta, wild-type b	Found in Sample: [S634] F634: Sample, beta, wild-type b	Found in Sample: [S635] F635: Sample, alpha, wild-type a	Found in Sample: [S636] F636: Sample, precursor, wild-type a	Found in Sample: [S637] F637: Sample, beta, wild-type a	Found in Sample: [S643] F643: Sample, alpha, CCAB-6	Found in Sample: [S644] F644: Sample, alpha, CCAB-6
2956	1	8	8	15	[Master Protein] ACRE_090595	Not Found	Not Found	Not Found	Not Found	Not Found	Not Found	Not Found	Not Found	Not Found	Not Found	Not Found	Not Found	Not Found	Not Found	Not Found	High	Not Found	Not Found	Not Found	Not Found	Not Found	High	High	Not Found	Not Found	Not Found	Not Found	Not Found	High	Not Found	Not Found	Not Found	Not Found	Not Found	Not Found	Not Found	Not Found	Not Found
Checked	Confidence	Identifying Node	PSM Ambiguity	Annotated Sequence	Modifications	# Proteins	Master Protein Accessions	Protein Accessions	# Missed Cleavages	Charge	DeltaScore	DeltaCn	Rank	Search Engine Rank	m/z [Da]	MH+ [Da]	Theo. MH+ [Da]	DeltaM [ppm]	Deltam/z [Da]	Activation Type	MS Order	Isolation Interference [%]	Ion Inject Time [ms]	RT [min]	First Scan	Spectrum File	File ID	XCorr	# Protein Groups
FALSE	High	Sequest HT (A2)	Unambiguous	SAVDLYTQALALNPR		1	ACRE_090595	ACRE_090595	0	2	0.6568	0	1	1	816.437	1631.87	1631.88	-5.76	-0.0047	CID (Collision Induced Dissociation)	MS2	45.2951	24.351	40.9811	8563	CCAB-11a.raw	F623	4.05	1
FALSE	High	Sequest HT (A2)	Unambiguous	RVDEMQAEEADLPR		1	ACRE_090595	ACRE_090595	1	2	0.6402	0	1	1	829.892	1658.78	1658.78	-1.95	-0.00161	CID (Collision Induced Dissociation)	MS2	49.5941	13.395	30.1883	7683	CCAB-11a2.raw	F624	4.03	1
FALSE	High	Sequest HT (A2)	Unambiguous	GIEYEGNGGSDAMK		1	ACRE_090595	ACRE_090595	0	2	0.6744	0	1	1	714.309	1427.61	1427.61	-0.24	-0.00017	CID (Collision Induced Dissociation)	MS2	44.9875	22.068	27.0033	6195	CCAB-11a2.raw	F624	3.9	1
FALSE	High	Sequest HT (A2)	Unambiguous	GIEYEGNGGSDAMKK		1	ACRE_090595	ACRE_090595	1	2	0.5971	0	1	1	778.361	1555.72	1555.71	6.18	0.00481	CID (Collision Induced Dissociation)	MS2	62.4754	57.195	24.6628	5128	CCAB-11a2.raw	F624	3.45	1
FALSE	High	Sequest HT (A2)	Unambiguous	TTAGASAGGDASSSPAGGEPTEEQKK		1	ACRE_090595	ACRE_090595	1	3	0.5994	0	1	1	797.7	2391.09	2391.09	-1.96	-0.00156	CID (Collision Induced Dissociation)	MS2	16.2368	46.318	22.0792	3873	WT-2a2.raw	F630	3.32	1
FALSE	High	Sequest HT (A2)	Unambiguous	ADADAAVALDPTYTK		1	ACRE_090595	ACRE_090595	0	2	0.4164	0	1	1	761.375	1521.74	1521.74	-0.16	-0.00013	CID (Collision Induced Dissociation)	MS2	70.0306	45.926	36.5076	7047	CCAB-4a2-2.raw	F599	3.29	1
FALSE	High	Sequest HT (A2)	Unambiguous	RVDEmQAEEADLPR	M5(Oxidation)	1	ACRE_090595	ACRE_090595	1	2	0.6034	0	1	1	837.895	1674.78	1674.78	4.27	0.00358	CID (Collision Induced Dissociation)	MS2	60.6308	42.964	27.1955	6285	CCAB-11a2.raw	F624	2.95	1
FALSE	High	Sequest HT (A2)	Unambiguous	SAVDLYTQALALNPR		1	ACRE_090595	ACRE_090595	0	2	0.4057	0	1	1	816.439	1631.87	1631.88	-3.02	-0.00247	CID (Collision Induced Dissociation)	MS2	28.5778	7.026	41.6283	12714	CCAB-11a2.raw	F624	2.81	1
FALSE	High	Sequest HT (A2)	Unambiguous	TTAGASAGGDASSSPAGGEPTEEQKK		1	ACRE_090595	ACRE_090595	1	3	0.5479	0	1	1	797.699	2391.08	2391.09	-3.06	-0.00244	CID (Collision Induced Dissociation)	MS2	50.807	82.812	22.0881	4141	CCAB-11a2.raw	F624	2.61	1
FALSE	High	Sequest HT (A2)	Unambiguous	ADADAAVALDPTYTK		1	ACRE_090595	ACRE_090595	0	2	0.4462	0	1	1	761.374	1521.74	1521.74	-2.24	-0.0017	CID (Collision Induced Dissociation)	MS2	37.5523	15.956	32.1544	5667	CCAB-11a.raw	F623	2.6	1
FALSE	High	Sequest HT (A2)	Unambiguous	RRVDEMQAEEADLPR		1	ACRE_090595	ACRE_090595	2	3	0.2829	0	1	1	605.632	1814.88	1814.88	0.65	0.00039	CID (Collision Induced Dissociation)	MS2	41.6112	11.37	28.6904	6973	CCAB-11a2.raw	F624	2.58	1
FALSE	High	Sequest HT (A2)	Unambiguous	GAmEAYAR	M3(Oxidation)	1	ACRE_090595	ACRE_090595	0	2	0.418	0	1	1	442.7	884.394	884.393	0.61	0.00027	CID (Collision Induced Dissociation)	MS2	36.5978	150	17.8034	3010	CCAB-11a2.raw	F624	2.56	1
FALSE	High	Sequest HT (A2)	Unambiguous	RVDEMQAEEADLPR		1	ACRE_090595	ACRE_090595	1	2	0.4545	0	1	1	829.896	1658.78	1658.78	2.52	0.00209	CID (Collision Induced Dissociation)	MS2	79.5155	150	30.5507	5094	CCAB-11a.raw	F623	2.42	1
FALSE	High	Sequest HT (A2)	Unambiguous	GAmEAYAR	M3(Oxidation)	1	ACRE_090595	ACRE_090595	0	2	0.1717	0	1	1	442.7	884.392	884.393	-0.96	-0.00042	CID (Collision Induced Dissociation)	MS2	57.8584	150	18.6614	3210	CCAB-11a2.raw	F624	2.33	1
FALSE	High	Sequest HT (A2)	Unambiguous	GAmEAYAR	M3(Oxidation)	1	ACRE_090595	ACRE_090595	0	2	0.2281	0	1	1	442.7	884.392	884.393	-0.88	-0.00039	CID (Collision Induced Dissociation)	MS2	57.1003	150	18.7822	2988	WT-2a2.raw	F630	2.28	1
ACRE_090530	ACRE_090530	2	1	1	1	854	93.2	6.9	2.94	1	Not Found	Not Found	Not Found	Not Found	Not Found	Not Found	Not Found	Not Found	Not Found	Not Found	Not Found	Not Found	Not Found	Not Found	Not Found	Not Found	Not Found	Not Found	Not Found	Not Found	Not Found	Not Found	Not Found	Not Found	Not Found	Not Found	High	Not Found	Not Found	Not Found	Not Found	Not Found	Not Found	Not Found	Not Found	Not Found	Not Found	Not Found	1
Protein Group ID	# Proteins	# Unique Peptides	# Peptides	# PSMs	Group Description	Found in Sample: [S578] F578: Sample, alpha, CCAB-1	Found in Sample: [S579] F579: Sample, precursor, CCAB-1	Found in Sample: [S580] F580: Sample, beta, CCAB-1	Found in Sample: [S587] F587: Sample, alpha, CCAB-2	Found in Sample: [S588] F588: Sample, beta, CCAB-2	Found in Sample: [S589] F589: Sample, beta, CCAB-2	Found in Sample: [S590] F590: Sample, alpha, CCAB-3	Found in Sample: [S591] F591: Sample, alpha, CCAB-3	Found in Sample: [S592] F592: Sample, alpha, CCAB-3	Found in Sample: [S593] F593: Sample, alpha, CCAB-3	Found in Sample: [S594] F594: Sample, alpha, CCAB-3	Found in Sample: [S595] F595: Sample, alpha, CCAB-3	Found in Sample: [S596] F596: Sample, alpha, CCAB-4	Found in Sample: [S597] F597: Sample, alpha, CCAB-4	Found in Sample: [S598] F598: Sample, alpha, CCAB-4	Found in Sample: [S599] F599: Sample, alpha, CCAB-4	Found in Sample: [S600] F600: Sample, alpha, CCAB-4	Found in Sample: [S601] F601: Sample, alpha, CCAB-4	Found in Sample: [S608] F608: Sample, alpha, CCAB-8	Found in Sample: [S609] F609: Sample, precursor, CCAB-8	Found in Sample: [S610] F610: Sample, beta, CCAB-8	Found in Sample: [S623] F623: Sample, alpha, CCAB-11	Found in Sample: [S624] F624: Sample, alpha, CCAB-11	Found in Sample: [S625] F625: Sample, precursor, CCAB-11	Found in Sample: [S626] F626: Sample, precursor, CCAB-11	Found in Sample: [S627] F627: Sample, beta, CCAB-11	Found in Sample: [S628] F628: Sample, beta, CCAB-11	Found in Sample: [S629] F629: Sample, alpha, wild-type b	Found in Sample: [S630] F630: Sample, alpha, wild-type b	Found in Sample: [S631] F631: Sample, precursor, wild-type b	Found in Sample: [S632] F632: Sample, precursor, wild-type b	Found in Sample: [S633] F633: Sample, beta, wild-type b	Found in Sample: [S634] F634: Sample, beta, wild-type b	Found in Sample: [S635] F635: Sample, alpha, wild-type a	Found in Sample: [S636] F636: Sample, precursor, wild-type a	Found in Sample: [S637] F637: Sample, beta, wild-type a	Found in Sample: [S643] F643: Sample, alpha, CCAB-6	Found in Sample: [S644] F644: Sample, alpha, CCAB-6
340	1	1	1	1	[Master Protein] ACRE_090530	Not Found	Not Found	Not Found	Not Found	Not Found	Not Found	Not Found	Not Found	Not Found	Not Found	Not Found	Not Found	Not Found	Not Found	Not Found	Not Found	Not Found	Not Found	Not Found	Not Found	Not Found	Not Found	Not Found	Not Found	Not Found	Not Found	High	Not Found	Not Found	Not Found	Not Found	Not Found	Not Found	Not Found	Not Found	Not Found	Not Found	Not Found
Checked	Confidence	Identifying Node	PSM Ambiguity	Annotated Sequence	Modifications	# Proteins	Master Protein Accessions	Protein Accessions	# Missed Cleavages	Charge	DeltaScore	DeltaCn	Rank	Search Engine Rank	m/z [Da]	MH+ [Da]	Theo. MH+ [Da]	DeltaM [ppm]	Deltam/z [Da]	Activation Type	MS Order	Isolation Interference [%]	Ion Inject Time [ms]	RT [min]	First Scan	Spectrum File	File ID	XCorr	# Protein Groups
FALSE	High	Sequest HT (A2)	Unambiguous	THVEAPGDGSAVQK		1	ACRE_090530	ACRE_090530	0	2	0.7347	0	1	1	698.347	1395.69	1395.69	-0.09	-6e-05	CID (Collision Induced Dissociation)	MS2	55.4267	82.719	22.8917	4503	CCAB-11b2.raw	F628	2.94	1
ACRE_090510	ACRE_090510	24	6	12	6	429	48.5	6.43	40.41	6	Not Found	Not Found	High	Not Found	High	High	Not Found	Not Found	Not Found	Not Found	Not Found	Not Found	Not Found	Not Found	Not Found	Not Found	Not Found	Not Found	Not Found	Not Found	Not Found	Not Found	Not Found	Not Found	Not Found	Not Found	Not Found	Not Found	Not Found	Not Found	Not Found	Not Found	Not Found	Not Found	Not Found	High	Not Found	Not Found	1
Protein Group ID	# Proteins	# Unique Peptides	# Peptides	# PSMs	Group Description	Found in Sample: [S578] F578: Sample, alpha, CCAB-1	Found in Sample: [S579] F579: Sample, precursor, CCAB-1	Found in Sample: [S580] F580: Sample, beta, CCAB-1	Found in Sample: [S587] F587: Sample, alpha, CCAB-2	Found in Sample: [S588] F588: Sample, beta, CCAB-2	Found in Sample: [S589] F589: Sample, beta, CCAB-2	Found in Sample: [S590] F590: Sample, alpha, CCAB-3	Found in Sample: [S591] F591: Sample, alpha, CCAB-3	Found in Sample: [S592] F592: Sample, alpha, CCAB-3	Found in Sample: [S593] F593: Sample, alpha, CCAB-3	Found in Sample: [S594] F594: Sample, alpha, CCAB-3	Found in Sample: [S595] F595: Sample, alpha, CCAB-3	Found in Sample: [S596] F596: Sample, alpha, CCAB-4	Found in Sample: [S597] F597: Sample, alpha, CCAB-4	Found in Sample: [S598] F598: Sample, alpha, CCAB-4	Found in Sample: [S599] F599: Sample, alpha, CCAB-4	Found in Sample: [S600] F600: Sample, alpha, CCAB-4	Found in Sample: [S601] F601: Sample, alpha, CCAB-4	Found in Sample: [S608] F608: Sample, alpha, CCAB-8	Found in Sample: [S609] F609: Sample, precursor, CCAB-8	Found in Sample: [S610] F610: Sample, beta, CCAB-8	Found in Sample: [S623] F623: Sample, alpha, CCAB-11	Found in Sample: [S624] F624: Sample, alpha, CCAB-11	Found in Sample: [S625] F625: Sample, precursor, CCAB-11	Found in Sample: [S626] F626: Sample, precursor, CCAB-11	Found in Sample: [S627] F627: Sample, beta, CCAB-11	Found in Sample: [S628] F628: Sample, beta, CCAB-11	Found in Sample: [S629] F629: Sample, alpha, wild-type b	Found in Sample: [S630] F630: Sample, alpha, wild-type b	Found in Sample: [S631] F631: Sample, precursor, wild-type b	Found in Sample: [S632] F632: Sample, precursor, wild-type b	Found in Sample: [S633] F633: Sample, beta, wild-type b	Found in Sample: [S634] F634: Sample, beta, wild-type b	Found in Sample: [S635] F635: Sample, alpha, wild-type a	Found in Sample: [S636] F636: Sample, precursor, wild-type a	Found in Sample: [S637] F637: Sample, beta, wild-type a	Found in Sample: [S643] F643: Sample, alpha, CCAB-6	Found in Sample: [S644] F644: Sample, alpha, CCAB-6
1477	1	6	6	12	[Master Protein] ACRE_090510	Not Found	Not Found	High	Not Found	High	High	Not Found	Not Found	Not Found	Not Found	Not Found	Not Found	Not Found	Not Found	Not Found	Not Found	Not Found	Not Found	Not Found	Not Found	Not Found	Not Found	Not Found	Not Found	Not Found	Not Found	Not Found	Not Found	Not Found	Not Found	Not Found	Not Found	Not Found	Not Found	Not Found	High	Not Found	Not Found
[truncated: 106,150 more rows]

## Sheet: Result table - Chymotrypsin
Accession	Description	Coverage [%]	# Peptides	# PSMs	# Unique Peptides	# AAs	MW [kDa]	calc. pI	Score Sequest HT: Sequest HT	# Peptides (by Search Engine): Sequest HT	Found in Sample: [S602] F602: Sample, alpha, CCAB-5Ch	Found in Sample: [S603] F603: Sample, precursor, CCAB-5Ch	Found in Sample: [S604] F604: Sample, beta, CCAB-5Ch	Found in Sample: [S605] F605: Sample, alpha, CCAB-7Ch	Found in Sample: [S606] F606: Sample, precursor, CCAB-7Ch	Found in Sample: [S607] F607: Sample, beta, CCAB-7Ch	Found in Sample: [S645] F645: Sample, alpha, CCAB-7Ch	Found in Sample: [S646] F646: Sample, alpha, CCAB-7Ch	Found in Sample: [S661] F661: Sample, alpha, CCAB-5Ch	# Protein Groups
[truncated: 5,772 more rows]

[truncated: 2 more sheets: Result table - NT truncation, Analysis summary]
