# Supplementary material for: A Straightforward Approach to Synthesize 7-Aminocephalosporanic Acid In Vivo in the Cephalosporin C Producer Acremonium chrysogenum
Source: J Fungi (Basel). 2022 Apr 26;8(5):450. doi: 10.3390/jof8050450 (PMC9144927; doi:10.3390/jof8050450)
Supplement: Supplementary file 1 [file jof-08-00450-s001.zip › Lin et al. Supplementary File 1.pdf]

## Supplementary File 1

**Table S1.** Oligonucleotides used in this study.

| Oligonucleotide   | Sequence (5' → 3')                                                           | Specificity                                   |
|-------------------|------------------------------------------------------------------------------|-----------------------------------------------|
| MCS_pAB           | GCGGCCGCGAGACCGCTAGCTCGA<br>GAATTCTACGTACTAGTAGATCTGGT<br>CTCGGATCCA         | Insertion of <i>Bsal</i> cutting site forward |
| MCS_pAB-rev       | TGGATCCGAGACCAGATCTACTAGT<br>ACGTAGAATTCTCGAGCTAGCGGTC<br>TCGCGGCCGC         | Insertion of <i>Bsal</i> cutting site reverse |
| His-CCAA-ATGdel_F | GGTCTCAGCCGATGCACCACACCA<br>TCACCACGGCGGTGGTGGCTCAGA<br>GCCGACATCAACCCACAGGC | CCAA N terminal modification forward          |
| CCAA_R            | CACGGTCTCTGATCTCAGGCG                                                        | CCAA reverse                                  |
| CCAA inter seq_F  | ACTTCTTCAGAACCCCCACTGAG                                                      | CCAA sequencing forward-1                     |
| Opt-TrpC-pAB_F    | TTGGTCTCGGTGCCACTTAACGTTA<br>CTGAAATCATCAAACAGC                              | GG PCR vector pAB-nat forward                 |
| pXUL-10_F-2       | AACTGGGGTCTCCTGGTATGCACC<br>ACACCATCACCACG                                   | EGFP-CCAA: GG PCR insert CCAA forward         |
| pXUL-10_R-2       | AACTGGGGTCTCCATCCGGCGTAG<br>TCGGGGACGTCG                                     | EGFP-CCAA: GG PCR insert CCAA reverse         |
| CCAC_SF           | AGACGTCTCGGGCTGCTGATG                                                        | CCAC sequencing forward                       |
| CCAC_SR           | GCTGGGGACGAGGCCGTTGG                                                         | CCAC sequencing reverse                       |
| 1751              | GCCATATTTTCCTGCTCTCC                                                         | Pgpda sequencing forward                      |
| 1757              | AGCTGACATCGACACCAAG                                                          | TtrpC sequencing reverse                      |
| Southern probe_F  | CTGCATACAAGCCACGCTCG                                                         | SB probe CCAA forward                         |
| Southern probe_R  | CGGAGCAACGCCGTTGAAC                                                          | SB probe CCAA reverse                         |
| SB_a-tubulin_F    | GGCTGGTTGCCAGATTGC                                                           | SB probe a-tubulin forward                    |
| SB_a-tubulin_R    | GAGTTGGCCTCGTGAGC                                                            | SB probe a-tubulin reverse                    |
| CCAA-int seq_F2   | GCTGAGTACTGGGGCCCGGATTAT<br>G                                                | CCAA sequencing forward-2                     |
| CCAA-int seq_R    | GAGGATCATCCGGGAGGCGTCG                                                       | CCAA sequencing reverse                       |

**Table S2.** Agilent 1100 HPLC gradient elution method for measuring beta-lactam substances<sup>1</sup>.

| <b>Time (min)</b> | <b>0</b> | <b>3</b> | <b>4</b> | <b>8</b> | <b>9</b> | <b>10</b> | <b>10.25</b> | <b>12</b> |
|-------------------|----------|----------|----------|----------|----------|-----------|--------------|-----------|
| Eluent A (%)      | 100      | 100      | 95       | 90       | 5        | 5         | 100          | 100       |
| Eluent B (%)      | 0        | 0        | 5        | 10       | 95       | 95        | 0            | 0         |

<sup>1</sup>Eluent A: 100% H<sub>2</sub>O+0.05% H<sub>3</sub>PO<sub>4</sub>; Eluent B: 90% ACN+0.05% H<sub>3</sub>PO<sub>4</sub>; Flow rate: 1.2 ml/min; Elution time: 12 min; Sample injection volume: 2 µl; Sample storage: 4°C, Column temperature: 40°C

A

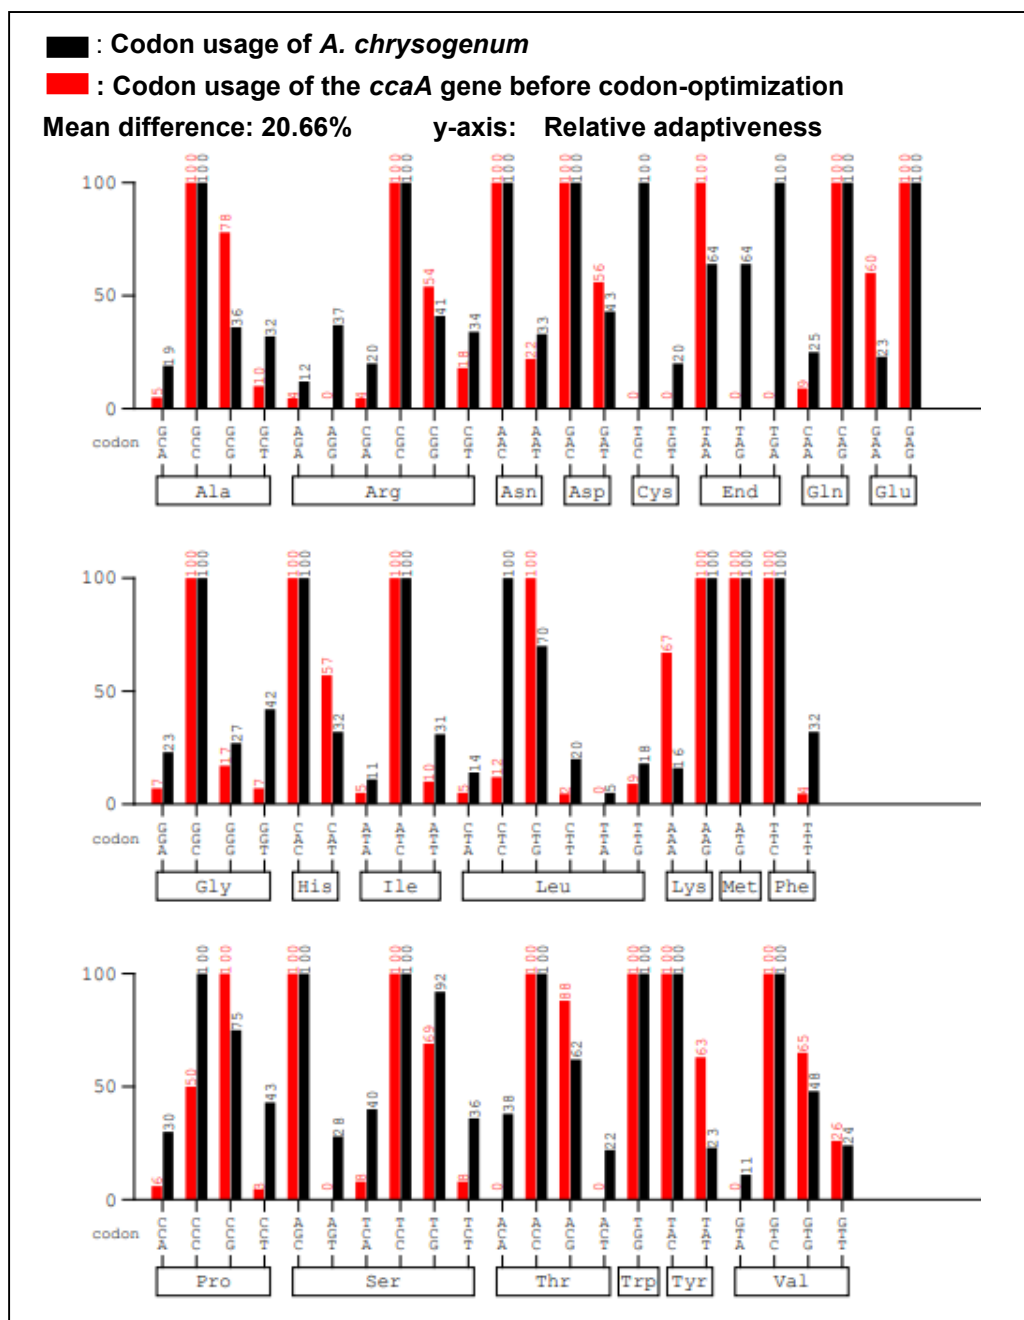

B

■ : Codon usage of *A. chrysogenum*

■ : Codon usage of the *ccaA* gene after codon-optimization

Mean difference: 7.09%

y-axis: Relative adaptiveness

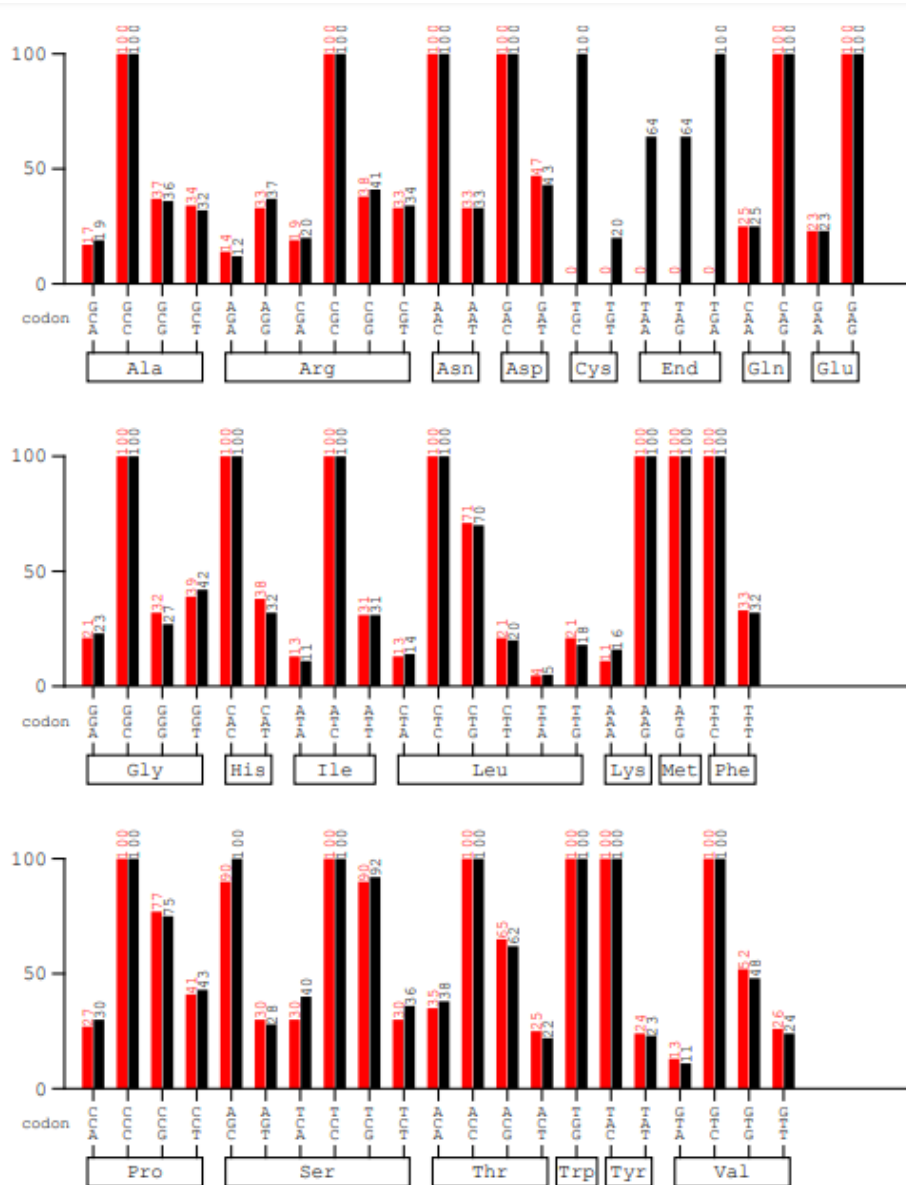

C

■ : Codon usage of *A. chrysogenum*

■ : Codon usage of the *ccaB* gene before codon-optimization

Mean difference: 48.34%

y-axis: Relative adaptiveness

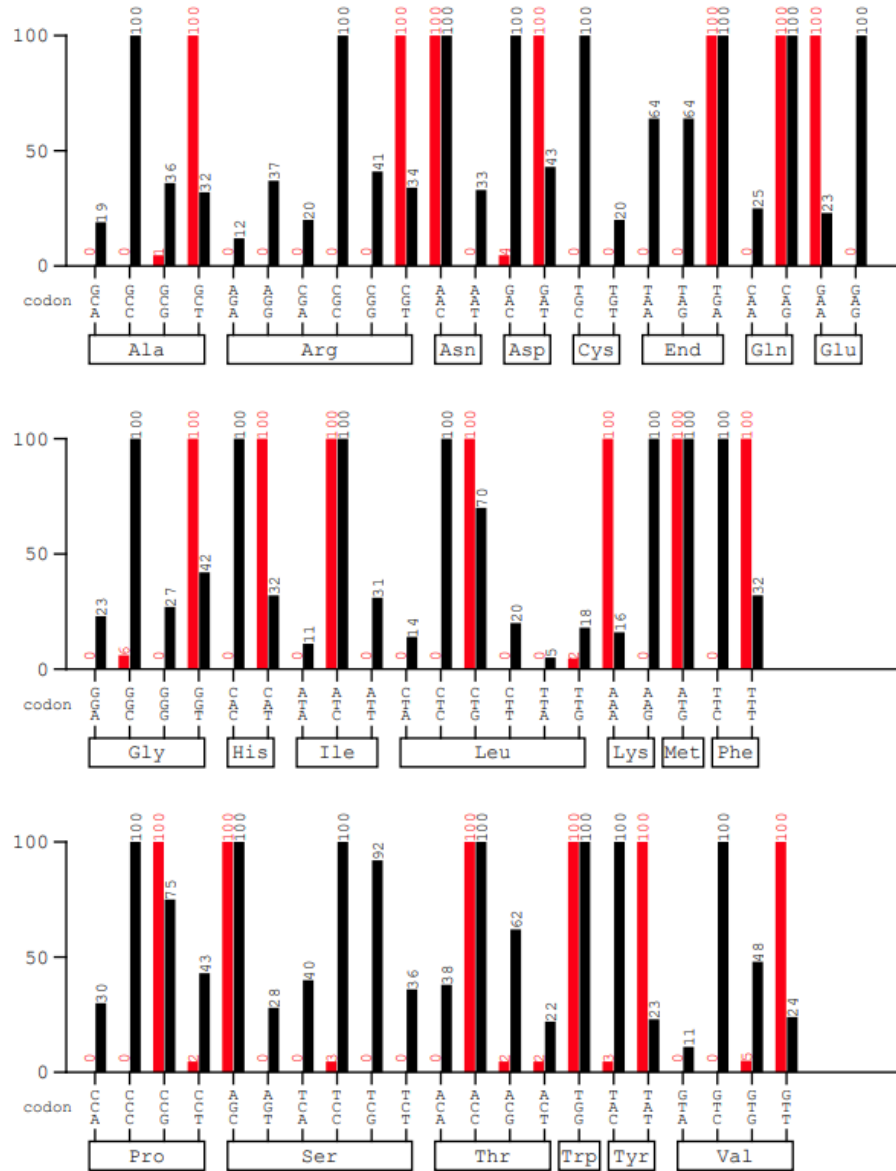

D

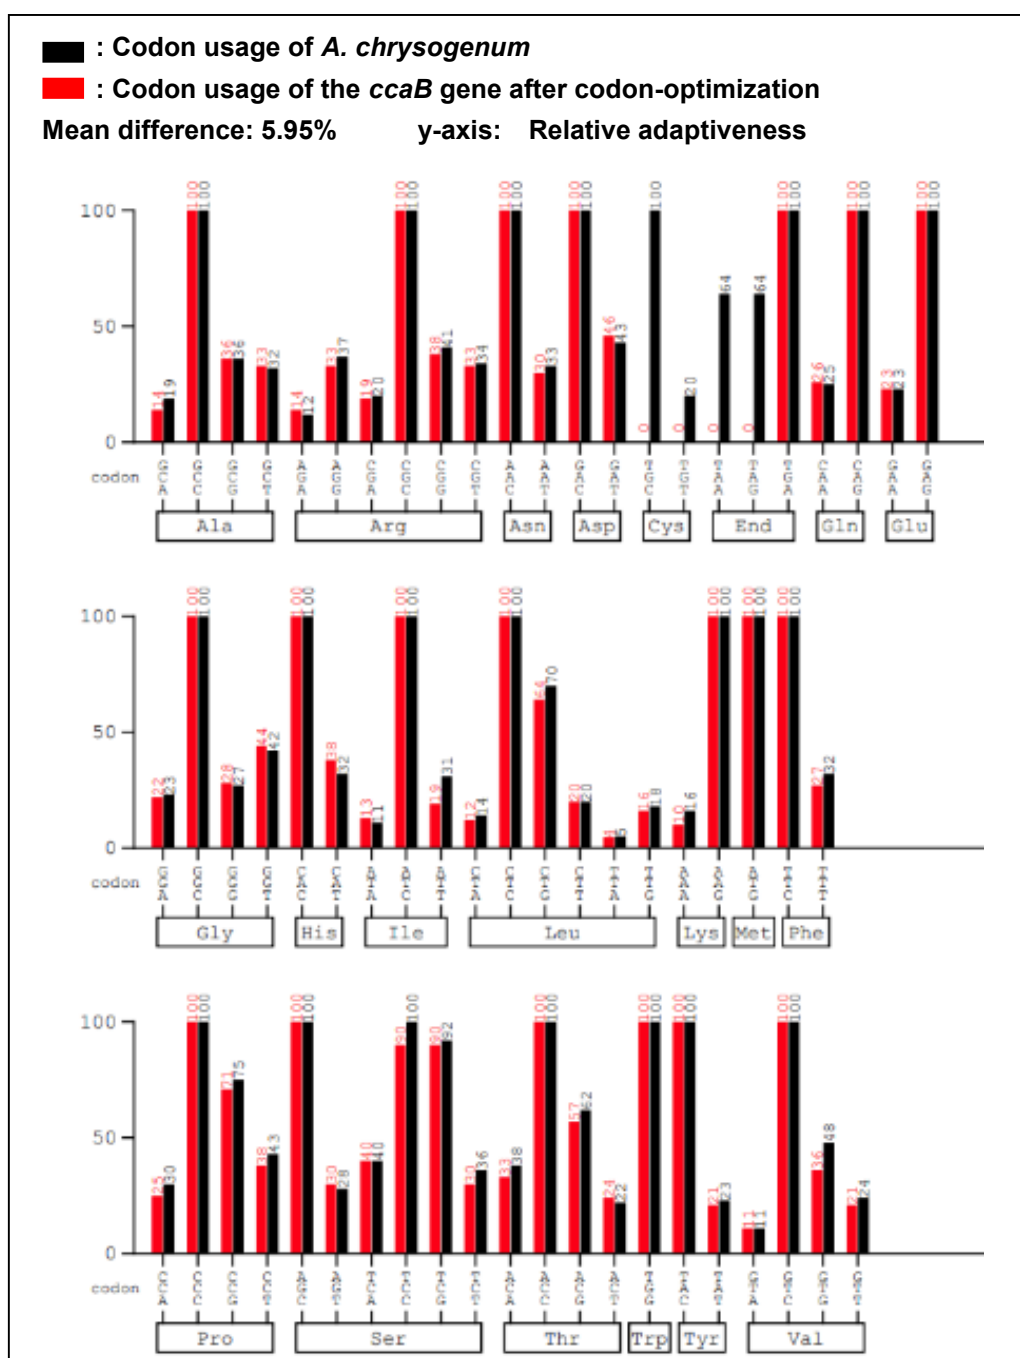

**Figure S1.** Codon optimization of the CCA coding sequences. (A) Codon usage bias between the investigated organism *A. chrysogenum* and the *ccaA* gene sequence originated from *Pseudomonas sp. GK16*. (B) Codon usage comparison of *ccaA* after codon-optimization. (C) Codon usage bias between *A. chrysogenum* and the *ccaB* sequence from *Pseudomonas sp. GK16*. (D) Codon usage comparison of *ccaB* after codon-optimization.

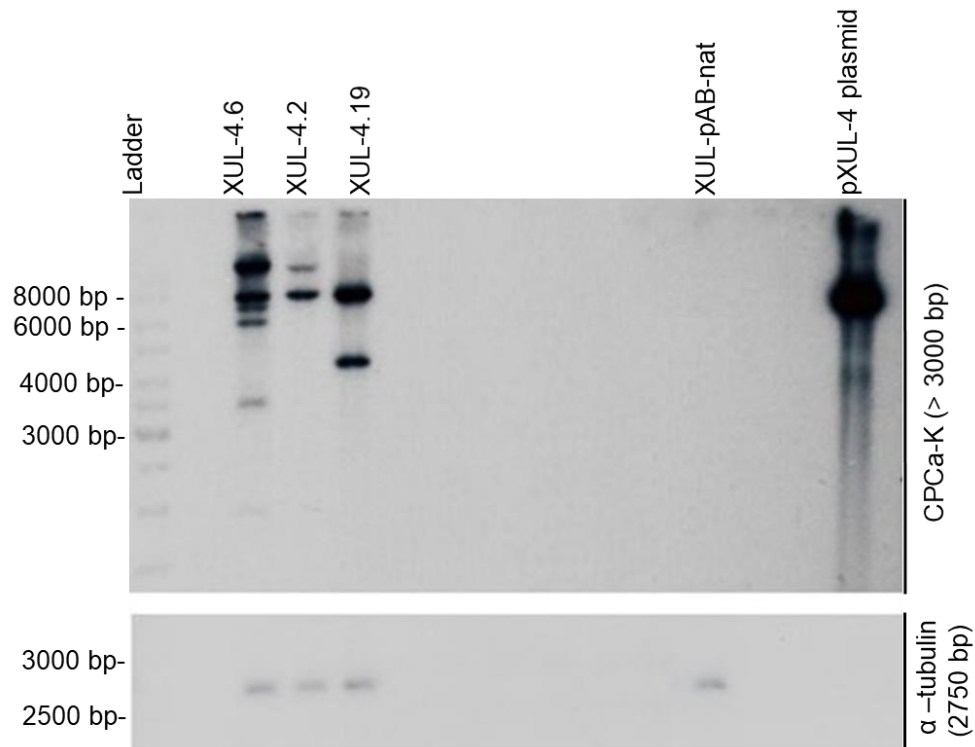

**Figure S2.** Southern blot analysis of recombinant CCA transformants to assess the copy number of gene integration. 30  $\mu$ g of genomic DNA of recombinant CCAA transformants were digested with *Hind*III. Southern blot hybridization was performed with a radioactively  $^{32}$ P-labeled probe specifically detecting the *ccaA* gene. For the quantification of the gene copy number, a labeled probe detecting  $\alpha$ -tubulin coding gene was used as a reference. For the quantification of the *ccaA* gene copy number, the band with the weakest signal intensity, which is the 3500 bp signal from XUL-4.6, is defined as one copy of the *ccaA* gene.

**A**

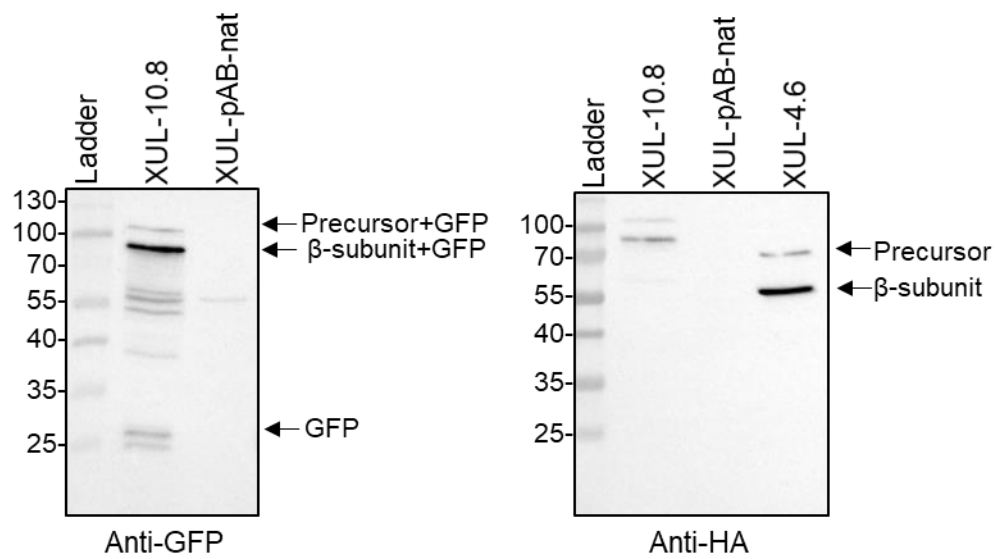

**B**

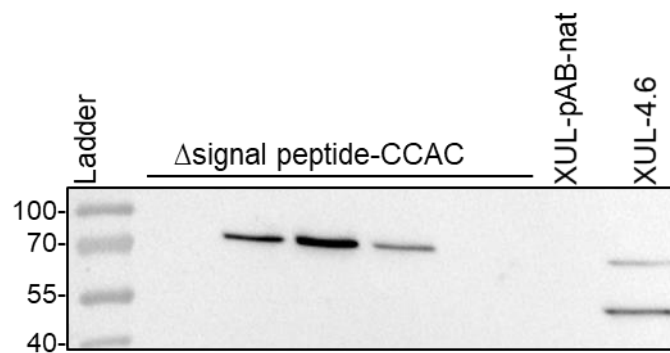

**Figure S3.** Supplementary western blot results. (A) Detection of C-terminal EGFP fused CCAA transformant (XUL-10.8) using anti-GFP antibody and anti-HA antibody. (B) Precursor bands detected from signal peptide deleted CCAC transformants.

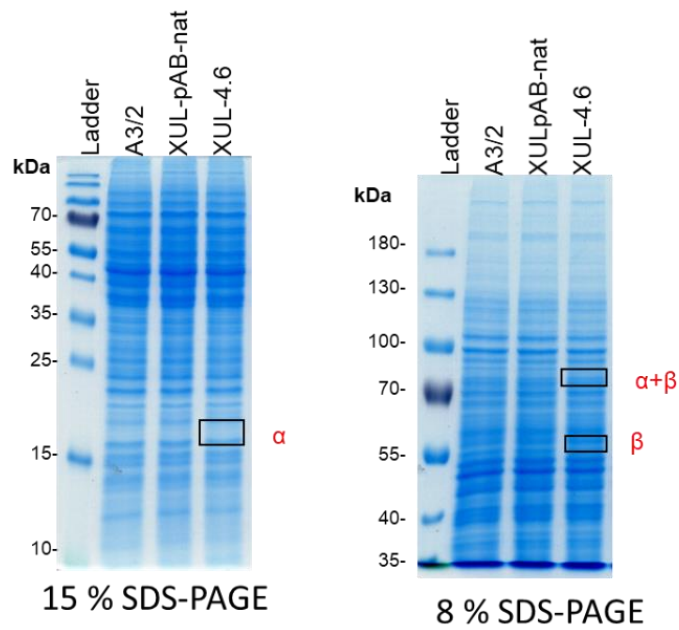

**Figure S4.** Example of preparing samples for protein MS analysis. SDS-PAGE was performed with 8% and 15% of gels followed by coomassie staining was followed the protein separation. The gel slices at the expected locations for the precursor,  $\alpha$ -subunit, and  $\beta$ -subunit were cut out for enzyme digestion and further sample preparations.

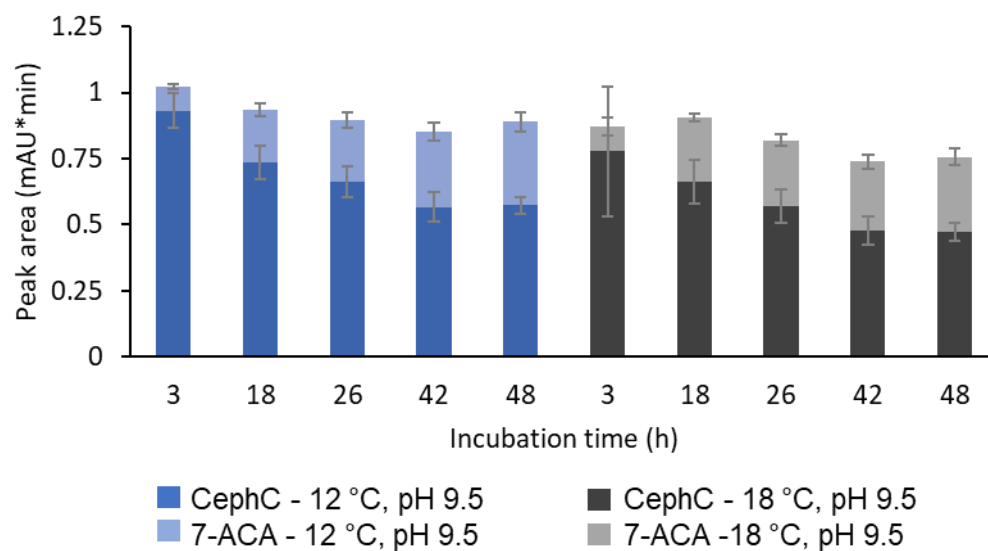

**Figure S5.** Time- and temperature-dependent degradation of CCA substrate and product. Shown are results for the XUL-4.6 strain, which was grown under conditions as described in the legend of Fig. 8A. HPLC samples were taken from the supernatants (pH 9.5) at different time points of incubation at 12°C (blue bars) or 18°C (grey bars). The peak areas of 7-ACA and CPC are presented as a cumulative bar chart.

**A**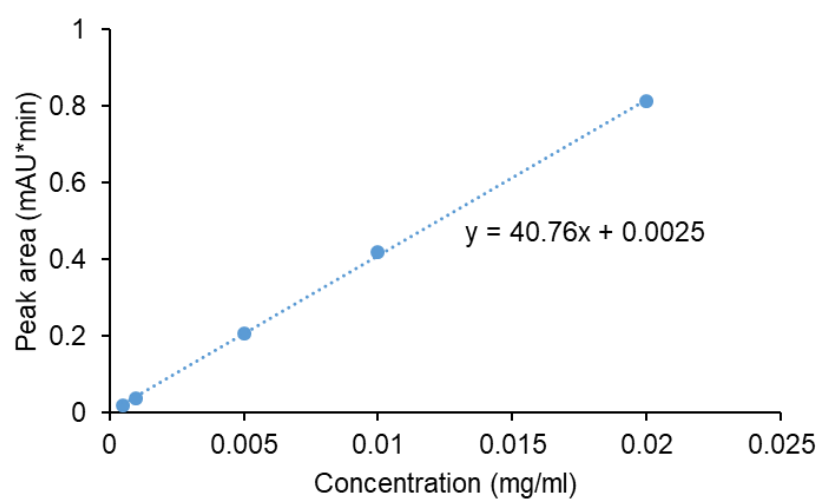**B**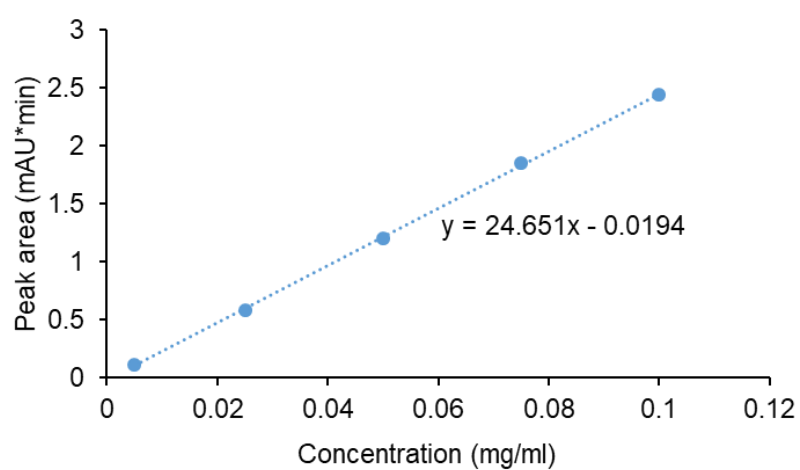

**Figure S6.** HPLC calibration curves generated using standard substances. The series dilutions of standard substances were prepared and measured by the identical method used for measuring all other samples. (A) The calibration curve of 7-ACA. (B) The calibration curve of CPC.

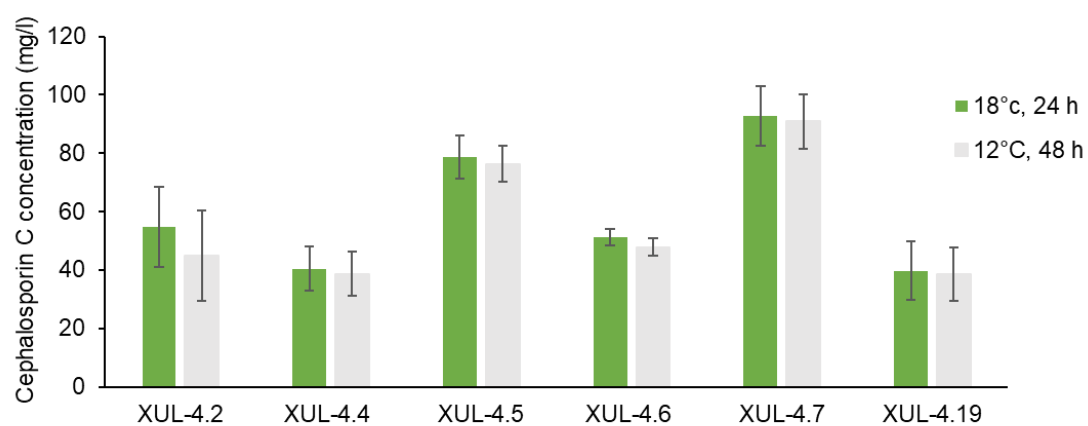

**Figure S7.** Investigation of CPC productivity of CCA transformants. Six out of 19 analyzed CCAA transformants are shown, and the pH of the culture supernatants from 72 hours of liquid culture was adjusted to 9.5. After harvesting supernatants, all samples were incubated for 24 hours at 18°C or 48 hours at 12°C. CPC concentrations of CCAA transformants were calculated according to the calibration curve generated from HPLC measurement.

**A**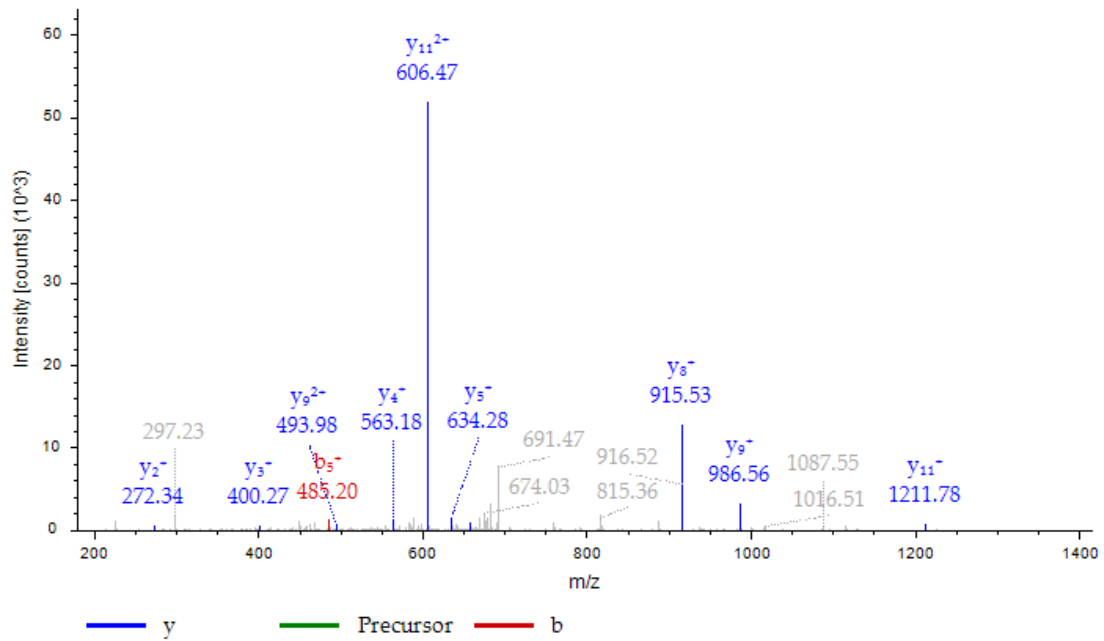**B**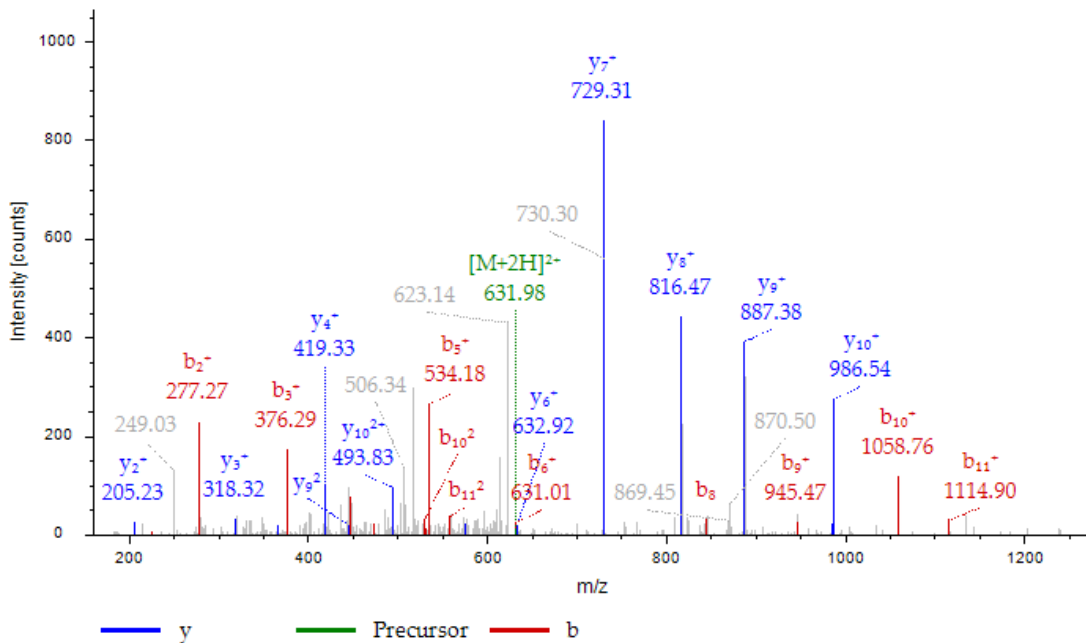

**Figure S8.** MS/MS-spectra of selected peptides. (A) Truncated N-Terminal peptide of the  $\alpha$ -subunit. Sequence: STPQAPIAAYKPR, Charge: +2, Monoisotopic m/z: 700.38656 Da (-1.7 mmu/-2.42 ppm), MH<sup>+</sup>: 1399.76584 Da, RT: 32.6754 min, identified with: Sequest HT (v1.17); XCorr:2.39, Fragment match tolerance used for search: 0.8 Da. (B) C-terminal peptide of the  $\alpha$ -subunit up to the autocatalytic site at AA171. Sequence: LYVASPGRTLGE, Charge: +2, Monoisotopic m/z: 631.84272 Da (+2.12 mmu/+3.36 ppm), MH<sup>+</sup>: 1262.67816 Da, RT: 34.3149 min, identified with: Sequest HT (v1.17); XCorr:3.44, fragment match tolerance: 0.8 Da.
